# Supplementary material for: Enantioselective synthesis of chiral β-hydroxy sulfonesviamanganese catalyzed asymmetric hydrogenation
Source: Royal Society of Chemistry journal article supplement (doi:10.1039/d3qo00518f), 2023-01-01
Supplement: d3qo00518f1.pdf [file d3qo00518f1.pdf]

Electronic Supplementary Material (ESI) for Org. Chem. Front.  
This journal is © The Royal Society of Chemistry 2023

## *Supporting Information*

### **Enantioselective Synthesis of Chiral $\beta$ -Hydroxy Sulfones via Manganese Catalyzed Asymmetric Hydrogenation**

Jiaying He, Wenhao Mao, Jie Lin, Yongzhen Wu, Lingxin Chen, Pengtao Yang,  
Dingguo Song, Peixi Zhu, Weihui Zhong and Fei Ling\*

College of Pharmaceutical Sciences, Zhejiang University of Technology, Hangzhou  
310014, P. R. China.

#### **Table of Contents**

|                                                                                   |      |
|-----------------------------------------------------------------------------------|------|
| 1. General experimental information                                               | S1   |
| 2. General procedure for the preparation of ligands                               | S1   |
| 3. General procedure for the preparation of substrates                            | S5   |
| 4. General procedure for the asymmetric hydrogenation of $\beta$ -keto sulfones   | S16  |
| 5. General procedure for gram-scale reaction and functional group transformations | S32  |
| 6. References                                                                     | S35  |
| 7. Copies of NMR spectra                                                          | S36  |
| 8. Copies of HPLC chart                                                           | S137 |

## 1. General experimental information

All reactions were performed in an argon-filled glovebox. Anhydrous THF and toluene were distilled from sodium benzophenoneketyl. Anhydrous MeOH, EtOH and *i*PrOH were freshly distilled from magnesium. Hydrogen gas (99.999%), Mn(CO)<sub>5</sub>Br and other chemical reagents were purchased from commercial suppliers. <sup>1</sup>H NMR (400 MHz), <sup>13</sup>C NMR (100 MHz), <sup>19</sup>F NMR (376 MHz) and <sup>31</sup>P NMR (162 MHz) spectra were recorded on a Bruker ADVANCE III instruments in CDCl<sub>3</sub> with TMS as internal standard. <sup>1</sup>H NMR chemical shifts were referenced to Deuterium chloroform signal (7.26 ppm), <sup>13</sup>C NMR chemical shifts were referenced to the solvent resonance (77.00 ppm, CDCl<sub>3</sub>). Optical rotations were determined using an AUTOPOL V polarimeter. HPLC analysis were performed using Agilent 1100 or Waters e2695 equipped with OJ-H, OD-H, AD-H and IA-H. HRMS spectra were recorded on an Agilent 1200HPLC-6210TOFMS using ESI as ion source. The conversion of starting materials was monitored by thin layer chromatography (TLC) using silica gel plates (silica gel 60 F254 0.25 mm), and components were visualized by observation under UV light (254 and 365 nm).

## 2. General procedure for the preparation of ligands

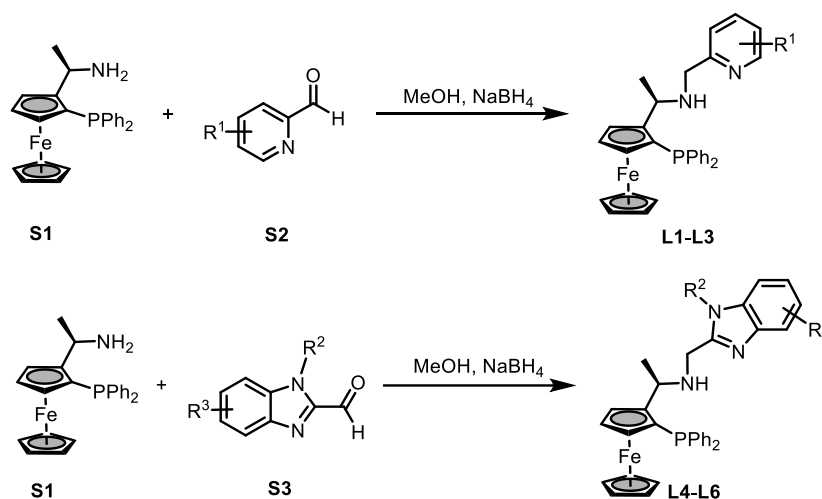

Under N<sub>2</sub> atmosphere, a solution of (*R*<sub>C</sub>, *S*<sub>FC</sub>)-**S1**<sup>[1]</sup> (1 mmol) and aldehyde **S2** or **S3**<sup>[2]</sup> (1.1 mmol) in dry MeOH (10 mL) was stirred at room temperature for 10-12 h. Then NaBH<sub>4</sub> (3 mmol) was added and the mixture was stirred at room temperature for 4 h. The solvent was removed under vacuum, and the crude product was purified by column chromatography on silica gel to get **L1-L6**, 59-64% yield.

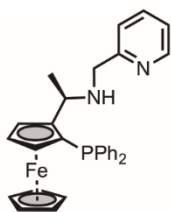

**(Rc, Sp)-N-2-Picolyl-1-(2-diphenylphosphino)ferrocenylethylamine (L1)**

Orange solid, 63% yield, m.p. 109.3-111.4 °C,  $[\alpha]_D^{20} = -121.0$  (c = 0.5, CH<sub>2</sub>Cl<sub>2</sub>). <sup>1</sup>H NMR (400 MHz, CDCl<sub>3</sub>) δ 8.37 – 8.30 (m, 1H), 7.58 – 7.50 (m, 1H), 7.41 – 7.09 (m, 10H), 7.02 – 6.92 (m, 1H), 6.55 (d, *J* = 7.6 Hz, 1H), 4.53 (s, 1H), 4.31 (s, 1H), 4.23 – 4.16 (m, 1H), 4.02 (s, 5H), 3.81 (s, 1H), 3.63 (s, 2H), 1.55 (d, *J* = 6.4 Hz, 3H). <sup>13</sup>C NMR (100 MHz, CDCl<sub>3</sub>) δ 159.8, 148.6, 140.0 (d, *J* = 9.7 Hz), 137.2 (d, *J* = 8.8 Hz), 136.0, 134.92 (d, *J* = 21.0 Hz), 132.6 (d, *J* = 14.5 Hz), 129.0, 128.20 (d, *J* = 6.3 Hz), 128.0 (d, *J* = 8.1 Hz), 128.0, 121.4 (d, *J* = 19.3 Hz), 97.7 (d, *J* = 24.1 Hz), 75.0 (d, *J* = 7.5 Hz), 71.2 (d, *J* = 4.2 Hz), 69.6, 69.4 (d, *J* = 4.1 Hz), 69.0, 52.2, 51.2 (d, *J* = 9.2 Hz), 19.4. <sup>31</sup>P NMR (162 MHz, CDCl<sub>3</sub>) δ -25.11. HRMS (ESI) calcd for C<sub>30</sub>H<sub>40</sub>FeN<sub>2</sub>P [M+H]<sup>+</sup>: 515.2273, found: 515.2275.

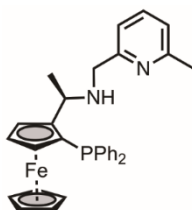

**(Rc, Sp)-N-2-(6-Methyl-picolyl)-1-(2-diphenylphosphino)ferrocenylethylamine (L2)**

Orange solid, 60% yield, m.p. 96.8-99.4 °C,  $[\alpha]_D^{20} = -132.6$  (c = 0.5, CH<sub>2</sub>Cl<sub>2</sub>). <sup>1</sup>H NMR (400 MHz, CDCl<sub>3</sub>) δ 7.60 – 7.54 (m, 2H), 7.39 (s, 3H), 7.35 – 7.06 (m, 7H), 6.86 (d, *J* = 7.6 Hz, 1H), 6.35 (d, *J* = 8.0 Hz, 1H), 4.56 (s, 1H), 4.33 (s, 1H), 4.26 – 4.21 (m, 2H), 4.04 (s, 5H), 3.84 (s, 1H), 3.64 (s, 2H), 2.43 (s, 3H), 1.58 (d, *J* = 6.4 Hz, 3H). <sup>13</sup>C NMR (100 MHz, CDCl<sub>3</sub>) δ 159.1, 157.1, 140.0 (d, *J* = 9.7 Hz), 137.2 (d, *J* = 8.9 Hz), 136.3, 134.9 (d, *J* = 21.0 Hz), 132.49 (d, *J* = 18.6 Hz), 129.0, 128.2 (d, *J* = 6.2 Hz), 128.1, 128.0 (d, *J* = 3.7 Hz), 120.8, 118.2, 97.6 (d, *J* = 24.1 Hz), 75.0 (d, *J* = 7.6 Hz), 71.2 (d, *J* = 4.3 Hz), 69.6, 69.5 (d, *J* = 4.2 Hz), 69.0, 52.1, 51.18 (d, *J* = 9.1 Hz), 24.3, 19.3. <sup>31</sup>P NMR (162 MHz, CDCl<sub>3</sub>) δ -25.11. HRMS (ESI) calcd for C<sub>31</sub>H<sub>42</sub>FeN<sub>2</sub>P [M+H]<sup>+</sup>: 529.2430, found: 529.2431.

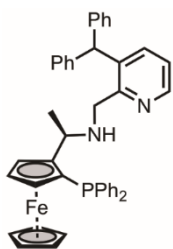

**(Rc, Sp)-N-2-(3-Diphenylmethyl-picolyl)-1-(2-diphenylphosphino)ferrocenylethylamine (L3)**

Orange solid, 61% yield, m.p. 114.3-116.7 °C,  $[\alpha]_D^{20} = +122.8$  ( $c = 0.5$ ,  $\text{CH}_2\text{Cl}_2$ ).  $^1\text{H}$  NMR (400 MHz,  $\text{CDCl}_3$ )  $\delta$  8.06 (d,  $J = 4.8$  Hz, 1H), 7.58 – 7.50 (m, 2H), 7.39 – 7.31 (m, 3H), 7.30 – 7.09 (m, 9H), 7.07 – 6.88 (m, 9H), 5.64 (s, 1H), 4.48 (s, 1H), 4.29 (s, 1H), 4.07 – 4.01 (m, 1H), 3.97 (s, 5H), 3.82 (s, 1H), 3.58 – 3.37 (m, 2H), 1.46 (d,  $J = 6.4$  Hz, 3H).  $^{13}\text{C}$  NMR (100 MHz,  $\text{CDCl}_3$ )  $\delta$  157.1, 146.5, 142.4 (d,  $J = 13.9$  Hz), 139.9 (d,  $J = 9.3$  Hz), 137.8 (d,  $J = 9.5$  Hz), 136.9, 136.6, 135.2, 135.0, 132.6, 132.4, 129.5 (d,  $J = 1.6$  Hz), 129.0, 128.4, 128.1 (d,  $J = 3.2$  Hz), 128.1 (d,  $J = 1.0$  Hz), 127.7, 126.6 (d,  $J = 1.9$  Hz), 121.1, 98.5 (d,  $J = 24.9$  Hz), 75.0 (d,  $J = 8.2$  Hz), 71.0 (d,  $J = 4.0$  Hz), 69.6, 69.4 (d,  $J = 4.3$  Hz), 69.1, 51.3, 51.2, 49.5, 20.8.  $^{31}\text{P}$  NMR (162 MHz,  $\text{CDCl}_3$ )  $\delta$  -24.52. HRMS (ESI) calcd for  $\text{C}_{42}\text{H}_{50}\text{FeN}_2\text{P}$   $[\text{M}+\text{H}]^+$ : 681.3056, found: 681.3054.

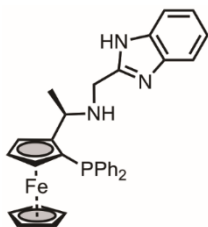

**(Rc, Sp)-N-((1H-Benzo[d]imidazol-2-yl)methyl)-1-(2-diphenylphosphino)ferrocenylethylamine (L4)**

Orange solid, 59% yield, m.p. 96.8-99.4 °C,  $[\alpha]_D^{20} = -155.8$  ( $c = 0.5$ ,  $\text{CH}_2\text{Cl}_2$ ).  $^1\text{H}$  NMR (400 MHz,  $\text{CDCl}_3$ )  $\delta$  7.65 – 7.49 (m, 3H), 7.45 – 7.26 (m, 9H), 7.18 – 7.12 (m, 2H), 4.50 (s, 1H), 4.33 (s, 1H), 4.31 – 4.25 (m,  $J = 1$  Hz), 4.03 – 3.88 (m, 8H), 1.52 (d,  $J = 6.4$  Hz, 3H).  $^{13}\text{C}$  NMR (100 MHz,  $\text{CDCl}_3$ )  $\delta$  154.2, 141.2 (d,  $J = 9.1$  Hz), 137.4 (d,  $J = 7.5$  Hz), 135.1 (d,  $J = 21.4$  Hz), 132.4 (d,  $J = 17.5$  Hz), 131.6 (d,  $J = 9.1$  Hz), 129.2, 128.3 (d,  $J = 5.9$  Hz), 128.1, 128.1, 96.9 (d,  $J = 24.1$  Hz), 75.1 (d,  $J = 7.1$  Hz), 71.7 (d,  $J = 4.9$  Hz), 69.6, 69.1, 69.0 (d,  $J = 4.4$  Hz), 51.9 (d,  $J = 7.9$  Hz), 44.6, 18.4.  $^{31}\text{P}$  NMR (162 MHz,  $\text{CDCl}_3$ )  $\delta$  -23.87. HRMS (ESI) calcd for  $\text{C}_{32}\text{H}_{41}\text{FeN}_3\text{P}$   $[\text{M}+\text{H}]^+$ : 554.2382, found: 554.2384.

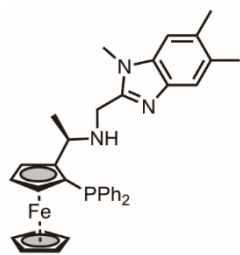

**(Rc, Sp)-N-((1,2,5,6-Tetramethyl-1H-benzo[d]imidazol-2-yl)methyl)-1-(2-diphenylphosphino)-ferrocenylethylamine (L5)**

Orange solid, 64% yield, m.p. 161.4-164.5 °C,  $[\alpha]_D^{20} = -167.2$  ( $c = 0.5$ ,  $\text{CH}_2\text{Cl}_2$ ).  $^1\text{H}$  NMR (400 MHz,  $\text{CDCl}_3$ )  $\delta$  7.58 – 7.52 (m, 2H), 7.43 (s, 1H), 7.40 – 7.34 (m, 3H), 7.22 (t,  $J = 6.8$  Hz, 2H), 7.13 (t,  $J = 8.0$  Hz, 2H), 7.10 – 7.04 (m, 1H), 6.93 (s, 1H), 4.51 (s, 1H), 4.32 (s, 1H), 4.20 – 4.15 (m, 1H), 3.97 (s, 5H), 3.87 (s, 1H), 3.76 – 3.62 (m, 2H), 3.24 (s, 3H), 2.36 (d,  $J = 4.4$  Hz, 6H), 1.54 (d,  $J = 6.4$  Hz, 3H).  $^{13}\text{C}$  NMR (100 MHz,  $\text{CDCl}_3$ )  $\delta$  152.1, 140.7, 140.23 (d,  $J = 9.8$  Hz), 137.5 (d,  $J = 8.8$  Hz), 135.0 (d,  $J = 21.2$  Hz), 134.5, 132.4 (d,  $J = 18.2$  Hz), 130.9, 130.1, 129.0, 128.1 (d,  $J = 6.0$  Hz), 128.0 (d,  $J = 8.1$  Hz), 127.80, 119.4, 109.2, 97.8 (d,  $J = 25.1$  Hz), 74.8 (d,  $J = 8.5$  Hz), 71.17 (d,  $J = 4.4$  Hz), 70.2, 69.6, 69.2, 69.1 (d,  $J = 4.3$  Hz), 51.3 (d,  $J = 9.5$  Hz), 43.8, 29.3, 20.5, 20.14 (d,  $J = 9.9$  Hz).  $^{31}\text{P}$  NMR (162 MHz,  $\text{CDCl}_3$ )  $\delta$ -24.83. HRMS (ESI) calcd for  $\text{C}_{30}\text{H}_{40}\text{FeN}_2\text{P}$   $[\text{M}+\text{H}]^+$ : 596.2852, found: 596.2850.

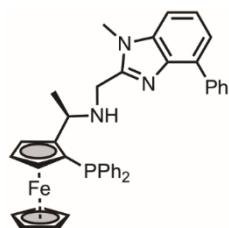

**(Rc, Sp)-N-((1,2-Dimethyl-4-phenyl-1H-benzo[d]imidazol-2-yl)methyl)-1-(2-diphenylphosphino)-ferrocenylethylamine (L6)**

Orange solid, 61% yield, m.p. 170.5-173.6 °C,  $[\alpha]_D^{20} = -162.2$  ( $c = 0.5$ ,  $\text{CH}_2\text{Cl}_2$ ).  $^1\text{H}$  NMR (400 MHz,  $\text{CDCl}_3$ )  $\delta$  8.07 (d,  $J = 7.2$  Hz, 2H), 7.61 – 7.59 (m, 2H), 7.39 (s, 5H), 7.31 (t,  $J = 7.6$  Hz, 1H), 7.23 – 7.05 (m, 6H), 4.55 (s, 1H), 4.38 – 4.27 (m, 2H), 4.02 (s, 5H), 3.91 (s, 1H), 3.88 – 3.75 (m, 2H), 3.38 (s, 3H), 1.63 (d,  $J = 6.4$  Hz, 3H).  $^{13}\text{C}$  NMR (100 MHz,  $\text{CDCl}_3$ )  $\delta$  152.9, 140.21 (d,  $J = 9.5$  Hz), 140.0, 138.7, 137.5 (d,  $J = 8.8$  Hz), 136.7, 135.0 (d,  $J = 21.6$  Hz), 132.3, 132.1, 132.0, 129.1, 129.1 (d,  $J = 15.5$  Hz), 128.3, 128.0, 128.0, 128.0, 127.9, 127.7, 127.0, 122.1, 120.9, 108.0, 97.7 (d,  $J = 25.1$  Hz), 74.8 (d,  $J = 25.1$  Hz), 71.2 (d,  $J = 8.6$  Hz), 69.6, 69.2, 69.1 (d,  $J = 4.3$  Hz), 51.2, 43.5,

29.5, 19.8.  $^{31}\text{P}$  NMR (162 MHz,  $\text{CDCl}_3$ )  $\delta$ -24.83. HRMS (ESI) calcd for  $\text{C}_{39}\text{H}_{47}\text{FeN}_3\text{P}$   $[\text{M}+\text{H}]^+$ : 664.2852, found: 664.2851.

### 3. General procedure for the preparation of substrates

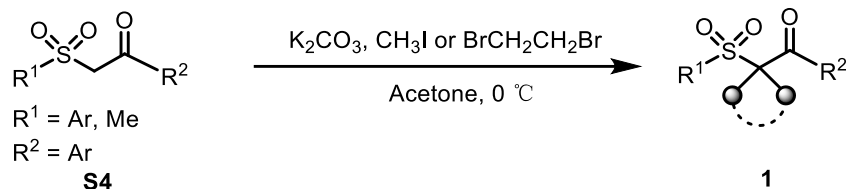

Under  $\text{N}_2$  atmosphere, a solution of **S4** (5 mmol), potassium carbonate (15 mmol), and  $\text{CH}_3\text{I}$  (15 mmol) in acetone (15 mL) was stirred in room temperature overnight. Filtered to remove solids and concentrated solution. 20 mL water and 15 mL DCM were added, organic layer was combined and dried by anhydrous sodium sulfate. The reaction mixture was filtered and concentrated to get the crude product **1**. Crude product **1** was purified by column chromatography on silica gel to get white solid.

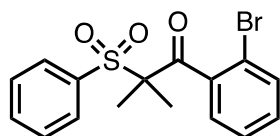

#### 1-(2-Bromophenyl)-2-methyl-2-(phenylsulfonyl)propan-1-one (**1a**):

White solid, 78% yield, m.p. 119.3-122.6  $^\circ\text{C}$ .  $^1\text{H}$  NMR (400 MHz,  $\text{CDCl}_3$ )  $\delta$  7.87 (d,  $J = 8.0$  Hz, 2H), 7.76 – 7.70 (m, 2H), 7.61 – 7.54 (m, 3H), 7.42 (t,  $J = 7.2$  Hz, 1H), 7.29 (t,  $J = 7.6$  Hz, 1H), 1.66 (s, 6H).  $^{13}\text{C}$  NMR (100 MHz,  $\text{CDCl}_3$ )  $\delta$  201.9, 141.5, 135.1, 134.3, 123.7, 131.0, 130.9, 128.7, 127.4, 127.0, 117.5, 72.7, 21.2. HRMS (ESI) calcd for  $\text{C}_{16}\text{H}_{16}\text{BrO}_3\text{S}$   $[\text{M}+\text{H}]^+$ : 366.9998, found: 368.9999.

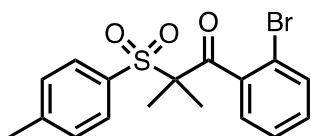

#### 1-(2-Bromophenyl)-2-methyl-2-(4-methylphenylsulfonyl)propan-1-one (**1b**):

White solid, 72% yield, m.p. 116.8-119.9  $^\circ\text{C}$ .  $^1\text{H}$  NMR (400 MHz,  $\text{CDCl}_3$ )  $\delta$  7.79 – 7.71 (m, 3H), 7.55 (dd,  $J = 8.4, 0.8$  Hz, 1H), 7.44 – 7.35 (m, 3H), 7.28 (td,  $J = 8.0, 1.6$  Hz, 1H), 2.47 (s, 3H), 1.65 (s, 6H).  $^{13}\text{C}$  NMR (100 MHz,  $\text{CDCl}_3$ )  $\delta$  202.1, 145.5, 141.4, 132.6, 131.9, 130.9, 130.8, 129.4, 127.3, 127.0, 117.5, 21.8, 21.2. HRMS (ESI) calcd for  $\text{C}_{17}\text{H}_{18}\text{BrO}_3\text{S}$   $[\text{M}+\text{H}]^+$ : 381.0155, found: 381.0156.

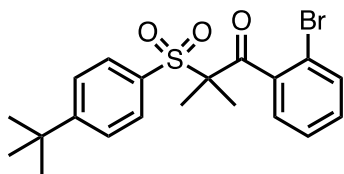

**1-(2-Bromophenyl)-2-((4-(tert-butyl)phenyl)sulfonyl)-2-methylpropan-1-one (1c):**

White solid, 62% yield, m.p. 132.1-135.4 °C. <sup>1</sup>H NMR (400 MHz, CDCl<sub>3</sub>) δ 7.80 – 7.76 (m, 2H), 7.72 (dd, *J* = 7.6, 1.6 Hz, 1H), 7.60 – 7.54 (m, 3H), 7.40 (td, *J* = 7.6, 0.8 Hz, 1H), 7.28 (td, *J* = 8.0, 2.0 Hz, 1H), 1.66 (s, 6H), 1.37 (s, 9H). <sup>13</sup>C NMR (100 MHz, CDCl<sub>3</sub>) δ 202.1, 158.2, 141.4, 132.5, 131.9, 130.7, 127.3, 126.9, 125.7, 117.4, 72.5, 35.3, 31.1, 21.2. HRMS (ESI) calcd for C<sub>20</sub>H<sub>24</sub>BrO<sub>3</sub>S [M+H]<sup>+</sup>: 423.0624, found: 423.0624.

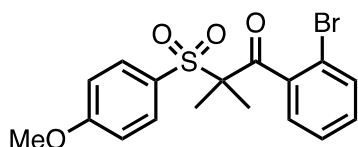

**1-(2-Bromophenyl)-2-((4-methoxyphenyl)sulfonyl)-2-methylpropan-1-one (1d):**

White solid, 73% yield, m.p. 85.4-88.1 °C. <sup>1</sup>H NMR (400 MHz, CDCl<sub>3</sub>) δ 7.80 – 7.75 (m, 3H), 7.55 (d, *J* = 8.0 Hz, 1H), 7.41 (td, *J* = 7.6, 1.2 Hz, 1H), 7.28 (td, *J* = 8.0, 1.6 Hz, 1H), 7.01 (m, 2H), 3.90 (s, 3H), 1.64 (s, 6H). <sup>13</sup>C NMR (100 MHz, CDCl<sub>3</sub>) δ 202.2, 164.3, 141.5, 133.0, 132.6, 130.8, 127.3, 127.0, 126.3, 117.5, 114.0, 72.6, 55.7, 21.3. HRMS (ESI) calcd for C<sub>17</sub>H<sub>18</sub>BrO<sub>3</sub>S [M+H]<sup>+</sup>: 397.0104, found: 397.0102.

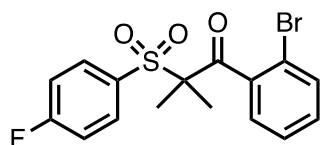

**1-(2-Bromophenyl)-2-((4-fluorophenyl)sulfonyl)-2-methylpropan-1-one (1e):**

White solid, 70% yield, m.p. 115.9-118.9 °C. <sup>1</sup>H NMR (400 MHz, CDCl<sub>3</sub>) δ 7.90 – 7.85 (m, 2H), 7.74 (dd, *J* = 7.6, 1.6 Hz, 1H), 7.56 (d, *J* = 8.0 Hz, 1H), 7.42 (td, *J* = 7.6, 0.8 Hz, 1H), 7.33 – 7.24 (m, 3H), 1.65 (s, 6H). <sup>13</sup>C NMR (100 MHz, CDCl<sub>3</sub>) δ 202.2, 166.4 (d, *J* = 256 Hz), 141.2, 133.8 (d, *J* = 10 Hz), 132.7, 131.0, 130.9 (d, *J* = 3 Hz), 127.4, 126.9, 117.4, 116.1 (d, *J* = 23 Hz), 72.7, 21.2. <sup>19</sup>F NMR (376 MHz, CDCl<sub>3</sub>) δ -102.50. HRMS (ESI) calcd for C<sub>16</sub>H<sub>15</sub>BrFO<sub>3</sub>S [M+H]<sup>+</sup>: 384.9904, found: 384.9906.

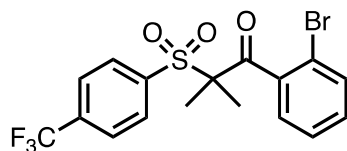

**1-(2-Bromophenyl)-2-methyl-2-((4-(trifluoromethyl)phenyl)sulfonyl)propan-1-one (1f):**

White solid, 69% yield, m.p. 126.4-129.0 °C. <sup>1</sup>H NMR (400 MHz, CDCl<sub>3</sub>) δ 8.00 (d, *J* = 8.0 Hz, 2H), 7.85 (d, *J* = 8.4 Hz, 2H), 7.73 (dd, *J* = 7.6, 1.6 Hz, 1H), 7.57 (dd, *J* = 8.0, 0.8 Hz, 1H), 7.44 (td, *J* = 7.6, 1.2 Hz, 1H), 7.31 (td, *J* = 7.6, 1.6 Hz, 1H), 1.68 (s, 6H). <sup>13</sup>C NMR (100 MHz, CDCl<sub>3</sub>) δ 201.9, 141.1, 138.8, 135.8(q, *J* = 33.0 Hz), 132.7, 131.6, 131.0, 127.4, 126.8, 125.7 (q, *J* = 3.7 Hz), 123.2 (d, *J* = 271.5 Hz), 73.0, 21.1. <sup>19</sup>F NMR (376 MHz, CDCl<sub>3</sub>) δ -62.22. HRMS (ESI) calcd for C<sub>17</sub>H<sub>15</sub>BrF<sub>3</sub>O<sub>3</sub>S [M+H]<sup>+</sup>: 434.9872, found: 434.9870.

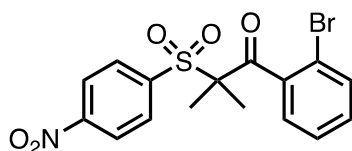

**1-(2-Bromophenyl)-2-methyl-2-((4-nitrophenyl)sulfonyl)propan-1-one (1g):**

White solid, 75% yield, m.p. 110.0-112.8 °C. <sup>1</sup>H NMR (400 MHz, CDCl<sub>3</sub>) δ 8.41 (dd, *J* = 9.2, 3.2 Hz, 2H), 8.09 – 8.03 (m, 2H), 7.73 – 7.68 (m, 1H), 7.60 – 7.54 (m, 1H), 7.47 – 7.42 (m, 1H), 7.35 – 7.29 (m, 1H), 1.69 (s, 6H). <sup>13</sup>C NMR (100 MHz, CDCl<sub>3</sub>) δ 202.0, 151.2, 141.0, 140.9, 132.8, 132.4, 131.2, 127.5, 126.8, 123.7, 117.3, 73.3, 21.2. HRMS (ESI) calcd for C<sub>16</sub>H<sub>15</sub>BrNO<sub>5</sub>S [M+H]<sup>+</sup>: 411.9849, found: 411.9050.

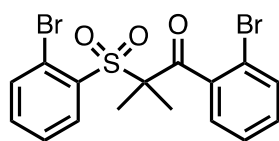

**1-(2-Bromophenyl)-2-((2-bromophenyl)sulfonyl)-2-methylpropan-1-one (1h):**

White solid, 71% yield, m.p. 77.8-81.1 °C. <sup>1</sup>H NMR (400 MHz, CDCl<sub>3</sub>) δ 8.03 (d, *J* = 7.2 Hz, 1H), 7.89 (d, *J* = 7.6 Hz, 1H), 7.81 (d, *J* = 7.2 Hz, 1H), 7.61 – 7.46 (m, 3H), 7.43 (t, *J* = 7.2 Hz, 1H), 7.30 (t, *J* = 7.6 Hz, 1H), 1.73 (s, 6H). <sup>13</sup>C NMR (100 MHz, CDCl<sub>3</sub>) δ 201.3, 141.1, 136.4, 135.6, 135.1, 134.6, 132.7, 131.0, 127.6, 127.3, 127.1, 123.2, 117.6, 74.4, 21.4. HRMS (ESI) calcd for C<sub>16</sub>H<sub>15</sub>Br<sub>2</sub>O<sub>3</sub>S [M+H]<sup>+</sup>: 446.9103, found: 446.9104.



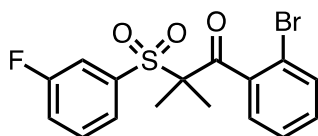

**1-(2-Bromophenyl)-2-((3-fluorophenyl)sulfonyl)-2-methylpropan-1-one (1i):**

White solid, 65% yield, m.p. 94.8-98.5 °C. <sup>1</sup>H NMR (400 MHz, CDCl<sub>3</sub>) δ 7.72 (dd, *J* = 7.6, 1.6 Hz, 1H), 7.67 (dt, *J* = 8.0, 1.2 Hz, 1H), 7.61 – 7.53 (m, 3H), 7.45 – 7.39 (m, 2H), 7.30 (td, *J* = 8.0, 1.6 Hz, 1H), 1.67 (s, 6H). <sup>13</sup>C NMR (100 MHz, CDCl<sub>3</sub>) δ 201.7, 162.1(d, *J* = 250.3 Hz), 141.2, 137.1 (d, *J* = 6.6 Hz), 132.7, 131.0, 130.3 (d, *J* = 7.5 Hz), 127.4, 126.9, 126.8 (d, *J* = 3.3 Hz), 121.6 (d, *J* = 21.1 Hz), 118.2 (d, *J* = 24.4 Hz), 117.4, 73.0, 21.2. <sup>19</sup>F NMR (376 MHz, CDCl<sub>3</sub>) δ -109.89. HRMS (ESI) calcd for C<sub>16</sub>H<sub>15</sub>BrFO<sub>3</sub>S [M+H]<sup>+</sup>: 384.9904, found: 384.9905.

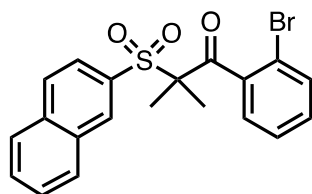

**1-(2-Bromophenyl)-2-methyl-2-(naphthalen-2-ylsulfonyl)propan-1-one (1j):**

White solid, 62% yield, m.p. 98.1-101.7 °C. <sup>1</sup>H NMR (400 MHz, CDCl<sub>3</sub>) δ 8.45 (s, 1H), 8.01 (dd, *J* = 8.0, 2.4 Hz, 2H), 7.95 (d, *J* = 8.0 Hz, 1H), 7.87 – 7.81 (m, 2H), 7.71 – 7.66 (m, 1H), 7.65 – 7.60 (m, 1H), 7.55 (d, *J* = 8.0 Hz, 1H), 7.44 (t, *J* = 7.2 Hz, 1H), 7.30 (td, *J* = 8.0, 1.6 Hz, 1H), 1.70 (s, 6H). <sup>13</sup>C NMR (100 MHz, CDCl<sub>3</sub>) δ 202.0, 141.4, 135.6, 133.1, 132.6, 132.1, 131.9, 130.9, 129.7, 129.6, 128.6, 128.0, 127.6, 127.4, 127.0, 125.4, 117.5, 729, 21.4. HRMS (ESI) calcd for C<sub>20</sub>H<sub>18</sub>BrO<sub>3</sub>S [M+H]<sup>+</sup>: 417.0155, found: 417.0154.

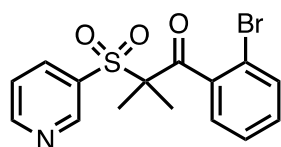

**1-(2-Bromophenyl)-2-methyl-2-(pyridin-3-ylsulfonyl)propan-1-one (1k):**

White solid, 60% yield, m.p. 84.1-86.3 °C. <sup>1</sup>H NMR (400 MHz, CDCl<sub>3</sub>) δ 9.04 (d, *J* = 2.0 Hz, 1H), 8.90 (dd, *J* = 5.2, 1.6 Hz, 1H), 8.13 (dt, *J* = 8.0, 2.0 Hz, 1H), 7.70 (dd, *J* = 7.6, 1.6 Hz, 1H), 7.57 – 7.51 (m, 2H), 7.43 (td, *J* = 7.6, 1.2 Hz, 1H), 7.30 (td, *J* = 7.6, 1.6 Hz, 1H), 1.68 (s, 6H). <sup>13</sup>C NMR (100 MHz, CDCl<sub>3</sub>) δ 202.2, 154.5, 151.1, 140.0,

137.8, 132.7, 131.9, 131.1, 127.5, 126.9, 123.4, 117.2, 72.9, 21.0. HRMS (ESI) calcd for C<sub>15</sub>H<sub>15</sub>BrNO<sub>3</sub>S [M+H]<sup>+</sup>: 367.9961, found: 369.9950.

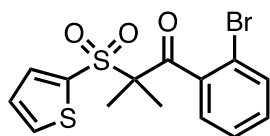

**1-(2-Bromophenyl)-2-methyl-2-(thiophen-2-ylsulfonyl)propan-1-one (1l):**

White solid, 65% yield, m.p. 115.9-119.2 °C. <sup>1</sup>H NMR (400 MHz, CDCl<sub>3</sub>) δ 7.83 (dd, *J* = 5.2, 1.6 Hz, 1H), 7.69 (dd, *J* = 3.6, 1.2 Hz, 1H), 7.66 (dd, *J* = 7.6, 1.6 Hz, 1H), 7.55 (dd, *J* = 8.0, 0.8 Hz, 1H), 7.40 (td, *J* = 7.6, 1.2 Hz, 1H), 7.28 (td, *J* = 7.6, 1.6 Hz, 1H), 7.21 (dd, *J* = 4.8, 3.6 Hz, 1H), 1.71 (s, 6H). <sup>13</sup>C NMR (100 MHz, CDCl<sub>3</sub>) δ 201.6, 141.3, 137.2, 135.6, 135.5, 132.6, 130.9, 127.8, 127.4, 127.0, 117.5, 73.2, 21.3. HRMS (ESI) calcd for C<sub>14</sub>H<sub>14</sub>BrO<sub>3</sub>S<sub>2</sub> [M+H]<sup>+</sup>: 372.9562, found: 372.9566.

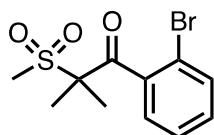

**1-(2-Bromophenyl)-2-methyl-2-(methylsulfonyl)propan-1-one (1m):**

White solid, 88% yield, m.p. 88.6-91.4 °C. <sup>1</sup>H NMR (400 MHz, CDCl<sub>3</sub>) δ 7.57 (t, *J* = 8.4 Hz, 2H), 7.40 (t, *J* = 7.6 Hz, 1H), 7.31 (t, *J* = 7.6 Hz, 1H), 3.13 (s, 3H), 1.73 (s, 6H). <sup>13</sup>C NMR (100 MHz, CDCl<sub>3</sub>) δ 203.9, 141.1, 132.5, 131.0, 127.5, 127.0, 117.0, 71.4, 36.5, 20.2. HRMS (ESI) calcd for C<sub>11</sub>H<sub>14</sub>BrO<sub>3</sub>S [M+H]<sup>+</sup>: 304.9842, found: 304.9844.

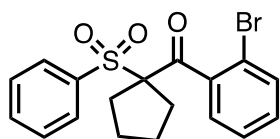

**(2-Bromophenyl)(1-(phenylsulfonyl)cyclopentyl)methanone (1n):**

White solid, 42% yield, m.p. 152.8-156.5 °C. <sup>1</sup>H NMR (400 MHz, CDCl<sub>3</sub>) δ 8.03 (dd, *J* = 7.6, 1.2 Hz, 1H), 7.85 (d, *J* = 7.2 Hz, 2H), 7.70 (t, *J* = 7.6 Hz, 1H), 7.62–7.53 (m, 3H), 7.42 (t, *J* = 7.6 Hz, 1H), 7.30 (td, *J* = 8.0, 1.6 Hz, 1H), 2.65–2.50 (m, 2H), 2.35–2.18 (m, 2H), 1.94–1.80 (m, 2H), 1.76–1.64 (m, 2H). <sup>13</sup>C NMR (100 MHz, CDCl<sub>3</sub>) δ 201.9, 140.4, 135.8, 134.2, 133.2, 131.2, 130.7, 128.7, 127.5, 127.2, 118.9, 84.0, 34.4, 25.9. HRMS (ESI) calcd for C<sub>18</sub>H<sub>18</sub>BrO<sub>3</sub>S [M+H]<sup>+</sup>: 393.0155, found: 393.0153.

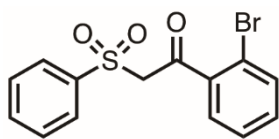

**1-(2-Bromophenyl)-2-(phenylsulfonyl)ethan-1-one (1o)<sup>[3]</sup>:**

White solid, m.p. 77.2-80.3 °C. <sup>1</sup>H NMR (400 MHz, CDCl<sub>3</sub>) δ 7.88 (d, *J* = 7.6 Hz, 2H), 7.65 (t, *J* = 7.2 Hz, 1H), 7.58 – 7.43 (m, 4H), 7.40 – 7.30(m, 2H), 4.82 (s, 2H). <sup>13</sup>C NMR (100 MHz, CDCl<sub>3</sub>) δ 190.9, 139.4, 138.8, 134.3, 133.9, 133.0, 130.4, 129.3, 128.5, 127.8, 119.4, 60.0. HRMS (ESI) calcd for C<sub>14</sub>H<sub>12</sub>BrO<sub>3</sub>S [M+H]<sup>+</sup>: 338.9685, found: 338.9687.

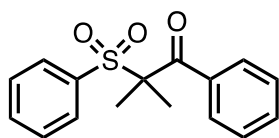

**2-Methyl-1-phenyl-2-(phenylsulfonyl)propan-1-one (1p):**

White solid, 79% yield, m.p. 71.9-73.9 °C. <sup>1</sup>H NMR (400 MHz, CDCl<sub>3</sub>) δ 7.95 – 7.90 (m, 2H), 7.82 – 7.77 (m, 2H), 7.66 (t, *J* = 7.6 Hz, 1H), 7.52 (t, *J* = 7.6 Hz, 3H), 7.43 (t, *J* = 7.6 Hz, 2H), 1.70 (s, 6H). <sup>13</sup>C NMR (100 MHz, CDCl<sub>3</sub>) δ 199.2, 137.6, 135.1, 134.1, 132.0, 130.4, 128.7, 128.6, 128.1, 73.3, 22.5. HRMS (ESI) calcd for C<sub>16</sub>H<sub>17</sub>O<sub>3</sub>S [M+H]<sup>+</sup>: 289.3683, found: 289.3685.

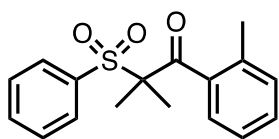

**2-Methyl-2-(phenylsulfonyl)-1-(o-tolyl)propan-1-one (1q):**

White solid, 80% yield, m.p. 77.6-79.6 °C. <sup>1</sup>H NMR (400 MHz, CDCl<sub>3</sub>) δ 7.91 – 7.85 (m, 2H), 7.75 – 7.66 (m, 2H), 7.60 – 7.54 (m, 2H), 7.31 (td, *J* = 7.6, 1.6 Hz, 1H), 7.26 – 7.19 (m, 2H), 2.16 (s, 3H), 1.62 (s, 6H). <sup>13</sup>C NMR (100 MHz, CDCl<sub>3</sub>) δ 203.7, 138.8, 135.4, 134.4, 134.1, 130.8, 130.8, 129.8, 128.5, 125.2, 125.2, 72.9, 22.0, 19.6. HRMS (ESI) calcd for C<sub>17</sub>H<sub>19</sub>O<sub>3</sub>S [M+H]<sup>+</sup>: 303.1049, found: 303.1048.

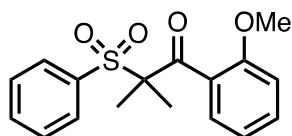

**1-(2-Methoxyphenyl)-2-methyl-2-(phenylsulfonyl)propan-1-one (1r):**

White solid, 72% yield, m.p. 94.0-96.3 °C. <sup>1</sup>H NMR (400 MHz, CDCl<sub>3</sub>) δ 8.10 – 8.02 (m, 2H), 7.80 – 7.73 (m, 2H), 7.66 – 7.60 (m, 1H), 7.53 – 7.46 (m, 2H), 6.97 – 6.88 (m, 2H), 3.86 (s, 3H), 1.72 (s, 6H). <sup>13</sup>C NMR (100 MHz, CDCl<sub>3</sub>) δ 196.2, 163.0, 135.5, 134.0, 132.1, 130.3, 129.8, 128.7, 113.4, 73.7, 55.5, 22.8. HRMS (ESI) calcd for C<sub>17</sub>H<sub>19</sub>O<sub>4</sub>S [M+H]<sup>+</sup>: 319.0999, found: 319.0997.

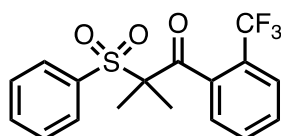

**2-Methyl-2-(phenylsulfonyl)-1-(2-(trifluoromethyl)phenyl)propan-1-one (1s):**

White solid, 73% yield, m.p. 133.0-135.9 °C. <sup>1</sup>H NMR (400 MHz, CDCl<sub>3</sub>) δ 8.03 (d, *J* = 8.0 Hz, 2H), 7.79 (dd, *J* = 8.0, 0.8 Hz, 2H), 7.73 – 7.66 (m, 3H), 7.55 (t, *J* = 8.0 Hz, 2H), 1.68 (s, 6H). <sup>13</sup>C NMR (100 MHz, CDCl<sub>3</sub>) δ 198.8, 140.8, 134.9, 134.4, 133.4(q, *J* = 33 Hz), 130.5, 129.0, 128.8, 125.3(q, *J* = 3.6 Hz), 125.5(q, *J* = 271 Hz), 73.3, 22.4. <sup>19</sup>F NMR (376 MHz, CDCl<sub>3</sub>) δ -62.16. HRMS (ESI) calcd for C<sub>17</sub>H<sub>16</sub>F<sub>3</sub>O<sub>3</sub>S [M+H]<sup>+</sup>: 357.0767, found: 357.0766.

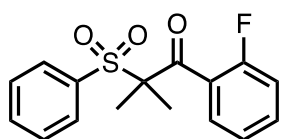

**1-(2-Fluorophenyl)-2-methyl-2-(phenylsulfonyl)propan-1-one (1t):**

White solid, 72% yield, m.p. 70.9-73.2 °C. <sup>1</sup>H NMR (400 MHz, CDCl<sub>3</sub>) δ 7.87 (d, *J* = 7.6 Hz, 2H), 7.70 (t, *J* = 7.2 Hz, 1H), 7.63 – 7.53 (m, 3H), 7.46 - 7.38 (m, 1H), 7.21 (t, *J* = 7.6 Hz, 1H), 7.08 (t, *J* = 8.8 Hz, 1H), 1.64 (s, 6H). <sup>13</sup>C NMR (100 MHz, CDCl<sub>3</sub>) δ 199.9, 158.1 (d, *J* = 246 Hz), 135.3, 134.3, 132.0 (d, *J* = 8 Hz), 130.8, 128.7, 128.0 (d, *J* = 3 Hz), 127.8 (d, *J* = 17 Hz), 124.2 (d, *J* = 3 Hz), 115.8 (d, *J* = 21 Hz), 73.2, 20.8. <sup>19</sup>F NMR (376 MHz, CDCl<sub>3</sub>) δ -114.30. HRMS (ESI) calcd for C<sub>16</sub>H<sub>16</sub>FO<sub>3</sub>S [M+H]<sup>+</sup>: 307.0799, found: 307.0797.

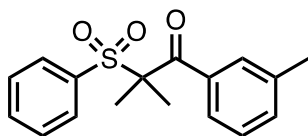

**2-Methyl-2-(phenylsulfonyl)-1-(m-tolyl)propan-1-one (1u):**

White solid, 67% yield, m.p. 80.4-82.7 °C. <sup>1</sup>H NMR (400 MHz, CDCl<sub>3</sub>) δ 7.82 – 7.76 (m, 2H), 7.76 – 7.71 (m, 1H), 7.67 – 7.60 (m, 2H), 7.54 – 7.47 (m, 2H), 7.34 – 7.27 (m, 2H), 2.37 (s, 3H), 1.69 (s, 6H). <sup>13</sup>C NMR (100 MHz, CDCl<sub>3</sub>) δ 199.5, 148.0, 137.9, 135.4, 134.1, 132.7, 130.5, 129.2, 128.7, 128.0, 125.8, 73.4, 22.6, 21.4. HRMS (ESI) calcd for C<sub>17</sub>H<sub>19</sub>O<sub>3</sub>S [M+H]<sup>+</sup>: 303.1049, found: 303.1051.

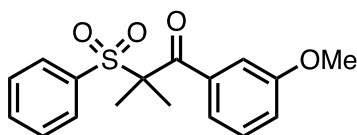

**1-(3-Methoxyphenyl)-2-methyl-2-(phenylsulfonyl)propan-1-one (1v):**

White solid, 71% yield, m.p. 62.3-64.7 °C. <sup>1</sup>H NMR (400 MHz, CDCl<sub>3</sub>) δ 7.82 – 7.77 (m, 2H), 7.69 – 7.63 (m, 1H), 7.55 – 7.49 (m, 3H), 7.44 (t, *J* = 2.0 Hz, 1H), 7.34 (t, *J* = 8.0 Hz, 1H), 7.06 (dd, *J* = 8.4, 2.8 Hz, 1H), 3.83 (s, 3H), 1.69 (s, 6H). <sup>13</sup>C NMR (100 MHz, CDCl<sub>3</sub>) δ 199.1, 159.4, 139.0, 135.3, 134.1, 130.5, 129.3, 128.7, 121.1, 118.3, 113.6, 73.5, 55.4, 22.6. HRMS (ESI) calcd for C<sub>17</sub>H<sub>19</sub>O<sub>4</sub>S [M+H]<sup>+</sup>: 319.0999, found: 319.0998.

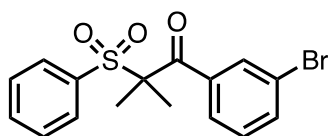

**1-(3-Bromophenyl)-2-methyl-2-(phenylsulfonyl)propan-1-one (1w):**

White solid, 65% yield, m.p. 77.3-79.6 °C. <sup>1</sup>H NMR (400 MHz, CDCl<sub>3</sub>) δ 7.97 – 7.92 (m, 2H), 7.81 – 7.76 (m, 2H), 7.70 – 7.63 (m, 2H), 7.57 – 7.51 (m, 2H), 7.32 (t, *J* = 8.0 Hz, 1H), 1.68 (s, 6H). <sup>13</sup>C NMR (100 MHz, CDCl<sub>3</sub>) δ 198.0, 139.3, 135.0, 134.9, 134.3, 131.6, 130.4, 129.7, 128.7, 127.2, 122.4, 73.3, 22.5. HRMS (ESI) calcd for C<sub>16</sub>H<sub>16</sub>BrO<sub>3</sub>S [M+H]<sup>+</sup>: 366.9998, found: 366.9996.

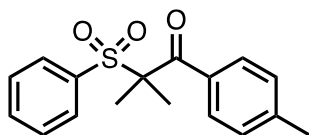

**2-Methyl-2-(phenylsulfonyl)-1-(p-tolyl)propan-1-one (1x):**

White solid, 66% yield, m.p. 83.5-86.7 °C. <sup>1</sup>H NMR (400 MHz, CDCl<sub>3</sub>) δ 7.87 (dd, *J* = 8.0, 1.2 Hz, 2H), 7.80 – 7.75 (m, 2H), 7.67 – 7.62 (m, 1H), 7.53 – 7.48 (m, 2H), 7.25 – 7.20 (m, 2H), 2.40 (s, 3H), 1.70 (s, 6H). <sup>13</sup>C NMR (100 MHz, CDCl<sub>3</sub>) δ 198.3, 142.9, 135.5, 134.9, 134.1, 130.4, 129.3, 128.9, 128.7, 22.7, 21.5. HRMS (ESI) calcd for C<sub>17</sub>H<sub>19</sub>O<sub>3</sub>S [M+H]<sup>+</sup>: 303.1049, found: 303.1051.

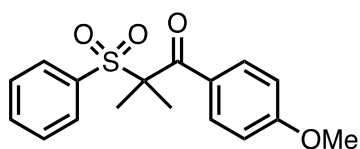

**1-(4-Methoxyphenyl)-2-methyl-2-(phenylsulfonyl)propan-1-one (1y):**

White solid, 78% yield, m.p. 99.9-102.5 °C. <sup>1</sup>H NMR (400 MHz, CDCl<sub>3</sub>) δ 8.10 – 8.02 (m, 2H), 7.80 – 7.73 (m, 2H), 7.66 – 7.60 (m, 1H), 7.53 – 7.46 (m, 2H), 6.97 – 6.88 (m, 2H), 3.86 (s, 3H), 1.72 (s, 6H). <sup>13</sup>C NMR (100 MHz, CDCl<sub>3</sub>) δ 196.2, 163.0, 135.5, 134.0, 132.1, 130.3, 129.8, 128.7, 113.4, 73.7, 55.5, 22.8. HRMS (ESI) calcd for C<sub>17</sub>H<sub>19</sub>O<sub>4</sub>S [M+H]<sup>+</sup>: 319.0999, found: 319.0997.

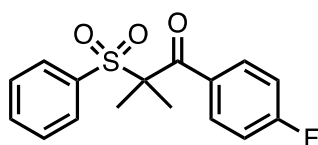

**1-(4-Fluorophenyl)-2-methyl-2-(phenylsulfonyl)propan-1-one (1z):**

White solid, 75% yield, m.p. 108.2-111.5 °C. <sup>1</sup>H NMR (400 MHz, CDCl<sub>3</sub>) δ 8.06 – 8.01 (m, 2H), 7.79 – 7.74 (m, 2H), 7.68 – 7.63 (m, 1H), 7.55 – 7.49 (m, 2H), 7.14 – 8.01 (m, 2H), 1.68 (s, 6H). <sup>13</sup>C NMR (100 MHz, CDCl<sub>3</sub>) δ 197.2, 165.05 (d, *J* = 253 Hz), 135.2, 134.2, 133.7 (d, *J* = 3 Hz), 132.0 (d, *J* = 9 Hz), 130.4, 128.7, 115.3 (d, *J* = 22 Hz), 73.5, 22.7. <sup>19</sup>F NMR (376 MHz, CDCl<sub>3</sub>) δ -105.91. HRMS (ESI) calcd for C<sub>16</sub>H<sub>16</sub>FO<sub>3</sub>S [M+H]<sup>+</sup>: 307.0799, found: 307.0801.

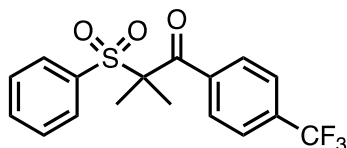

**2-Methyl-2-(phenylsulfonyl)-1-(4-(trifluoromethyl)phenyl)propan-1-one (1aa):**

White solid, 73% yield, m.p. 108.2-111.5 °C. <sup>1</sup>H NMR (400 MHz, CDCl<sub>3</sub>) δ 8.03 (d, *J* = 8.0 Hz, 2H), 7.79 (dd, *J* = 8.0, 0.8 Hz, 2H), 7.73 – 7.66 (m, 3H), 7.55 (t, *J* = 8.0 Hz, 2H), 1.68 (s, 6H). <sup>13</sup>C NMR (100 MHz, CDCl<sub>3</sub>) δ 198.8, 140.8, 134.9, 134.4, 133.4(q, *J* = 33 Hz), 130.5, 129.0, 128.8, 125.3(q, *J* = 3.6 Hz), 125.5(q, *J* = 271 Hz), 73.3, 22.4. <sup>19</sup>F NMR (376 MHz, CDCl<sub>3</sub>) δ -62.16. HRMS (ESI) calcd for C<sub>17</sub>H<sub>16</sub>F<sub>3</sub>O<sub>3</sub>S [M+H]<sup>+</sup>: 357.0767, found: 357.0766.

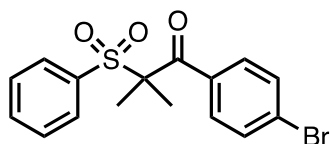

**1-(4-Bromophenyl)-2-methyl-2-(phenylsulfonyl)propan-1-one (1ab):**

White solid, 74% yield, m.p. 122.8-125.0 °C. <sup>1</sup>H NMR (400 MHz, CDCl<sub>3</sub>) δ 7.85 (d, *J* = 8.4 Hz, 2H), 7.77 (d, *J* = 7.2 Hz, 2H), 7.67 (t, *J* = 7.6 Hz, 1H), 7.58 (d, *J* = 8.4 Hz, 2H), 7.53 (t, *J* = 8.0 Hz, 2H), 1.67 (s, 3H). <sup>13</sup>C NMR (100 MHz, CDCl<sub>3</sub>) δ 198.0, 136.3, 135.1, 134.3, 131.5, 130.7, 130.4, 128.8, 127.3, 73.4, 22.6. HRMS (ESI) calcd for C<sub>16</sub>H<sub>16</sub>BrO<sub>3</sub>S [M+H]<sup>+</sup>: 366.9998, found: 367.0000.

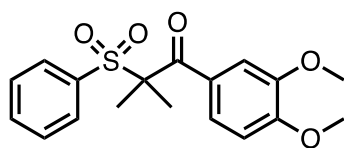

**1-(3,4-Dimethoxyphenyl)-2-methyl-2-(phenylsulfonyl)propan-1-one (1ac):**

White solid, 67% yield, m.p. 138.0-140.6 °C. <sup>1</sup>H NMR (400 MHz, CDCl<sub>3</sub>) δ 7.86 – 7.80 (m, 1H), 7.68 – 7.59 (m, 2H), 7.54 – 7.46 (m, 2H), 7.54 – 7.46 (m, 2H), 6.92 – 6.87 (m, 1H), 3.92 (dd, *J* = 10.4, 2.0 Hz, 6H), 1.72 (s, 6H). <sup>13</sup>C NMR (100 MHz, CDCl<sub>3</sub>) δ 195.9, 152.7, 148.3, 135.2, 134.0, 130.1, 129.5, 129.5, 128.6, 124.3, 112.5, 109.8, 73.7, 55.9, 22.9. HRMS (ESI) calcd for C<sub>18</sub>H<sub>21</sub>O<sub>5</sub>S [M+H]<sup>+</sup>: 349.1104, found: 349.1106.

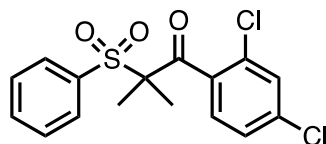

**1-(2,4-Dichlorophenyl)-2-methyl-2-(phenylsulfonyl)propan-1-one (1ad) :**

White solid, 62% yield, m.p. 95.8-99.5 °C. <sup>1</sup>H NMR (400 MHz, CDCl<sub>3</sub>) δ 7.87 – 7.82 (m, 2H), 7.74 – 7.69 (m, 2H), 7.61 – 7.56 (m, 2H), 7.41 (d, *J* = 1.6 Hz, 1H), 7.35 (dd, *J* = 8.4, Hz, 1H), 1.61 (s, 6H). <sup>13</sup>C NMR (100 MHz, CDCl<sub>3</sub>) δ 200.6, 137.6, 136.2, 134.9, 134.4, 130.9, 130.1, 129.5, 128.7, 127.9, 127.3, 72.9, 21.0. HRMS (ESI) calcd for C<sub>16</sub>H<sub>15</sub>Cl<sub>2</sub>O<sub>3</sub>S [M+H]<sup>+</sup>: 357.0113, found: 357.0110.

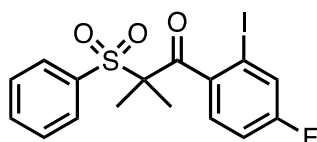

**1-(4-Fluoro-2-iodophenyl)-2-methyl-2-(phenylsulfonyl)propan-1-one (1ae)**

White solid, 65% yield, m.p. 102.9-105.8 °C. <sup>1</sup>H NMR (400 MHz, CDCl<sub>3</sub>) δ 7.87 – 7.81 (m, 2H), 7.78 – 7.69 (m, 2H), 7.64 – 7.54 (m, 3H), 6.89 (td, *J* = 8.8, 2.8 Hz, 1H), 1.69 (s, 6H). <sup>13</sup>C NMR (100 MHz, CDCl<sub>3</sub>) δ 201.4, 162.4 (d, *J* = 250 Hz), 147.1 (d, *J* = 7 Hz), 140.8 (d, *J* = 8 Hz), 134.7, 134.4, 130.9, 128.8, 118.6 (d, *J* = 22 Hz), 114.7 (d, *J* = 25 Hz), 83.5 (d, *J* = 4 Hz), 72.4, 21.6. <sup>19</sup>F NMR (376 MHz, CDCl<sub>3</sub>) δ -111.59. HRMS (ESI) calcd for C<sub>16</sub>H<sub>15</sub>FIO<sub>3</sub>S [M+H]<sup>+</sup>: 432.9765, found: 432.9766.

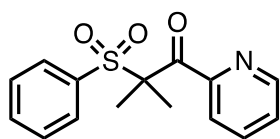

**2-Methyl-2-(phenylsulfonyl)-1-(pyridin-2-yl)propan-1-one (1af) :**

White solid, 68% yield, m.p. 81.3-83.9 °C. <sup>1</sup>H NMR (400 MHz, CDCl<sub>3</sub>) δ 8.40 (s, 1H), 7.87 (d, *J* = 8.0 Hz, 2H), 7.81 (d, *J* = 8.0 Hz, 1H), 7.73 (t, *J* = 7.6 Hz, 1H), 7.56 (t, *J* = 7.2 Hz, 1H), 7.44 (t, *J* = 7.6 Hz, 2H), 7.36 – 7.29 (m, 1H), 1.96 (s, 6H). <sup>13</sup>C NMR (100 MHz, CDCl<sub>3</sub>) δ 196.2, 153.6, 147.6, 136.7, 133.5, 130.6, 128.2, 126.5, 123.9, 74.5, 20.9. HRMS (ESI) calcd for C<sub>15</sub>H<sub>16</sub>NO<sub>3</sub>S [M+H]<sup>+</sup>: 290.0845, found: 290.0844.



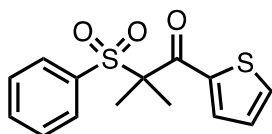

**2-Methyl-2-(phenylsulfonyl)-1-(thiophen-2-yl)propan-1-one (1ag):**

White solid, 66% yield, m.p. 67.2-70.3 °C. <sup>1</sup>H NMR (400 MHz, CDCl<sub>3</sub>) δ 8.21 (s, 1H), 7.74 – 7.58 (m, 4H), 7.47 (t, *J* = 7.6 Hz, 2H), 7.18 – 7.12 (m, 4H), 1.77 (s, 6H). <sup>13</sup>C NMR (100 MHz, CDCl<sub>3</sub>) δ 187.9, 142.4, 135.2, 135.1, 134.9, 134.1, 129.9, 128.7, 128.4, 73.5, 21.9. HRMS (ESI) calcd for C<sub>14</sub>H<sub>15</sub>O<sub>3</sub>S<sub>2</sub> [M+H]<sup>+</sup>: 295.0457, found: 295.0455.

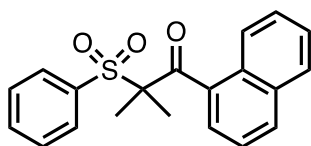

**2-Methyl-1-(naphthalen-1-yl)-2-(phenylsulfonyl)propan-1-one (1ah):**

White solid, 52% yield, m.p. 110.3-113.7 °C. <sup>1</sup>H NMR (400 MHz, CDCl<sub>3</sub>) δ 8.03 – 7.82 (m, 5H), 7.70 (t, *J* = 7.7 Hz, 1H), 7.61 – 7.43 (m, 6H), 1.68 (s, 6H). <sup>13</sup>C NMR (100 MHz, CDCl<sub>3</sub>) δ 203.5, 136.5, 135.4, 134.1, 133.5, 130.8, 130.3, 129.6, 128.6, 127.3, 126.3, 124.4, 124.4, 123.7, 73.3, 21.9. HRMS (ESI) calcd for C<sub>20</sub>H<sub>19</sub>O<sub>3</sub>S [M+H]<sup>+</sup>: 339.1049, found: 339.1048.

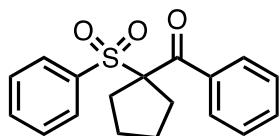

**Phenyl(1-(phenylsulfonyl)cyclopentyl)methanone (1ai):**

White solid, 47% yield, m.p. 81.6-84.7 °C. <sup>1</sup>H NMR (400 MHz, CDCl<sub>3</sub>) δ 8.11 – 8.01 (m, 2H), 7.74 – 7.66 (m, 2H), 7.66 – 7.60 (m, 1H), 7.57 – 7.52 (m, 1H), 7.52 – 7.40 (m, 4H), 2.74 – 2.64 (m, 2H), 2.52 – 2.41 (m, 2H), 1.90 – 1.81 (m, 2H), 1.59 – 1.47 (m, 2H). <sup>13</sup>C NMR (100 MHz, CDCl<sub>3</sub>) δ 197.5, 136.1, 136.0, 133.9, 132.6, 130.2, 130.0, 128.6, 128.0, 84.3, 34.4, 25.8. HRMS (ESI) calcd for C<sub>18</sub>H<sub>19</sub>O<sub>3</sub>S [M+H]<sup>+</sup>: 315.1049, found: 315.1049.

#### 4. General procedure for the asymmetric hydrogenation of $\beta$ -keto sulfones

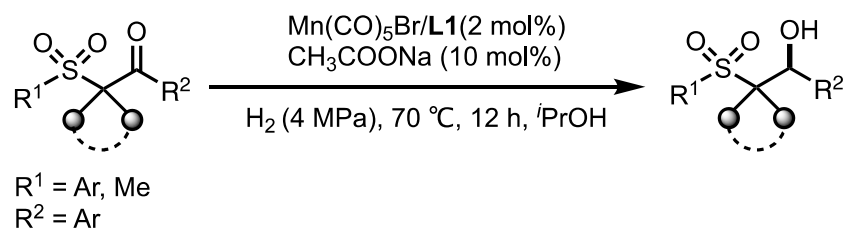

Under argon atmosphere,  $\text{Mn}(\text{CO})_5\text{Br}$  (0.02 mmol), **L1** (0.022 mmol), degassed toluene (2 mL) was added into tube and the mixture was heated to reflux for 10 h. The mixture was cooled to room temperature and concentrated to dryness, then 2 mL of degassed dried *i*PrOH was added to the crude Mn-**L1** complex. Under an argon atmosphere, a vial was charged with a solution of Mn-**L1** complex in *i*PrOH (0.4 mL, 0.004 mmol),  $\text{CH}_3\text{COONa}$  (0.02 mmol), **1** (0.2 mmol) and 1.1 mL of degassed dried *i*PrOH. The vial was placed in an alloy plate which was then placed into the autoclave. And the autoclave was purged five times with hydrogen, then pressurized to 4 MPa, stirred at 70 °C for 12 h. After slowly releasing the hydrogen pressure, the solvent was removed, and the mixture was purified by passing through a short column of silica gel to afford the corresponding alcohol.

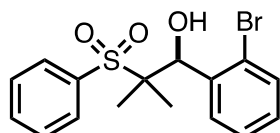

##### 1-(2-Bromophenyl)-2-methyl-2-(phenylsulfonyl)propan-1-ol (**2a**):

White solid, 96% yield, 94% *ee*, m.p. 126.9-130.0 °C;  $[\alpha]_{\text{D}}^{20} = +27.2$  ( $c = 0.5$ ,  $\text{CH}_2\text{Cl}_2$ ). The *ee* was determined by HPLC on Chiralpak OJ-H column, hexane: isopropanol = 90:10; flow rate = 1 mL/min; column temperature 25 °C; UV detection at 215 nm;  $t_{\text{R}1} = 24.58$  min (minor),  $t_{\text{R}2} = 30.75$  min (major).  $^1\text{H}$  NMR (400 MHz,  $\text{CDCl}_3$ )  $\delta$  7.99 (d,  $J = 7.6$  Hz, 2H), 7.72 (t,  $J = 7.6$  Hz, 1H), 7.67 – 7.57 (m, 3H), 7.45 (d,  $J = 8.0$  Hz, 1H), 7.34 (t,  $J = 7.6$  Hz, 1H), 7.14 (t,  $J = 7.6$  Hz, 1H), 5.70 (s, 1H), 4.19 (s, 1H), 1.53 (s, 3H), 1.05 (s, 3H).  $^{13}\text{C}$  NMR (100 MHz,  $\text{CDCl}_3$ )  $\delta$  137.4, 134.4, 134.2, 132.8, 130.6, 129.7, 129.6, 129.1, 127.5, 123.8, 71.8, 67.6, 20.3, 13.5. HRMS (ESI) calcd for  $\text{C}_{16}\text{H}_{18}\text{BrO}_3\text{S}$   $[\text{M}+\text{H}]^+$ : 369.0155, found: 369.0153.

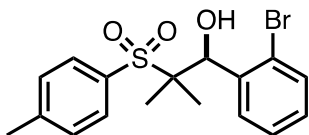

**1-(2-Bromophenyl)-2-methyl-2-tosylpropan-1-ol (2b):**

White solid, 94% yield, 94% *ee*, m.p. 123.6-125.9 °C;  $[\alpha]_D^{20} = +41.2$  ( $c = 0.5$ ,  $\text{CH}_2\text{Cl}_2$ ).

The *ee* was determined by HPLC on Chiralpak OJ-H column, hexane: isopropanol = 90:10; flow rate = 1 mL/min; column temperature 25 °C; UV detection at 215 nm;  $t_{R1} = 19.79$  min (minor),  $t_{R2} = 27.41$  min (major).  $^1\text{H NMR}$  (400 MHz,  $\text{CDCl}_3$ )  $\delta$  7.86 (d,  $J = 8.4$  Hz, 2H), 7.60 (dd,  $J = 7.6, 1.6$  Hz, 1H), 7.46 (dd,  $J = 8.0, 1.2$  Hz, 1H), 7.41 (d,  $J = 8.0$  Hz, 2H), 7.36 – 7.30 (m, 1H), 7.13 (td,  $J = 7.6, 1.6$  Hz, 1H), 5.72 (s, 1H), 4.23 (d,  $J = 1.2$  Hz, 1H), 2.48 (s, 3H), 1.51 (s, 3H), 1.04 (s, 3H).  $^{13}\text{C NMR}$  (100 MHz,  $\text{CDCl}_3$ )  $\delta$  145.3, 137.5, 132.7, 131.4, 130.5, 129.7, 129.6, 129.6, 127.4, 123.8, 71.8, 67.4, 21.7, 20.3, 13.6. HRMS (ESI) calcd for  $\text{C}_{17}\text{H}_{20}\text{BrO}_3\text{S}$   $[\text{M}+\text{H}]^+$ : 383.0311, found: 383.0312.

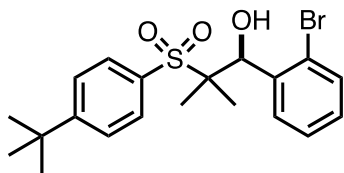

**1-(2-Bromophenyl)-2-((4-(tert-butyl)phenyl)sulfonyl)-2-methylpropan-1-ol (2c):**

White solid, 94% yield, 94% *ee*, m.p. 153.0-156.0 °C;  $[\alpha]_D^{20} = +42.4$  ( $c = 0.5$ ,  $\text{CH}_2\text{Cl}_2$ ).

The *ee* was determined by HPLC on Chiralpak OJ-H column, hexane: isopropanol = 93:7; flow rate = 1 mL/min; column temperature 25 °C; UV detection at 215 nm;  $t_{R1} = 10.77$  min (minor),  $t_{R2} = 12.32$  min (major).  $^1\text{H NMR}$  (400 MHz,  $\text{CDCl}_3$ )  $\delta$  7.93 – 7.88 (m, 2H), 7.65 – 7.58 (m, 3H), 7.44 (dd,  $J = 8.4, 1.2$  Hz, 1H), 7.36 – 7.30 (m, 1H), 7.13 (td,  $J = 8.0, 1.6$  Hz, 1H), 5.68 (s, 1H), 4.19 (s, 1H), 1.52 (s, 3H), 1.36 (s, 9H), 1.04 (s, 3H).  $^{13}\text{C NMR}$  (100 MHz,  $\text{CDCl}_3$ )  $\delta$  158.3, 137.6, 132.8, 131.1, 130.5, 129.7, 129.6, 127.5, 126.1, 123.8, 71.8, 67.4, 35.3, 31.0, 20.4, 13.5. HRMS (ESI) calcd for  $\text{C}_{20}\text{H}_{26}\text{BrO}_3\text{S}$   $[\text{M}+\text{H}]^+$ : 425.0781, found: 425.0780.

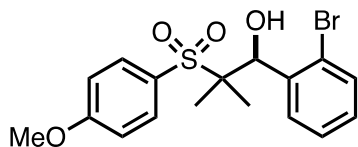

**1-(2-Bromophenyl)-2-((4-methoxyphenyl)sulfonyl)-2-methylpropan-1-ol (2d):**

White solid, 95% yield, 96% *ee*, m.p. 132.8-135.2 °C;  $[\alpha]_D^{20} = +50.0$  ( $c = 0.5$ ,  $\text{CH}_2\text{Cl}_2$ ). The *ee* was determined by HPLC on Chiralpak OD-H column, hexane: isopropanol = 90:10; flow rate = 1 mL/min; column temperature 25 °C; UV detection at 215 nm;  $t_{R1} = 40.98$  min (minor),  $t_{R2} = 53.02$  min (major).  $^1\text{H}$  NMR (400 MHz,  $\text{CDCl}_3$ )  $\delta$  7.90 (d,  $J = 9.2$  Hz, 2H), 7.64 – 7.58 (m, 1H), 7.46 (d,  $J = 8.0$  Hz, 1H), 7.34 (t,  $J = 7.6$  Hz, 1H), 7.16 – 7.11 (m, 1H), 7.11 – 7.05 (m, 2H), 5.71 (s, 1H), 4.25 (s, 1H), 3.91 (s, 3H), 1.51 (s, 3H), 1.04 (s, 3H).  $^{13}\text{C}$  NMR (100 MHz,  $\text{CDCl}_3$ )  $\delta$  164.2, 137.6, 132.8, 132.7, 129.7, 125.7, 123.9, 114.3, 71.9, 67.5, 55.7, 20.3, 13.7. HRMS (ESI) calcd for  $\text{C}_{17}\text{H}_{20}\text{BrO}_3\text{S}$   $[\text{M}+\text{H}]^+$ : 339.0260, found: 339.0262.

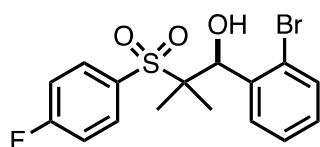

**1-(2-Bromophenyl)-2-((4-fluorophenyl)sulfonyl)-2-methylpropan-1-ol (2e):**

White solid, 96% yield, 94% *ee*, m.p. 103.6-106.7 °C;  $[\alpha]_D^{20} = +28.0$  ( $c = 0.5$ ,  $\text{CH}_2\text{Cl}_2$ ). The *ee* was determined by HPLC on Chiralpak OJ-H column, hexane: isopropanol = 90:10; flow rate = 1 mL/min; column temperature 25 °C; UV detection at 215 nm;  $t_{R1} = 16.86$  min (minor),  $t_{R2} = 20.65$  min (major).  $^1\text{H}$  NMR (400 MHz,  $\text{CDCl}_3$ )  $\delta$  8.04 – 7.97 (m, 2H), 7.59 (dd,  $J = 8.0, 2.0$  Hz, 1H), 7.47 (dd,  $J = 8.4, 1.6$  Hz, 1H), 7.36 – 7.28 (m, 3H), 7.15 (td,  $J = 7.6, 1.6$  Hz, 1H), 5.68 (s, 1H), 4.07 (d,  $J = 1.6$  Hz, 1H), 1.52 (s, 3H), 1.05 (s, 3H).  $^{13}\text{C}$  NMR (100 MHz,  $\text{CDCl}_3$ )  $\delta$  166.2 (d,  $J = 256$  Hz), 137.3, 133.4 (d,  $J = 9.6$  Hz), 132.8, 130.6 (d,  $J = 3.2$  Hz), 129.8, 129.6, 127.5, 123.8, 116.44 (d,  $J = 22.4$  Hz), 71.9, 67.8, 20.3, 13.6.  $^{19}\text{F}$  NMR (376 MHz,  $\text{CDCl}_3$ )  $\delta$  -102.41. HRMS (ESI) calcd for  $\text{C}_{16}\text{H}_{17}\text{BrFO}_3\text{S}$   $[\text{M}+\text{H}]^+$ : 387.0060, found: 387.0062.

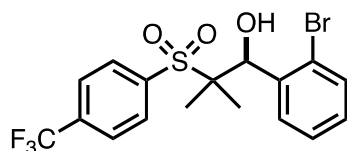

**1-(2-Bromophenyl)-2-methyl-2-((4-(trifluoromethyl)phenyl)sulfonyl)propan-1-ol (2f):**

White solid, 96% yield, 94% *ee*, m.p. 141.6-145.0 °C;  $[\alpha]_D^{20} = +23.4$  ( $c = 0.5$ ,  $\text{CH}_2\text{Cl}_2$ ). The *ee* was determined by HPLC on Chiralpak IA-H column, hexane: isopropanol = 90:10; flow rate = 1 mL/min; column temperature 25 °C; UV detection at 215 nm;  $t_{R1} = 10.28$  min (major),  $t_{R2} = 13.67$  min (minor).  $^1\text{H}$  NMR (400 MHz,  $\text{CDCl}_3$ )  $\delta$  8.13 (d,  $J$

= 8.4 Hz, 2H), 7.89 (d,  $J = 8.4$  Hz, 2H), 7.57 (dd,  $J = 8.0, 2.0$  Hz, 1H), 7.48 (dd,  $J = 8.0, 1.2$  Hz, 1H), 7.34 (td,  $J = 7.6, 1.2$  Hz, 1H), 7.16 (td,  $J = 7.6, 1.6$  Hz, 1H), 5.74 (d,  $J = 1.6$  Hz, 1H), 3.88 (d,  $J = 2.0$  Hz, 1H), 1.52 (s, 3H), 1.09 (s, 3H).  $^{13}\text{C}$  NMR (100 MHz,  $\text{CDCl}_3$ )  $\delta$  138.8, 137.3, 135.8 (q,  $J = 32.6$  Hz), 132.9, 131.3, 129.9, 129.6, 127.6, 126.1 (d,  $J = 15.2$  Hz), 123.8, 123.1 (d,  $J = 271.6$  Hz), 71.9, 68.4, 20.2, 13.9.  $^{19}\text{F}$  NMR (376 MHz,  $\text{CDCl}_3$ )  $\delta$ -63.17. HRMS (ESI) calcd for  $\text{C}_{17}\text{H}_{17}\text{BrF}_3\text{O}_3\text{S}$   $[\text{M}+\text{H}]^+$ : 437.0028, found: 437.0029.

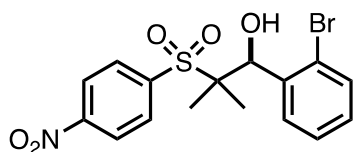

**1-(2-Bromophenyl)-2-methyl-2-((4-nitrophenyl)sulfonyl)propan-1-ol (2g):**

White solid, 96% yield, 94% *ee*, m.p.172.5-175.3 °C;  $[\alpha]_{\text{D}}^{20} = +31.2$  ( $c = 0.5$ ,  $\text{CH}_2\text{Cl}_2$ ). The *ee* was determined by HPLC on Chiralpak OJ-H column, hexane: isopropanol = 90:10; flow rate = 1 mL/min; column temperature 25 °C; UV detection at 215 nm;  $t_{\text{R}1} = 48.31$  min (minor),  $t_{\text{R}2} = 66.78$  min (major).  $^1\text{H}$  NMR (400 MHz,  $\text{CDCl}_3$ )  $\delta$  8.47 – 8.40 (m, 2H), 8.23 – 8.18 (m, 2H), 7.55 (dd,  $J = 8.0, 1.6$  Hz, 1H), 7.49 (dd,  $J = 8.0, 1.2$  Hz, 1H), 7.35 (td,  $J = 7.2, 1.2$  Hz, 1H), 7.17 (td,  $J = 7.2, 1.6$  Hz, 1H), 5.74 (d,  $J = 1.6$  Hz, 1H), 3.68 (d,  $J = 2.0$  Hz, 1H), 1.52 (s, 3H), 1.12 (s, 3H).  $^{13}\text{C}$  NMR (100 MHz,  $\text{CDCl}_3$ )  $\delta$  151., 141.5, 137.2, 133.0, 132.1, 130.0, 129.5, 127.7, 123.9, 123.8, 71.9, 68.9, 20.1, 14.1. HRMS (ESI) calcd for  $\text{C}_{16}\text{H}_{17}\text{BrNO}_5\text{S}$   $[\text{M}+\text{H}]^+$ : 414.0005, found: 414.0003.

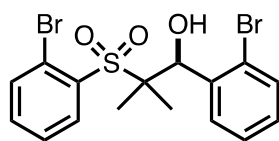

**1-(2-Bromophenyl)-2-((2-bromophenyl)sulfonyl)-2-methylpropan-1-ol (2h):**

White solid, 94% yield, 95% *ee*, m.p.157.5-160.0 °C;  $[\alpha]_{\text{D}}^{20} = +44.0$  ( $c = 0.5$ ,  $\text{CH}_2\text{Cl}_2$ ). The *ee* was determined by HPLC on Chiralpak OJ-H column, hexane: isopropanol = 90:10; flow rate = 0.8 mL/min; column temperature 25 °C; UV detection at 215 nm;  $t_{\text{R}1} = 30.83$  min (minor),  $t_{\text{R}2} = 49.97$  min (major).  $^1\text{H}$  NMR (400 MHz,  $\text{CDCl}_3$ )  $\delta$  8.15 (dd,  $J = 7.6, 1.6$  Hz, 1H), 7.86 (dd,  $J = 7.6, 0.8$  Hz, 1H), 7.62 – 7.44 (m, 4H), 7.34 (t,  $J = 7.6$  Hz, 1H), 7.15 (td,  $J = 7.6, 1.6$  Hz, 1H), 5.85 (d,  $J = 1.6$  Hz, 1H), 4.09 (d,  $J = 1.6$  Hz, 1H), 1.59 (s, 3H), 1.12 (s, 3H).  $^{13}\text{C}$  NMR (100 MHz,  $\text{CDCl}_3$ )  $\delta$  137.5, 136.6, 135.3,

134.9, 134.5, 132.8, 129.8, 129.5, 127.9, 127.6, 123.9, 123.3, 71.6, 70.7, 20.6, 13.9. HRMS (ESI) calcd for C<sub>16</sub>H<sub>17</sub>BrO<sub>3</sub>S [M+H]<sup>+</sup>: 448.9260, found: 448.9261.

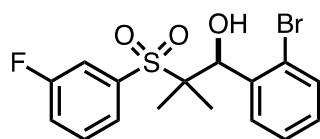

**1-(2-Bromophenyl)-2-((3-fluorophenyl)sulfonyl)-2-methylpropan-1-ol (2i):**

White solid, 95% yield, 96% *ee*, m.p.137.7-141.6 °C; [ $\alpha$ ]<sup>20</sup><sub>D</sub> = +23.6 (c = 0.5, CH<sub>2</sub>Cl<sub>2</sub>). The *ee* was determined by HPLC on Chiralpak OJ-H column, hexane: isopropanol = 90:10; flow rate = 1 mL/min; column temperature 25 °C; UV detection at 215 nm; t<sub>R1</sub> = 21.06 min (minor), t<sub>R2</sub> = 22.68 min (major). <sup>1</sup>H NMR (400 MHz, CDCl<sub>3</sub>)  $\delta$  7.79 (d, *J* = 8.0 Hz, 1H), 7.70 (dt, *J* = 8.0, 2.0 Hz, 1H), 7.65 – 7.55 (m, 2H), 7.49 – 7.39 (m, 2H), 7.34 (t, *J* = 7.5 Hz, 1H), 7.14 (td, *J* = 8.0, 1.6 Hz, 1H), 5.72 (s, 1H), 3.98 (d, *J* = 1.6 Hz, 1H), 1.52 (s, 3H), 1.07 (s, 3H). <sup>13</sup>C NMR (100 MHz, CDCl<sub>3</sub>)  $\delta$  162.3 (d, *J* = 250.9 Hz), 137.4, 137.0 (d, *J* = 6.4 Hz), 132.8, 130.8 (d, *J* = 7.6 Hz), 129.8, 129.6, 127.5, 126.5 (d, *J* = 3.4 Hz), 123.8, 121.41 (d, *J* = 21.2 Hz), 117.9 (d, *J* = 24.1 Hz), 71.8, 68.2, 20.3, 13.8. <sup>19</sup>F NMR (376 MHz, CDCl<sub>3</sub>)  $\delta$ -109.23. HRMS (ESI) calcd for C<sub>16</sub>H<sub>17</sub>BrFO<sub>3</sub>S [M+H]<sup>+</sup>: 387.0060, found: 387.0060.

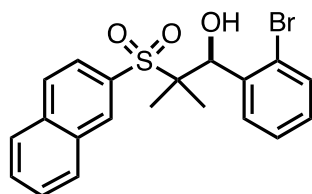

**1-(2-Bromophenyl)-2-methyl-2-(naphthalen-2-ylsulfonyl)propan-1-ol (2j):**

White solid, 77% yield, 95% *ee*, m.p.172.4-175.9 °C; [ $\alpha$ ]<sup>20</sup><sub>D</sub> = +42.4 (c = 0.5, CH<sub>2</sub>Cl<sub>2</sub>). The *ee* was determined by HPLC on Chiralpak OJ-H column, hexane: isopropanol = 97:3; flow rate = 0.8 mL/min; column temperature 25 °C; UV detection at 215 nm; t<sub>R1</sub> = 74.71 min (minor), t<sub>R2</sub> = 81.75 min (major). <sup>1</sup>H NMR (400 MHz, CDCl<sub>3</sub>)  $\delta$  8.57 (d, *J* = 1.2 Hz, 1H), 8.08 – 8.02 (m, 2H), 7.99 – 7.94 (m, 2H), 7.74 – 7.60 (m, 3H), 7.43 (dd, *J* = 8.0, 1.6 Hz, 1H), 7.34 (td, *J* = 7.6, 1.2 Hz, 1H), 7.16 – 7.09 (m, 2H), 5.84 (s, 1H), 4.26 (d, *J* = 1.2 Hz, 1H), 1.57 (s, 3H), 1.10 (s, 3H). <sup>13</sup>C NMR (100 MHz, CDCl<sub>3</sub>)  $\delta$  137.5, 135.4, 132.8, 132.7, 129.7, 129.6, 129.6, 129.5, 129.1, 128.0, 127.8, 127.5, 124.9, 123.9, 72.0, 68.0, 20.5, 13.9. HRMS (ESI) calcd for C<sub>20</sub>H<sub>20</sub>BrO<sub>3</sub>S [M+H]<sup>+</sup>: 419.0311, found: 419.0309.

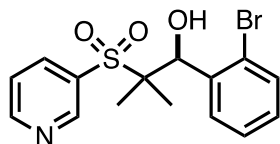

**1-(2-Bromophenyl)-2-methyl-2-(pyridin-3-ylsulfonyl)propan-1-ol (2k):**

White solid, 92% yield, 95% *ee*, m.p.143.7-146.4 °C;  $[\alpha]_D^{20} = +22.0$  (*c* = 0.5, CH<sub>2</sub>Cl<sub>2</sub>).

The *ee* was determined by HPLC on Chiralpak OD-H column, hexane: isopropanol = 90:10; flow rate = 1 mL/min; column temperature 25 °C; UV detection at 215 nm;  $t_{R1} = 24.86$  min (minor),  $t_{R2} = 32.19$  min (major). <sup>1</sup>H NMR (400 MHz, CDCl<sub>3</sub>) δ 9.09 (d, *J* = 1.6 Hz, 1H), 8.78 (dd, *J* = 5.2, 1.6 Hz, 1H), 8.25 (dt, *J* = 8.0, 2 Hz, 1H), 7.56 – 7.45 (m, 2H), 7.50 – 7.45 (m, 1H), 7.32 (t, *J* = 7.2 Hz, 1H), 7.14 (td, *J* = 8.0, 1.6 Hz, 1H), 5.78 (s, 1H), 4.44 (s, 1H), 1.47 (s, 3H), 1.14 (s, 3H). <sup>13</sup>C NMR (100 MHz, CDCl<sub>3</sub>) δ 153.8, 150.9, 138.2, 138.0, 133.0, 132.8, 129.8, 129.6, 127.6, 123.7, 123.5, 71.8, 68.9, 19.5, 14.3. HRMS (ESI) calcd for C<sub>15</sub>H<sub>17</sub>BrNO<sub>3</sub>S [M+H]<sup>+</sup>: 370.0107, found: 370.0106.

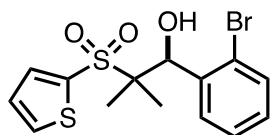

**1-(2-Bromophenyl)-2-methyl-2-(thiophen-2-ylsulfonyl)propan-1-ol (2l):**

White solid, 93% yield, 97% *ee*, m.p.129.6-133.1 °C;  $[\alpha]_D^{20} = +36.6$  (*c* = 0.5, CH<sub>2</sub>Cl<sub>2</sub>).

The *ee* was determined by HPLC on Chiralpak OJ-H column, hexane: isopropanol = 97:3; flow rate = 1 mL/min; column temperature 25 °C; UV detection at 215 nm;  $t_{R1} = 20.21$  min (major),  $t_{R2} = 30.27$  min (minor). <sup>1</sup>H NMR (400 MHz, CDCl<sub>3</sub>) δ 7.85 (dd, *J* = 5.2, 1.6 Hz, 1H), 7.80 (dd, *J* = 3.6, 1.2 Hz, 1H), 7.60 (dd, *J* = 8.0, 1.6 Hz, 1H), 7.48 (dd, *J* = 8.0, 1.2 Hz, 1H), 7.34 (td, *J* = 7.6, 1.2 Hz, 1H), 7.25 (dd, *J* = 4.8, 3.6 Hz, 1H), 7.15 (td, *J* = 7.6, 1.6 Hz, 1H), 5.80 (s, 1H), 4.01 (s, 1H), 1.56 (s, 3H), 1.16 (s, 3H). <sup>13</sup>C NMR (100 MHz, CDCl<sub>3</sub>) δ 137.5, 136.8, 135.5, 135.1, 132.8, 129.8, 129.5, 128.1, 127.5, 123.8, 71.9, 68.4, 20.5, 13.7. HRMS (ESI) calcd for C<sub>14</sub>H<sub>16</sub>BrO<sub>3</sub>S<sub>2</sub> [M+H]<sup>+</sup>: 374.7919, found: 374.7916.

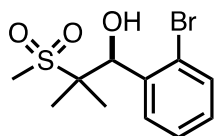

**1-(2-Bromophenyl)-2-methyl-2-(methylsulfonyl)propan-1-ol (2m):**

White solid, 97% yield, 94% *ee*, m.p.154.0-156.7 °C;  $[\alpha]_D^{20} = +27.6$  ( $c = 0.5$ , CH<sub>2</sub>Cl<sub>2</sub>). The *ee* was determined by HPLC on Chiralpak OJ-H column, hexane: isopropanol = 90:10; flow rate = 1 mL/min; column temperature 25 °C; UV detection at 215 nm;  $t_{R1} = 12.64$  min (major),  $t_{R2} = 14.67$  min (minor). <sup>1</sup>H NMR (400 MHz, CDCl<sub>3</sub>)  $\delta$  7.61 – 7.53 (m, 2H), 7.39 – 7.34 (m, 1H), 7.19 (td,  $J = 7.6, 1.6$  Hz, 1H), 5.80 (d,  $J = 2.4$  Hz, 1H), 3.48 (d,  $J = 2.4$  Hz, 1H), 3.08 (s, 3H), 1.46 (s, 3H), 1.20 (s, 3H). <sup>13</sup>C NMR (100 MHz, CDCl<sub>3</sub>)  $\delta$  138.2, 132.9, 129.9, 129.6, 127.6, 123.9, 72.4, 67.2, 37.9, 18.6, 14.3. HRMS (ESI) calcd for C<sub>11</sub>H<sub>16</sub>BrO<sub>3</sub>S [M+H]<sup>+</sup>: 306.9998, found: 307.0001.

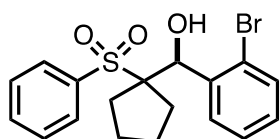

**(2-Bromophenyl)(1-(phenylsulfonyl)cyclopentyl)methanol (2n):**

White solid, 91% yield, 94% *ee*, m.p.121.6-125.8 °C;  $[\alpha]_D^{20} = +33.8$  ( $c = 0.5$ , CH<sub>2</sub>Cl<sub>2</sub>). The *ee* was determined by HPLC on Chiralpak OJ-H column, hexane: isopropanol = 90:10; flow rate = 1 mL/min; column temperature 25 °C; UV detection at 215 nm;  $t_{R1} = 29.69$  min (minor),  $t_{R2} = 42.25$  min (major). <sup>1</sup>H NMR (400 MHz, CDCl<sub>3</sub>)  $\delta$  8.08 – 7.02 (m, 3H), 7.75 – 7.69 (m, 1H), 7.68 – 7.60 (m, 3H), 7.41 (dd,  $J = 8.0, 1.6$  Hz, 1H), 7.32 (td,  $J = 7.6, 1.6$  Hz, 1H), 7.13 (td,  $J = 8.0, 1.6$  Hz, 1H), 5.60 (s, 1H), 4.34 (d,  $J = 1.2$  Hz, 1H), 2.62 – 2.54 (m, 2H), 2.12 – 2.01 (m, 1H), 1.62 – 1.42 (m, 4H), 0.62 – 0.51 (m, 1H). <sup>13</sup>C NMR (100 MHz, CDCl<sub>3</sub>)  $\delta$  137.6, 135.2, 134.1, 132.7, 130.6, 129.8, 129.6, 129.2, 127.6, 124.0, 77.7, 71.7, 32.4, 263, 25.9, 25.8. HRMS (ESI) calcd for C<sub>18</sub>H<sub>20</sub>BrO<sub>3</sub>S [M+H]<sup>+</sup>: 395.0311, found: 395.0312.

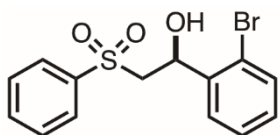

**1-(2-Bromophenyl)-2-(phenylsulfonyl)ethan-1-ol (2o):**

White solid, 94% yield, 60% *ee*, m.p.119.4-122.0 °C;  $[\alpha]_D^{20} = +33.8$  ( $c = 0.5$ , CH<sub>2</sub>Cl<sub>2</sub>). The *ee* was determined by HPLC on Chiralpak OJ-H column, hexane: isopropanol = 90:10; flow rate = 1 mL/min; column temperature 25 °C; UV detection at 215 nm;  $t_{R1} = 40.14$  min (minor),  $t_{R2} = 51.64$  min (major). <sup>1</sup>H NMR (400 MHz, CDCl<sub>3</sub>)  $\delta$  8.06 – 7.97 (m, 2H), 7.73 – 7.58 (m, 4H), 7.42 (dd,  $J = 8.4, 1.2$  Hz, 1H), 7.37 – 7.30 (m, 1H), 7.13 (td,  $J = 8.0, 1.6$  Hz, 1H), 5.36 (d,  $J = 10.4$  Hz, 1H), 4.04 (d,  $J = 2$  Hz, 1H), 3.52



(dd,  $J = 14.8, 1.2$  Hz, 1H), 3.26 (dd,  $J = 14.4, 10.0$  Hz, 1H).  $^{13}\text{C}$  NMR (100 MHz,  $\text{CDCl}_3$ )  $\delta$  139.2, 138.3, 124.2, 132.6, 129.6, 129.4, 128.3, 128.0, 127.5, 120.7, 67.6, 61.75. HRMS (ESI) calcd for  $\text{C}_{14}\text{H}_{14}\text{BrO}_3\text{S}$   $[\text{M}+\text{H}]^+$ : 340.9842, found: 340.9841.

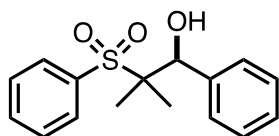

**2-Methyl-1-phenyl-2-(phenylsulfonyl)propan-1-ol (2p):**

White solid, 95% yield, 86% *ee*, m.p. 174.5-176.7 °C;  $[\alpha]_{\text{D}}^{20} = +26.7$  ( $c = 0.5$ ,  $\text{CH}_2\text{Cl}_2$ ). The *ee* was determined by HPLC on Chiralpak OJ-H column, hexane: isopropanol = 90:10; flow rate = 1 mL/min; column temperature 25 °C; UV detection at 215 nm;  $t_{\text{R}1} = 16.48$  min (minor),  $t_{\text{R}2} = 24.67$  min (major).  $^1\text{H}$  NMR (400 MHz,  $\text{CDCl}_3$ )  $\delta$  7.99 – 7.91 (m, 2H), 7.72 (t,  $J = 7.2$  Hz, 1H), 7.61 (t,  $J = 7.6$  Hz, 2H), 7.34 – 7.25 (m, 5H), 5.19 (s, 1H), 4.24 (d,  $J = 0.8$  Hz, 1H), 1.40 (s, 3H), 0.94 (s, 3H).  $^{13}\text{C}$  NMR (100 MHz,  $\text{CDCl}_3$ )  $\delta$  137.8, 134.9, 134.2, 130.4, 129.0, 128.2, 127.9, 127.9, 74.6, 66.6, 21.5, 13.9. HRMS (ESI) calcd for  $\text{C}_{16}\text{H}_{19}\text{O}_3\text{S}$   $[\text{M}+\text{H}]^+$ : 291.1049, found: 291.1048.

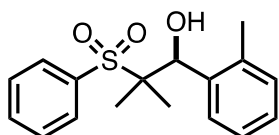

**2-Methyl-2-(phenylsulfonyl)-1-(o-tolyl)propan-1-ol (2q):**

White solid, 94% yield, 90% *ee*, m.p. 135.6-138.7 °C;  $[\alpha]_{\text{D}}^{20} = +31.8$  ( $c = 0.5$ ,  $\text{CH}_2\text{Cl}_2$ ). The *ee* was determined by HPLC on Chiralpak OJ-H column, hexane: isopropanol = 90:10; flow rate = 1 mL/min; column temperature 25 °C; UV detection at 215 nm;  $t_{\text{R}1} = 19.30$  min (minor),  $t_{\text{R}2} = 25.58$  min (major).  $^1\text{H}$  NMR (400 MHz,  $\text{CDCl}_3$ ) 8.01 – 7.95 (m, 2H), 7.75 – 7.69 (m, 1H), 7.66 – 7.59 (m, 2H), 7.53 (dd,  $J = 7.6, 1.6$  Hz, 1H), 7.24 – 7.15 (m, 2H), 7.09 (dd,  $J = 7.6, 2.0$  Hz, 1H), 5.65 (d,  $J = 1.6$  Hz, 1H), 3.96 (d,  $J = 1.6$  Hz, 1H), 2.12 (s, 3H), 1.50 (s, 3H), 0.92 (s, 3H).  $^{13}\text{C}$  NMR (100 MHz,  $\text{CDCl}_3$ )  $\delta$  136.5, 135.5, 134.8, 134.1, 130.5, 130.4, 129.0, 127.2, 127.5, 126.0, 68.8, 67.9, 20.2, 19.9, 14.4. HRMS (ESI) calcd for  $\text{C}_{17}\text{H}_{21}\text{O}_3\text{S}$   $[\text{M}+\text{H}]^+$ : 305.1206, found: 305.1204.

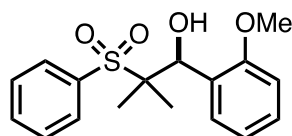

**1-(2-Methoxyphenyl)-2-methyl-2-(phenylsulfonyl)propan-1-ol (2r):**

White solid, 94% yield, 88% *ee*, m.p. 145.5-148.0 °C;  $[\alpha]_D^{20} = +17.2$  ( $c = 0.5$ , CH<sub>2</sub>Cl<sub>2</sub>). The *ee* was determined by HPLC on Chiralpak OJ-H column, hexane: isopropanol = 90:10; flow rate = 1 mL/min; column temperature 25 °C; UV detection at 215 nm;  $t_{R1} = 48.78$  min (minor),  $t_{R2} = 53.29$  min (major). <sup>1</sup>H NMR (400 MHz, CDCl<sub>3</sub>)  $\delta$  7.98 (d,  $J = 7.6$  Hz, 2H), 7.71 (t,  $J = 7.2$  Hz, 1H), 7.61 (t,  $J = 7.6$  Hz, 2H), 7.52 – 7.47 (m, 1H), 7.27 – 7.21 (m, 1H), 6.97 (t,  $J = 7.2$  Hz, 1H), 6.78 (d,  $J = 8.4$  Hz, 1H), 5.76 (d,  $J = 1.2$  Hz, 1H), 4.00 (d,  $J = 2.0$  Hz, 1H), 3.59 (s, 3H), 1.45 (s, 3H), 0.95 (s, 3H). <sup>13</sup>C NMR (100 MHz, CDCl<sub>3</sub>)  $\delta$  156.3, 135.3, 133.8, 130.5, 129.0, 128.7, 128.4, 126.6, 120.6, 110.2, 67.5, 66.8, 55.0, 20.0, 13.9. HRMS (ESI) calcd for C<sub>17</sub>H<sub>21</sub>O<sub>4</sub>S [M+H]<sup>+</sup>: 321.1155, found: 321.1155.

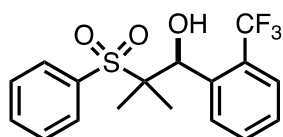

**2-Methyl-2-(phenylsulfonyl)-1-(2-(trifluoromethyl)phenyl)propan-1-ol (2s):**

White solid, 93% yield, 89% *ee*, m.p. 153.9-156.4 °C;  $[\alpha]_D^{20} = +98.8$  ( $c = 0.5$ , CH<sub>2</sub>Cl<sub>2</sub>). The *ee* was determined by HPLC on Chiralpak OJ-H column, hexane: isopropanol = 90:10; flow rate = 1 mL/min; column temperature 25 °C; UV detection at 210 nm;  $t_{R1} = 16.61$  min (minor),  $t_{R2} = 18.36$  min (major). <sup>1</sup>H NMR (400 MHz, CDCl<sub>3</sub>)  $\delta$  7.99 – 7.93 (m, 2H), 7.81 (d,  $J = 8.0$  Hz, 1H), 7.77 – 7.72 (m, 2H), 7.66 – 7.56 (m, 4H), 7.40 (t,  $J = 8.0$  Hz, 1H), 5.59 (s, 1H), 4.22 (d,  $J = 1.2$  Hz, 1H), 1.67 (s, 3H), 0.85 (s, 3H). <sup>13</sup>C NMR (100 MHz, CDCl<sub>3</sub>)  $\delta$  134.3, 134.1, 131.9, 130.5, 129.4, 129.0, 128.5, 128.2 (q,  $J = 29.5$  Hz), 126.6 (q,  $J = 4.7$  Hz), 125.97 (q,  $J = 5.9$  Hz), 123.7 (q,  $J = 272.6$  Hz), 68.34 (q,  $J = 2.5$  Hz), 67.3, 20.6 (q,  $J = 2.5$  Hz), 13.8. <sup>19</sup>F NMR (376 MHz, CDCl<sub>3</sub>)  $\delta$  -56.62. HRMS (ESI) calcd for C<sub>17</sub>H<sub>18</sub>F<sub>3</sub>O<sub>3</sub>S [M+H]<sup>+</sup>: 359.0923, found: 359.0921.

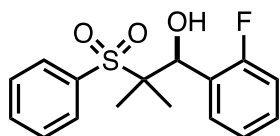

**1-(2-Fluorophenyl)-2-methyl-2-(phenylsulfonyl)propan-1-ol (2t):**

White solid, 94% yield, 87% *ee*, m.p. 142.0-144.6 °C;  $[\alpha]_D^{20} = +58.8$  ( $c = 0.5$ , CH<sub>2</sub>Cl<sub>2</sub>). The *ee* was determined by HPLC on Chiralpak IA-H column, hexane: isopropanol = 90:10; flow rate = 1 mL/min; column temperature 25 °C; UV detection at 210 nm;  $t_{R1} = 14.39$  min (minor),  $t_{R2} = 18.10$  min (major). <sup>1</sup>H NMR (400 MHz, CDCl<sub>3</sub>)  $\delta$  8.02 –

7.94 (m, 2H), 7.77 – 7.70 (m, 1H), 7.67 – 7.56 (m, 3H), 7.31 – 7.23 (m, 1H), 7.17 (td,  $J = 7.8, 1.2$  Hz, 1H), 7.00 – 6.92 (m, 1H), 5.60 (s, 1H), 4.26 (d,  $J = 1.6$  Hz, 1H), 1.44 (s, 3H), 1.00 (d,  $J = 2.0$  Hz, 3H).  $^{13}\text{C}$  NMR (100 MHz,  $\text{CDCl}_3$ )  $\delta$  159.6 (d,  $J = 245$  Hz), 134.7, 134.2, 130.4, 129.7 (d,  $J = 8.4$  Hz), 129.2 (d,  $J = 3.5$  Hz), 129.0, 125.4 (d,  $J = 12.3$  Hz), 124.2 (d,  $J = 3.4$  Hz), 115.0 (d,  $J = 22.3$  Hz), 67.1 (d,  $J = 2.5$  Hz), 66.8 (d,  $J = 1.1$  Hz), 20.1 (d,  $J = 3.5$  Hz), 13.7.  $^{19}\text{F}$  NMR (376 MHz,  $\text{CDCl}_3$ )  $\delta$ -114.61. HRMS (ESI) calcd for  $\text{C}_{16}\text{H}_{18}\text{FO}_3\text{S}$   $[\text{M}+\text{H}]^+$ : 309.0955, found: 309.0954.

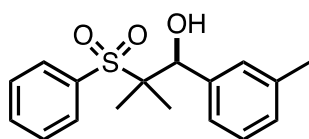

**2-Methyl-2-(phenylsulfonyl)-1-(*m*-tolyl)propan-1-ol (2u):**

White solid, 95% yield, 81% *ee*, m.p. 140.5-143.1 °C;  $[\alpha]_{\text{D}}^{20} = +33.8$  ( $c = 0.5$ ,  $\text{CH}_2\text{Cl}_2$ ). The *ee* was determined by HPLC on Chiralpak IA-H column, hexane: isopropanol = 90:10; flow rate = A mL/min; column temperature 25 °C; UV detection at 215 nm;  $t_{\text{R}1} = 12.24$  min (minor),  $t_{\text{R}2} = 14.87$  min (major).  $^1\text{H}$  NMR (400 MHz,  $\text{CDCl}_3$ )  $\delta$  7.99 – 7.93 (m, 2H), 7.72 (t,  $J = 7.2$  Hz, 1H), 7.61 (t,  $J = 8.0$  Hz, 2H), 7.18 (t,  $J = 7.6$  Hz, 1H), 7.13 – 7.03 (m, 3H), 5.15 (s, 1H), 4.19 (s, 1H), 2.32 (s, 3H), 1.41 (s, 3H), 0.94 (s, 3H).  $^{13}\text{C}$  NMR (100 MHz,  $\text{CDCl}_3$ )  $\delta$  137.8, 137.6, 135.1, 134.1, 130.4, 129.0, 128.9, 128.5, 127.7, 125.2, 74.7, 66.7, 21.6, 21.4, 13.0. HRMS (ESI) calcd for  $\text{C}_{17}\text{H}_{21}\text{O}_3\text{S}$   $[\text{M}+\text{H}]^+$ : 305.1206, found: 305.1208.

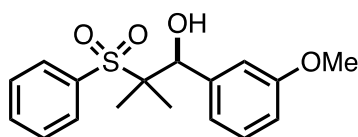

**1-(3-Methoxyphenyl)-2-methyl-2-(phenylsulfonyl)propan-1-ol (2v):**

White solid, 93% yield, 81% *ee*, m.p. 90.2-92.9 °C;  $[\alpha]_{\text{D}}^{20} = +29.8$  ( $c = 0.5$ ,  $\text{CH}_2\text{Cl}_2$ ). The *ee* was determined by HPLC on Chiralpak IA-H column, hexane: isopropanol = 90:10; flow rate = 1 mL/min; column temperature 25 °C; UV detection at 215 nm;  $t_{\text{R}1} = 16.61$  min (minor),  $t_{\text{R}2} = 25.47$  min (major).  $^1\text{H}$  NMR (400 MHz,  $\text{CDCl}_3$ )  $\delta$  7.95 (dd,  $J = 8.4, 1.2$  Hz, 2H), 7.72 (t,  $J = 7.6$  Hz, 1H), 7.61 (t,  $J = 8.0$  Hz, 2H), 7.21 (t,  $J = 7.8$  Hz, 1H), 6.88 – 6.80 (m, 3H), 5.16 (s, 1H), 4.20 (s, 1H), 3.78 (s, 3H), 1.41 (s, 3H), 0.95 (s, 3H).  $^{13}\text{C}$  NMR (100 MHz,  $\text{CDCl}_3$ )  $\delta$  159.2, 139.4, 134.9, 134.1, 130.4, 120.0, 128.8,

120.5, 113.8, 113.5, 74.5, 66.7, 55.2, 21.6, 14.0. HRMS (ESI) calcd for C<sub>17</sub>H<sub>21</sub>O<sub>4</sub>S [M+H]<sup>+</sup>: 321.1155, found: 321.1155.

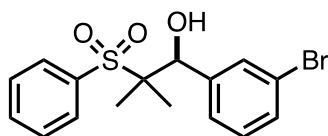

**1-(3-Bromophenyl)-2-methyl-2-(phenylsulfonyl)propan-1-ol (2w):**

White solid, 94% yield, 91% *ee*, m.p. 166.6-169.4 °C; [ $\alpha$ ]<sub>D</sub><sup>20</sup> = +29.4 (c = 0.5, CH<sub>2</sub>Cl<sub>2</sub>). The *ee* was determined by HPLC on Chiralpak IA-H column, hexane: isopropanol = 90:10; flow rate = 1 mL/min; column temperature 25 °C; UV detection at 215 nm; t<sub>R1</sub> = 14.24 min (minor), t<sub>R2</sub> = 16.68 min (major). <sup>1</sup>H NMR (400 MHz, CDCl<sub>3</sub>)  $\delta$  7.97 – 7.92 (m, 2H), 7.76 – 7.70 (m, 1H), 7.66 – 7.59 (m, 2H), 7.46 (t, *J* = 2.0 Hz, 1H), 7.23 – 7.14 (m, 2H), 5.14 (s, 1H), 4.31 (s, 1H), 1.38 (s, 3H), 0.95 (s, 3H). <sup>13</sup>C NMR (100 MHz, CDCl<sub>3</sub>)  $\delta$  140.2, 134.7, 134.3, 131.4, 130.9, 130.4, 129.4, 129.1, 126.7, 122.2, 74.1, 66.4, 21.5, 13.9. HRMS (ESI) calcd for C<sub>16</sub>H<sub>18</sub>BrO<sub>3</sub>S [M+H]<sup>+</sup>: 369.0155, found: 369.0153.

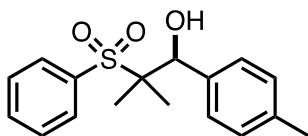

**2-Methyl-2-(phenylsulfonyl)-1-(p-tolyl)propan-1-ol (2x):**

White solid, 94% yield, 88% *ee*, m.p. 105.4-107.9 °C; [ $\alpha$ ]<sub>D</sub><sup>20</sup> = +32.8 (c = 0.5, CH<sub>2</sub>Cl<sub>2</sub>). The *ee* was determined by HPLC on Chiralpak OJ-H column, hexane: isopropanol = 90:10; flow rate = 1 mL/min; column temperature 25 °C; UV detection at 215 nm; t<sub>R1</sub> = 22.85 min (major), t<sub>R2</sub> = 26.42 min (minor). <sup>1</sup>H NMR (400 MHz, CDCl<sub>3</sub>)  $\delta$  7.98 – 7.92 (m, 2H), 7.74 – 7.68 (m, 1H), 7.64 – 7.57 (m, 2H), 7.17 (d, *J* = 8.0 Hz, 2H), 7.11 (d, *J* = 8.0 Hz, 2H), 5.15 (s, 1H), 4.18 (s, 1H), 2.32 (s, 3H), 1.40 (s, 3H), 0.94 (s, 3H). <sup>13</sup>C NMR (100 MHz, CDCl<sub>3</sub>)  $\delta$  138.0, 135.1, 134.9, 134.0, 130.42, 128.9, 128.6, 127.8, 74.53, 66.8, 21.5, 21.0, 13.9. HRMS (ESI) calcd for C<sub>17</sub>H<sub>21</sub>O<sub>3</sub>S [M+H]<sup>+</sup>: 305.1206, found: 305.1205.

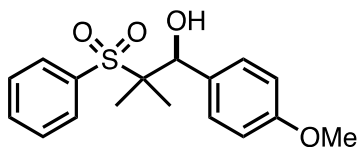

**1-(4-Methoxyphenyl)-2-methyl-2-(phenylsulfonyl)propan-1-ol (2y):**

White solid, 92% yield, 86% *ee*, m.p. 115.6-118.2 °C;  $[\alpha]_{\text{D}}^{20} = +31.8$  ( $c = 0.5$ ,  $\text{CH}_2\text{Cl}_2$ ). The *ee* was determined by HPLC on Chiralpak IA-H column, hexane: isopropanol = 93:7; flow rate = 1 mL/min; column temperature 25 °C; UV detection at 215 nm;  $t_{\text{R}1} = 35.01$  min (minor),  $t_{\text{R}2} = 59.67$  min (major).  $^1\text{H}$  NMR (400 MHz,  $\text{CDCl}_3$ )  $\delta$  7.98 – 7.92 (m, 2H), 7.73 – 7.68 (m, 1H), 7.63 – 7.57 (m, 2H), 7.23 – 7.17 (m, 2H), 6.86 – 6.79 (m, 2H), 5.14 (s, 1H), 4.18 (s, 1H), 3.77 (s, 3H), 1.38 (s, 3H), 0.92 (s, 3H).  $^{13}\text{C}$  NMR (100 MHz,  $\text{CDCl}_3$ )  $\delta$  159.5, 135.1, 134.0, 130.4, 130.0, 129.0, 128.9, 113.3, 74.3, 66.9, 55.2, 21.5, 13.9. HRMS (ESI) calcd for  $\text{C}_{17}\text{H}_{21}\text{O}_4\text{S}$   $[\text{M}+\text{H}]^+$ : 321.1155, found: 321.1154.

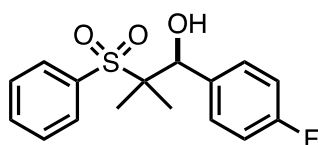**1-(4-Fluorophenyl)-2-methyl-2-(phenylsulfonyl)propan-1-ol (2z):**

White solid, 94% yield, 76% *ee*, m.p. 113.7-117.0 °C;  $[\alpha]_{\text{D}}^{20} = +16.8$  ( $c = 0.5$ ,  $\text{CH}_2\text{Cl}_2$ ). The *ee* was determined by HPLC on Chiralpak OJ-H column, hexane: isopropanol = 90:10; flow rate = 1 mL/min; column temperature 25 °C; UV detection at 215 nm;  $t_{\text{R}1} = 25.10$  min (minor),  $t_{\text{R}2} = 34.96$  min (major).  $^1\text{H}$  NMR (400 MHz,  $\text{CDCl}_3$ )  $\delta$  7.95 (d,  $J = 7.6$  Hz, 2H), 7.72 (t,  $J = 7.2$  Hz, 1H), 7.61 (t,  $J = 7.6$  Hz, 2H), 7.30 – 7.24 (m, 2H), 7.00 (t,  $J = 8.4$  Hz, 2H), 5.18 (s, 1H), 4.30 (d,  $J = 1.2$  Hz, 1H), 1.37 (s, 3H), 0.92 (s, 3H).  $^{13}\text{C}$  NMR (100 MHz,  $\text{CDCl}_3$ )  $\delta$  162.6 (d,  $J = 245.4$  Hz), 134.9, 134.2, 133.7 (d,  $J = 3.2$  Hz), 130.4, 129.6 (d,  $J = 8.0$  Hz), 129.0, 114.9 (d,  $J = 21.3$  Hz), 74.1, 66.6, 21.5, 13.9.  $^{19}\text{F}$  NMR (376 MHz,  $\text{CDCl}_3$ )  $\delta$  -113.65. HRMS (ESI) calcd for  $\text{C}_{16}\text{H}_{18}\text{FO}_3\text{S}$   $[\text{M}+\text{H}]^+$ : 309.0955, found: 309.0954.

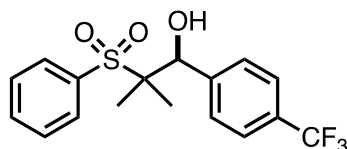**2-Methyl-2-(phenylsulfonyl)-1-(4-(trifluoromethyl)phenyl)propan-1-ol (2aa):**

White solid, 92% yield, 75% *ee*, m.p. 133.7-137.4 °C;  $[\alpha]_{\text{D}}^{20} = +42.6$  ( $c = 0.5$ ,  $\text{CH}_2\text{Cl}_2$ ). The *ee* was determined by HPLC on Chiralpak IA-H column, hexane: isopropanol = 90:10; flow rate = 1 mL/min; column temperature 25 °C; UV detection at 215 nm;  $t_{\text{R}1} = 24.32$  min (minor),  $t_{\text{R}2} = 29.79$  min (major).  $^1\text{H}$  NMR (400 MHz,  $\text{CDCl}_3$ )  $\delta$  7.95 (d,  $J = 8.0$  Hz, 2H), 7.73 (t,  $J = 7.6$  Hz, 1H), 7.65 – 7.56 (m, 4H), 7.43 (d,  $J = 8.0$  Hz, 2H),

5.26 (s, 1H), 4.38 (s, 1H), 1.37 (s, 3H), 0.95 (s, 3H).  $^{13}\text{C}$  NMR (100 MHz,  $\text{CDCl}_3$ )  $\delta$  142.0, 134.7, 134.3, 130.5 (q,  $J = 32.3$  Hz), 130.5, 129.1, 128.4, 124.9 (q,  $J = 3.8$  Hz), 123.9 (q,  $J = 270.5$  Hz), 74.2, 66.3, 21.5, 14.0.  $^{19}\text{F}$  NMR (376 MHz,  $\text{CDCl}_3$ )  $\delta$ -62.60. HRMS (ESI) calcd for  $\text{C}_{17}\text{H}_{18}\text{F}_3\text{O}_3\text{S}$   $[\text{M}+\text{H}]^+$ : 359.0923, found: 359.0924.

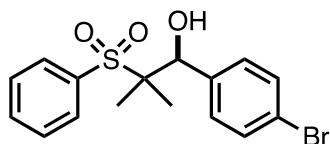

**1-(4-Bromophenyl)-2-methyl-2-(phenylsulfonyl)propan-1-ol (2ab):**

White solid, 93% yield, 81% *ee*, m.p. 131.2-135.4 °C;  $[\alpha]_{\text{D}}^{20} = +22.6$  ( $c = 0.5$ ,  $\text{CH}_2\text{Cl}_2$ ). The *ee* was determined by HPLC on Chiralpak OJ-H column, hexane: isopropanol = 90:10; flow rate = 1 mL/min; column temperature 25 °C; UV detection at 210 nm;  $t_{\text{R}1} = 25.92$  min (minor),  $t_{\text{R}2} = 32.89$  min (major).  $^1\text{H}$  NMR (400 MHz,  $\text{CDCl}_3$ )  $\delta$  7.95 (d,  $J = 7.2$  Hz, 2H), 7.73 (t,  $J = 7.6$  Hz, 1H), 7.62 (t,  $J = 8.0$  Hz, 2H), 7.44 (d,  $J = 8.4$  Hz, 2H), 7.18 (d,  $J = 8.4$  Hz, 2H), 5.15 (s, 1H), 4.31 (s, 1H), 1.36 (s, 3H), 0.93 (s, 3H).  $^{13}\text{C}$  NMR (100 MHz,  $\text{CDCl}_3$ )  $\delta$  136.9, 134.6, 134.3, 131.1, 130.4, 129.6, 129.1, 122.3, 74.1, 66.3, 21.5, 13.9. HRMS (ESI) calcd for  $\text{C}_{16}\text{H}_{18}\text{BrO}_3\text{S}$   $[\text{M}+\text{H}]^+$ : 369.0155, found: 369.0156.

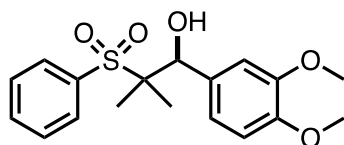

**1-(3,4-Dimethoxyphenyl)-2-methyl-2-(phenylsulfonyl)propan-1-ol (2ac):**

White solid, 92% yield, 86% *ee*, m.p. 148.5-151.5 °C;  $[\alpha]_{\text{D}}^{20} = +26.0$  ( $c = 0.5$ ,  $\text{CH}_2\text{Cl}_2$ ). The *ee* was determined by HPLC on Chiralpak IA-H column, hexane: isopropanol = 90:10; flow rate = 1 mL/min; column temperature 25 °C; UV detection at 215 nm;  $t_{\text{R}1} = 14.06$  min (major),  $t_{\text{R}2} = 21.08$  min (minor).  $^1\text{H}$  NMR (400 MHz,  $\text{CDCl}_3$ )  $\delta$  7.94 (d,  $J = 7.6$  Hz, 2H), 7.71 (t,  $J = 7.6$  Hz, 1H), 7.60 (t,  $J = 8.0$  Hz, 2H), 6.87 (s, 1H), 6.77 (s, 2H), 5.16 (s, 1H), 4.19 (d,  $J = 1.2$  Hz, 1H), 3.84 (d,  $J = 2.8$  Hz, 6H), 1.39 (s, 3H), 0.93 (s, 3H).  $^{13}\text{C}$  NMR (100 MHz,  $\text{CDCl}_3$ )  $\delta$  148.9, 148.5, 135.0, 134.100, 128.9, 120.5, 110.9, 110.3, 74.4, 66.8, 55.9, 55.8, 21.5, 14.1. HRMS (ESI) calcd for  $\text{C}_{18}\text{H}_{23}\text{O}_5\text{S}$   $[\text{M}+\text{H}]^+$ : 351.1261, found: 351.1262.

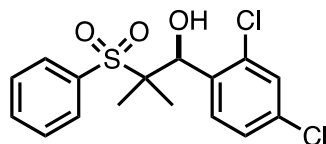

**1-(2,4-Dichlorophenyl)-2-methyl-2-(phenylsulfonyl)propan-1-ol (2ad):**

White solid, 92% yield, 95% *ee*, m.p. 110.0-112.6 °C;  $[\alpha]_D^{20} = +33.4$  ( $c = 0.5$ , CH<sub>2</sub>Cl<sub>2</sub>). The *ee* was determined by HPLC on Chiralpak IA-H column, hexane: isopropanol = 90:10; flow rate = 1 mL/min; column temperature 25 °C; UV detection at 215 nm;  $t_{R1} = 15.17$  min (major),  $t_{R2} = 45.01$  min (minor). <sup>1</sup>H NMR (400 MHz, CDCl<sub>3</sub>)  $\delta$  8.00 – 7.94 (m, 2H), 7.75 – 7.70 (m, 1H), 7.66 – 7.60 (m, 1H), 7.56 (d,  $J = 8.4$  Hz, 1H), 7.31 – 7.26 (m, 2H), 5.72 (s, 1H), 4.21 (s, 1H), 1.46 (s, 3H), 1.01 (s, 3H). <sup>13</sup>C NMR (100 MHz, CDCl<sub>3</sub>)  $\delta$  134.6, 134.6, 134.5, 134.3, 133.9, 130.5, 130.4, 129.1, 129.1, 127.3, 69.2, 67.3, 20.1, 13.8. HRMS (ESI) calcd for C<sub>16</sub>H<sub>17</sub>Cl<sub>2</sub>O<sub>3</sub>S [M+H]<sup>+</sup>: 359.0270, found: 359.0268.

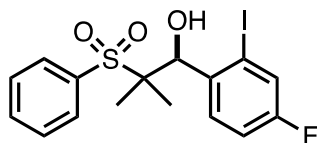

**1-(4-Fluoro-2-iodophenyl)-2-methyl-2-(phenylsulfonyl)propan-1-ol (2ae):**

White solid, 93% yield, 91% *ee*, m.p. 148.5-151.5 °C;  $[\alpha]_D^{20} = +36.2$  ( $c = 0.5$ , CH<sub>2</sub>Cl<sub>2</sub>). The *ee* was determined by HPLC on Chiralpak OJ-H column, hexane: isopropanol = 90:10; flow rate = 1 mL/min; column temperature 25 °C; UV detection at 215 nm;  $t_{R1} = 17.64$  min (minor),  $t_{R2} = 30.23$  min (major). <sup>1</sup>H NMR (400 MHz, CDCl<sub>3</sub>)  $\delta$  8.05 – 7.97 (m, 2H), 7.75 – 7.62 (m, 4H), 7.29 (dd,  $J = 10.0, 3.2$  Hz, 1H), 6.80 – 6.74 (m, 1H), 5.45 (s, 1H), 4.27 (d,  $J = 1.2$  Hz, 1H), 1.54 (s, 3H), 1.10 (s, 3H). <sup>13</sup>C NMR (100 MHz, CDCl<sub>3</sub>)  $\delta$  164.2, 161.7, 142.8 (d,  $J = 6.9$  Hz), 140.7 (d,  $J = 7.4$  Hz), 134.3, 130.8, 129.3, 117.7 (d,  $J = 21.7$  Hz), 116.8 (d,  $J = 23.3$  Hz), 92.4 (d,  $J = 3.2$  Hz), 76.4, 67.8, 20.8, 13.5. <sup>19</sup>F NMR (376 MHz, CDCl<sub>3</sub>)  $\delta$  -112.40. HRMS (ESI) calcd for C<sub>16</sub>H<sub>17</sub>FIO<sub>3</sub>S [M+H]<sup>+</sup>: 434.9922, found: 434.9924.

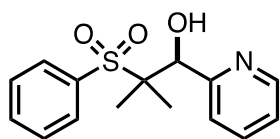

**2-Methyl-2-(phenylsulfonyl)-1-(pyridin-2-yl)propan-1-ol (2af):**

White solid, 92% yield, 59% *ee*, m.p. 109.9-112.4 °C;  $[\alpha]_D^{20} = -18.2$  ( $c = 0.5$ , CH<sub>2</sub>Cl<sub>2</sub>). The *ee* was determined by HPLC on Chiralpak OJ-H column, hexane: isopropanol = 90:10; flow rate = 1 mL/min; column temperature 25 °C; UV detection at 210 nm;  $t_{R1} = 99.40$  min (minor),  $t_{R2} = 110.00$  min (major). <sup>1</sup>H NMR (400 MHz, CDCl<sub>3</sub>)  $\delta$  8.48 (d,  $J = 4.4$  Hz, 1H), 8.00 – 7.93 (m, 2H), 7.71 – 7.65 (m, 2H), 7.57 (t,  $J = 8.0$  Hz, 2H), 7.46 (d,  $J = 8.0$  Hz, 1H), 7.24 – 7.19 (m, 1H), 5.17 (d,  $J = 4.0$  Hz, 1H), 4.54 (d,  $J = 4.4$  Hz, 1H), 1.37 (s, 3H), 1.12 (s, 3H). <sup>13</sup>C NMR (100 MHz, CDCl<sub>3</sub>)  $\delta$  157.6, 148.2, 136.3, 135.9, 133.9, 130.5, 128.8, 123.2, 123.2, 74.9, 67.2, 20.2, 15.1. HRMS (ESI) calcd for C<sub>15</sub>H<sub>18</sub>NO<sub>3</sub>S [M+H]<sup>+</sup>: 292.1002, found: 292.1003.

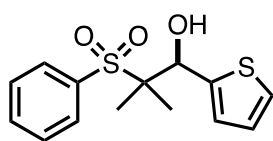

**2-Methyl-2-(phenylsulfonyl)-1-(thiophen-2-yl)propan-1-ol (2ag):**

White solid, 91% yield, 66% *ee*, m.p. 150.0-152.9 °C;  $[\alpha]_D^{20} = -20.4$  ( $c = 0.5$ , CH<sub>2</sub>Cl<sub>2</sub>). The *ee* was determined by HPLC on Chiralpak OJ-H column, hexane: isopropanol = 90:10; flow rate = 1 mL/min; column temperature 25 °C; UV detection at 210 nm;  $t_{R1} = 60.36$  min (minor),  $t_{R2} = 65.85$  min (major). <sup>1</sup>H NMR (400 MHz, CDCl<sub>3</sub>)  $\delta$  7.98 – 7.91 (m, 2H), 7.72 (t,  $J = 7.6$  Hz, 1H), 7.61 (t,  $J = 7.6$  Hz, 2H), 7.30 – 7.25 (d,  $J = 4.8$  Hz, 1H), 6.98 – 6.88 (m, 2H), 5.50 (s, 1H), 4.29 (d,  $J = 0.8$  Hz, 1H), 1.49 (s, 3H), 1.03 (s, 3H). <sup>13</sup>C NMR (100 MHz, CDCl<sub>3</sub>)  $\delta$  140.9, 134.8, 134.3, 130.4, 129.0, 126.5, 126.1, 125.6, 71.8, 66.5, 21.3, 14.2. HRMS (ESI) calcd for C<sub>14</sub>H<sub>17</sub>O<sub>3</sub>S<sub>2</sub> [M+H]<sup>+</sup>: 297.0614, found: 297.0615.

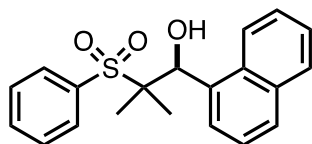

**2-Methyl-1-(naphthalen-1-yl)-2-(phenylsulfonyl)propan-1-ol (2ah):**

White solid, 90% yield, 43% *ee*, m.p. 218.8-221.9 °C;  $[\alpha]_D^{20} = -48.4$  ( $c = 0.5$ , CH<sub>2</sub>Cl<sub>2</sub>). The *ee* was determined by HPLC on Chiralpak OJ-H column, hexane: isopropanol = 90:10; flow rate = 1 mL/min; column temperature 25 °C; UV detection at 210 nm;  $t_{R1} = 57.71$  min (minor),  $t_{R2} = 71.18$  min (major). <sup>1</sup>H NMR (400 MHz, CDCl<sub>3</sub>)  $\delta$  8.05 – 8.00 (m, 2H), 7.88 – 7.71 (m, 2H), 7.66 (t,  $J = 7.6$  Hz, 2H), 7.51 (t,  $J = 8.0$  Hz, 1H), 7.46 – 7.37 (m, 2H), 6.41 (s, 1H), 4.07 (s, 1H), 1.52 (s, 3H), 0.83 (s, 3H). <sup>13</sup>C NMR



(100 MHz, CDCl<sub>3</sub>)  $\delta$  135.0, 134.3, 134.2, 133.4, 131.5, 130.6, 129.1, 128.9, 128.8, 126.1, 125.8, 125.4, 125.2, 68.0, 67.6, 21.6, 14.4. HRMS (ESI) calcd for C<sub>20</sub>H<sub>21</sub>O<sub>3</sub>S [M+H]<sup>+</sup>: 341.1206 found: 241.1208.

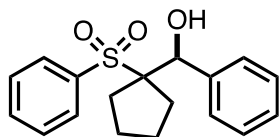

### Phenyl(1-(phenylsulfonyl)cyclopentyl)methanol (**2ai**):

White solid, 91% yield, 80% *ee*, m.p. 88.2-90.8 °C;  $[\alpha]_D^{20} = +18.4$  (*c* = 0.5, CH<sub>2</sub>Cl<sub>2</sub>). The *ee* was determined by HPLC on Chiralpak OJ-H column, hexane: isopropanol = 90:10; flow rate = 1 mL/min; column temperature 25 °C; UV detection at 210 nm; *t*<sub>R1</sub> = 22.08 min (minor), *t*<sub>R2</sub> = 46.31 min (major). <sup>1</sup>H NMR (400 MHz, CDCl<sub>3</sub>)  $\delta$  8.06 – 7.97 (m, 2H), 7.77 – 7.69 (m, 1H), 7.67 – 7.58 (m, 2H), 7.26 (s, 5H), 5.11 (s, 1H), 4.50 (s, 1H), 2.46 (t, *J* = 6.8 Hz, 2H), 2.09 – 1.96 (m, 1H), 1.55 – 1.47 (m, 1H), 1.38 – 1.28 (m, 3H), 0.33 – 0.18 (m, 1H). <sup>13</sup>C NMR (100 MHz, CDCl<sub>3</sub>)  $\delta$  137.9, 135.6, 134.1, 130.3, 129.1, 128.3, 128.1, 127.9, 76.9, 74.2, 32.6, 26.1, 25.9, 25.5. HRMS (ESI) calcd for C<sub>18</sub>H<sub>21</sub>O<sub>3</sub>S [M+H]<sup>+</sup>: 317.1206, found: 317.1205.

## 5. General procedure for gram-scale reaction and functional group transformations

### Gram-scale reaction

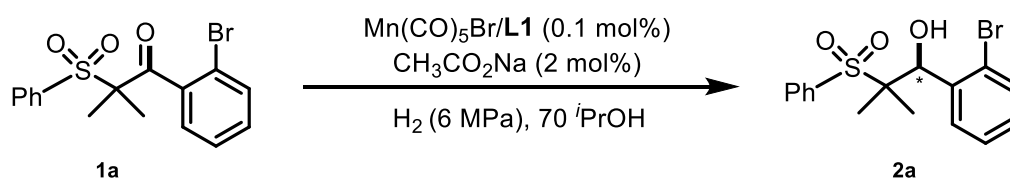

Under argon atmosphere, Mn(CO)<sub>5</sub>Br (0.02 mmol), **L1** (0.022 mmol), degassed toluene (2 mL) was added into a tube and the mixture was heated to reflux for 10 h. The mixture was cooled to room temperature and concentrated to dryness, then 2 mL of degassed dried *i*PrOH was added to the crude Mn-**L1** complex. Under an argon atmosphere, a vial was charged with a solution of Mn-**L1** complex in *i*PrOH (0.5 mL, 0.005 mmol), CH<sub>3</sub>COONa (0.1 mmol), **1a** (5 mmol) and 15 mL of degassed dried *i*PrOH. The vial was placed in an alloy plate which was then placed into the autoclave. And the autoclave was purged five times with hydrogen, then pressurized to 6 MPa,

stirred at 70 °C for 24 h. After slowly releasing the hydrogen pressure, the solvent was removed, and the mixture was purified by passing through a short column of silica gel to afford the corresponding alcohol **2a** with 1.84 g, 90% yield in 93% *ee*.

## Functional group transformations

### (1) The synthesis of **3a**

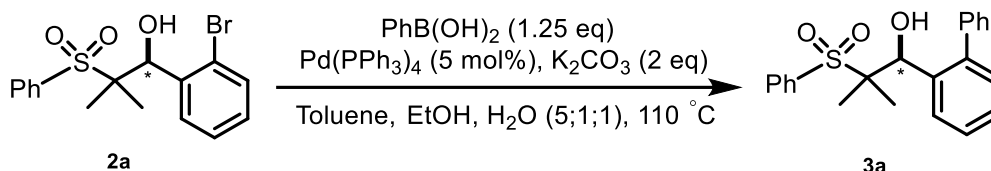

Under N<sub>2</sub> atmosphere, a solution of **2a** (1 mmol),  $\text{PhB(OH)}_2$  (1.25 mmol),  $\text{Pd(PPh}_3)_4$  (0.05 mmol) and  $\text{K}_2\text{CO}_3$  (2 mmol) in a mixture solvents of toluene: EtOH: H<sub>2</sub>O (10 mL: 2 mL: 2 mL) was stirred at 110 °C for 6 h. The solvent was removed under vacuum and 20 mL water and 15 mL DCM were added, organic layer was combined and dried by anhydrous sodium sulfate. The reaction mixture was filtered and concentrated to get the crude product **3a**. The crude product **3a** was purified by column chromatography on silica gel to get white solid, 87% yield, 93% *ee*.

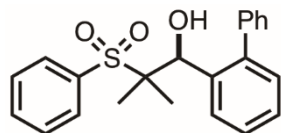

### 1-([1,1'-Biphenyl]-2-yl)-2-methyl-2-(phenylsulfonyl)propan-1-ol (**3a**):

White solid, 87% yield, 93% *ee*, m.p. 172.9-175.6 °C;  $[\alpha]_D^{20} = +33.4$  ( $c = 0.5$ ,  $\text{CH}_2\text{Cl}_2$ ). The *ee* was determined by HPLC on Chiralpak OJ-H column, hexane: isopropanol = 90:10; flow rate = 1 mL/min; column temperature 25 °C; UV detection at 210 nm;  $t_{R1} = 21.42$  min (minor),  $t_{R2} = 45.66$  min (major). <sup>1</sup>H NMR (400 MHz,  $\text{CDCl}_3$ )  $\delta$  7.74 (d,  $J = 7.6$  Hz, 1H), 7.68 – 7.61 (m, 2H), 7.57 (t,  $J = 7.2$  Hz, 1H), 7.45 – 7.36 (m, 3H), 7.34 – 7.29 (m, 1H), 7.18 – 7.09 (m, 4H), 7.08 – 7.00 (m, 2H), 5.38 (s, 1H), 4.35 (s, 1H), 1.56 (s, 3H), 0.58 (s, 3H). <sup>13</sup>C NMR (100 MHz,  $\text{CDCl}_3$ )  $\delta$  142.0, 140.9, 135.1, 134.0, 133.8, 130.1, 129.9, 129.0, 128.8, 128.1, 128.1, 128.0, 127.3, 126.8, 69.2, 67.9, 20.9, 12.7. HRMS (ESI) calcd for  $\text{C}_{22}\text{H}_{23}\text{O}_3\text{S}$   $[\text{M}+\text{H}]^+$ : 367.1362, found: 367.1358.

## (2) The synthesis of **5a**

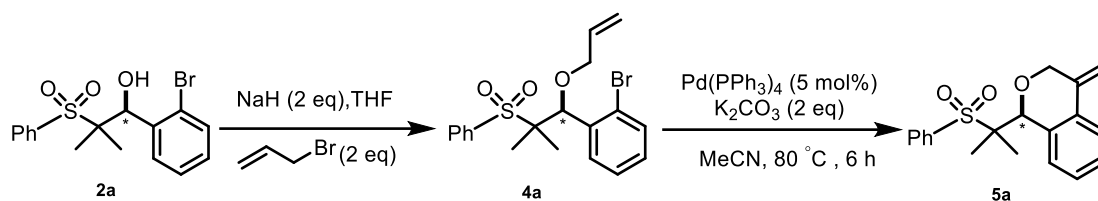

Under N<sub>2</sub> atmosphere, NaH (2 mmol) was added to a solution of **2a** (1 mmol) in 10 mL dry THF at 0 °C, then the mixture was stirred at room temperature for 1 h. Next, allyl bromide (2 mmol) was added at 0 °C and the mixture was stirred at room temperature for another 5 h. The solvent was removed under vacuum and 20 mL water and 15 mL DCM were added, organic layer was combined and dried by anhydrous sodium sulfate. The reaction mixture was filtered and concentrated to get the crude product **4a**. The crude product **4a** was purified by column chromatography on silica gel to get a white solid, 0.389 mg, 95% yield, 89% *ee*.

Under N<sub>2</sub> atmosphere, a solution of **4a** (0.5 mmol), Pd(PPh<sub>3</sub>)<sub>4</sub> (0.025 mmol), K<sub>2</sub>CO<sub>3</sub> (1 mmol) in MeCN was stirred at 80 °C for 6 h. The reaction mixture was filtered and concentrated to get the crude product **5a**. The crude product **5a** was purified by column chromatography on silica gel to get a white solid, 107 mg, 65% yield, 89% *ee*.

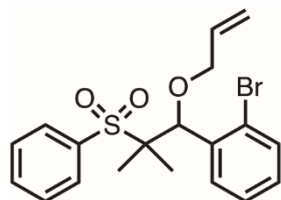

### 1-(1-(Allyloxy)-2-methyl-2-(phenylsulfonyl)propyl)-2-bromobenzene (**4a**):

White solid, 95% yield, 89% *ee*, m.p. 157.6-160.3 °C; [ $\alpha$ ]<sub>D</sub><sup>20</sup> = +28.6 (c = 0.5, CH<sub>2</sub>Cl<sub>2</sub>). The *ee* was determined by HPLC on Chiralpak AD-H column, hexane: isopropanol = 98:2; flow rate = 0.5 mL/min; column temperature 25 °C; UV detection at 210 nm; t<sub>R1</sub> = 41.19 min (major), t<sub>R2</sub> = 43.72 min (minor). <sup>1</sup>H NMR (600 MHz, CDCl<sub>3</sub>) δ 7.98 – 7.92 (m, 2H), 7.63 – 7.58 (m, 1H), 7.57 – 7.53 (m, 1H), 7.53 – 7.49 (m, 2H), 7.35 – 7.32 (m, 1H), 7.31 – 7.27 (m, 1H), 7.18 – 7.14 (m, 1H), 5.60 – 5.49 (m, 2H), 5.00 – 4.90 (m, 2H), 3.72 – 3.66 (m, 1H), 3.60 – 3.53 (m, 1H), 1.43 (d, *J* = 1.2 Hz, 1H), 1.25 (d, *J* = 1.8 Hz, 1H). <sup>13</sup>C NMR (150 MHz, CDCl<sub>3</sub>) δ 138.8, 136.8, 133.6, 133.1, 133.0, 130.1, 129.8, 129.3, 128.4, 127.4, 125.6, 116.7, 79.2, 69.4, 19.0, 16.6. HRMS (ESI) calcd for C<sub>19</sub>H<sub>22</sub>BrO<sub>3</sub>S [M+H]<sup>+</sup>: 409.0468, found: 409.0467.

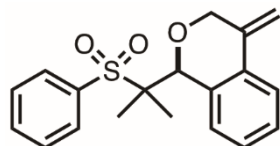

#### 4-Methylene-1-(2-(phenylsulfonyl)propan-2-yl)isochromane (5a):

White solid, 65% yield, 89% *ee*, m.p. 166.2-169.8 °C;  $[\alpha]_{\text{D}}^{20} = +45.9$  ( $c = 0.5$ ,  $\text{CH}_2\text{Cl}_2$ ). The *ee* was determined by HPLC on Chiralpak OJ-H column, hexane: isopropanol = 90:10; flow rate = 1 mL/min; column temperature 25 °C; UV detection at 210 nm;  $t_{\text{R}1} = 18.40$  min (major),  $t_{\text{R}2} = 21.83$  min (minor).  $^1\text{H}$  NMR (400 MHz,  $\text{CDCl}_3$ )  $\delta$  8.02 – 7.95 (m, 2H), 7.65 – 7.60 (m, 1H), 7.56 – 7.49 (m, 3H), 7.34 – 7.24 (m, 2H), 7.15 (dd,  $J = 7.2, 1.2$  Hz, 1H), 5.46 (s, 1H), 5.34 (s, 1H), 4.88 (s, 1H), 4.16 (s, 2H), 1.41 (s, 3H), 1.09 (s, 3H).  $^{13}\text{C}$  NMR (100 MHz,  $\text{CDCl}_3$ )  $\delta$  139.1, 138.8, 134.4, 133.0, 132.1, 130.7, 128.1, 127.9, 127.6, 127.4, 124.5, 108.2, 77.9, 70.8, 66.9, 20.7, 17.5. HRMS (ESI) calcd for  $\text{C}_{19}\text{H}_{21}\text{O}_3\text{S}$   $[\text{M}+\text{H}]^+$ : 329.1206, found: 329.1201.

## 6. References

- [1] (a) H. Nie, L. Yao, B. Li, S. Zhang and W. Chen, *Organometallics*, 2014, **33**, 2109; (b) W. Zeng, G.-Y. Chen, Y.-G. Zhou and Y.-X. Li, *J. Am. Chem. Soc.*, 2007, **129**, 750; (c) W. Wu, S. Liu, M. Duan, X. Tan, C. Chen, Y. Xie, Y. Lan, X.-Q. Dong and X. Zhang, *Org. Lett.*, 2016, **18**, 2938; (d) J. Ma, C. Li, D. Zhang, Y. Lei, M. Li, R. Jiang and W. Chen, *RSC Adv.*, 2015, **5**, 35888.
- [2] (a) W. Zhu, X. Zhai, Q. Fu, F. Guo, M. Bai, J. Wang, H. Wang and P. Gong, *Chem. Pharm. Bull.*, 2012, **60**, 1037; (b) K. Vishal, B. D. Fahlman, B. S. Sasidhar, S. A. Patil and S. A. Patil, *Catal. Lett.*, 2017, **147**, 900.
- [3] X. Kong, K. Yu, Q. Chen and B. Xu, *Asian J. Org. Chem.*, 2020, **9**, 1760.

## 7. Copies of NMR spectra

### (*Rc, Sp*)-*N*-2-Picolyl-1-(2-diphenylphosphino)ferrocenylethylamine (L1)

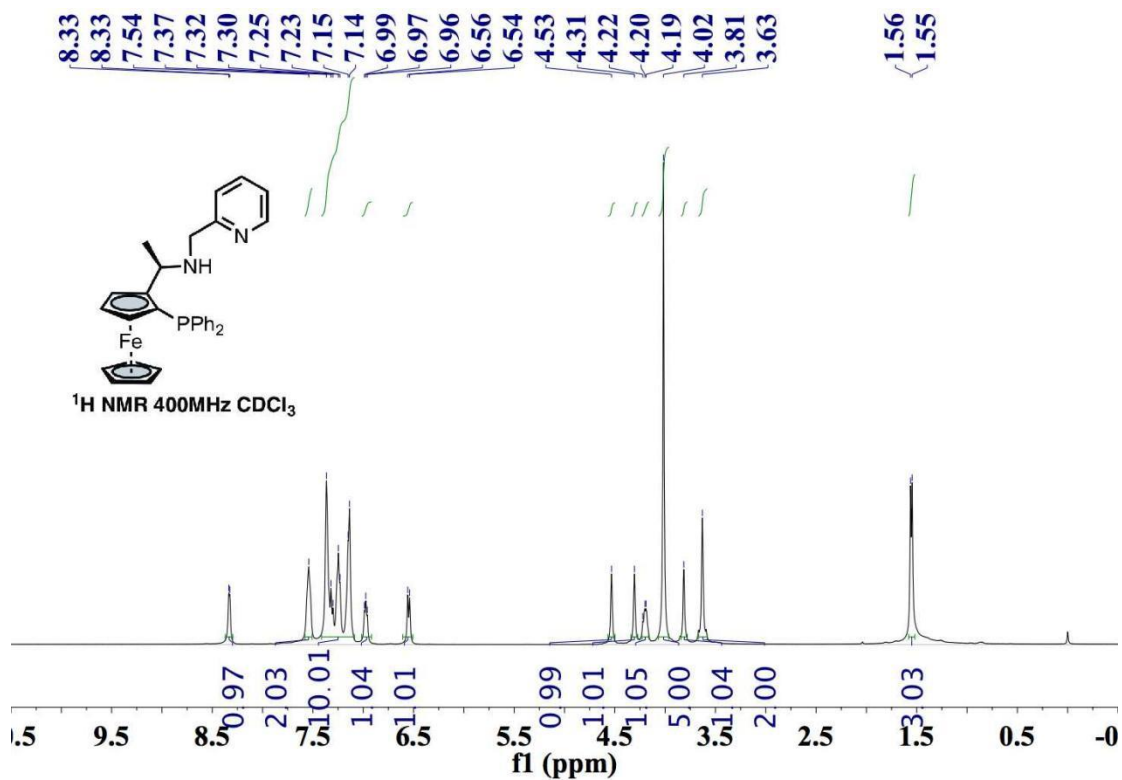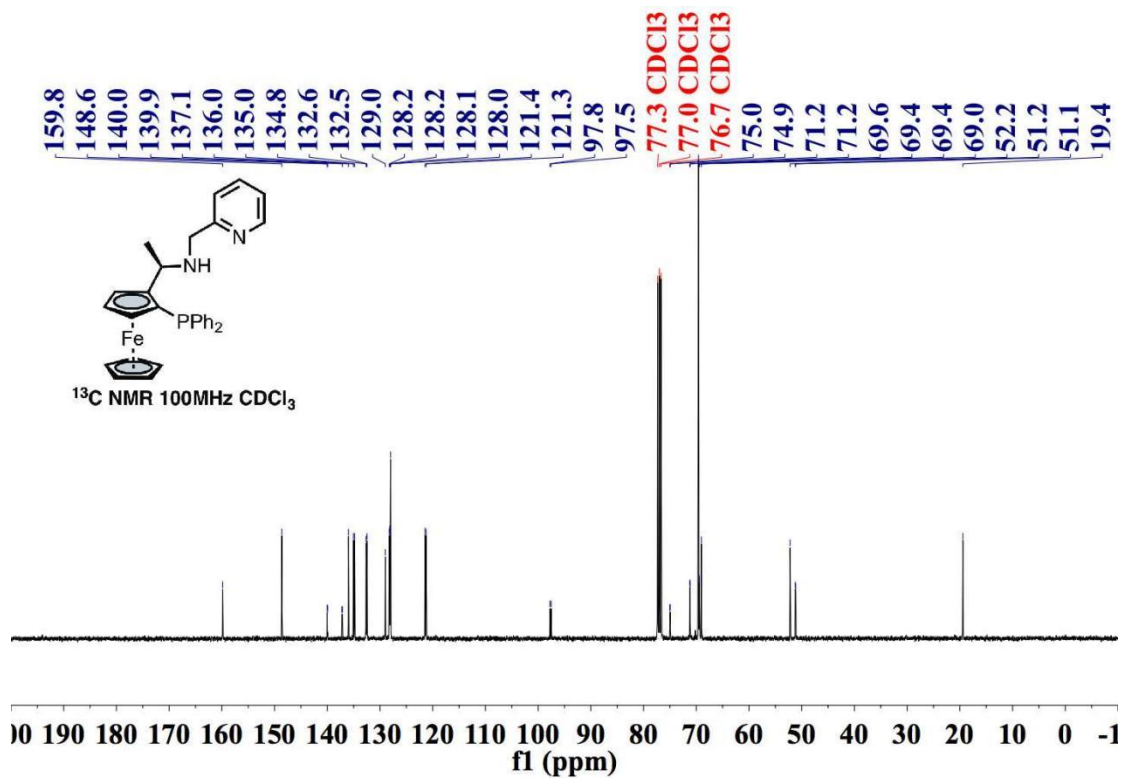

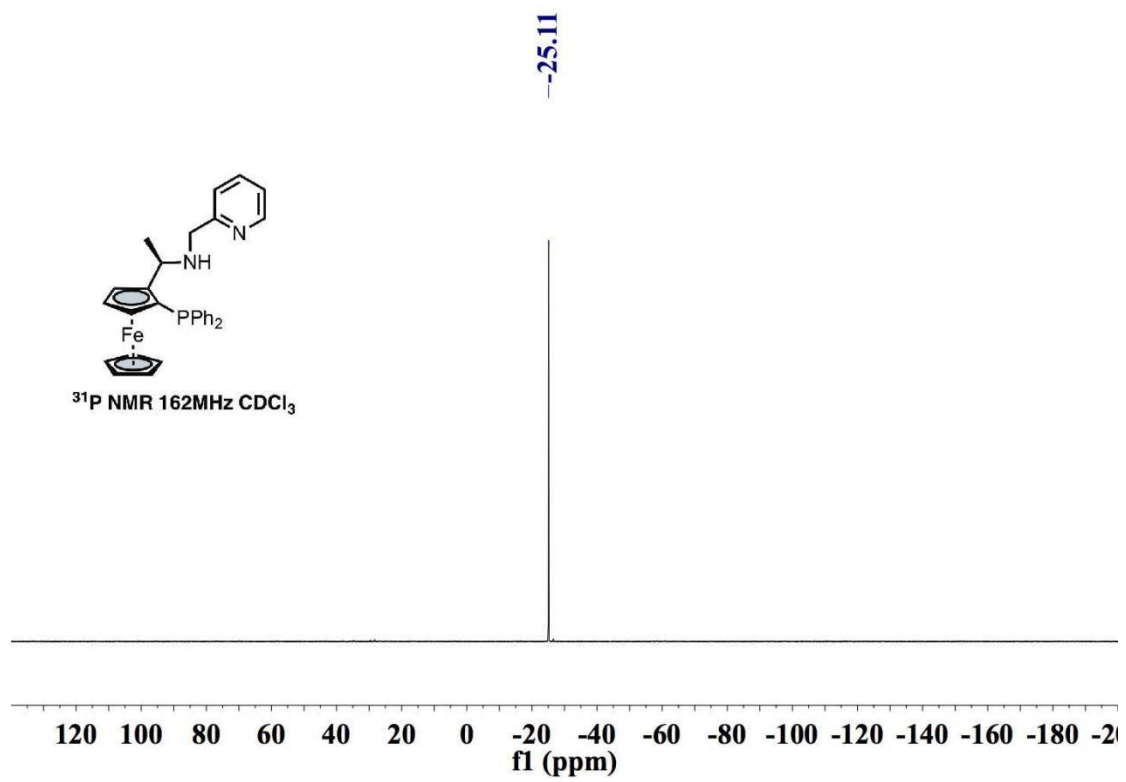

**(R<sub>c</sub>, S<sub>p</sub>)-N-2-(6-Methyl-picolyl)-1-(2-diphenylphosphino)ferrocenylethylamine**

**(L2)**

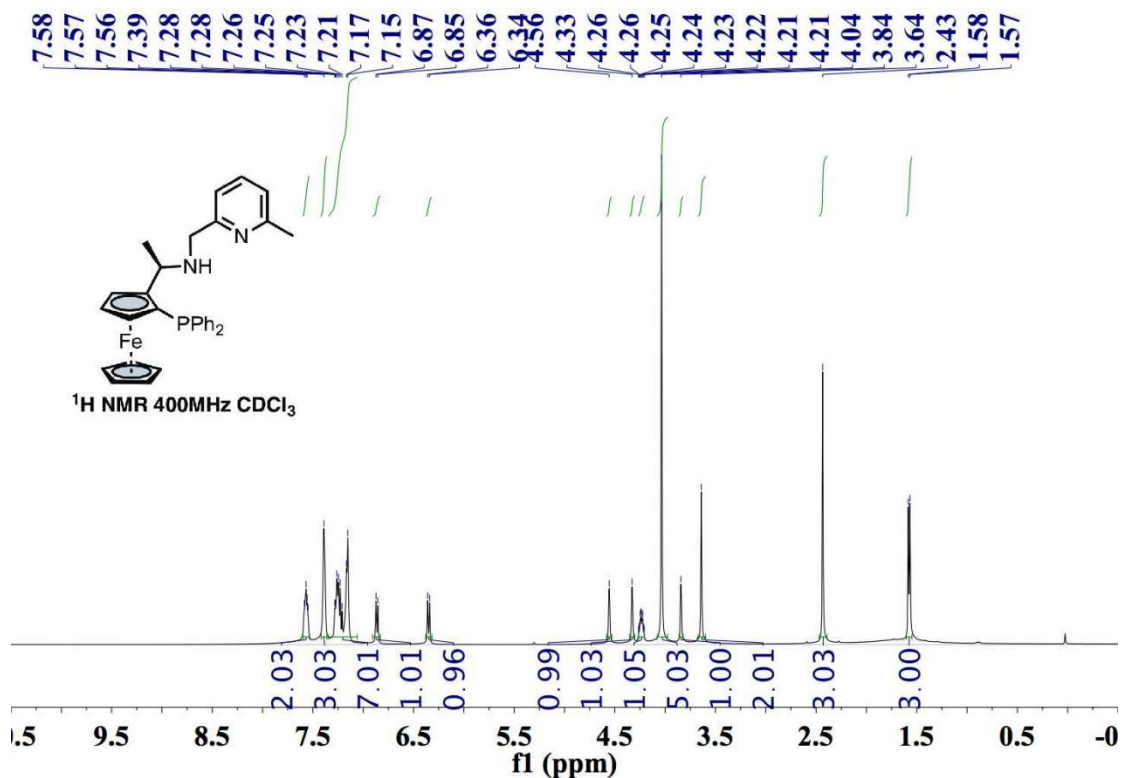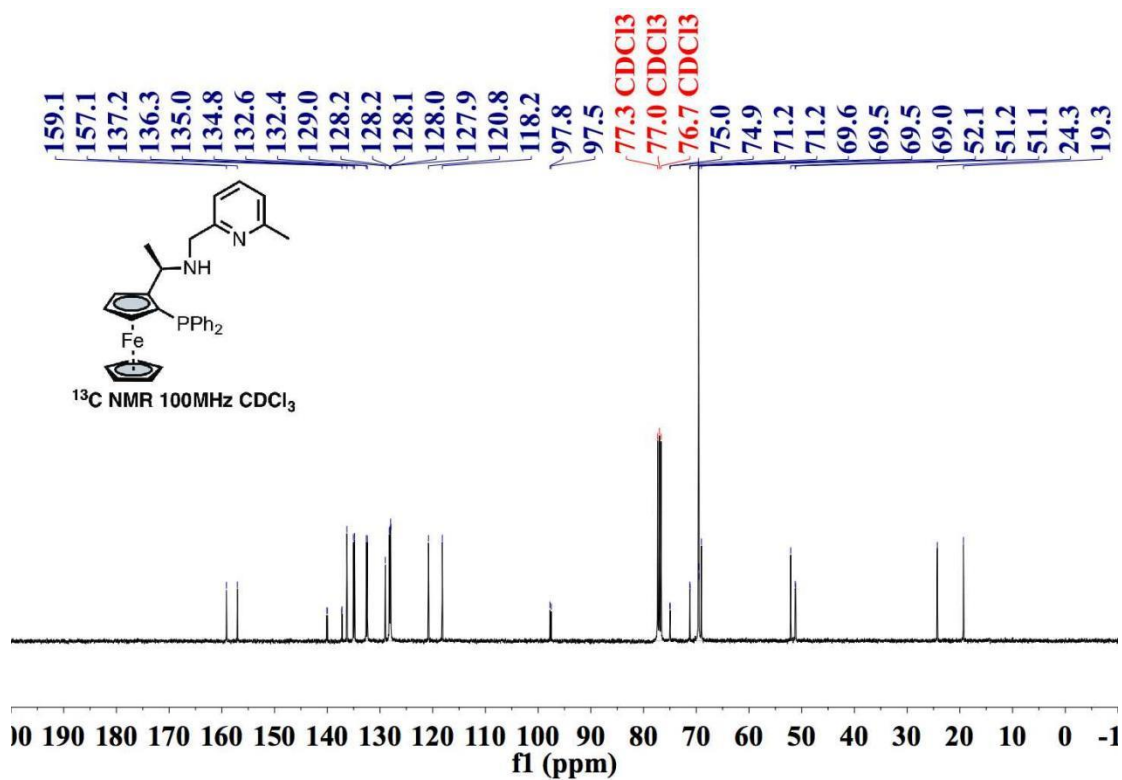

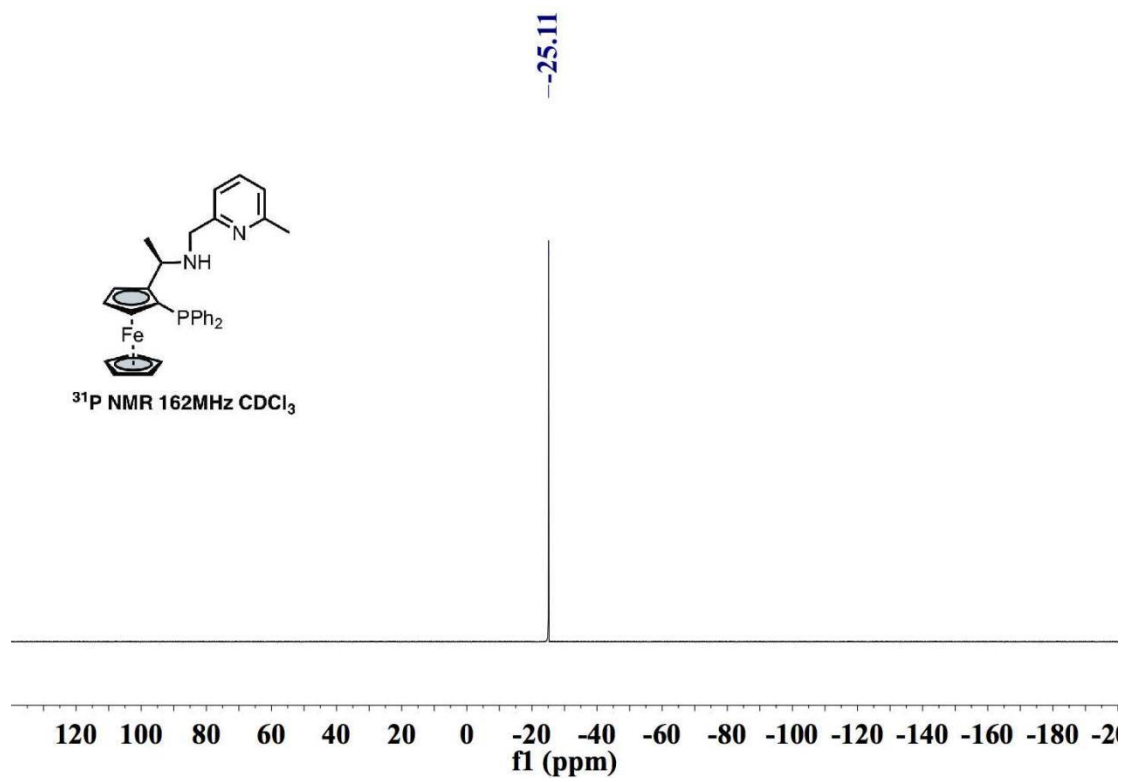



**(R<sub>c</sub>, S<sub>p</sub>)-N-2-(3-Diphenylmethyl-picolyl)-1-(2-Diphenylphosphino)ferrocenyl-ethylamine (L3)**

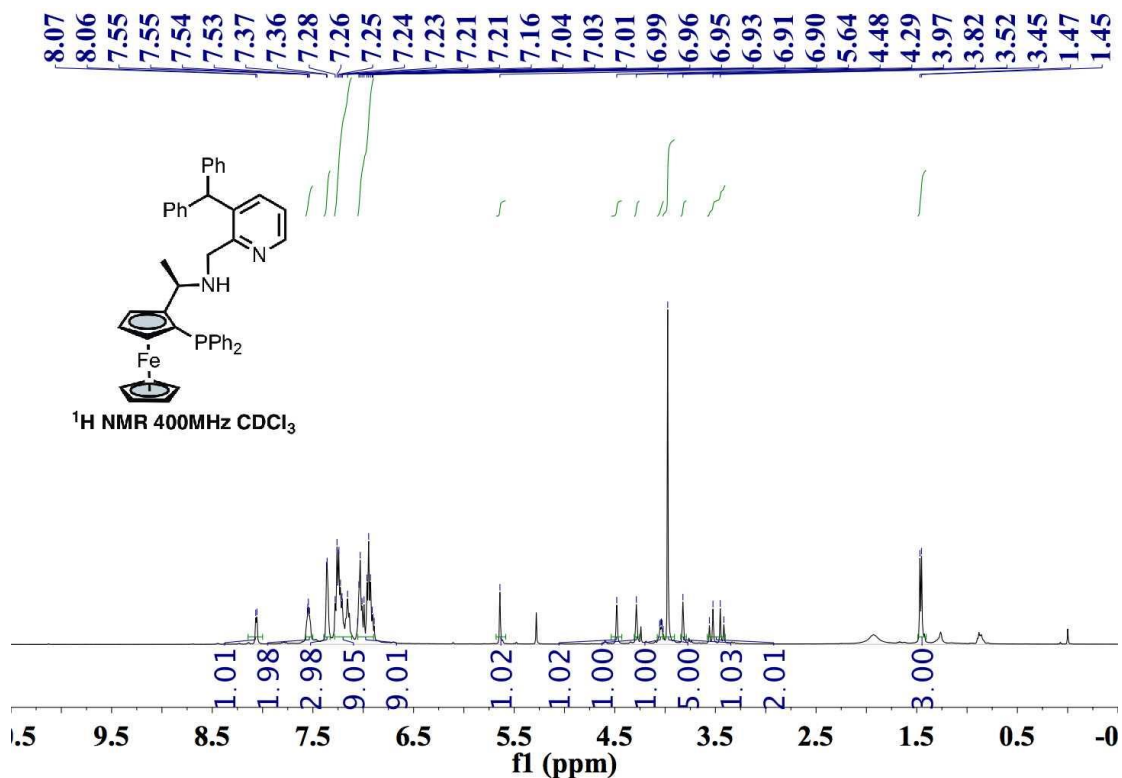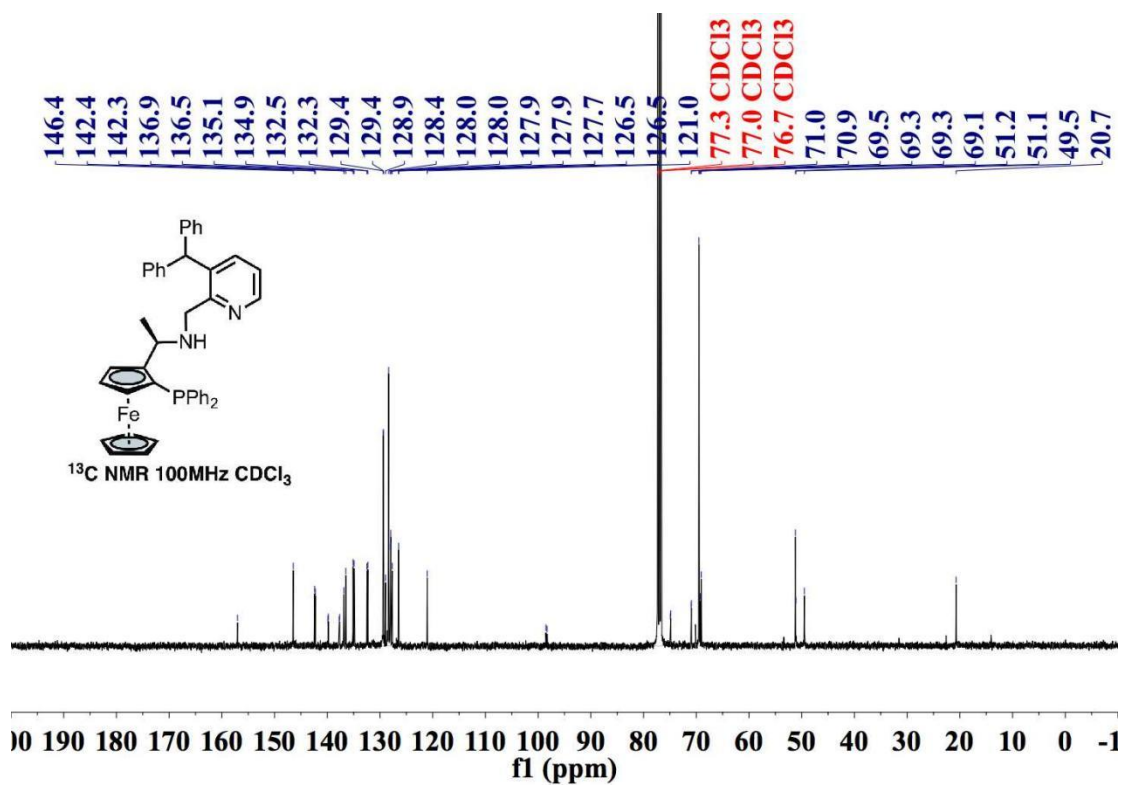

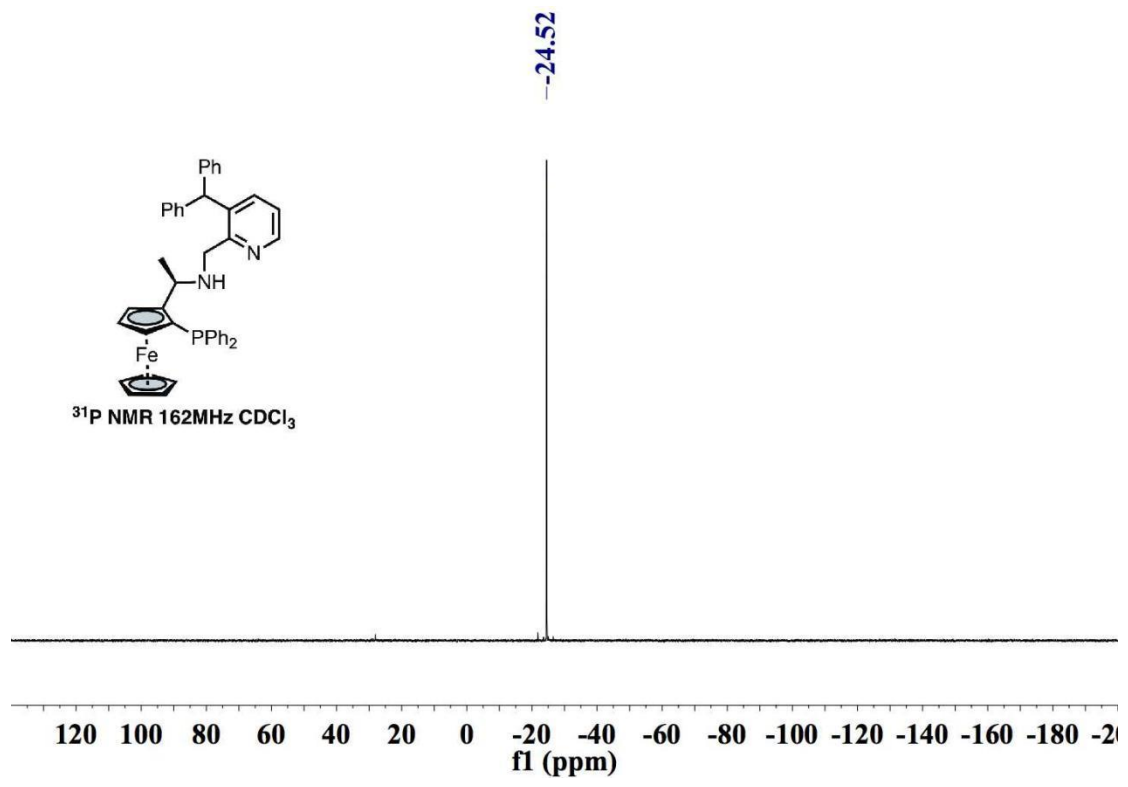

**(R<sub>c</sub>, S<sub>p</sub>)-N-((1H-Benzo[d]imidazol-2-yl)methyl)-1-(2-diphenylphosphino)-ferrocenylethylamine (L4)**

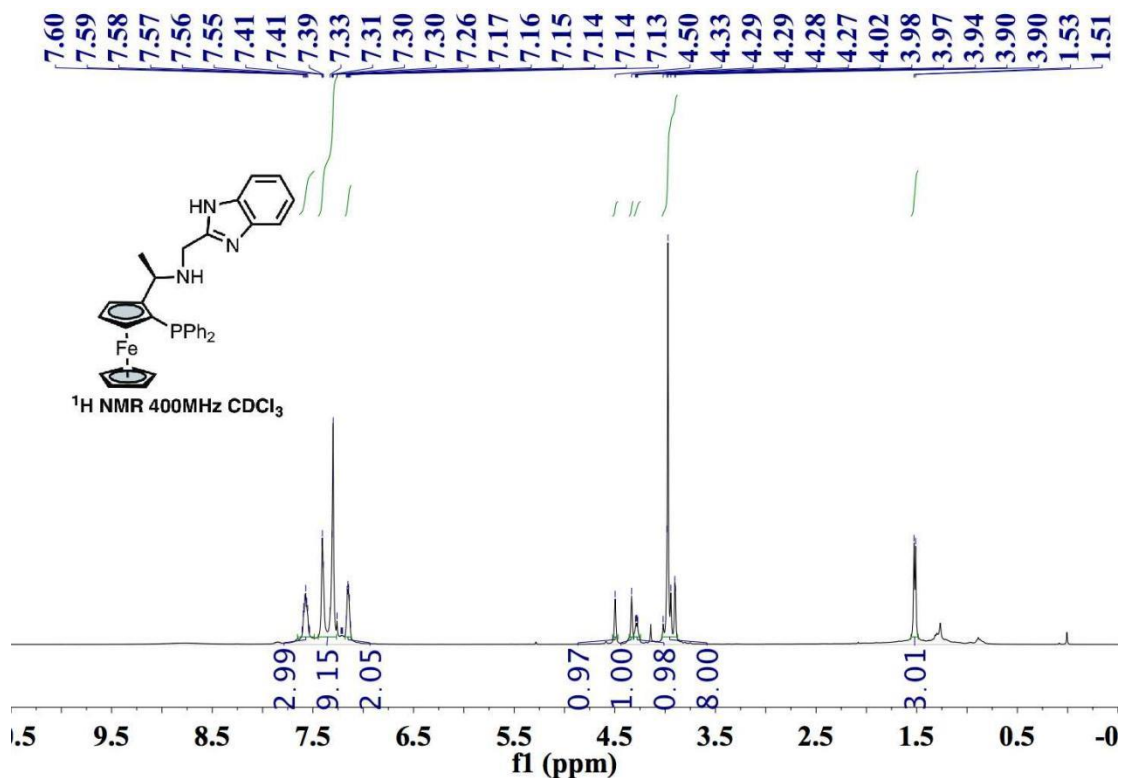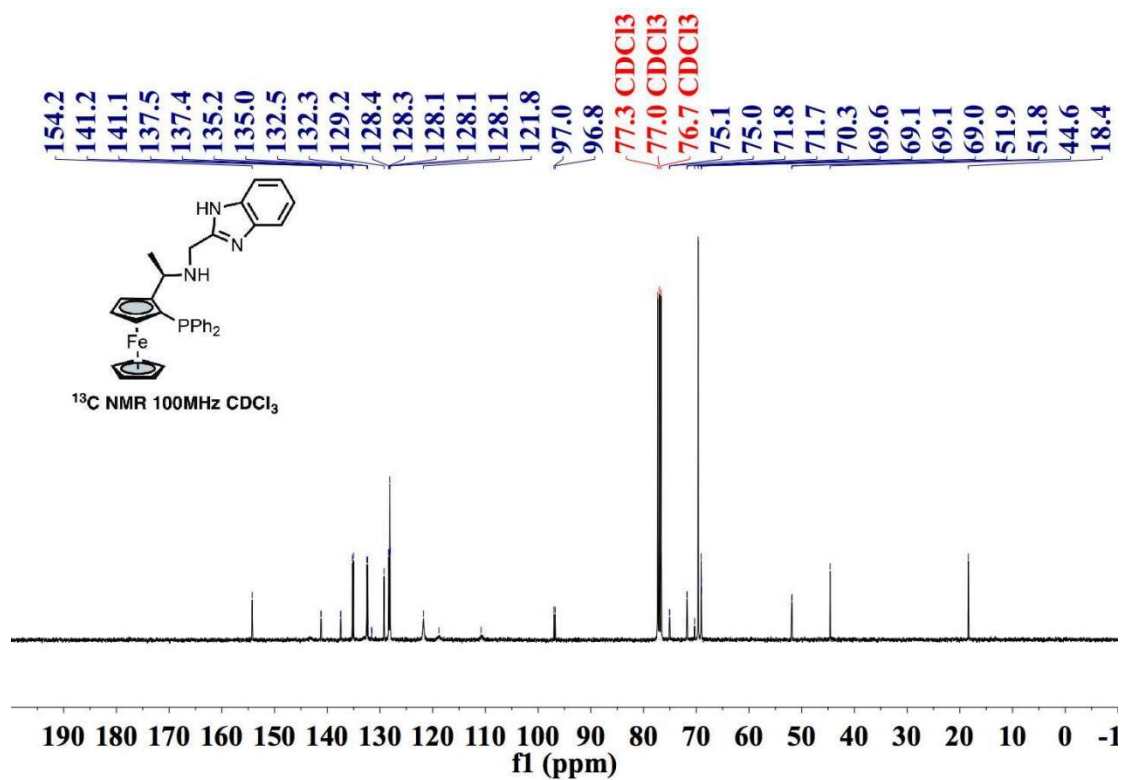

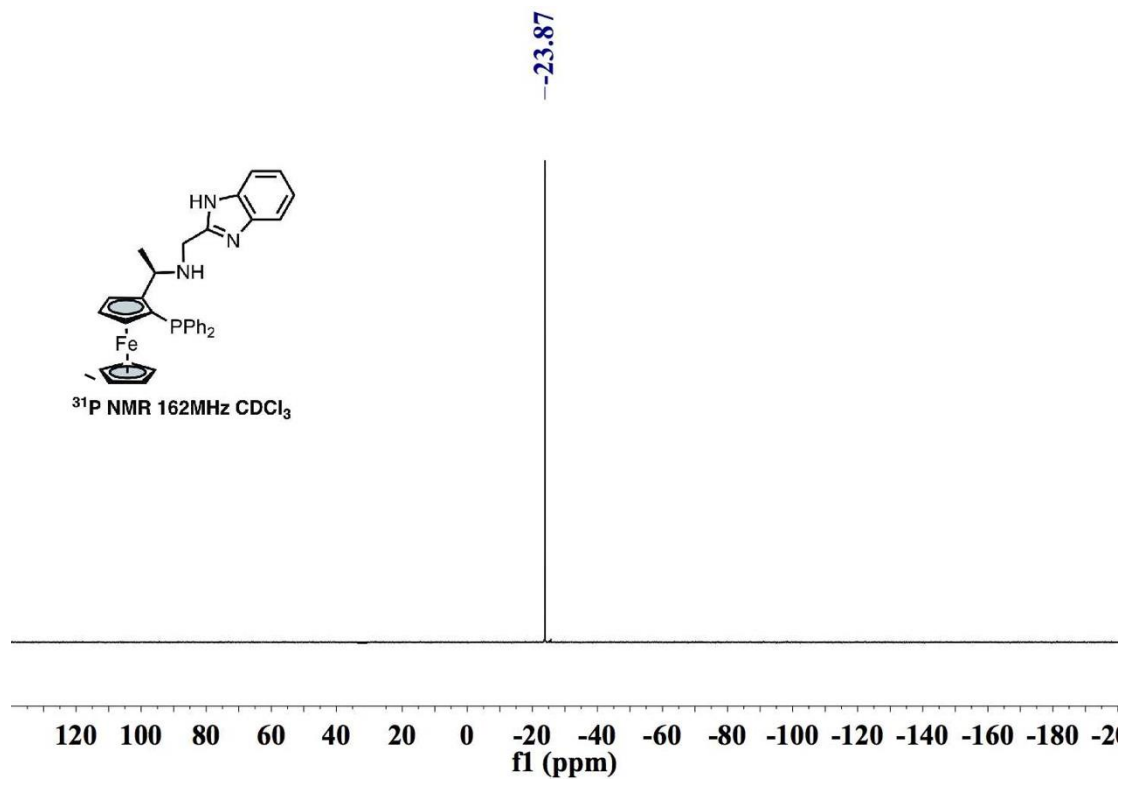

**(*Rc, Sp*)-*N*-((1,2,5,6-Tetramethyl-1*H*-benzo[d]imidazol-2-yl)methyl)-1-(2-diphenylphosphino)-ferrocenylethylamine (L5)**

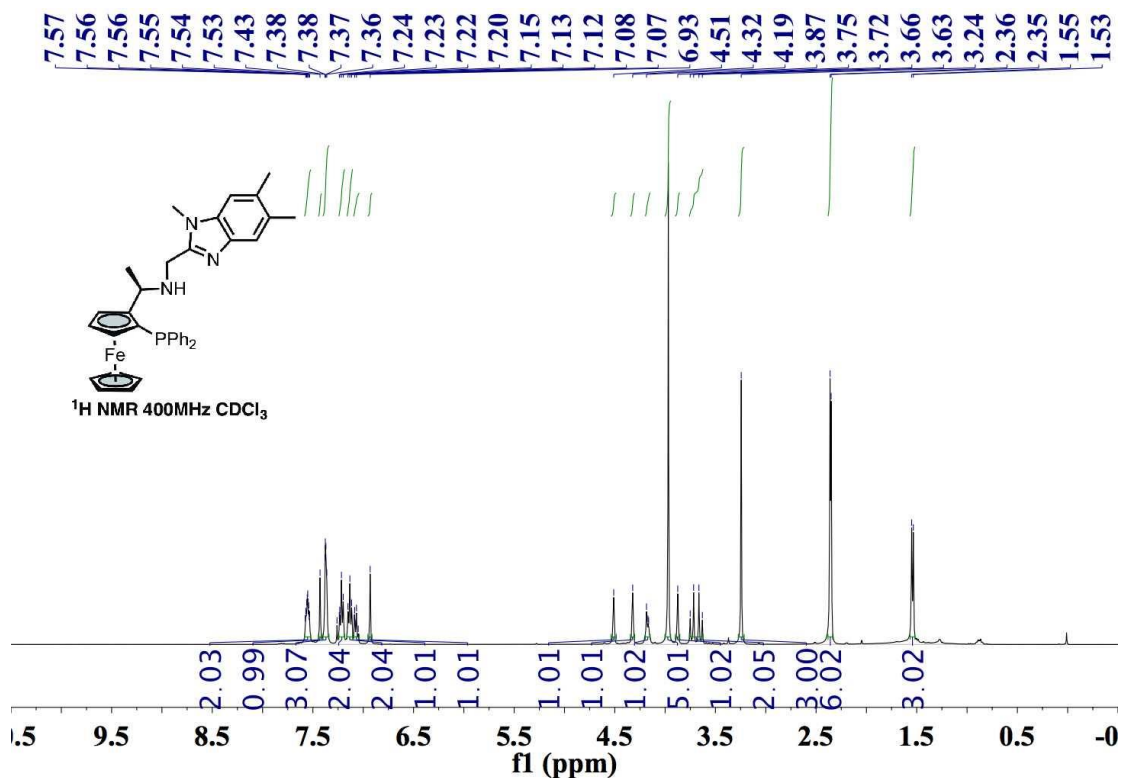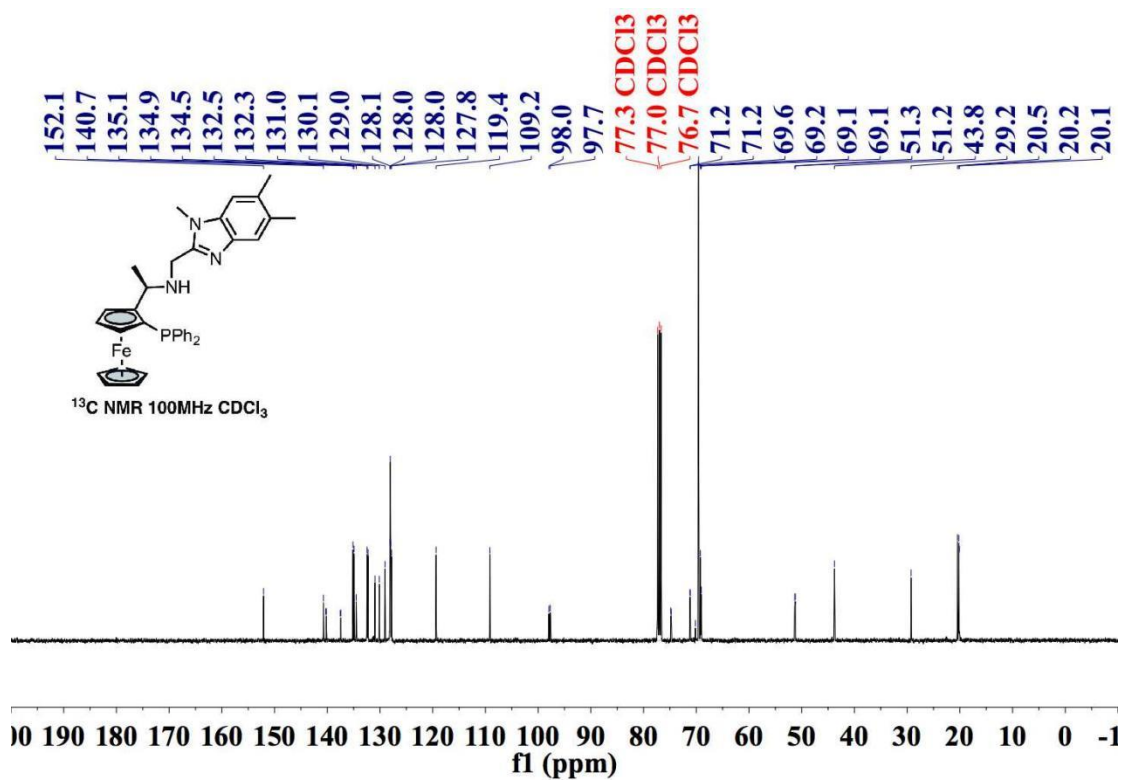

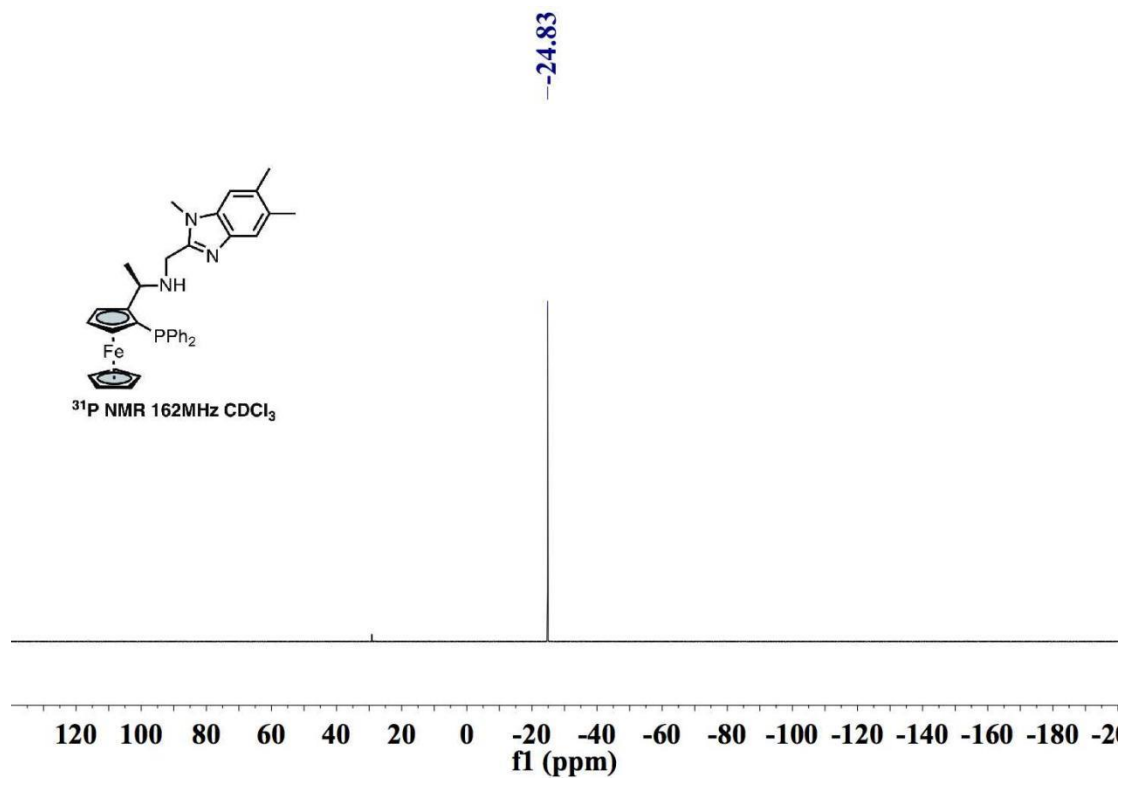

**(*Rc, Sp*)-*N*-((1,2-Dimethyl-4-phenyl-1*H*-benzo[d]imidazol-2-yl)methyl)-1-(2-diphenylphosphino)-ferrocenylethylamine (L6)**

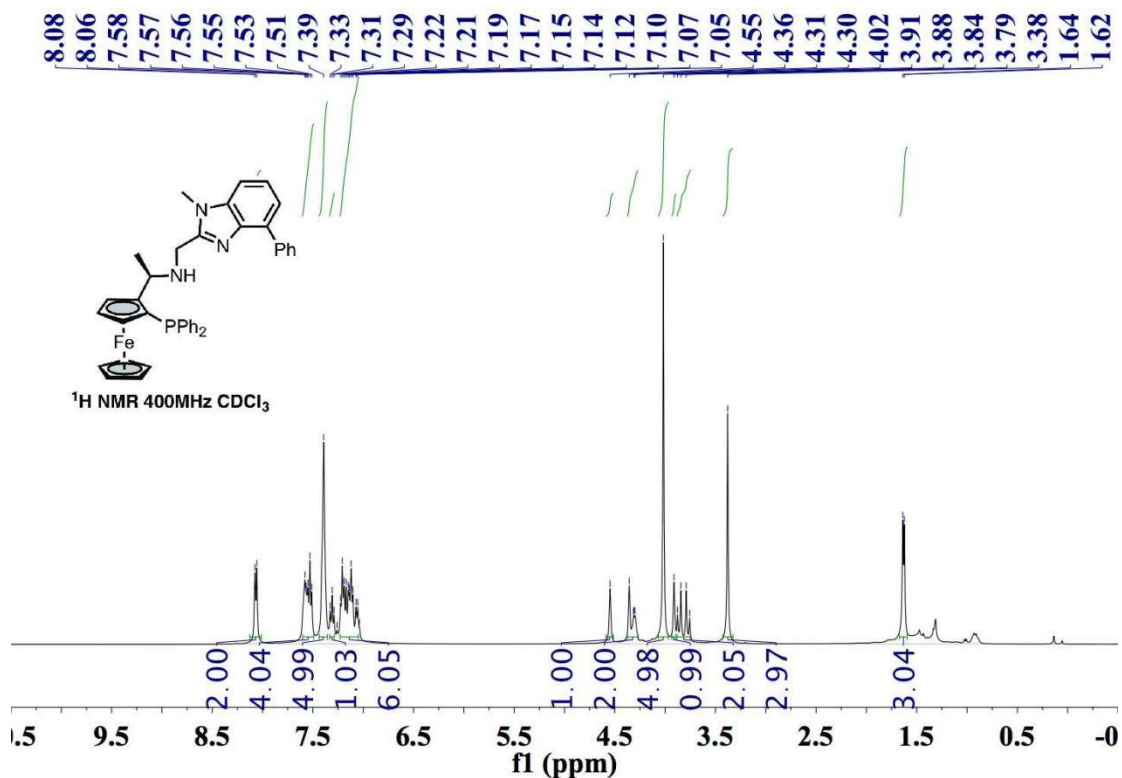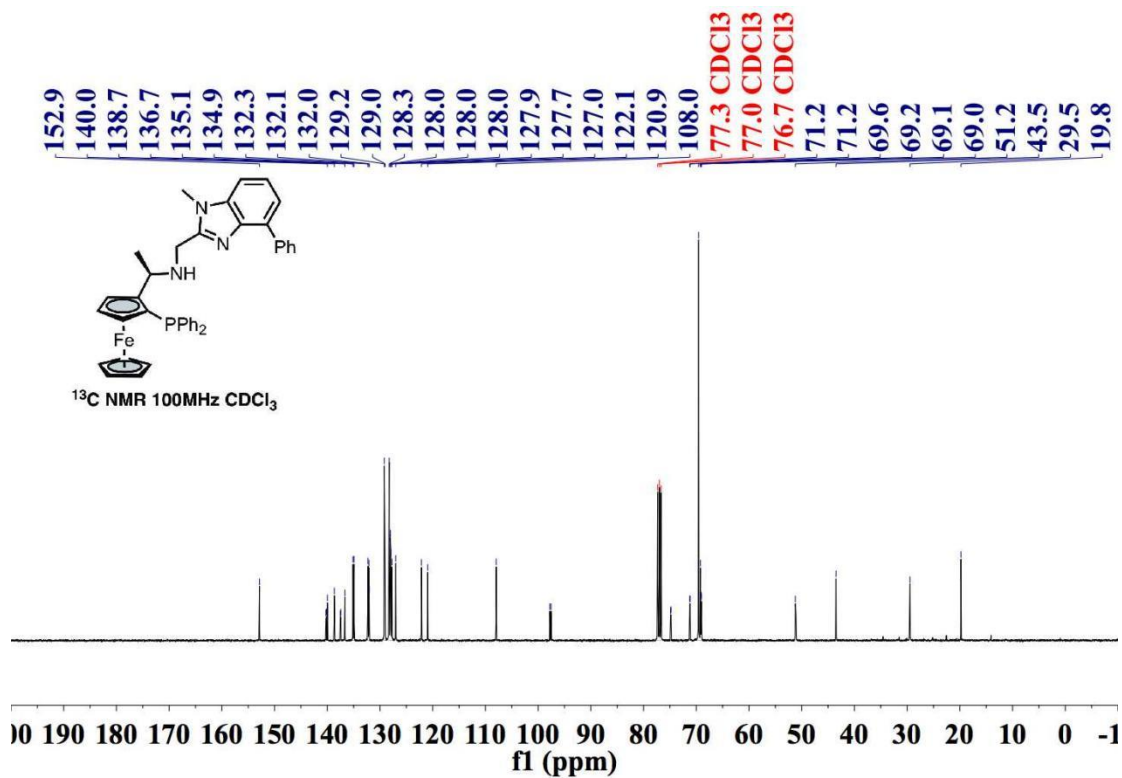

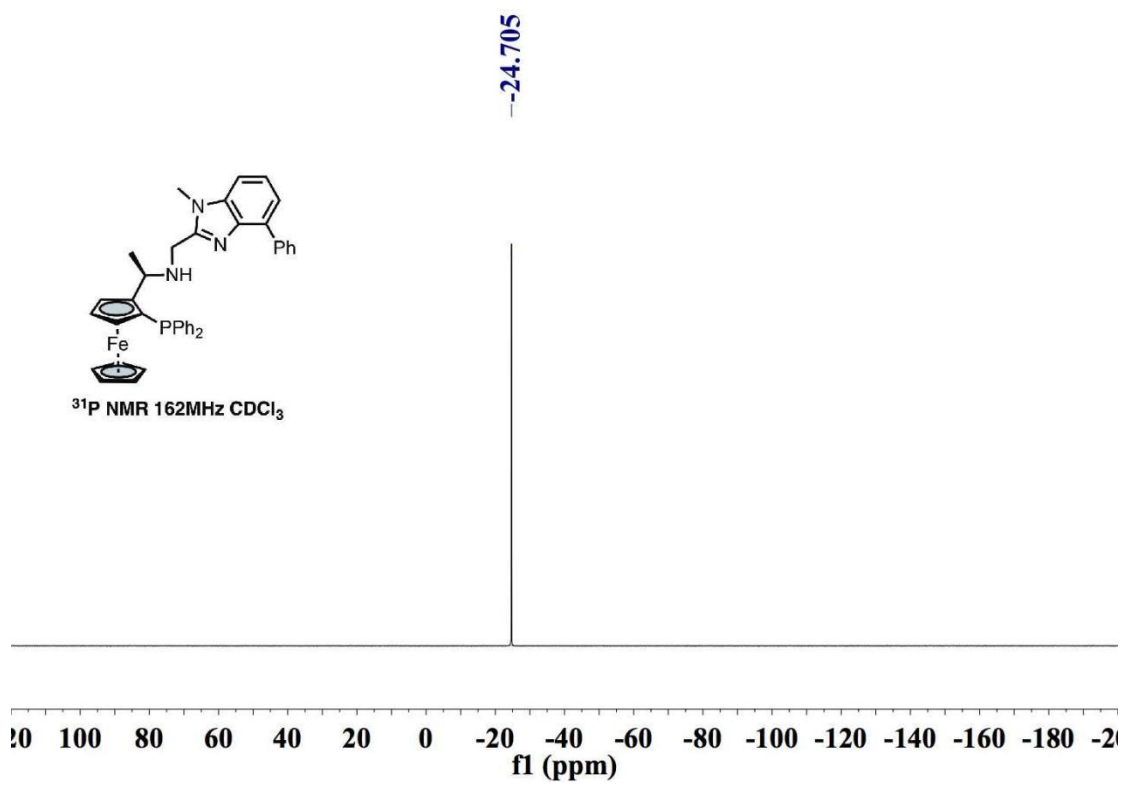



**1-(2-Bromophenyl)-2-methyl-2-(phenylsulfonyl)propan-1-one (1a):**

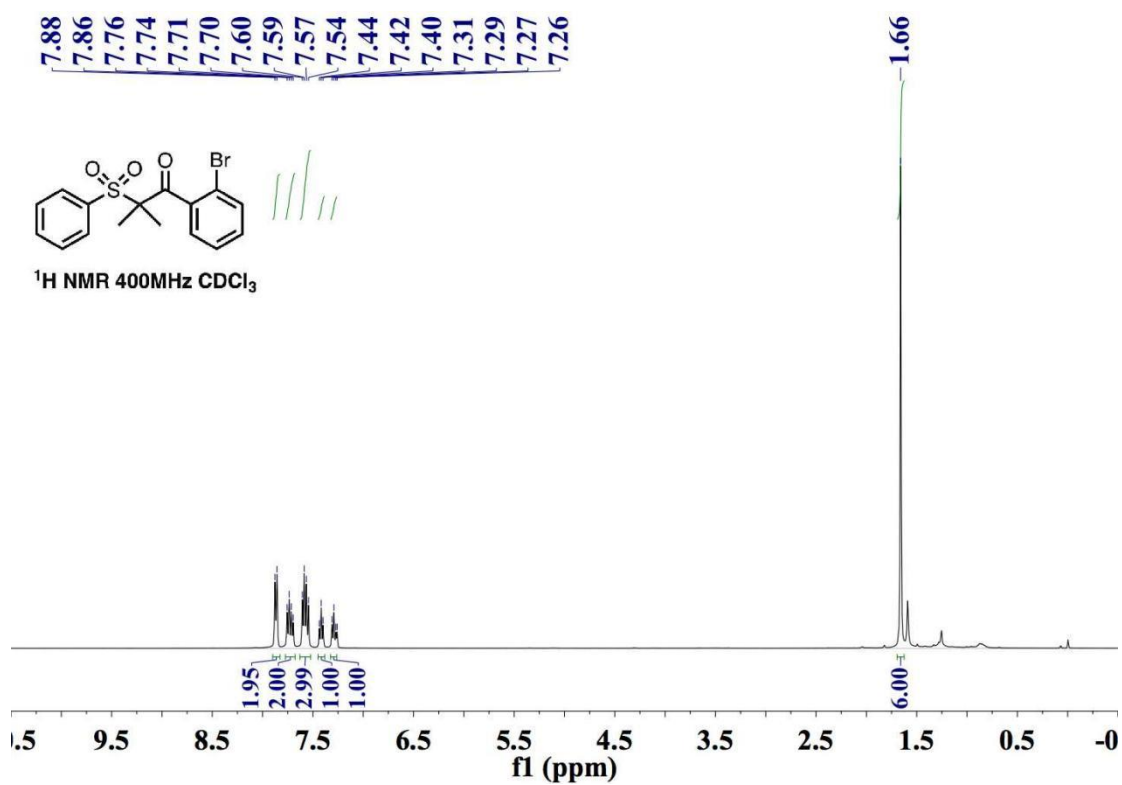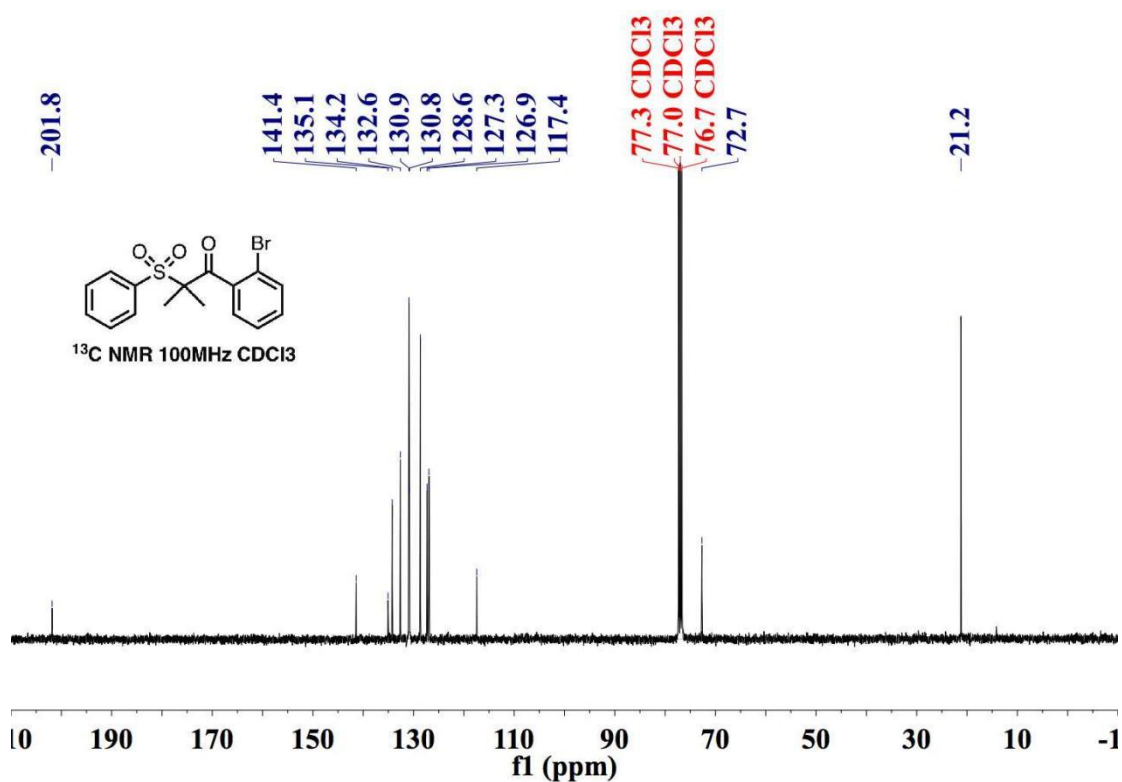

**1-(2-Bromophenyl)-2-methyl-2-tosylpropan-1-one (1b):**

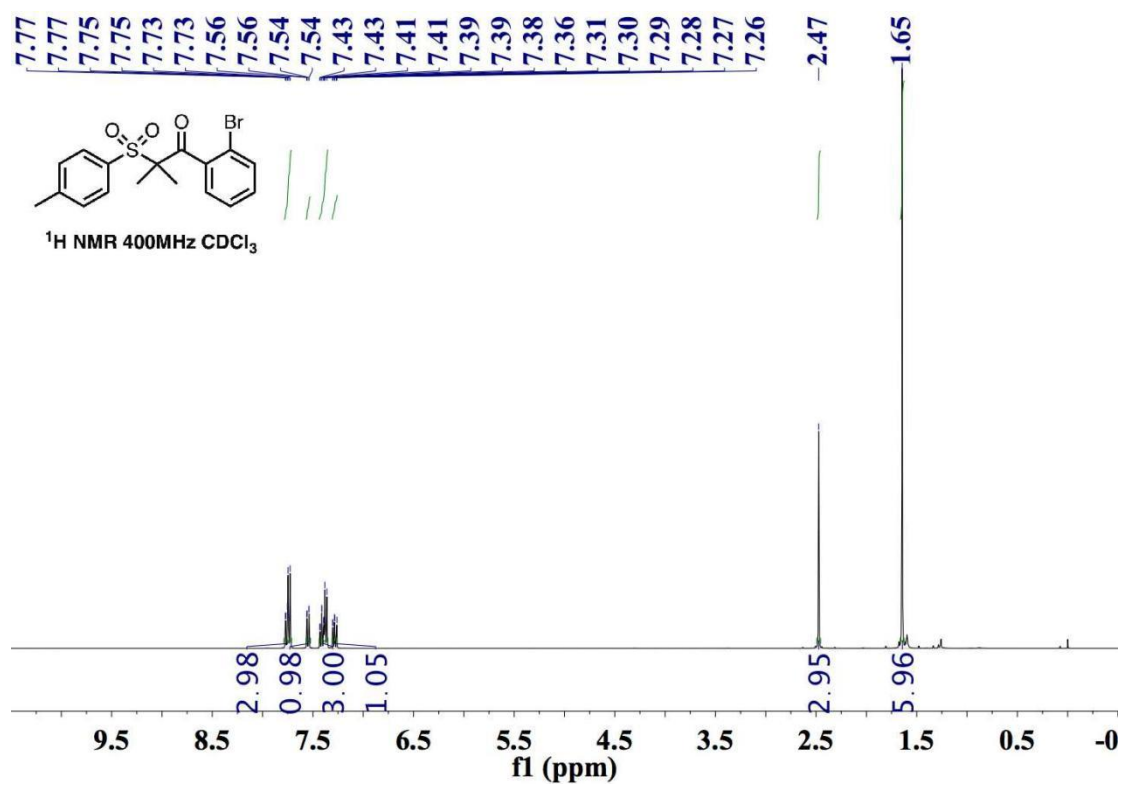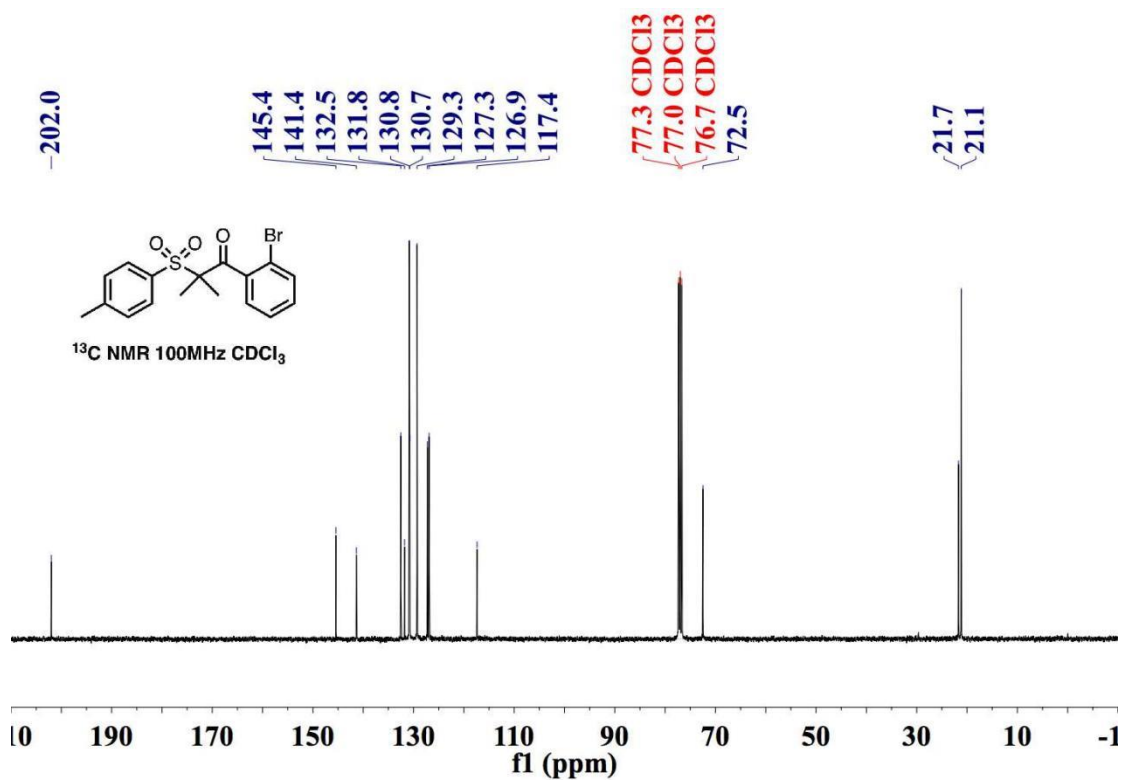

**1-(2-Bromophenyl)-2-((4-(tert-butyl)phenyl)sulfonyl)-2-methylpropan-1-one (1c):**

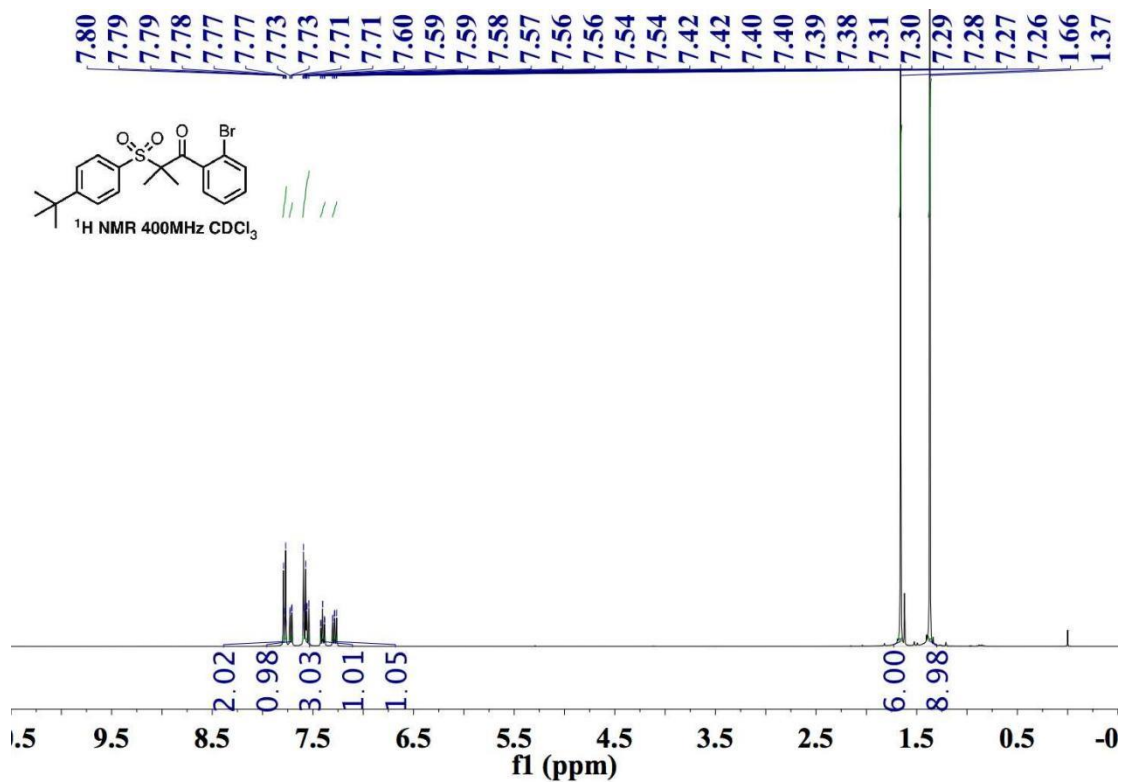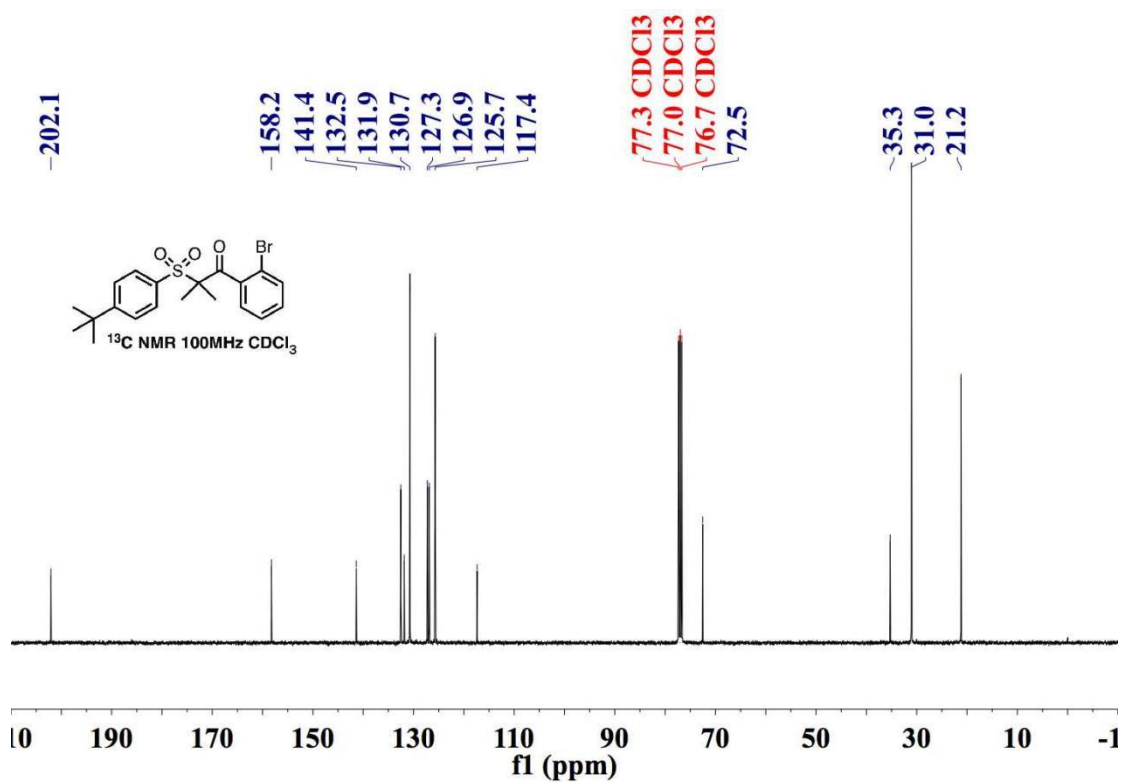

**1-(2-Bromophenyl)-2-((4-methoxyphenyl)sulfonyl)-2-methyl-propan-1-one (1d):**

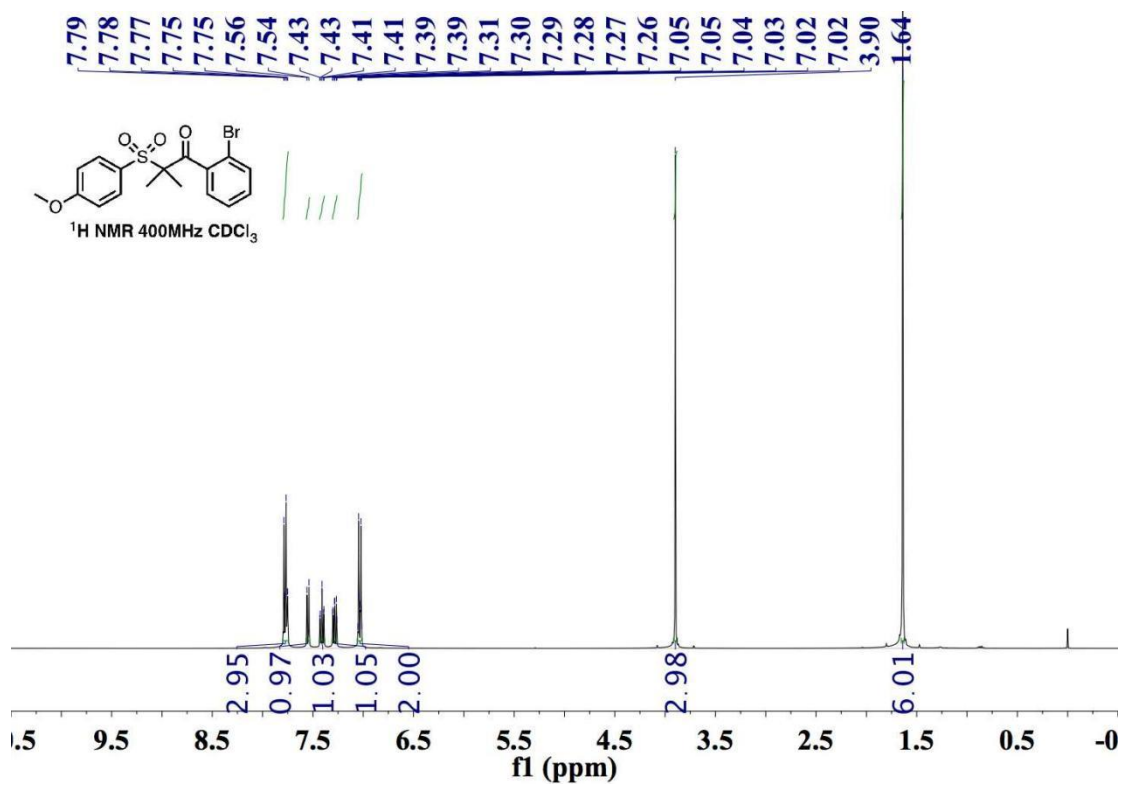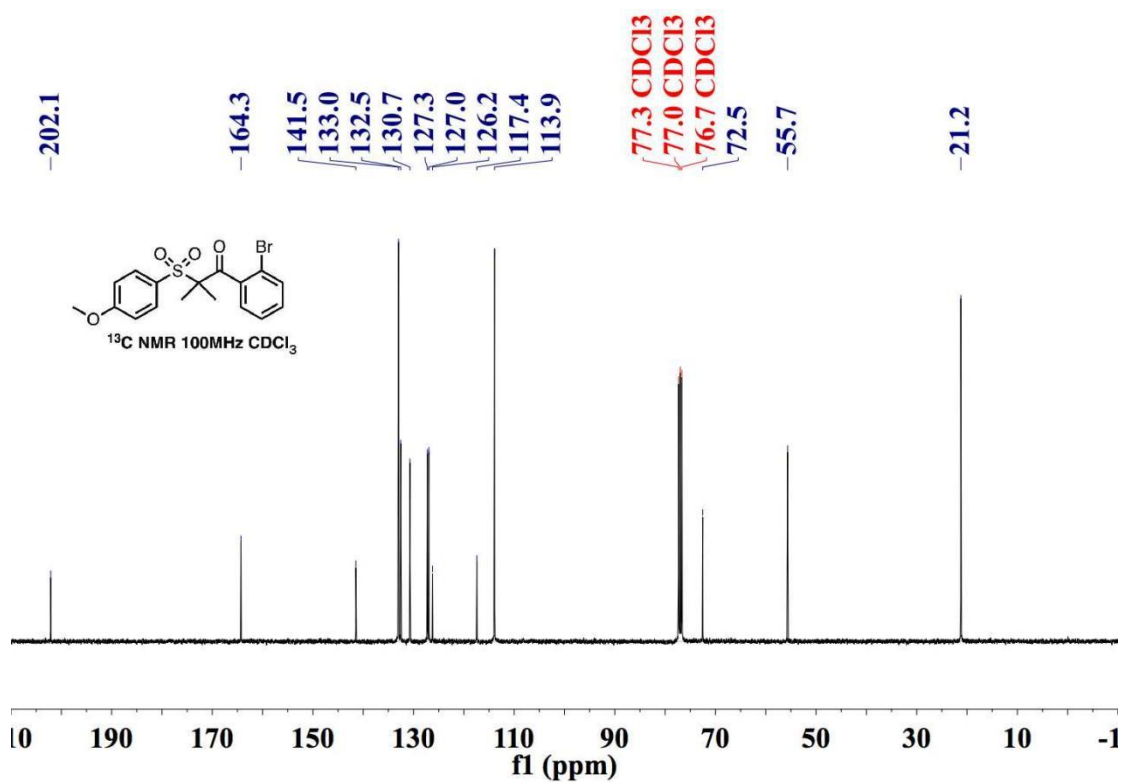

1-(2-Bromophenyl)-2-((4-fluorophenyl)sulfonyl)-2-methylpropan-1-one (1e):

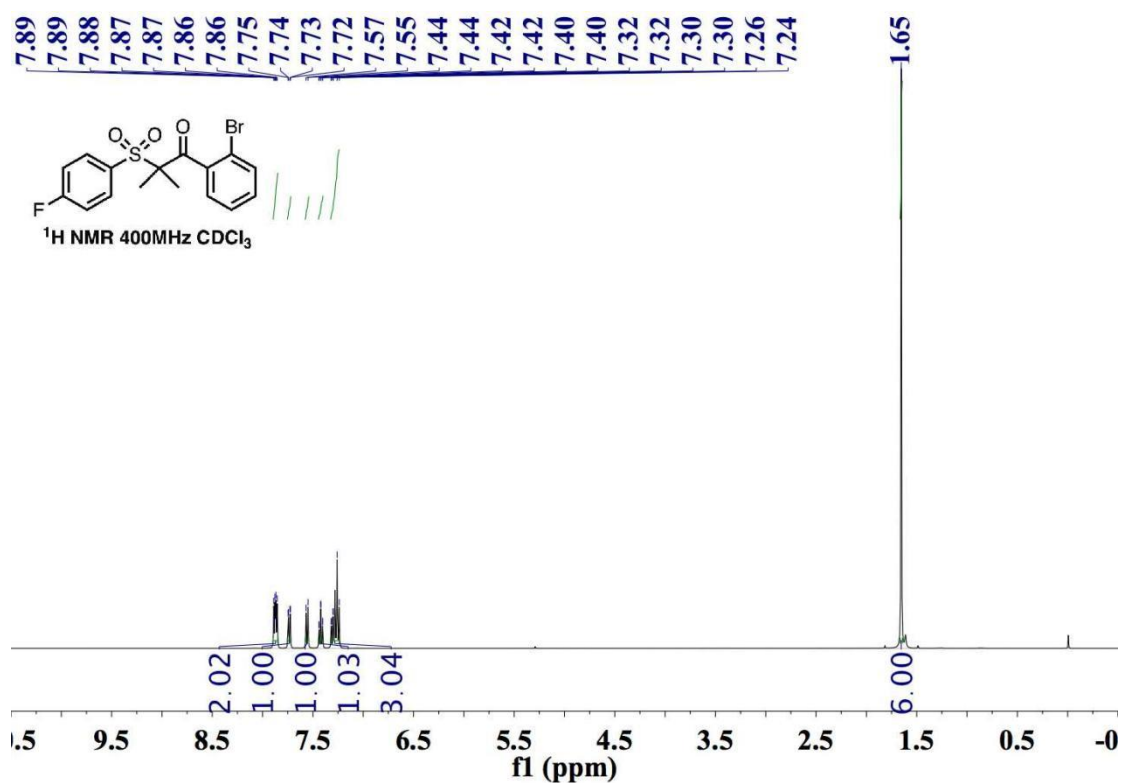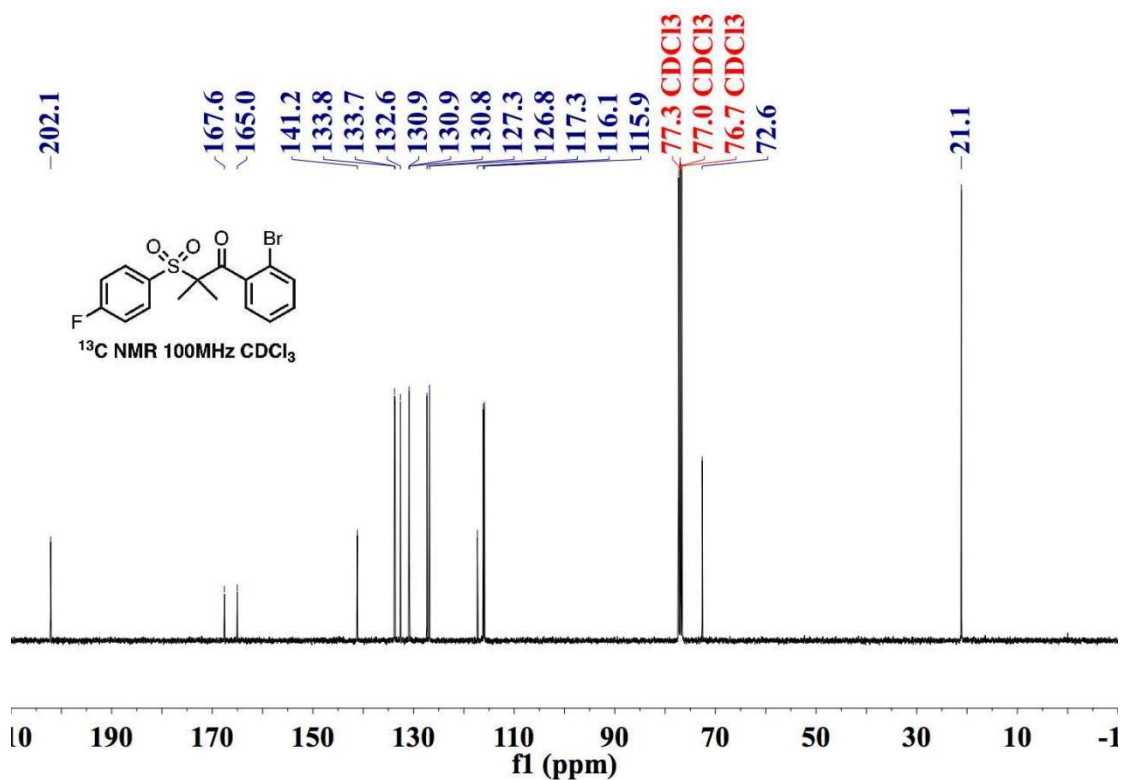

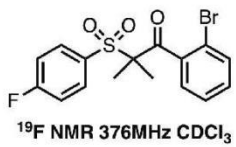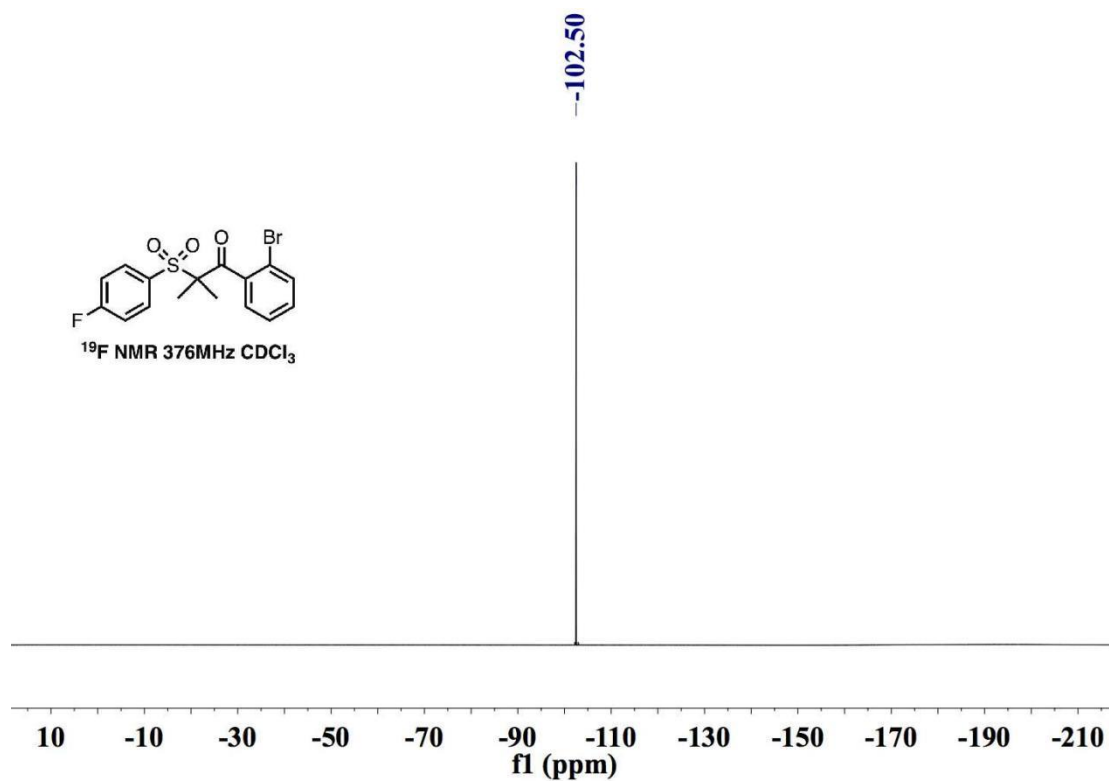

**1-(2-Bromophenyl)-2-methyl-2-((4-(trifluoromethyl)phenyl)sulfonyl)propan-1-one (1f):**

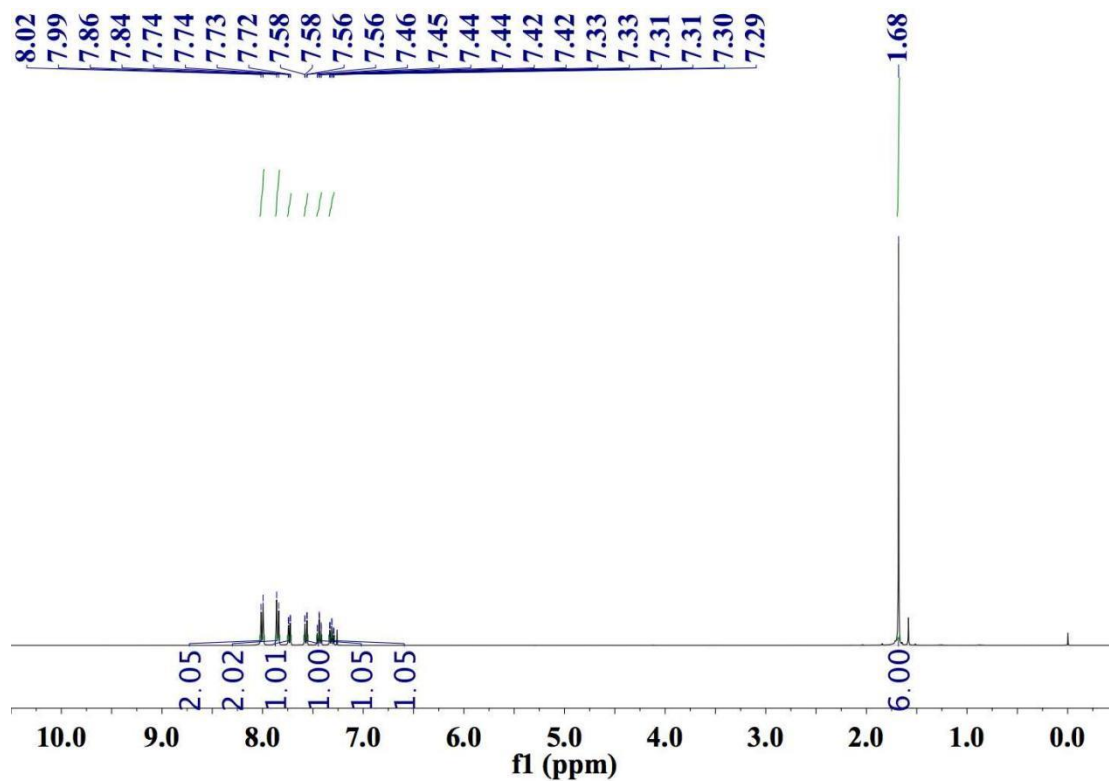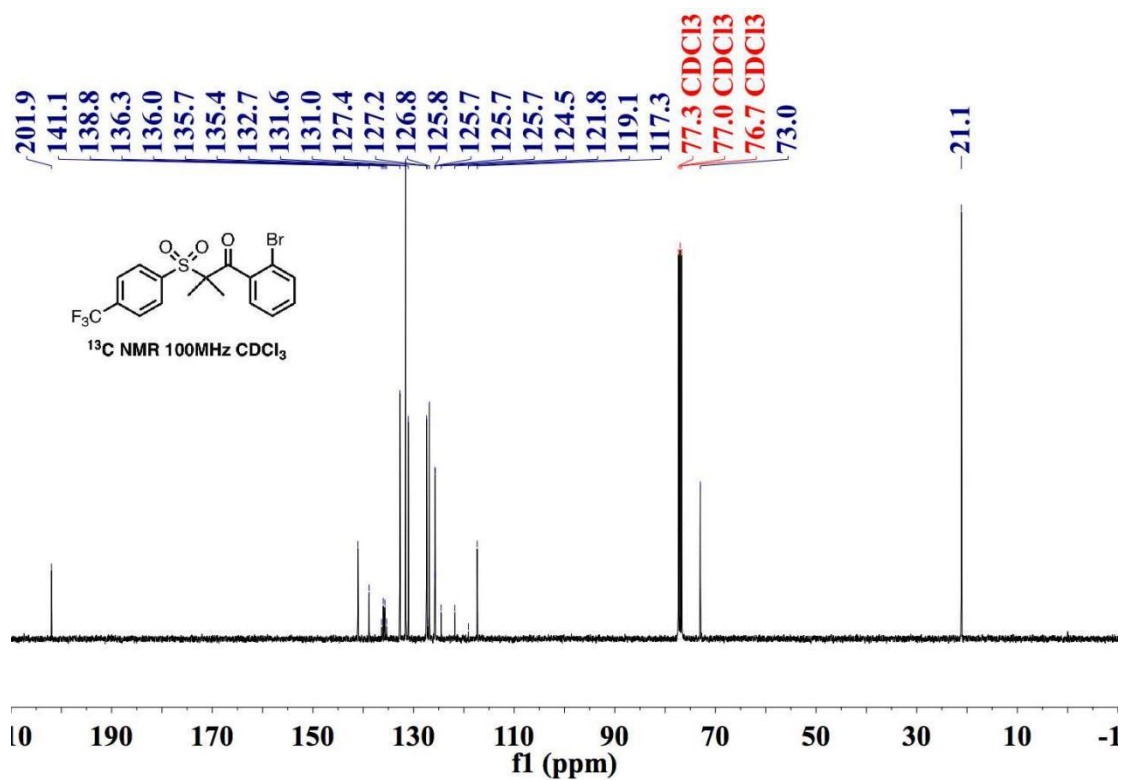

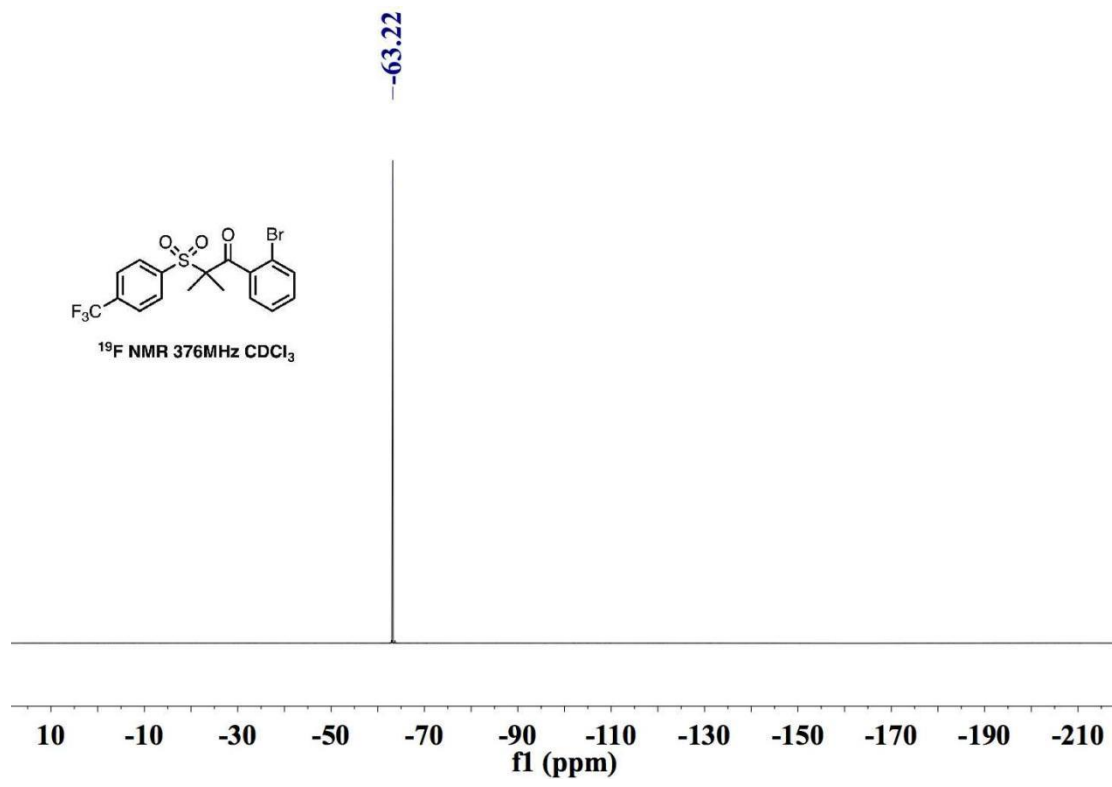



**1-(2-Bromophenyl)-2-methyl-2-((4-nitrophenyl)sulfonyl)propan-1-one (1g):**

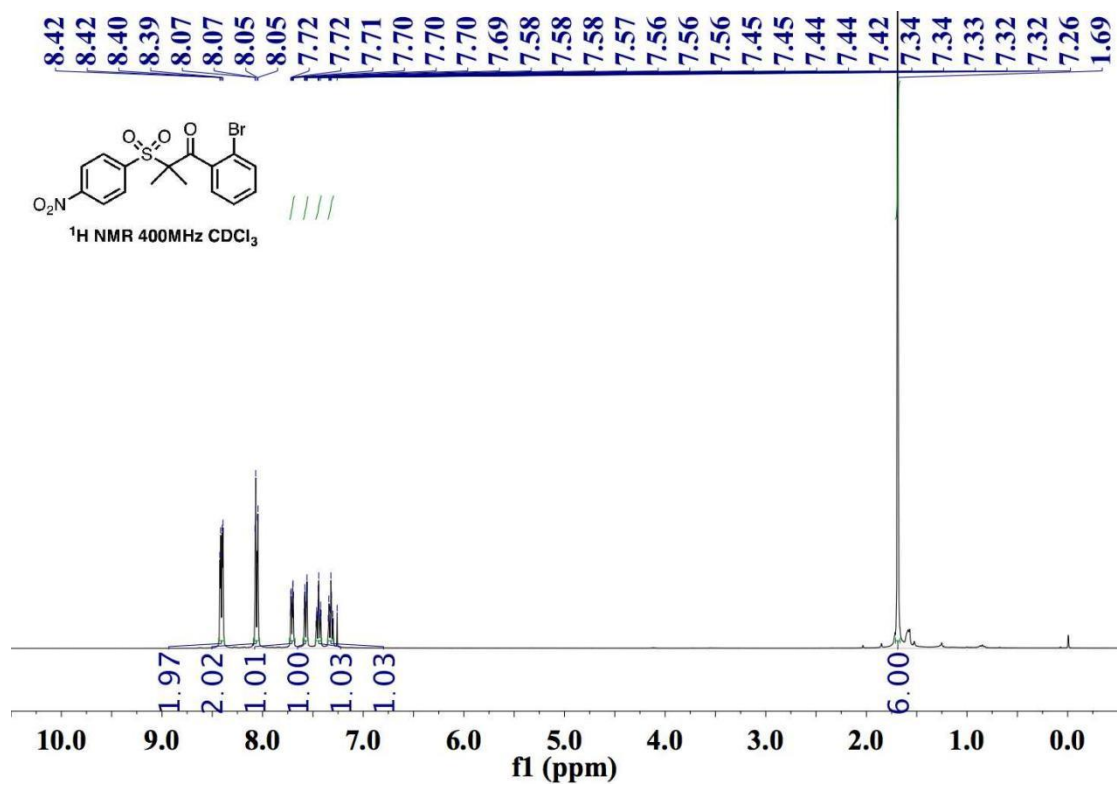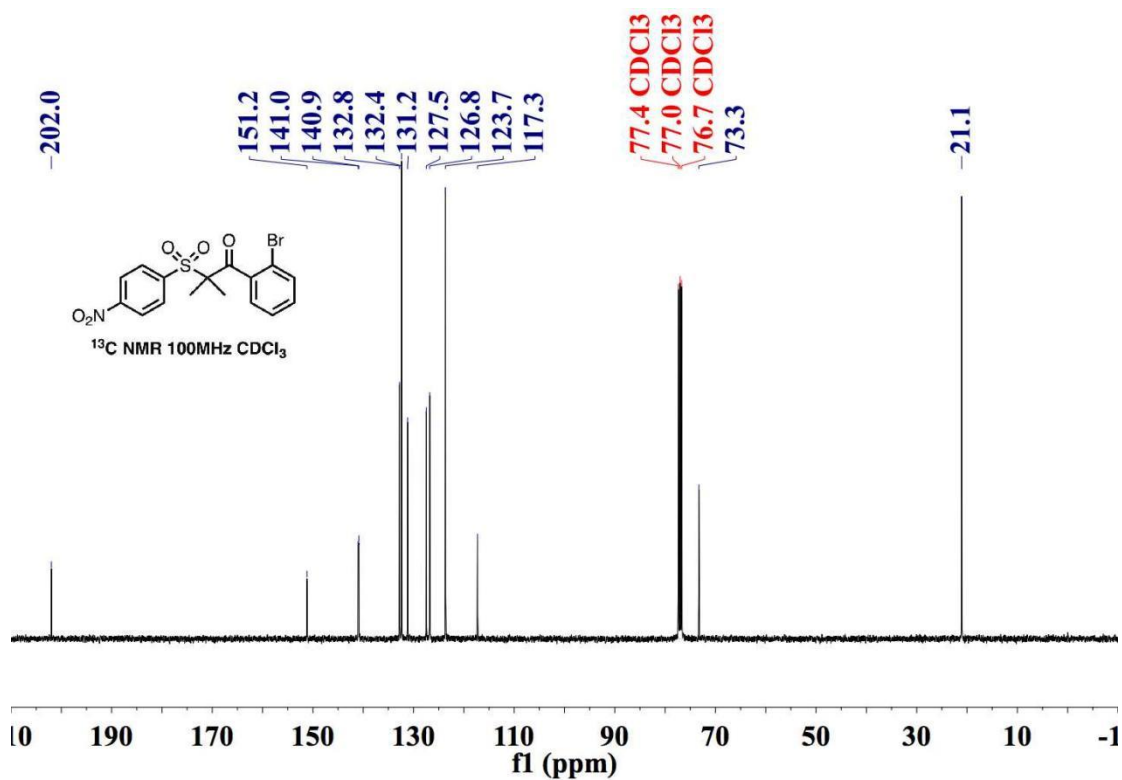

1-(2-Bromophenyl)-2-((2-bromophenyl)sulfonyl)-2-methylpropan-1-one (1h):

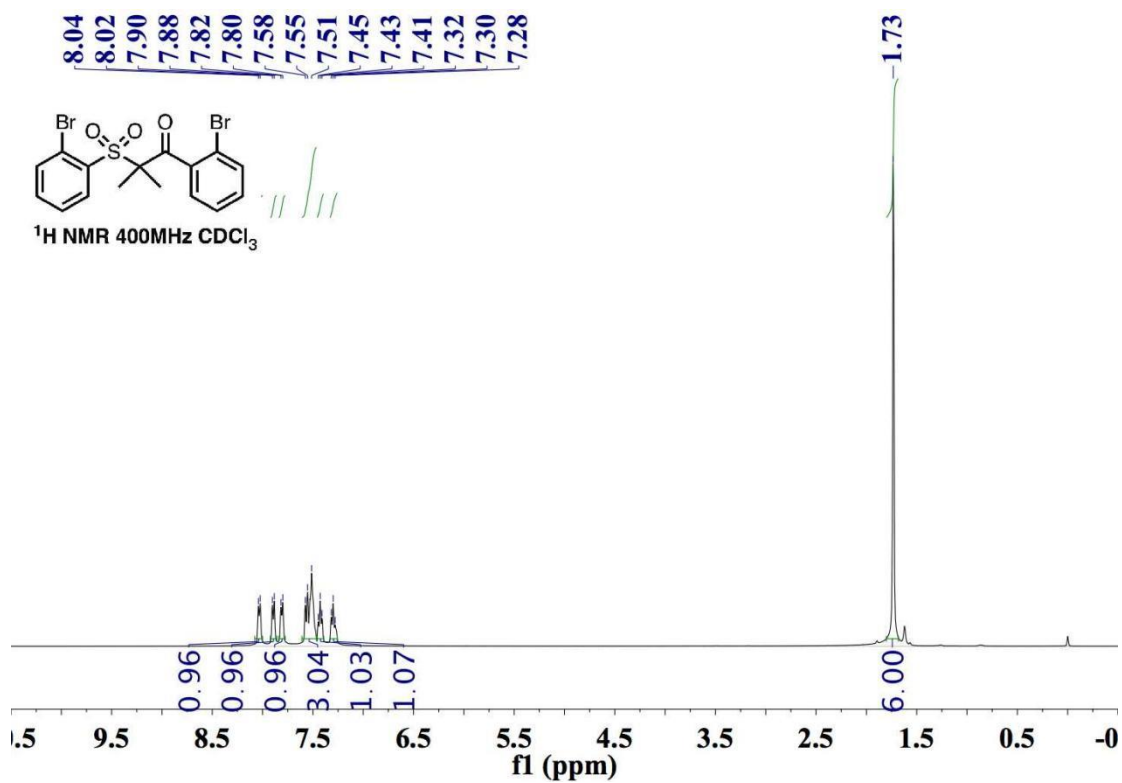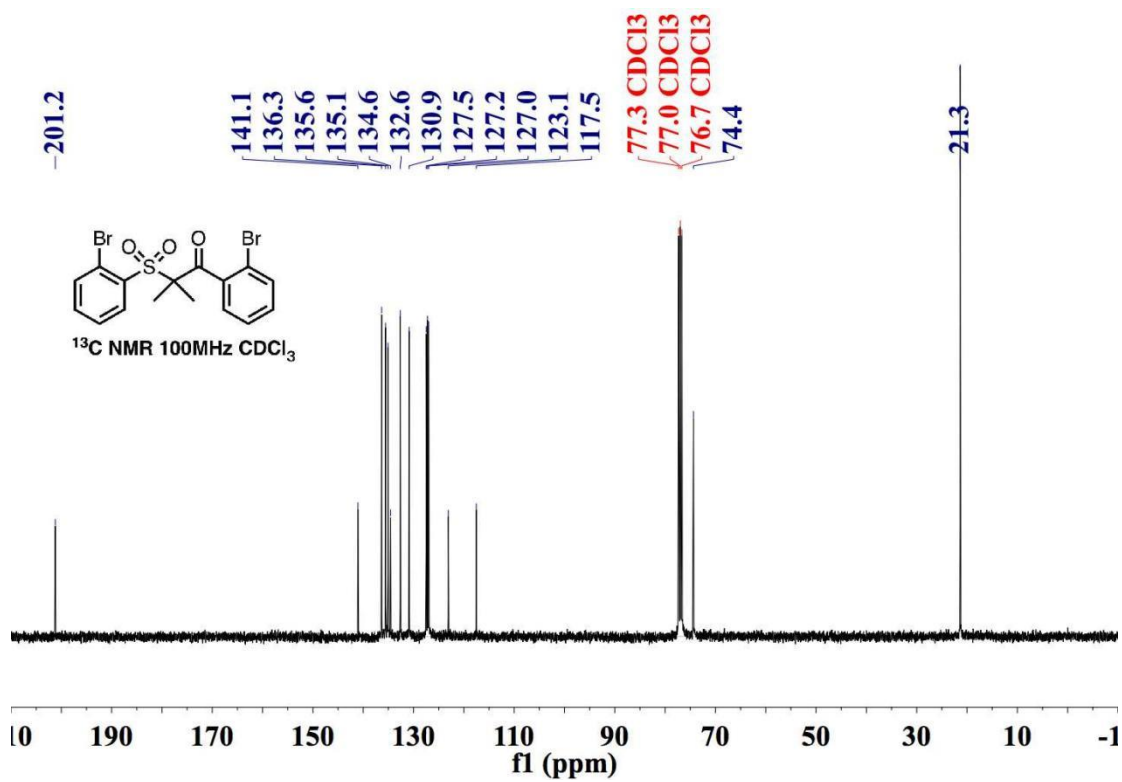



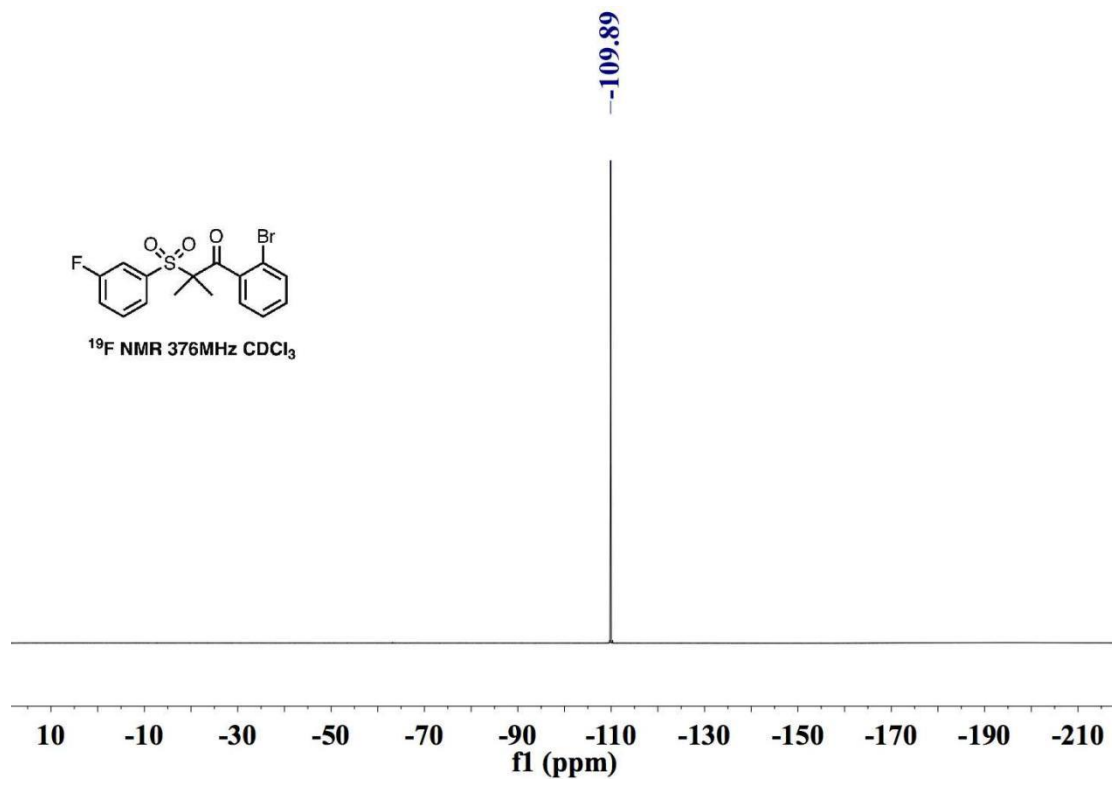

**1-(2-Bromophenyl)-2-methyl-2-(naphthalen-2-ylsulfonyl)propan-1-one (1j):**

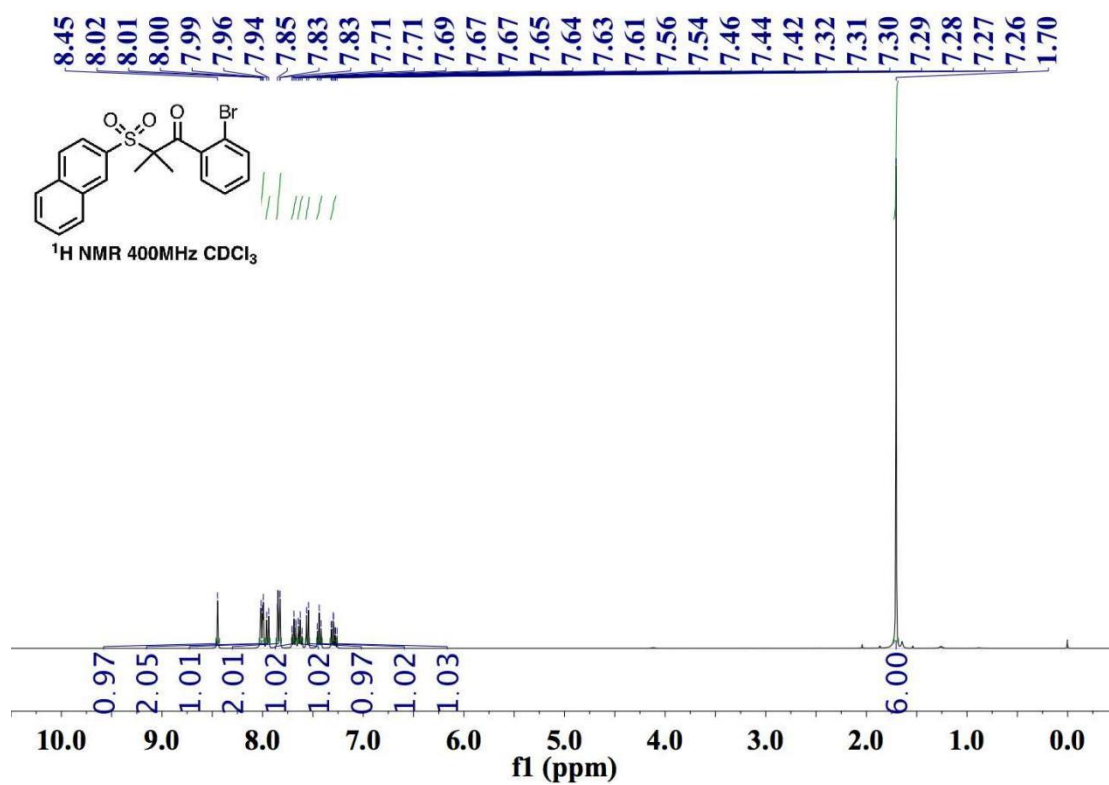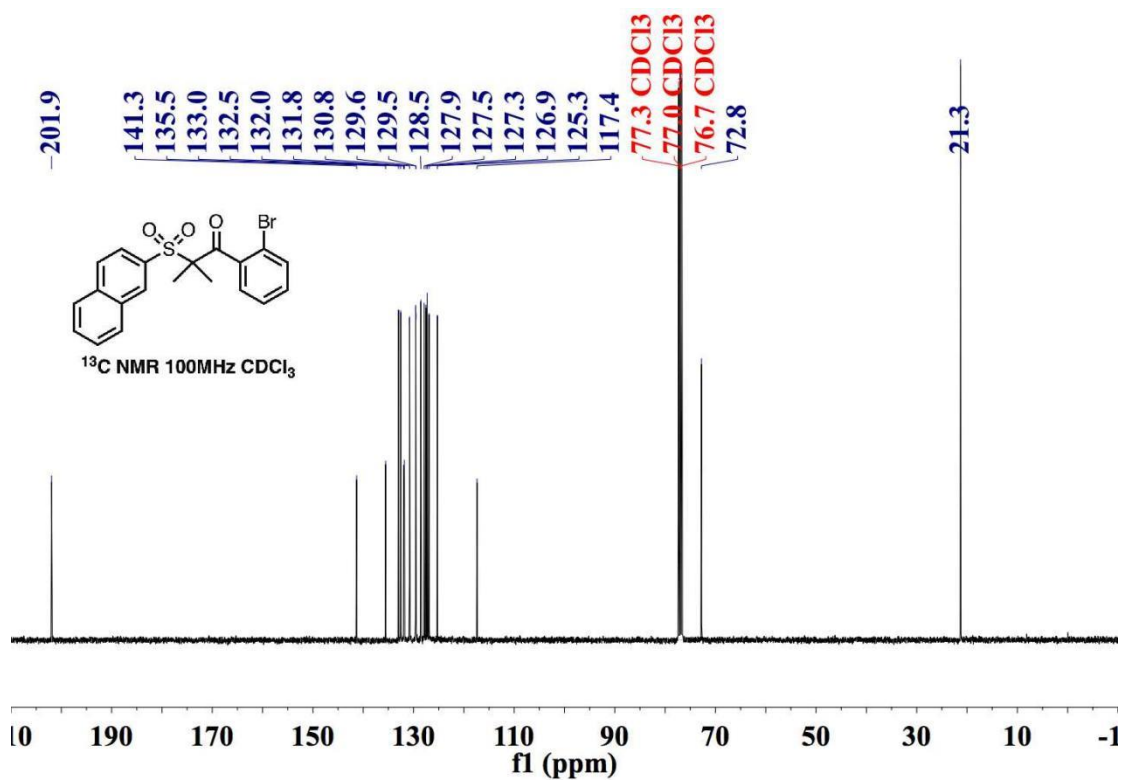

**1-(2-Bromophenyl)-2-methyl-2-(pyridin-3-ylsulfonyl)propan-1-one (1k):**

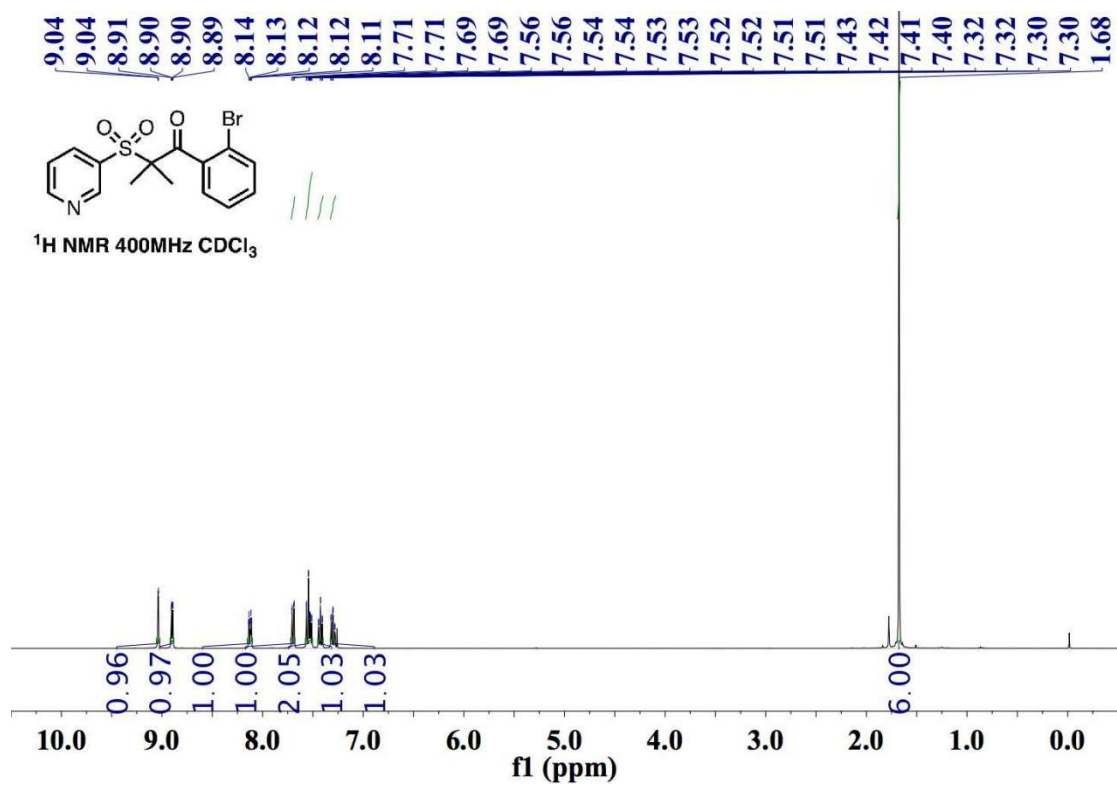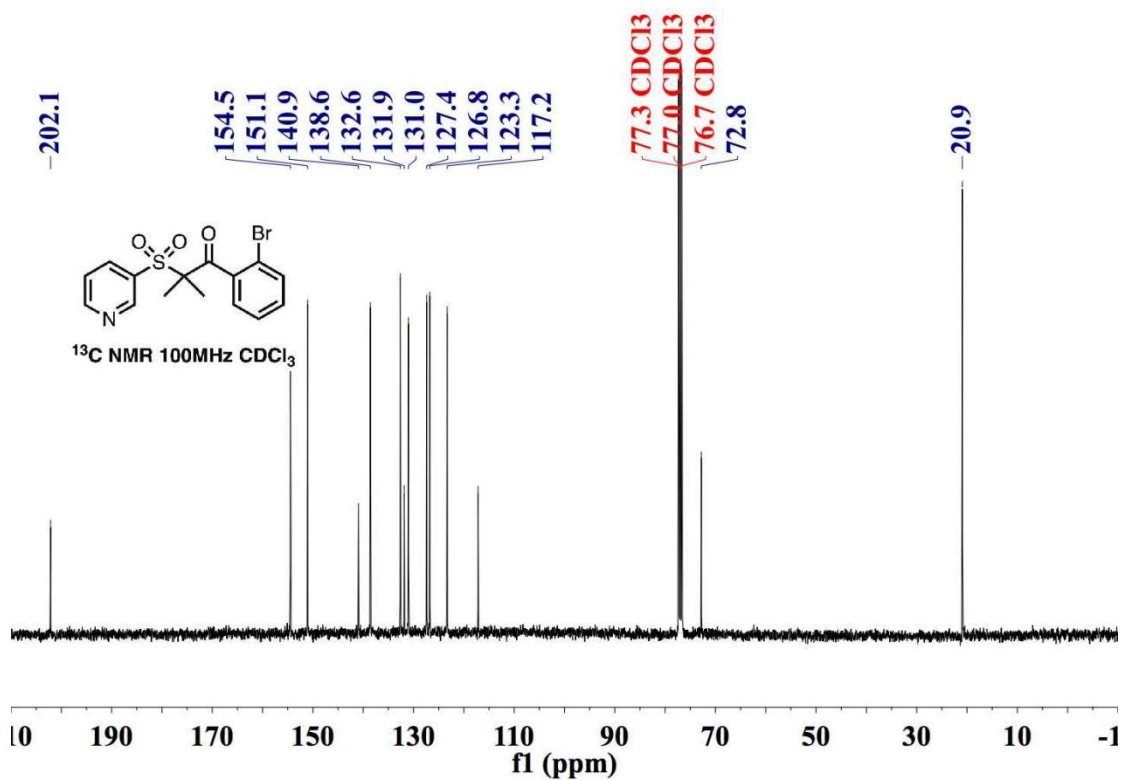

**1-(2-Bromophenyl)-2-methyl-2-(thiophen-2-ylsulfonyl)propan-1-one (11):**

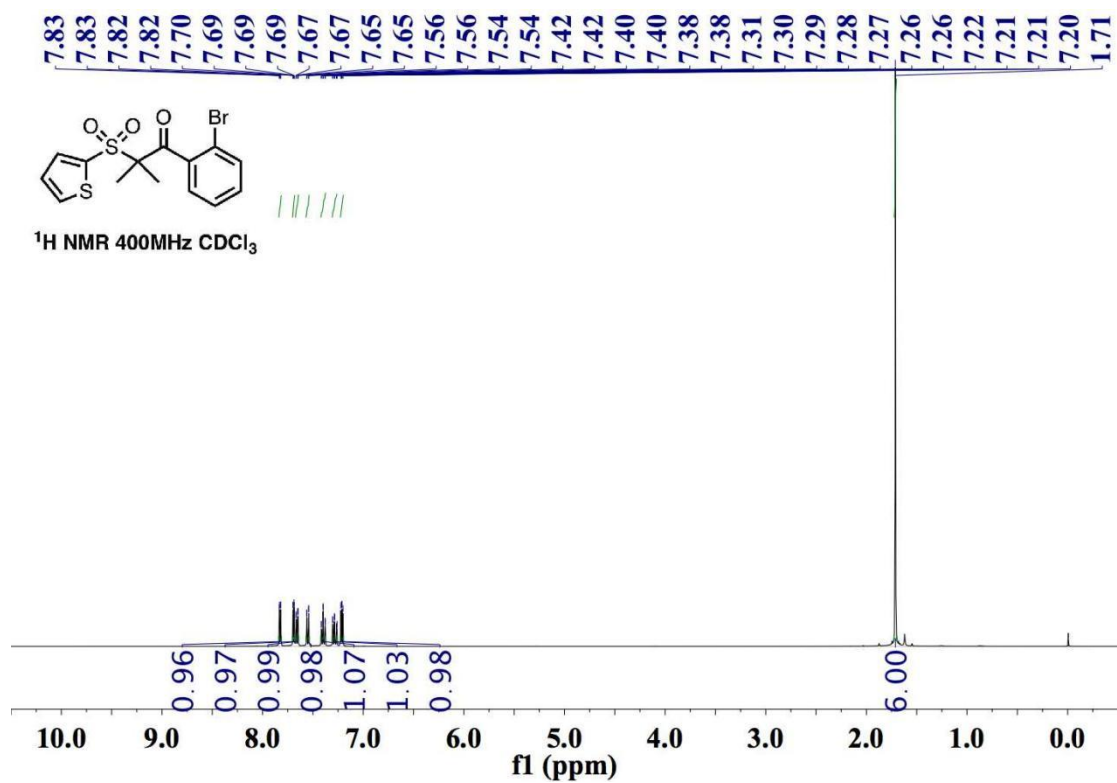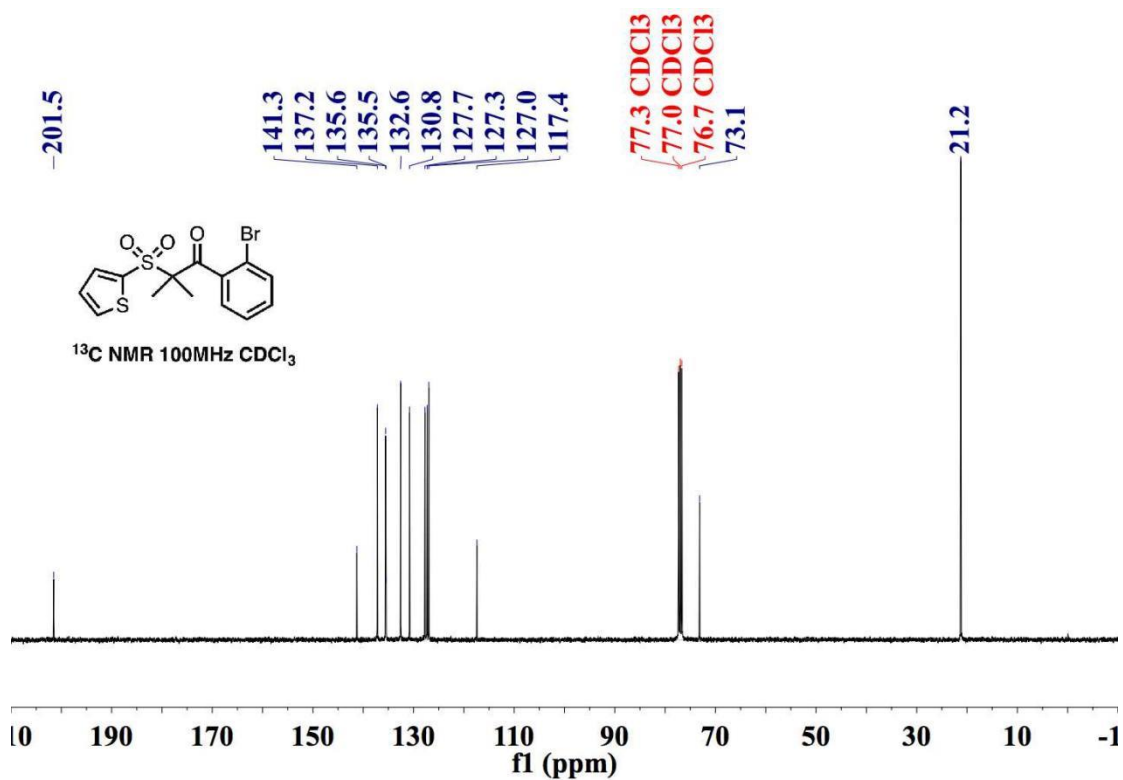

1-(2-Bromophenyl)-2-methyl-2-(methylsulfonyl)propan-1-one (1m):

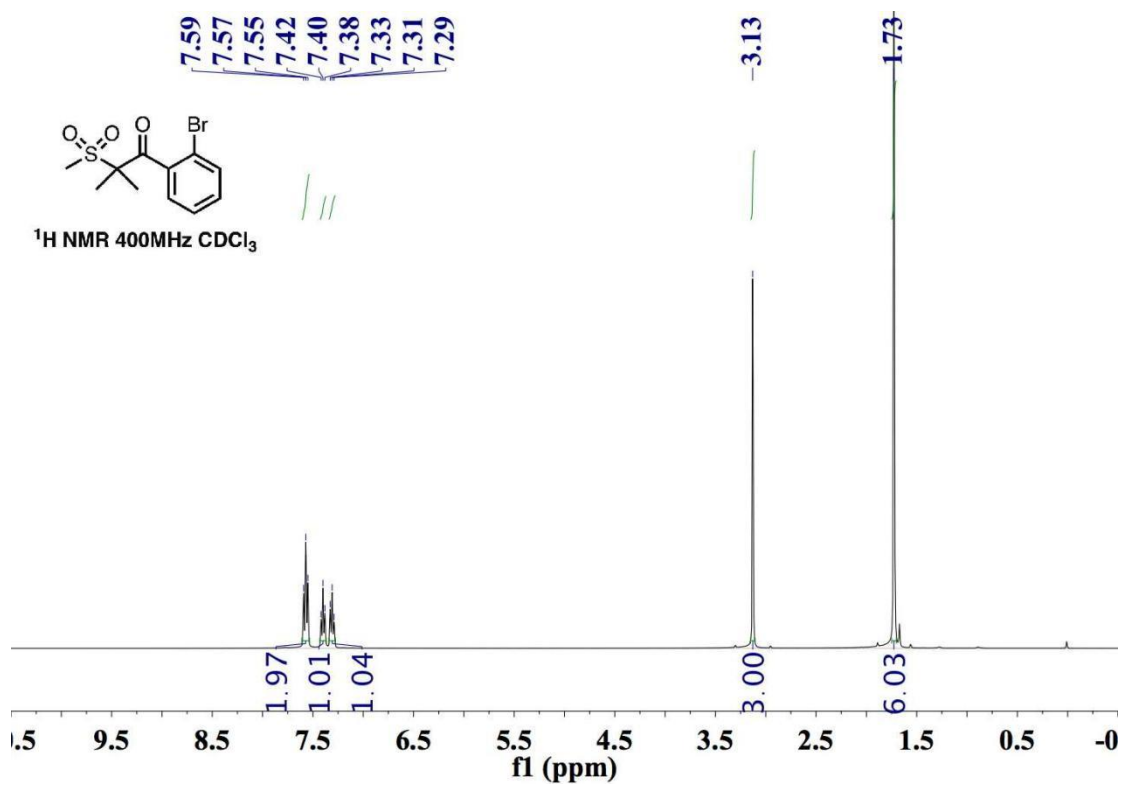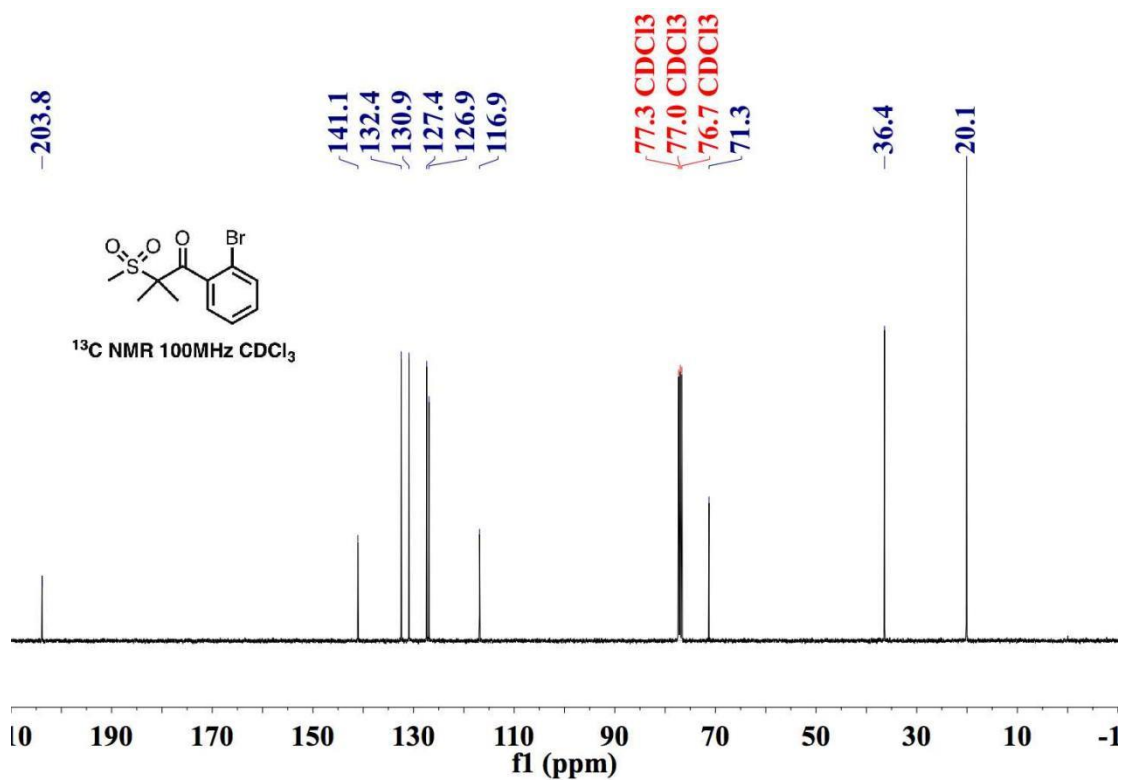



**(2-Bromophenyl)(1-(phenylsulfonyl)cyclopentyl)methanone (1n):**

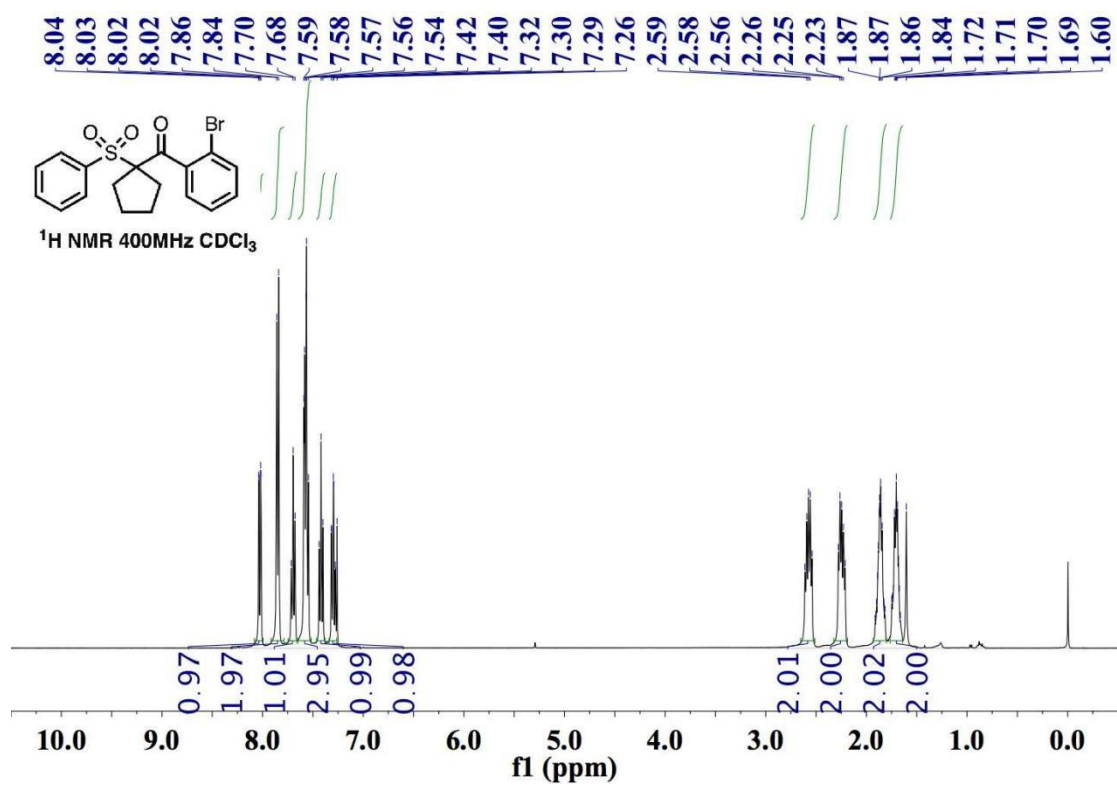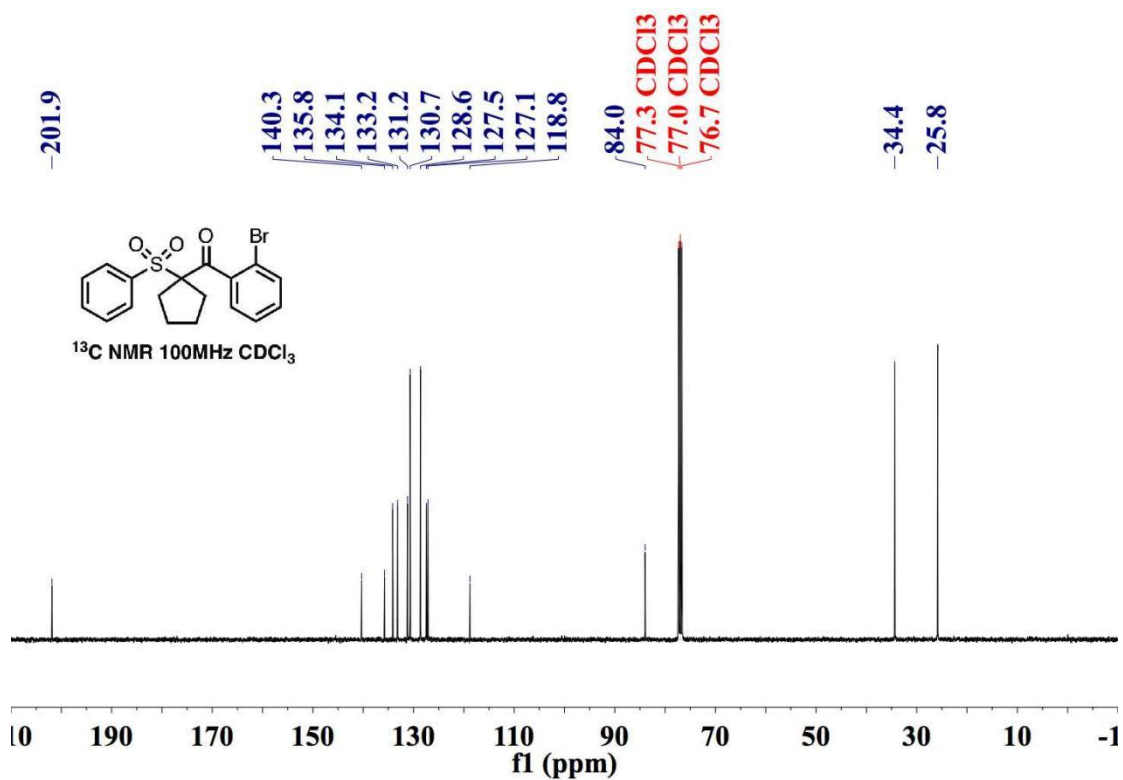

**1-(2-Bromophenyl)-2-(phenylsulfonyl)ethan-1-one (1o):**

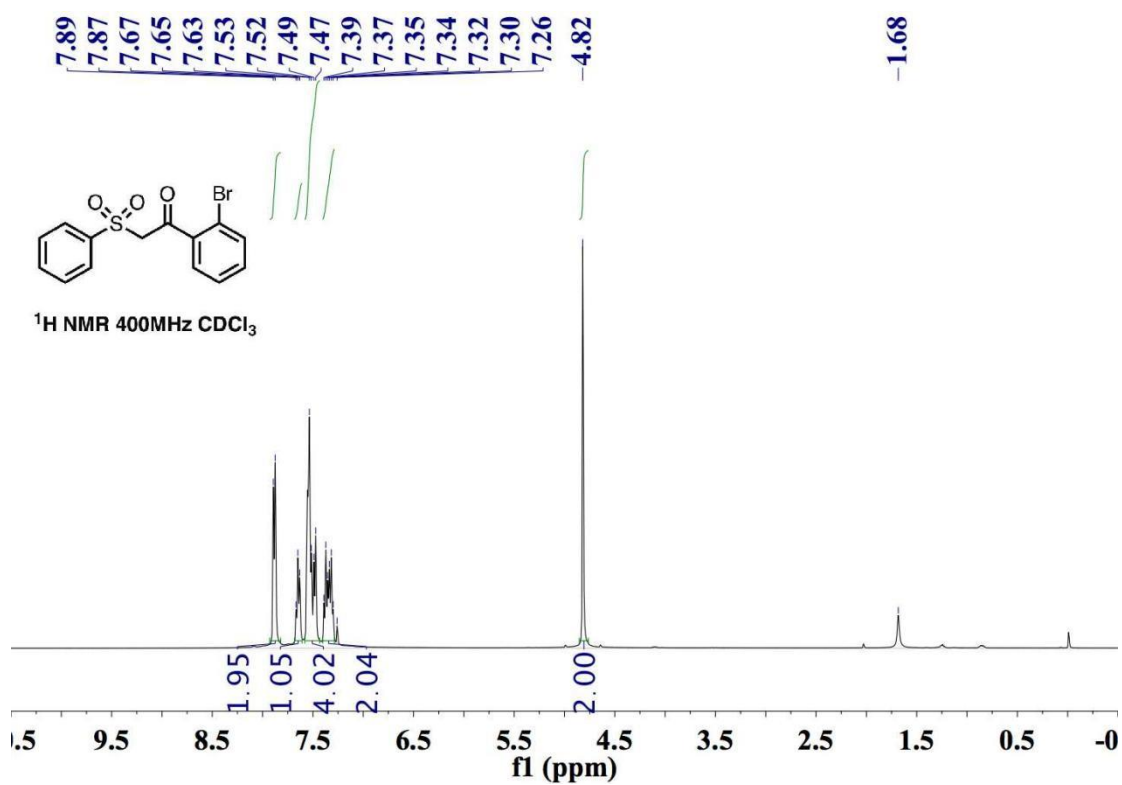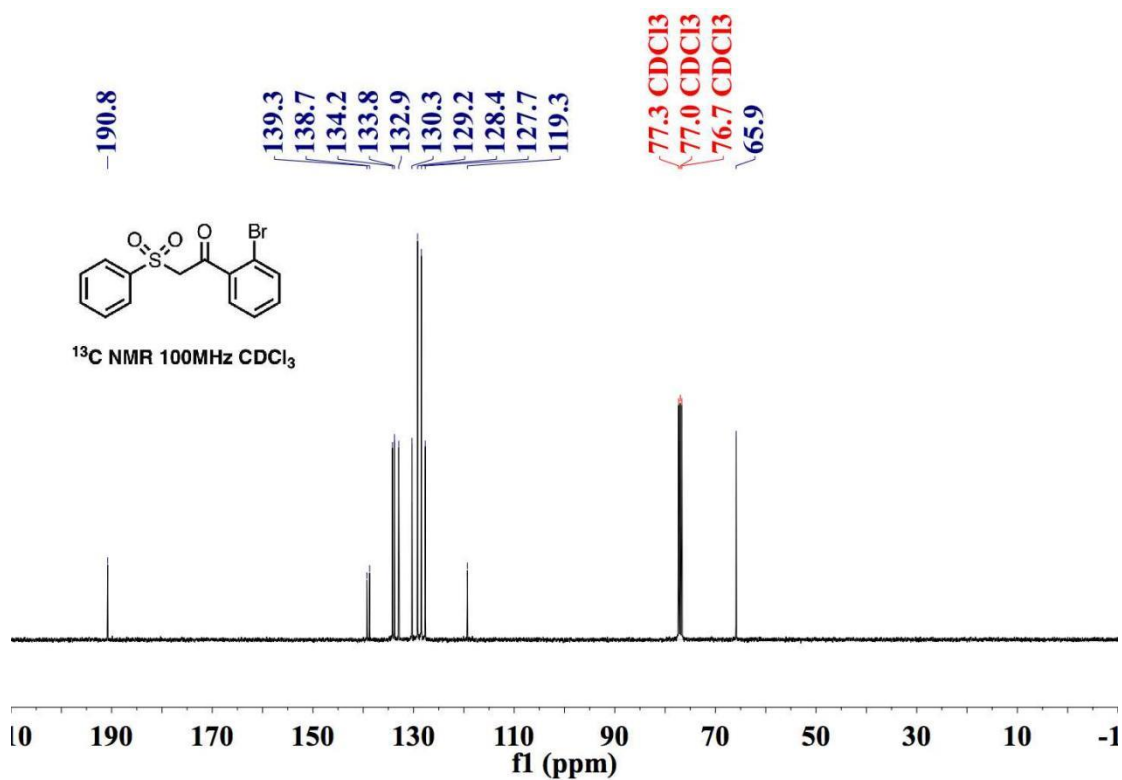

**2-Methyl-1-phenyl-2-(phenylsulfonyl)propan-1-one (1p):**

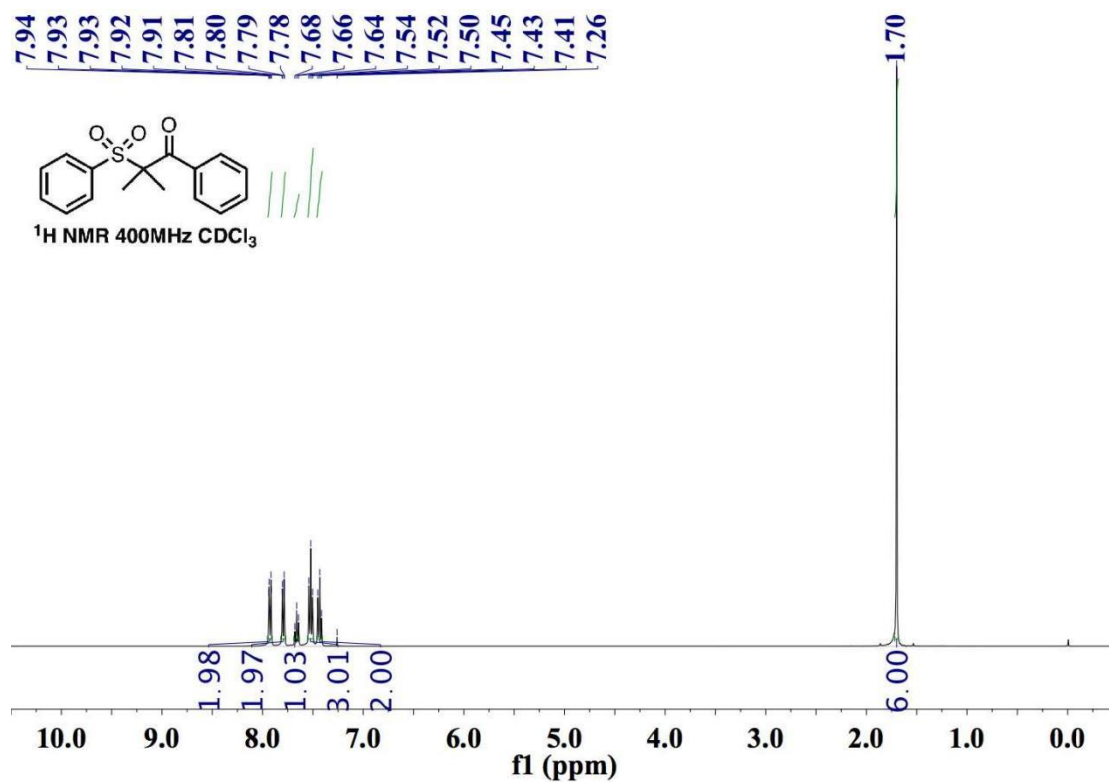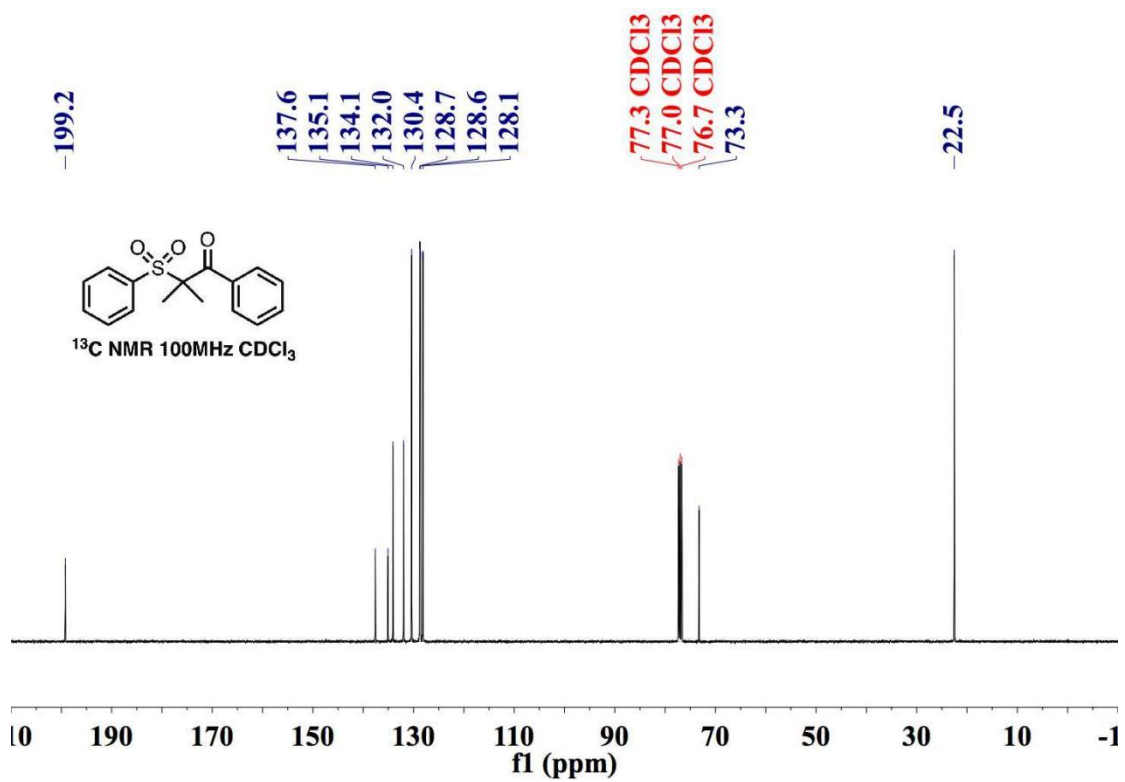

**2-Methyl-2-(phenylsulfonyl)-1-(o-tolyl)propan-1-one (1q):**

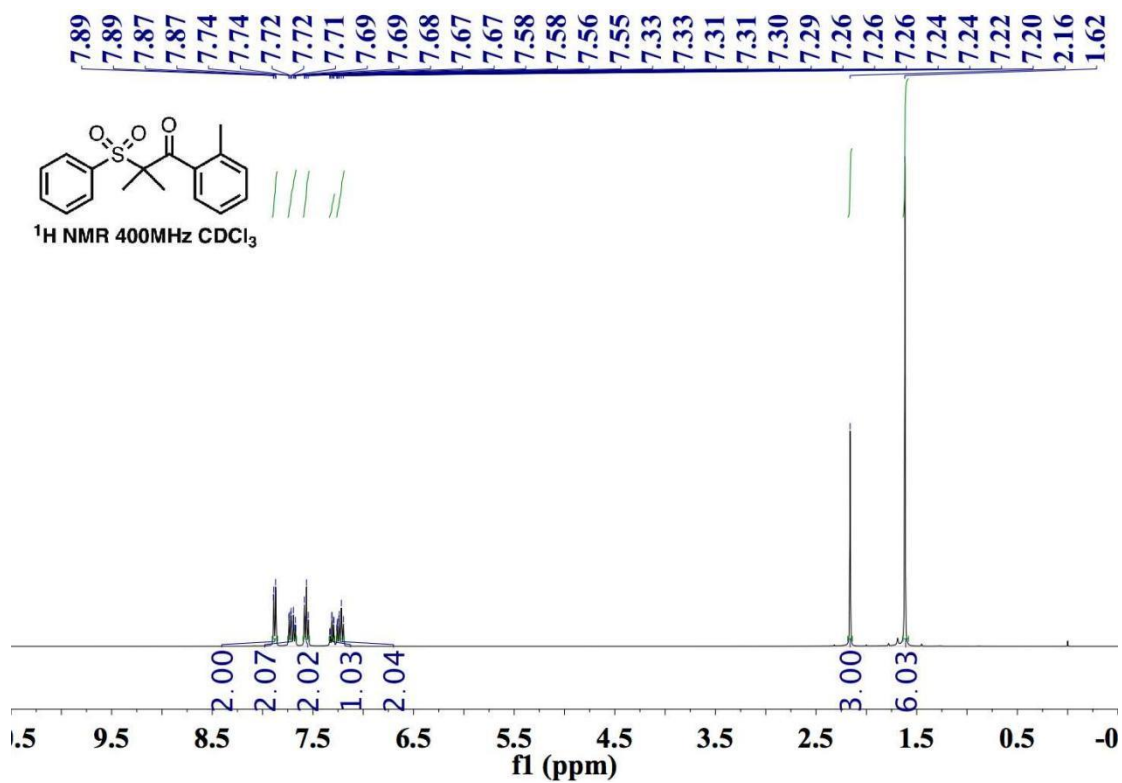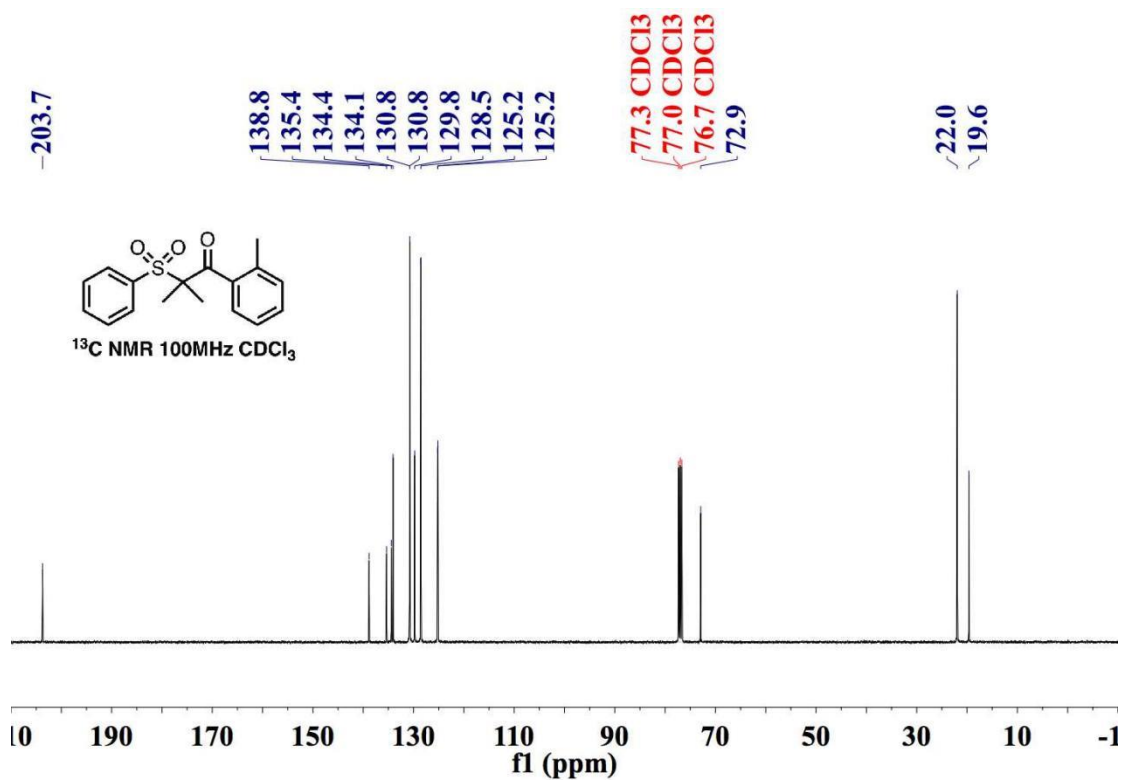

**1-(2-Methoxyphenyl)-2-methyl-2-(phenylsulfonyl)propan-1-one (1r):**

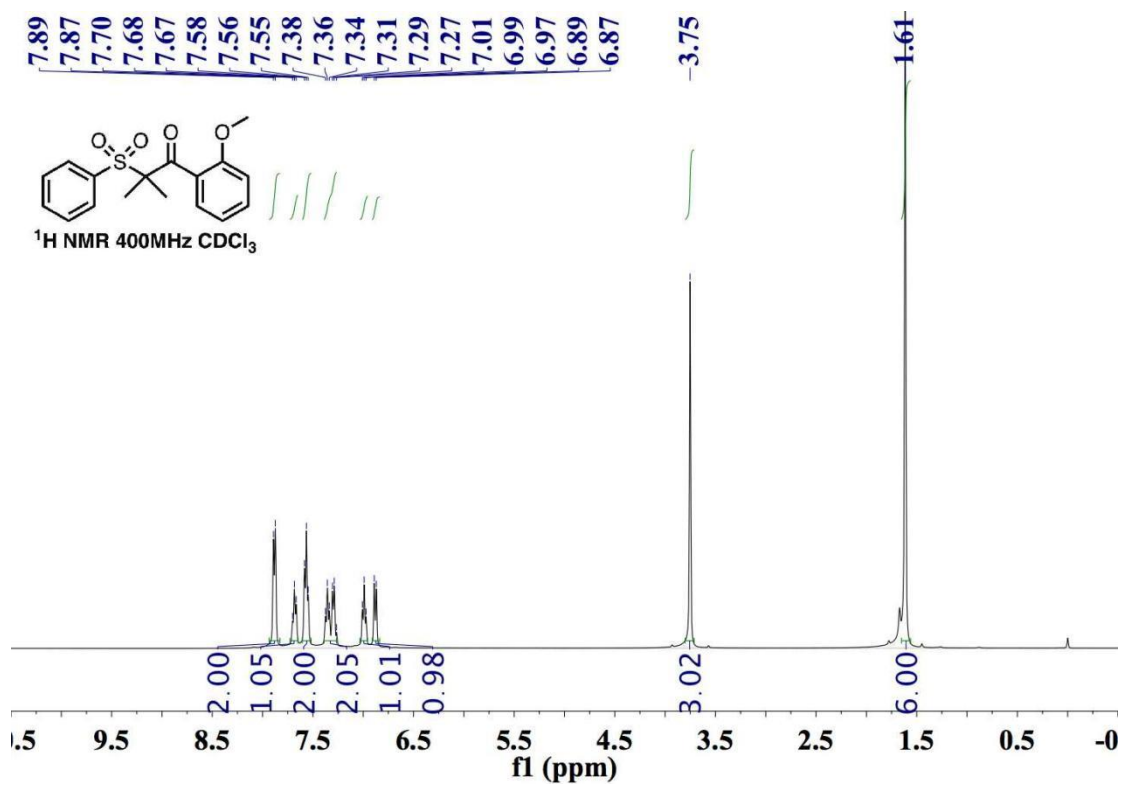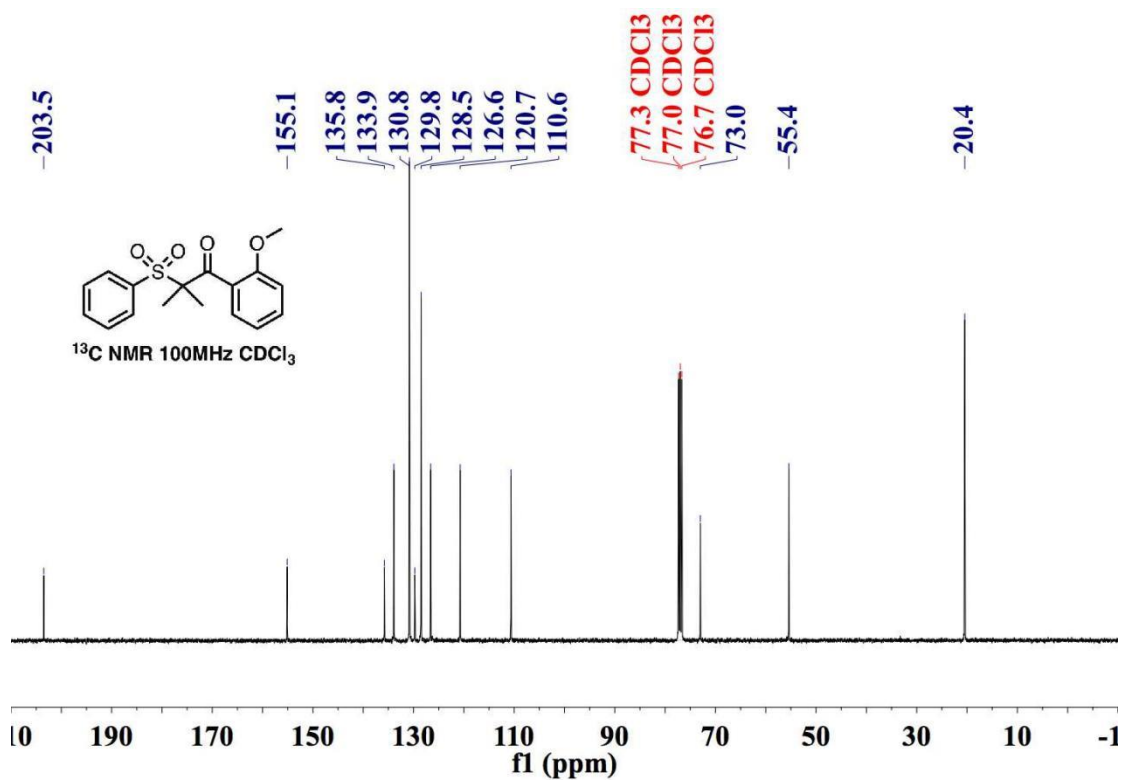

2-Methyl-2-(phenylsulfonyl)-1-(2-(trifluoromethyl)phenyl)propan-1-one (1s):

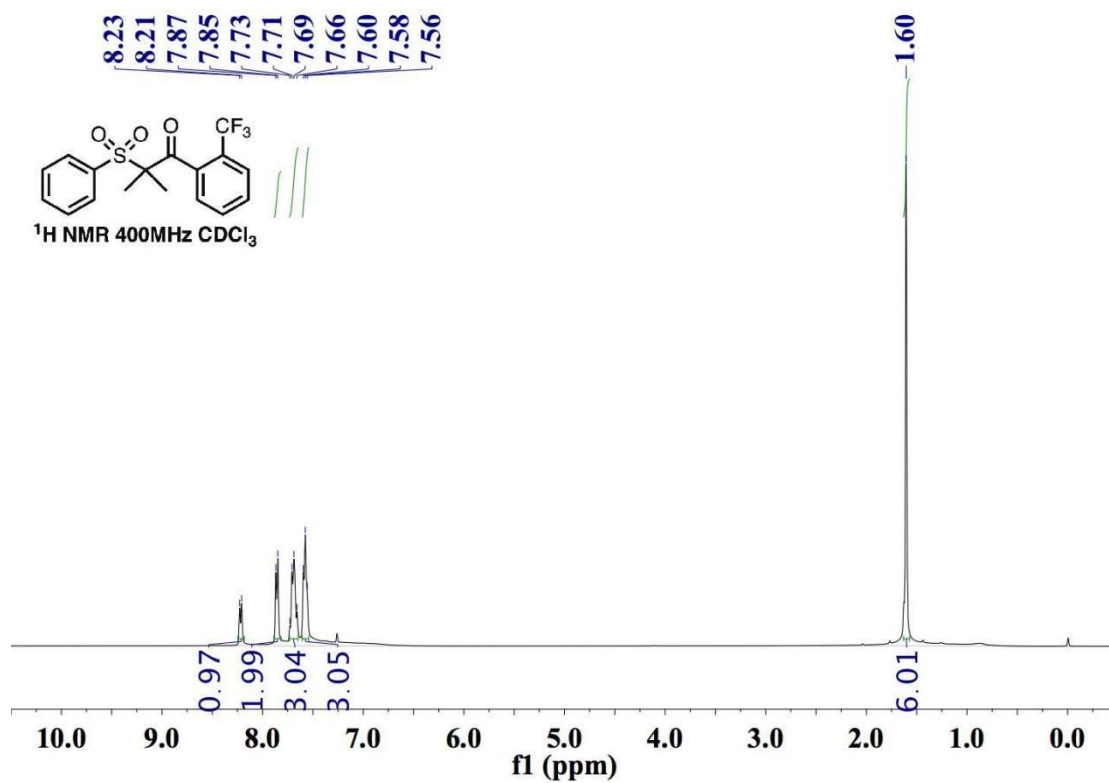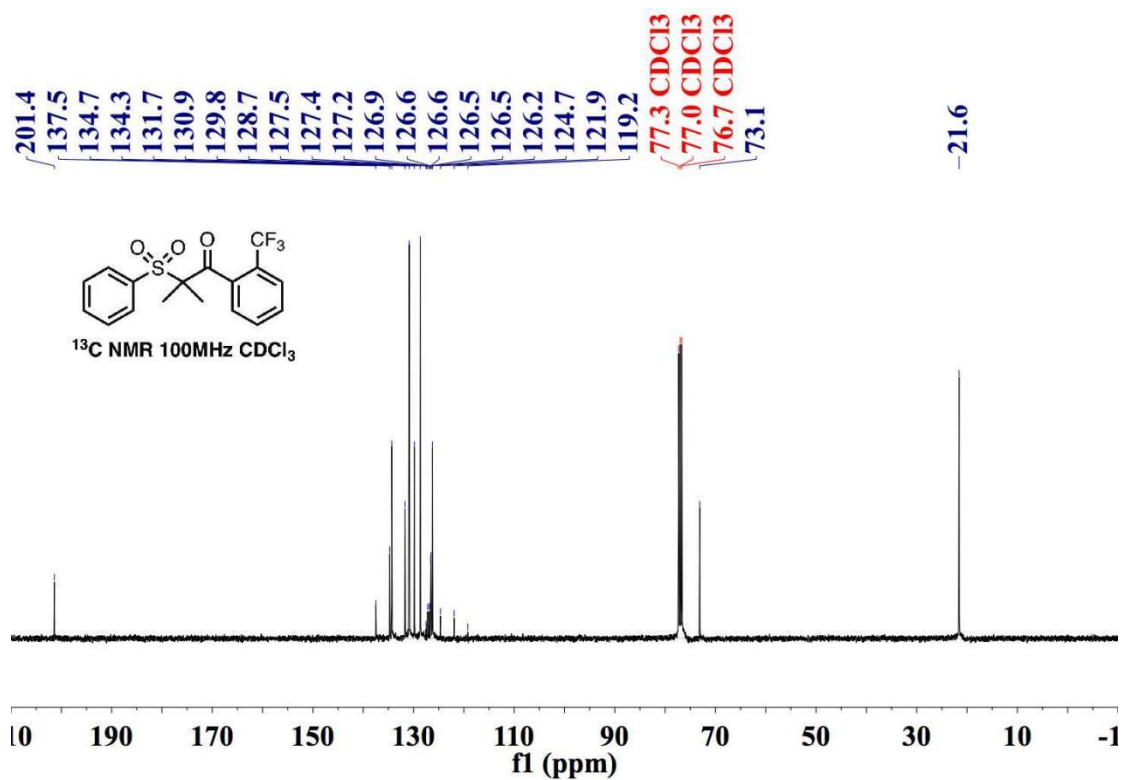

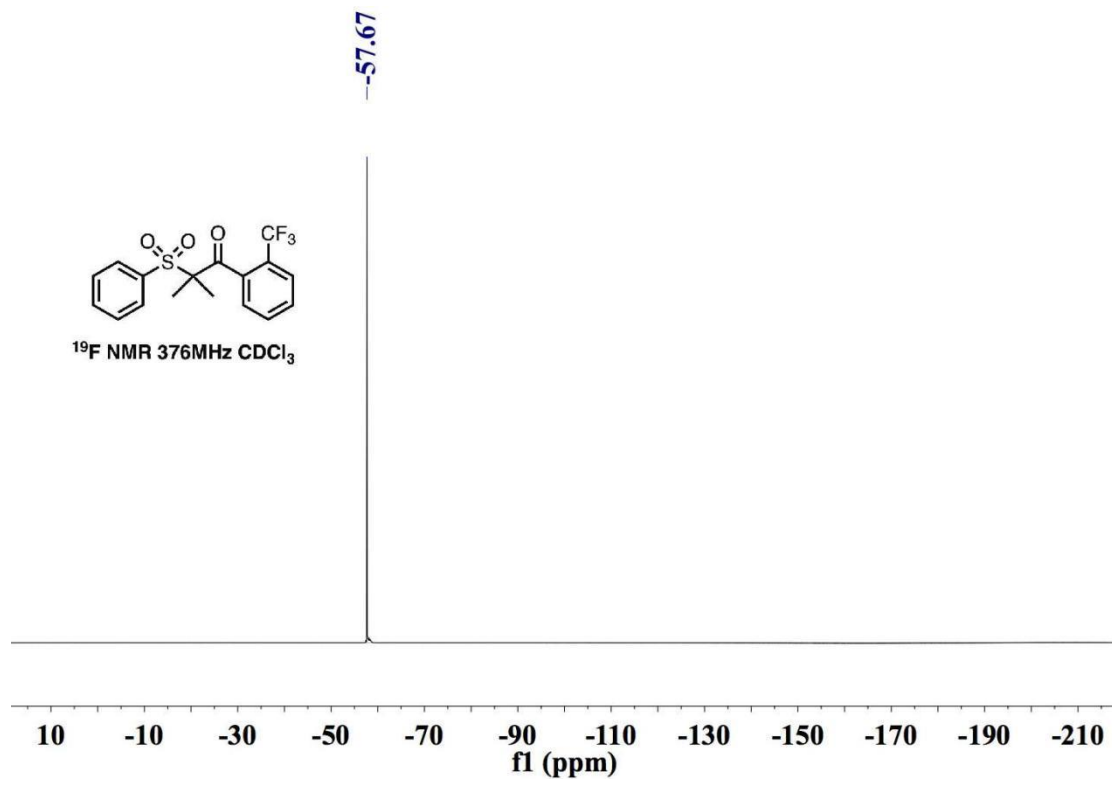

**1-(2-Fluorophenyl)-2-methyl-2-(phenylsulfonyl)propan-1-one (1t):**

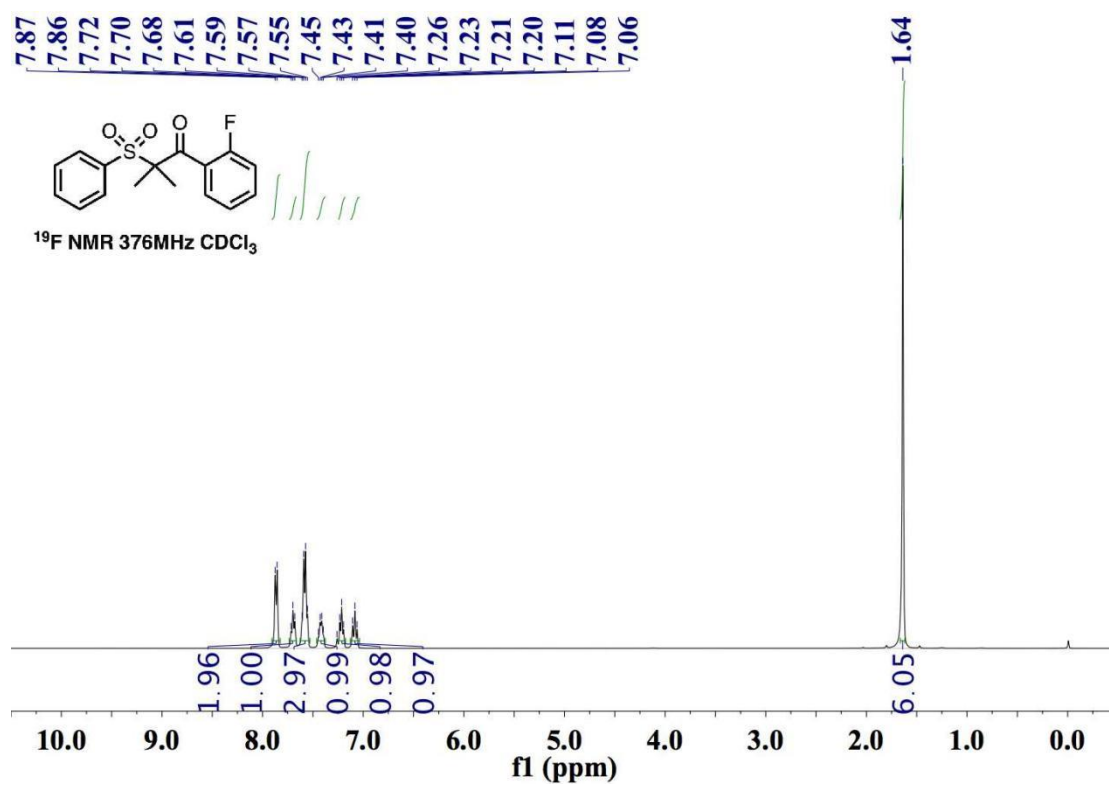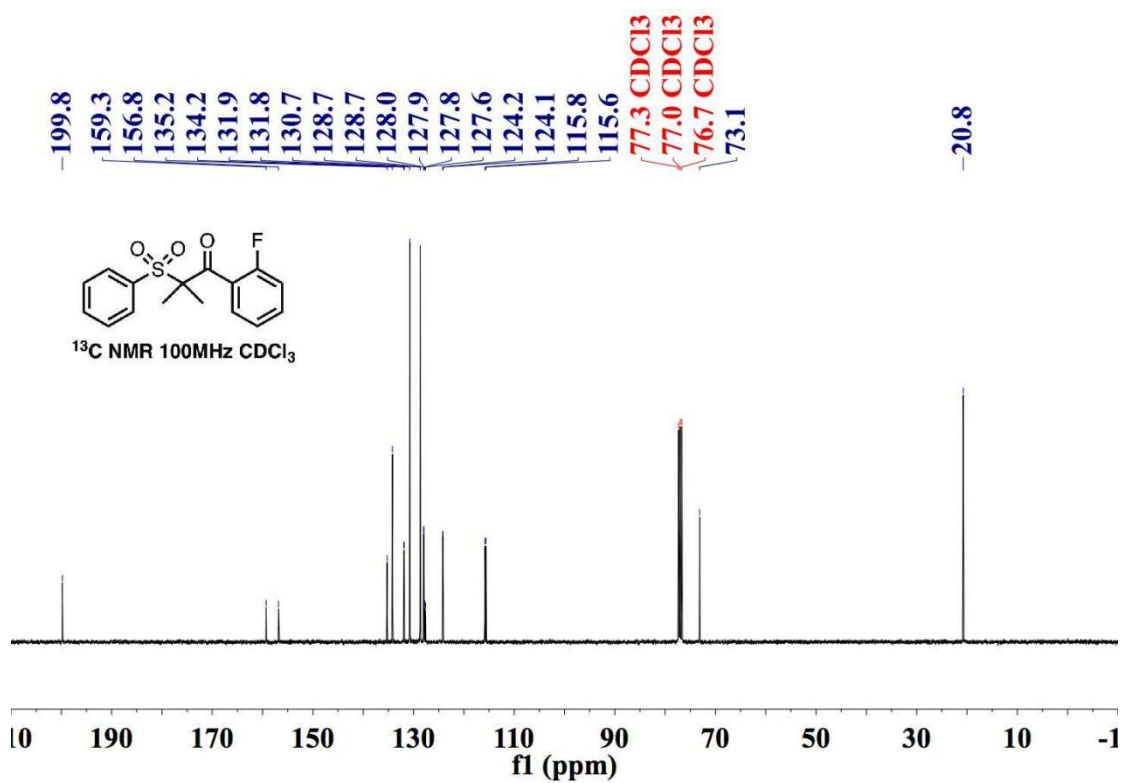



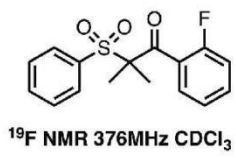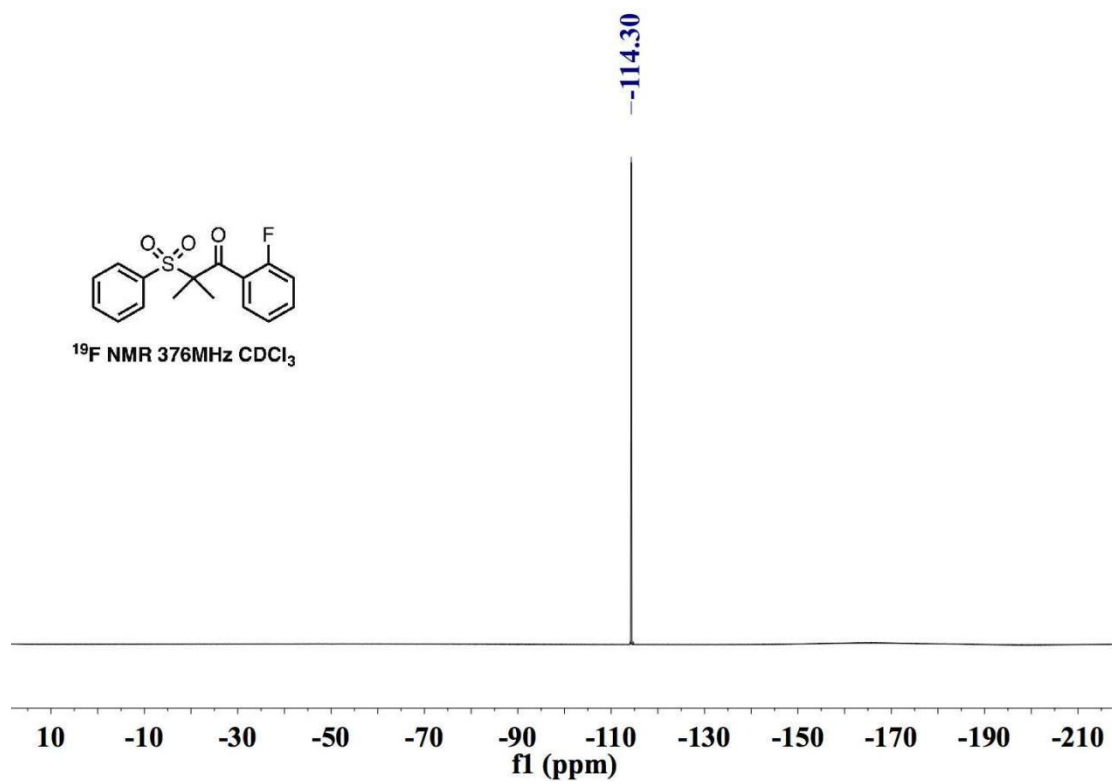

**2-Methyl-2-(phenylsulfonyl)-1-(m-tolyl)propan-1-one (1u):**

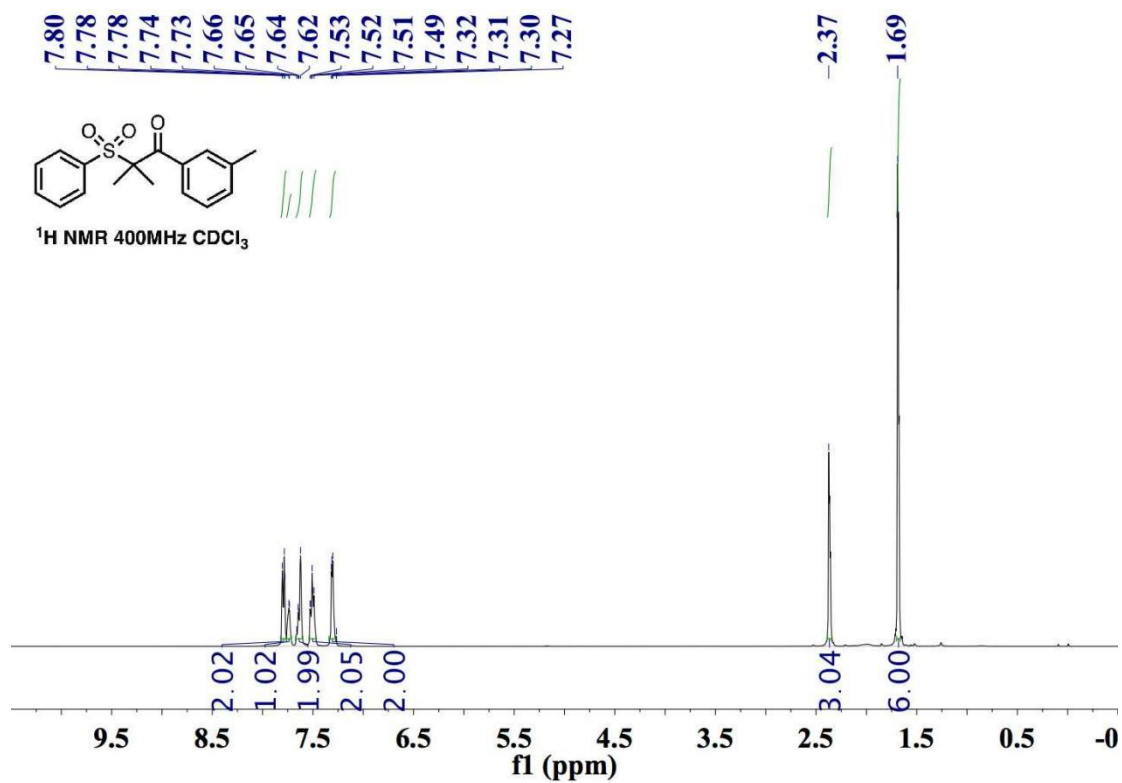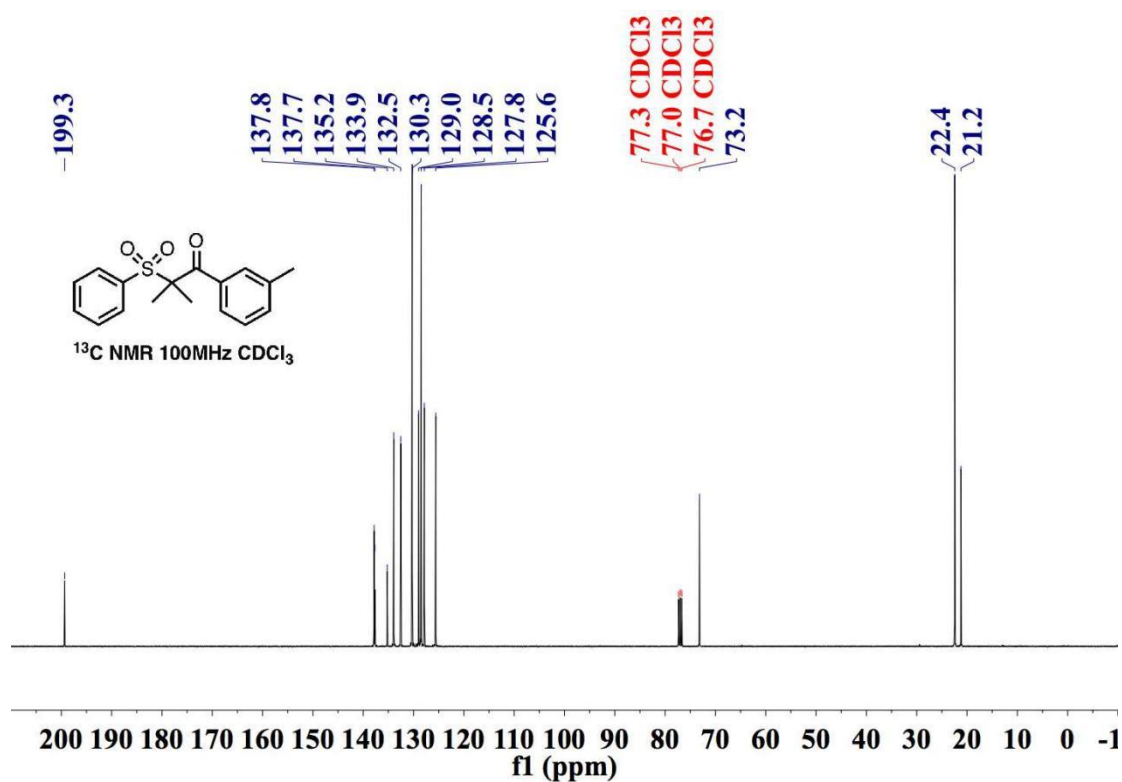

**1-(3-Methoxyphenyl)-2-methyl-2-(phenylsulfonyl)propan-1-one (1v):**

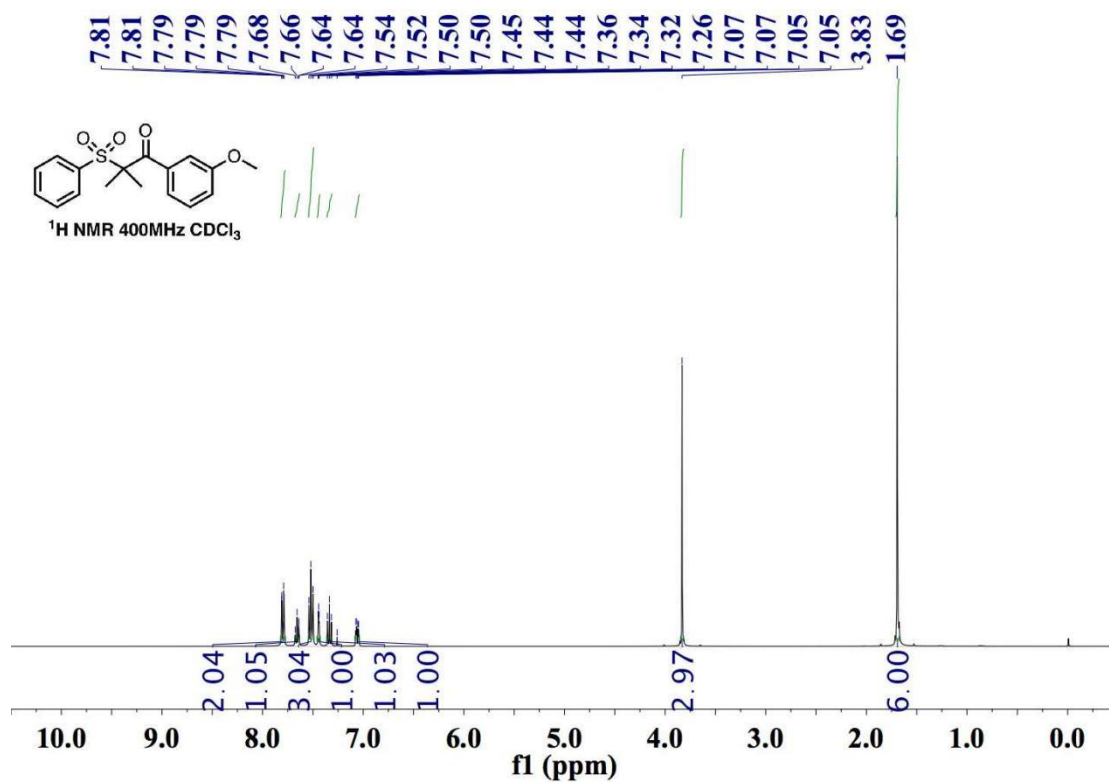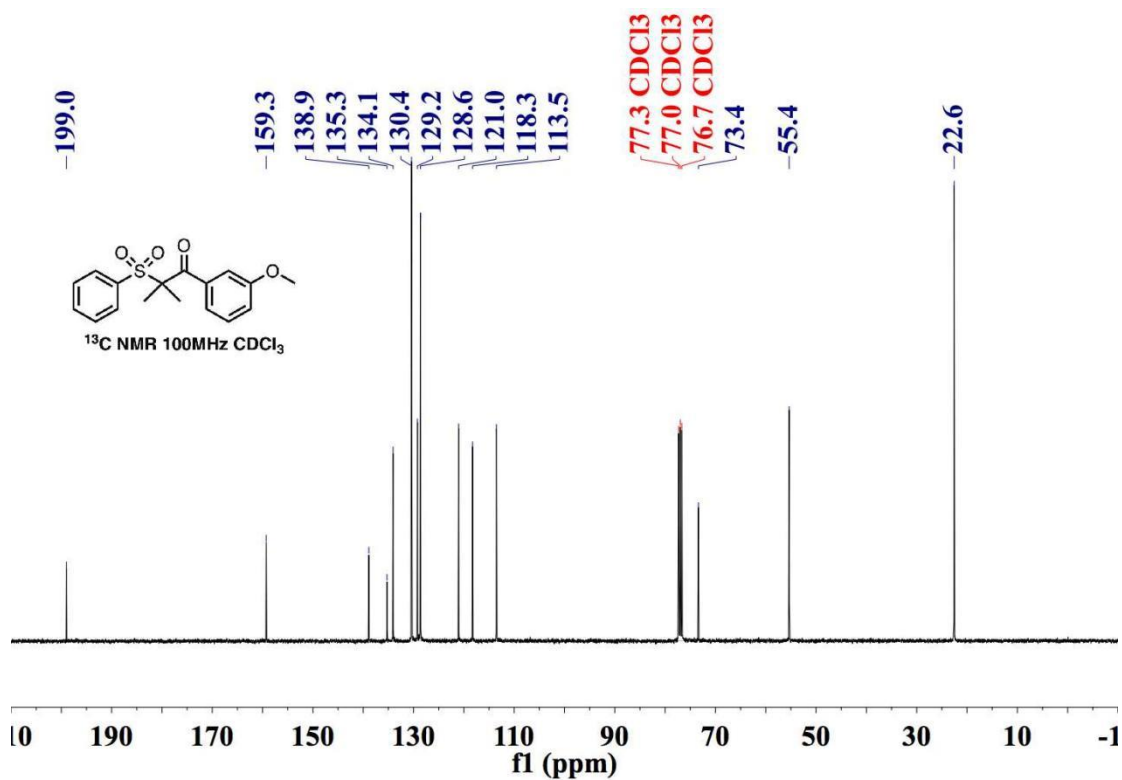

**1-(3-Bromophenyl)-2-methyl-2-(phenylsulfonyl)propan-1-one (1w):**

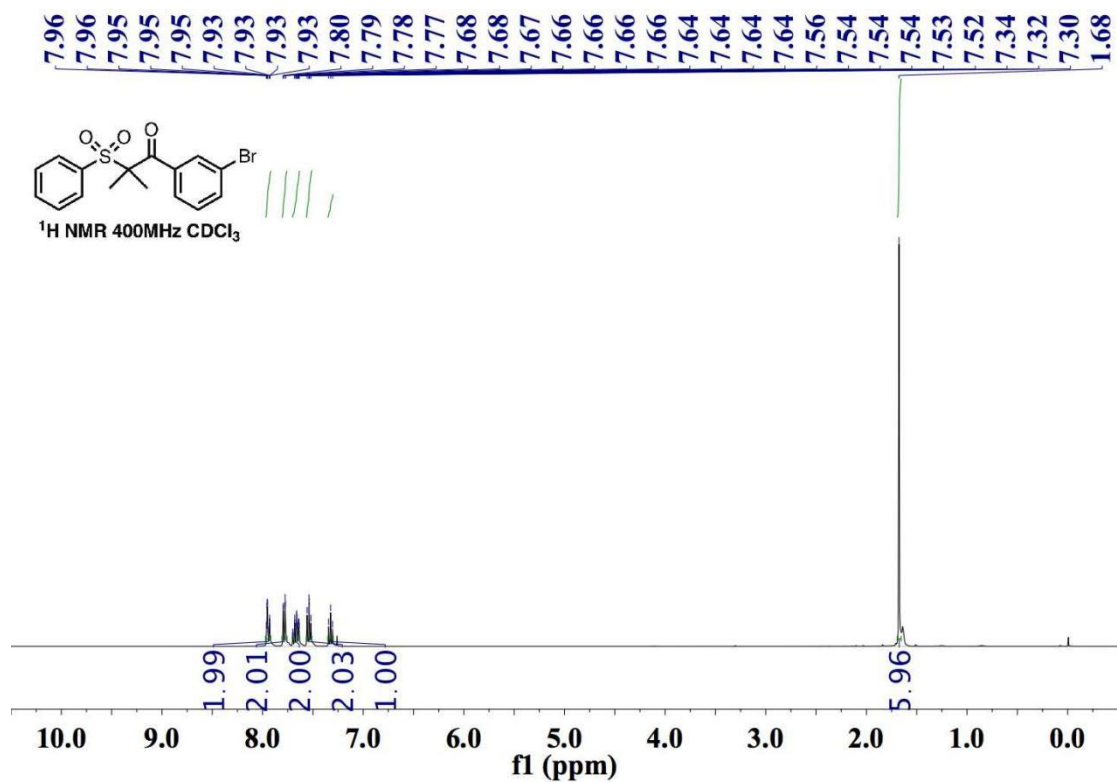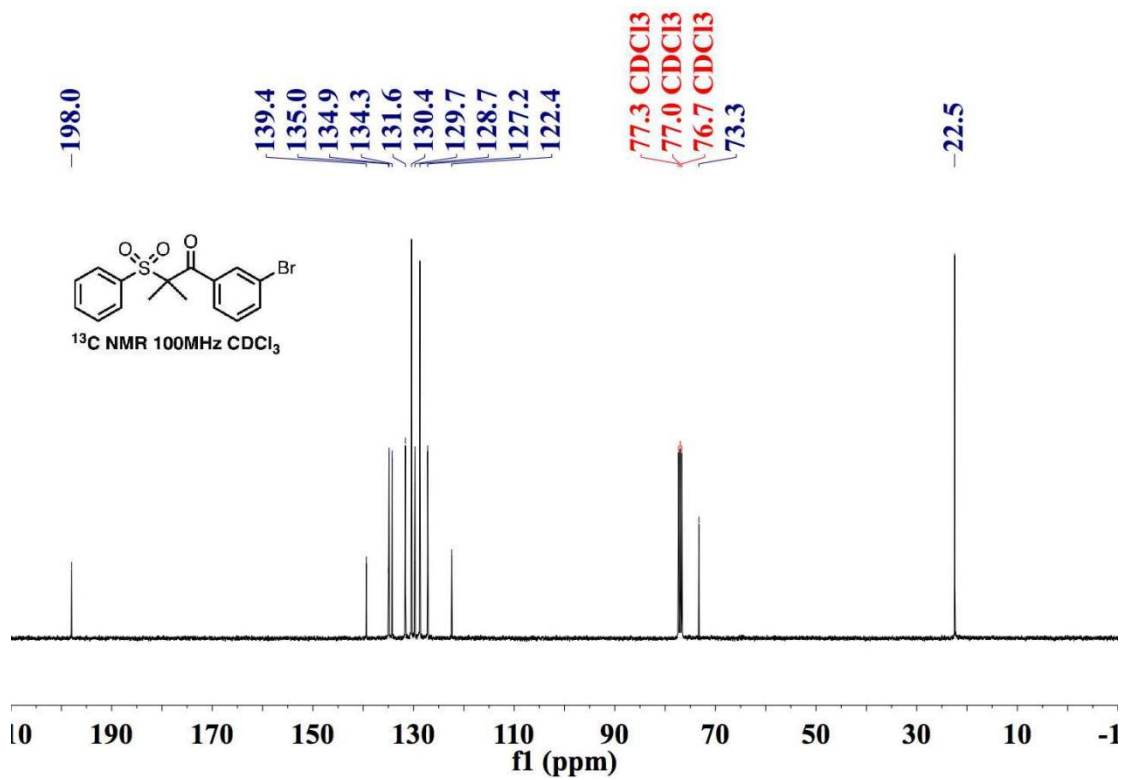

**2-Methyl-2-(phenylsulfonyl)-1-(p-tolyl)propan-1-one (1x):**

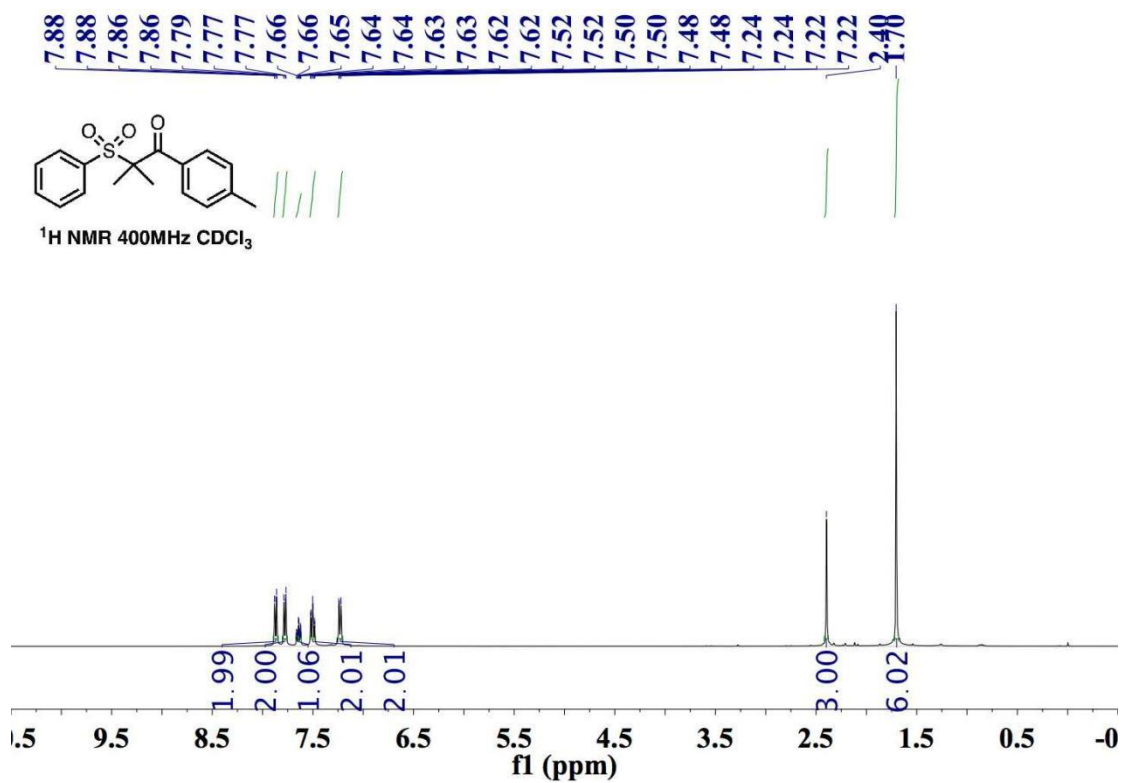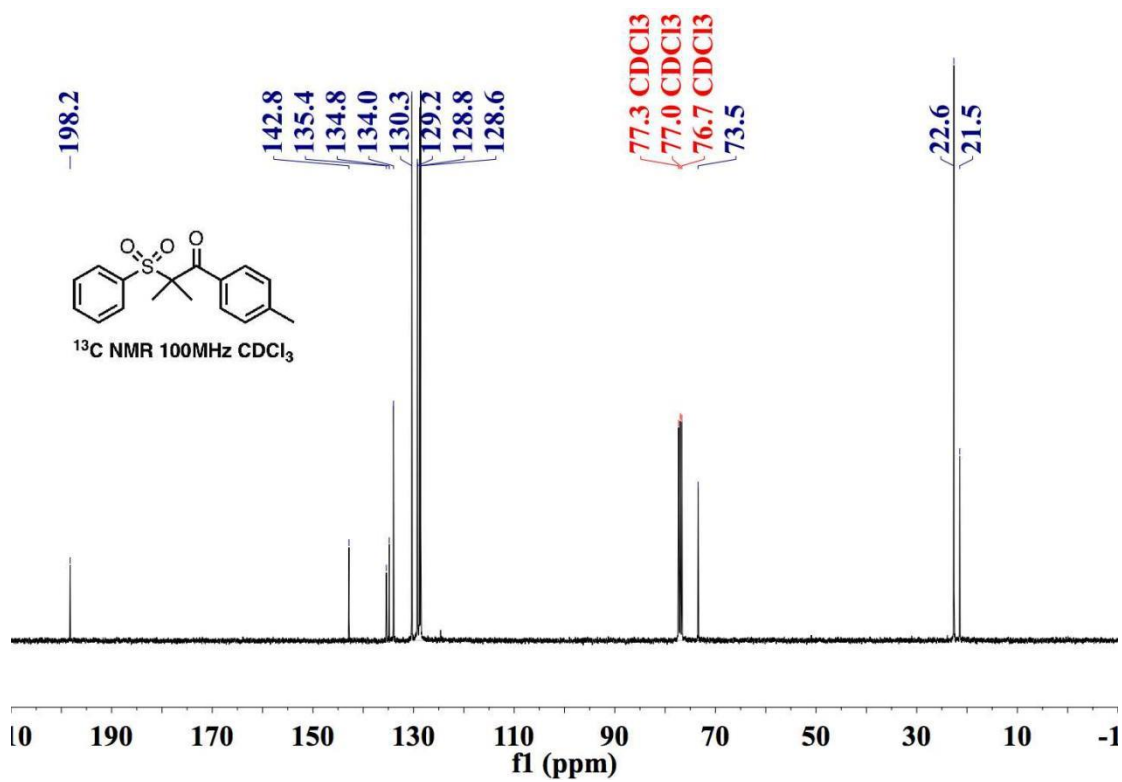

1-(4-methoxyphenyl)-2-methyl-2-(phenylsulfonyl)propan-1-one (1y):

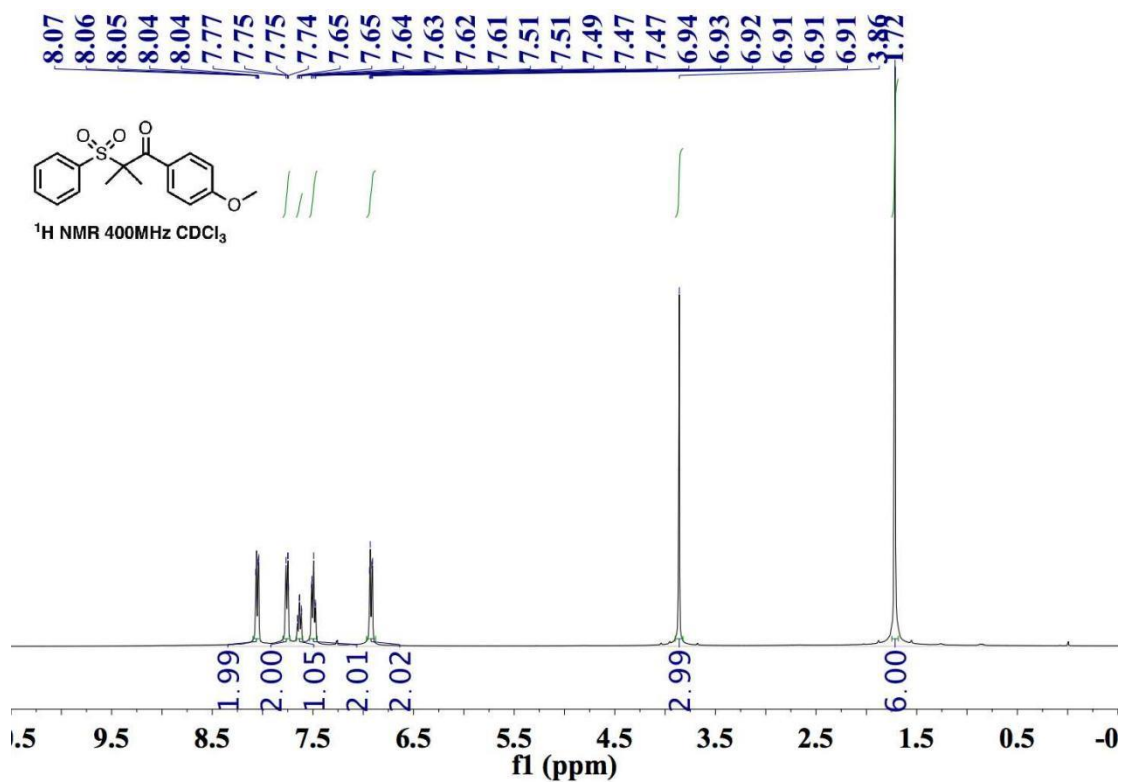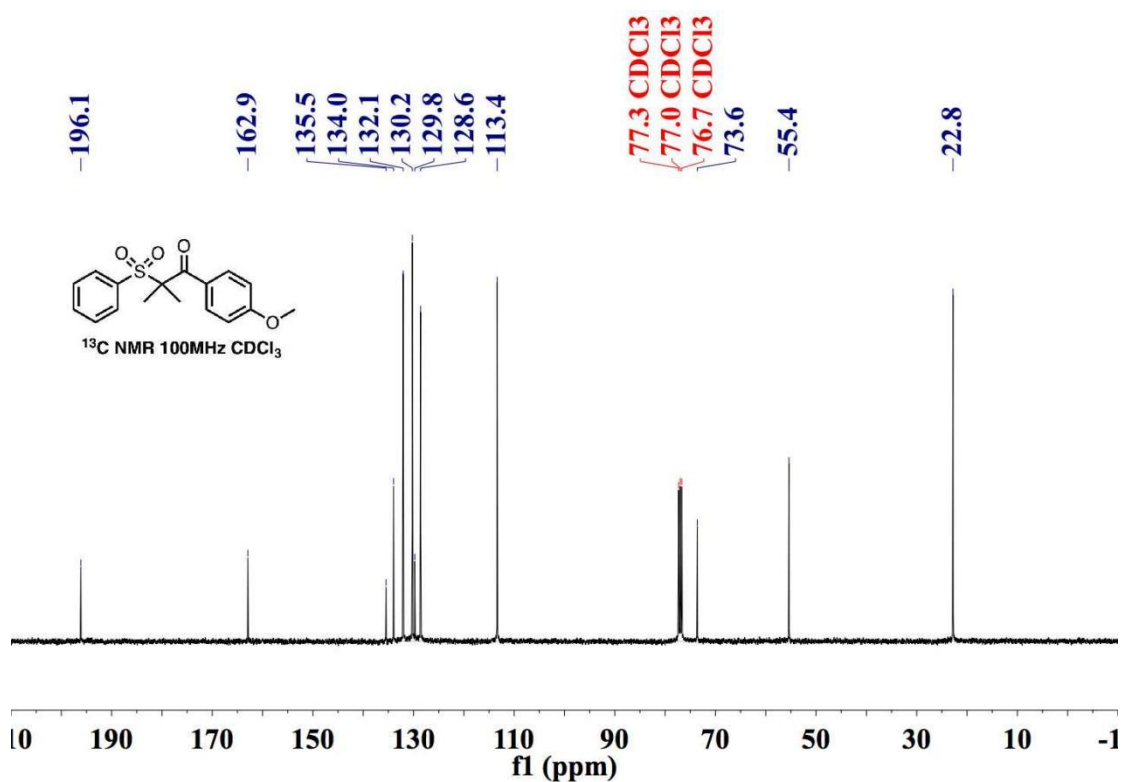

1-(4-Fluorophenyl)-2-methyl-2-(phenylsulfonyl)propan-1-one (1z):

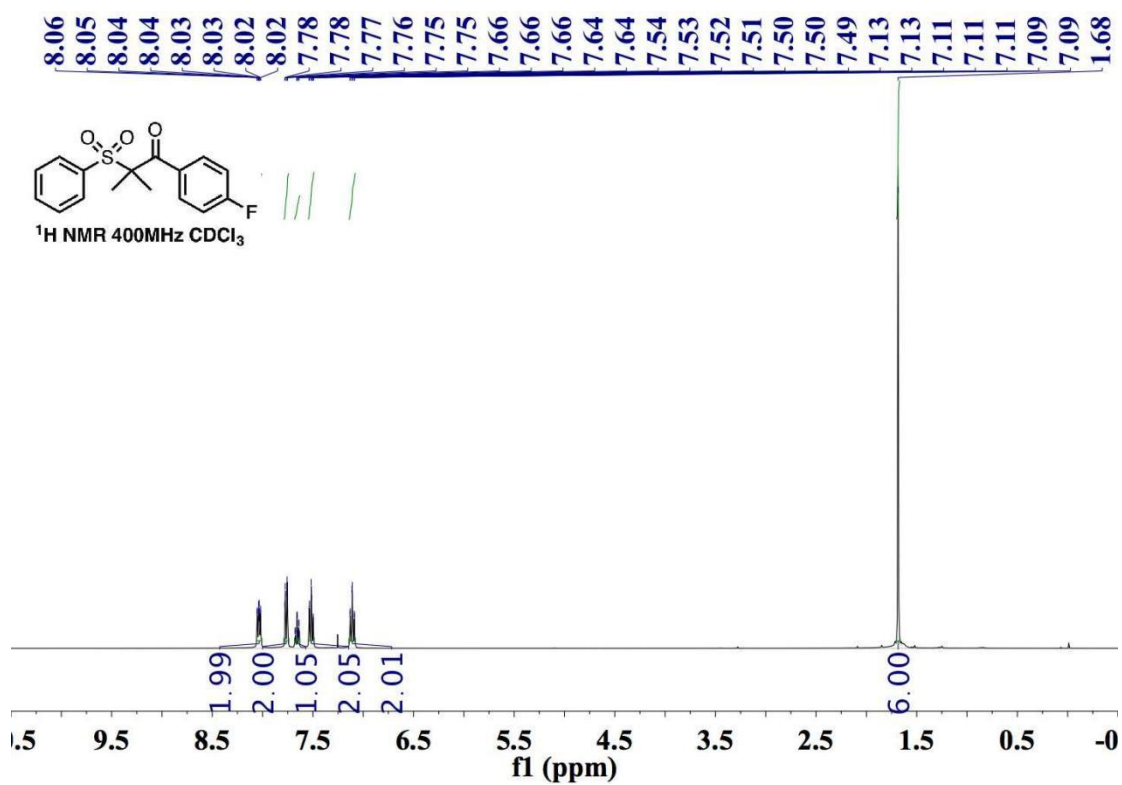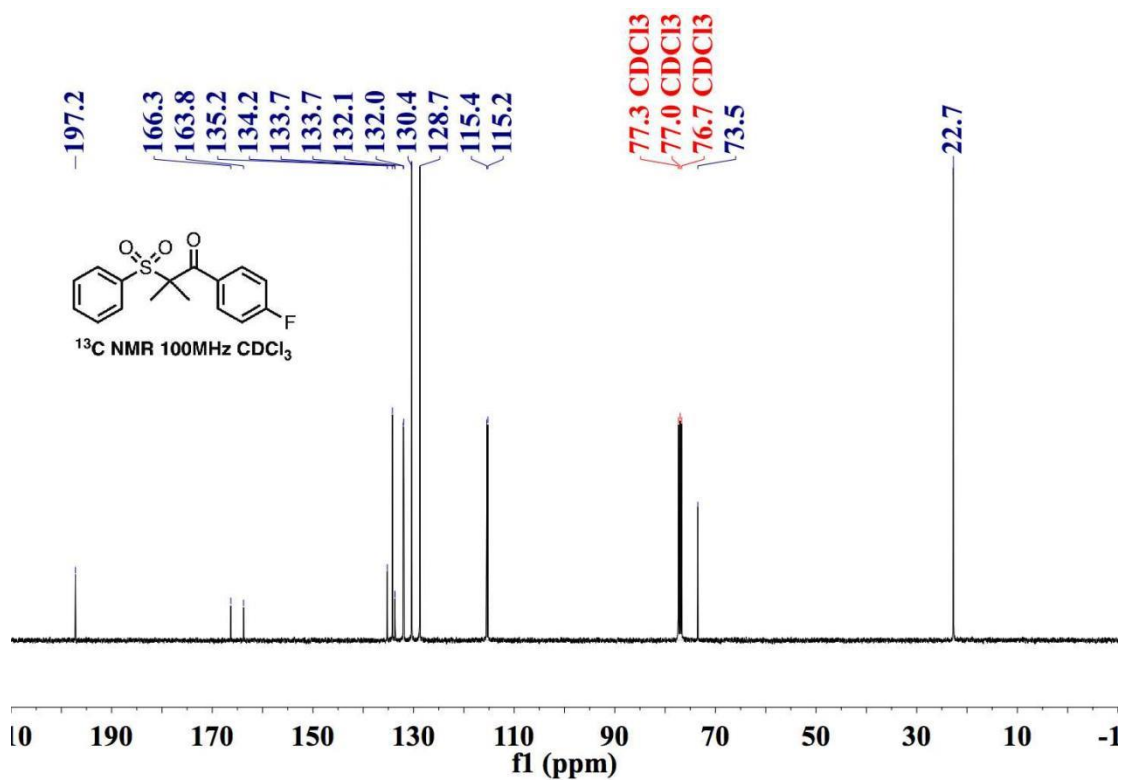

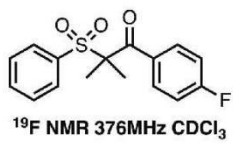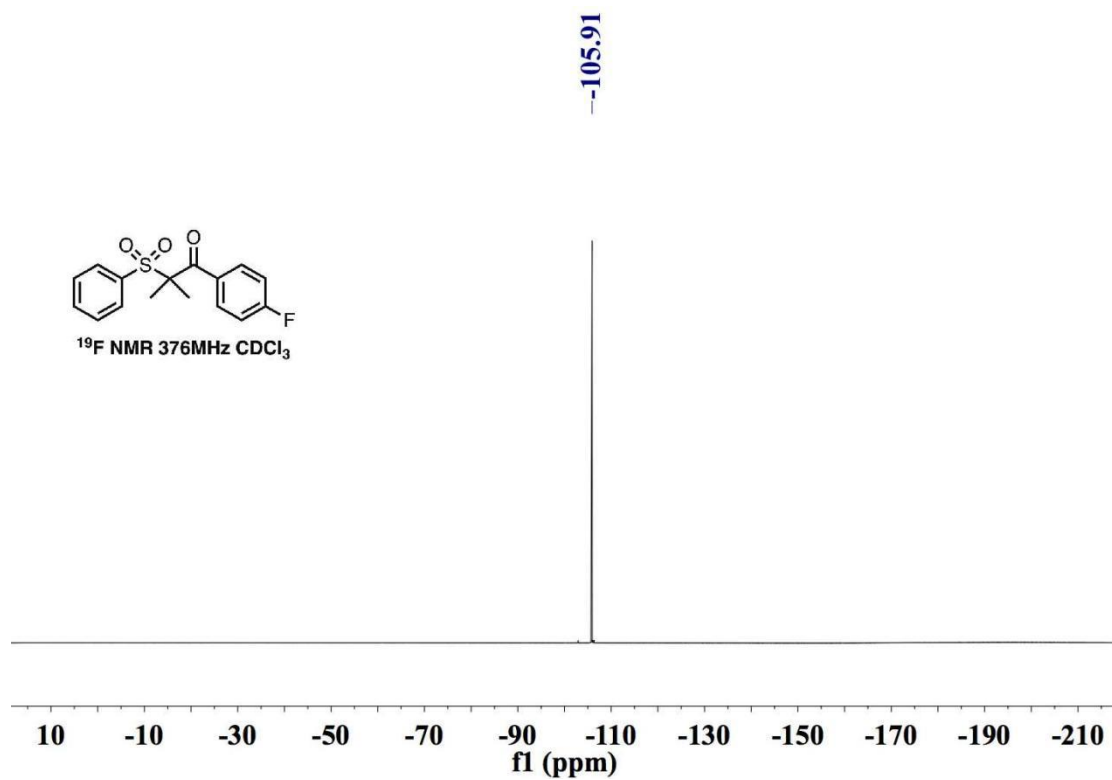



2-Methyl-2-(phenylsulfonyl)-1-(4-(trifluoromethyl)phenyl)propan-1-one (1aa):

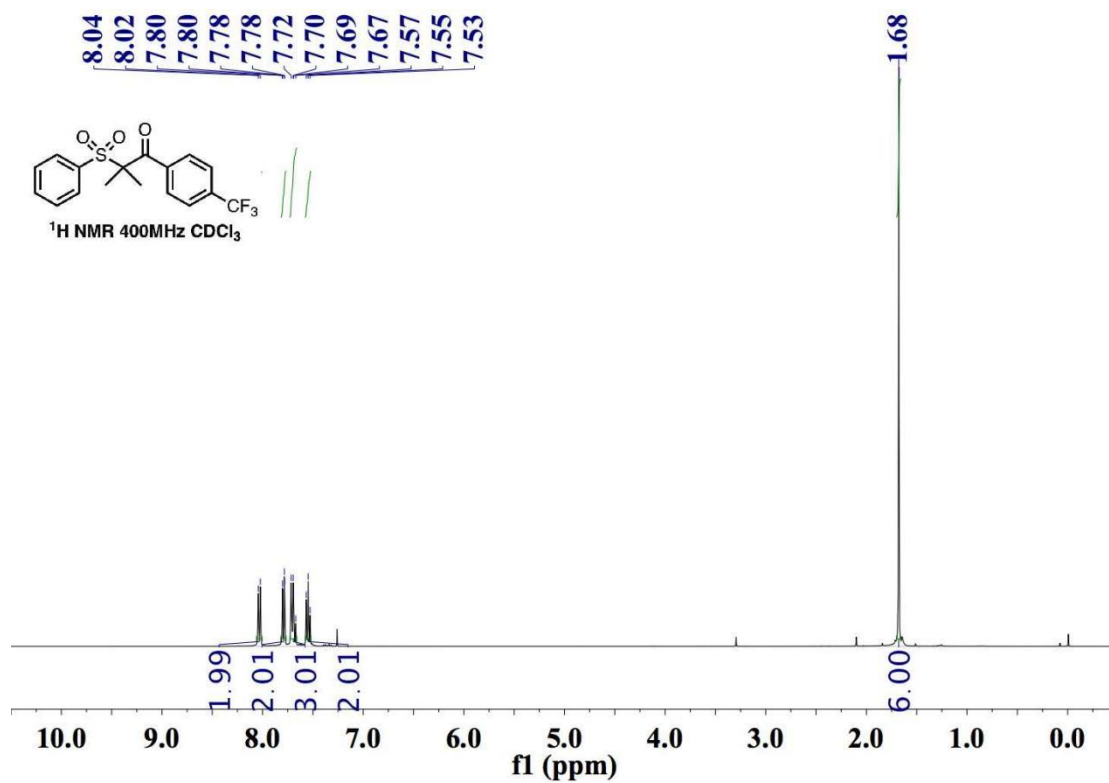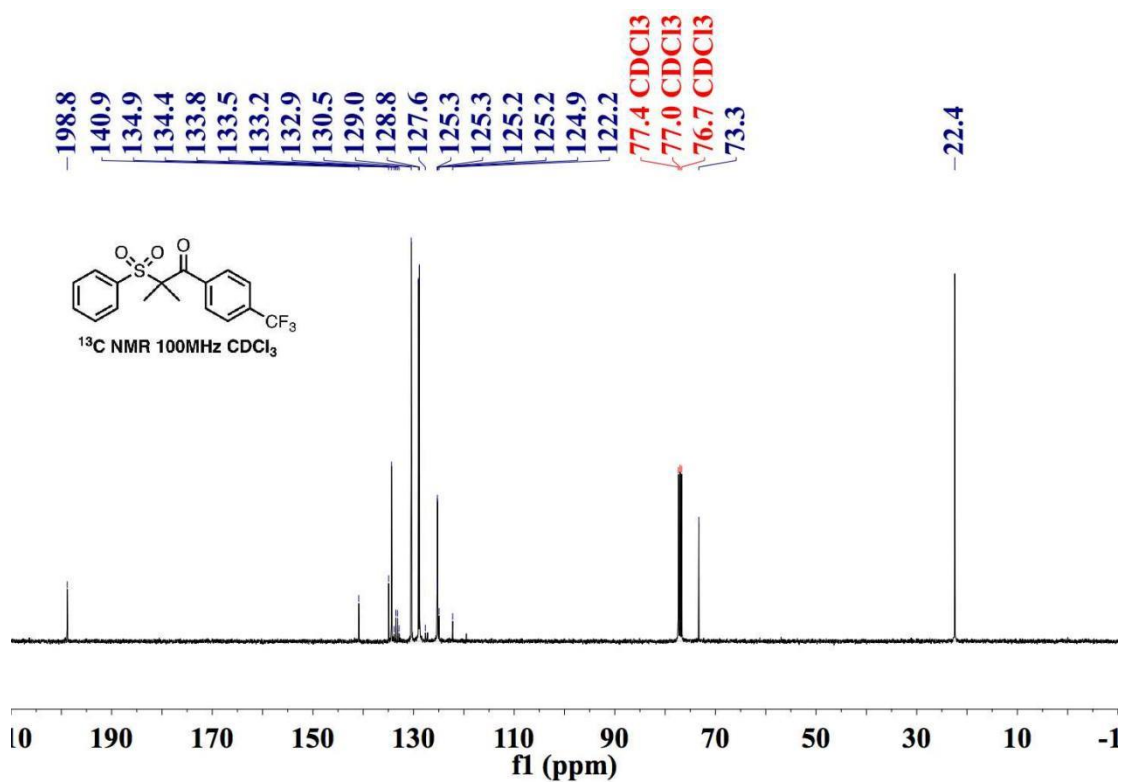

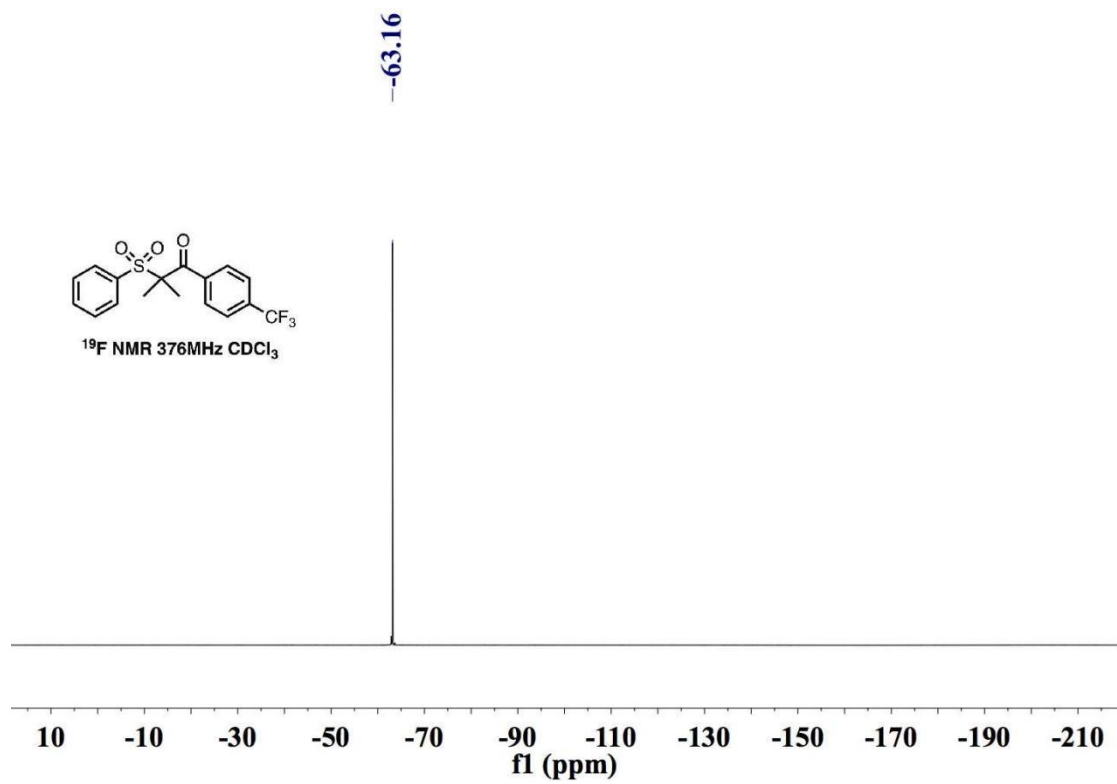

**1-(4-Bromophenyl)-2-methyl-2-(phenylsulfonyl)propan-1-one (1ab):**

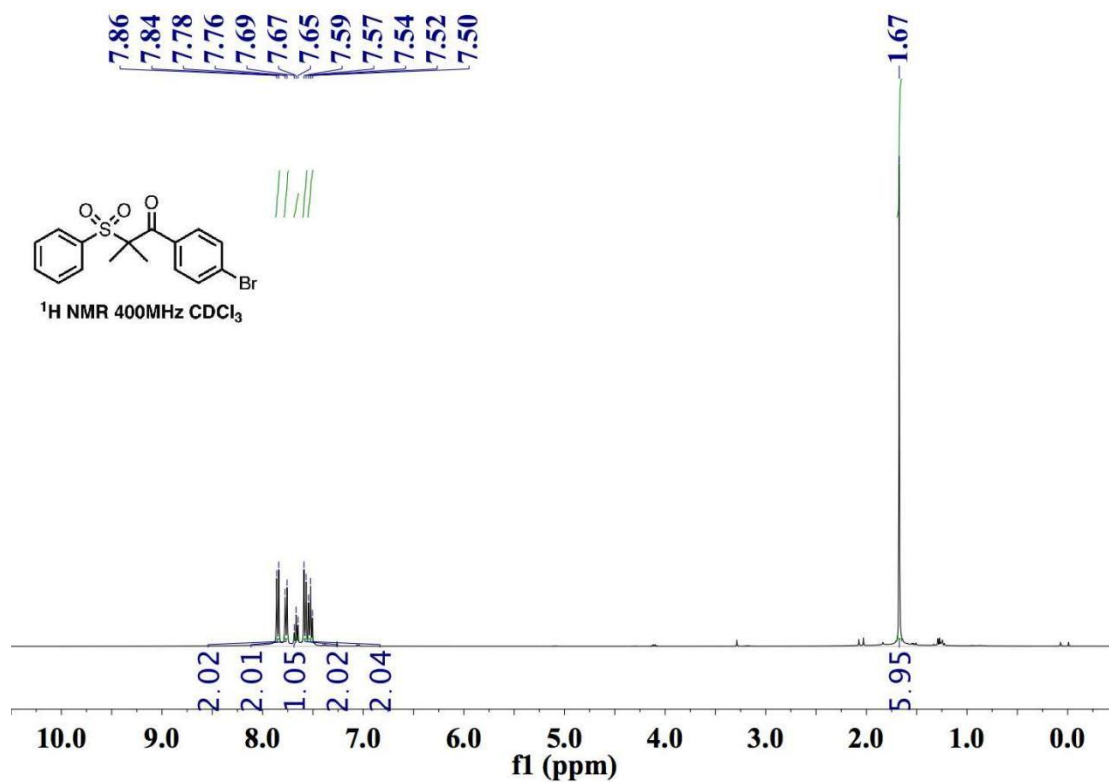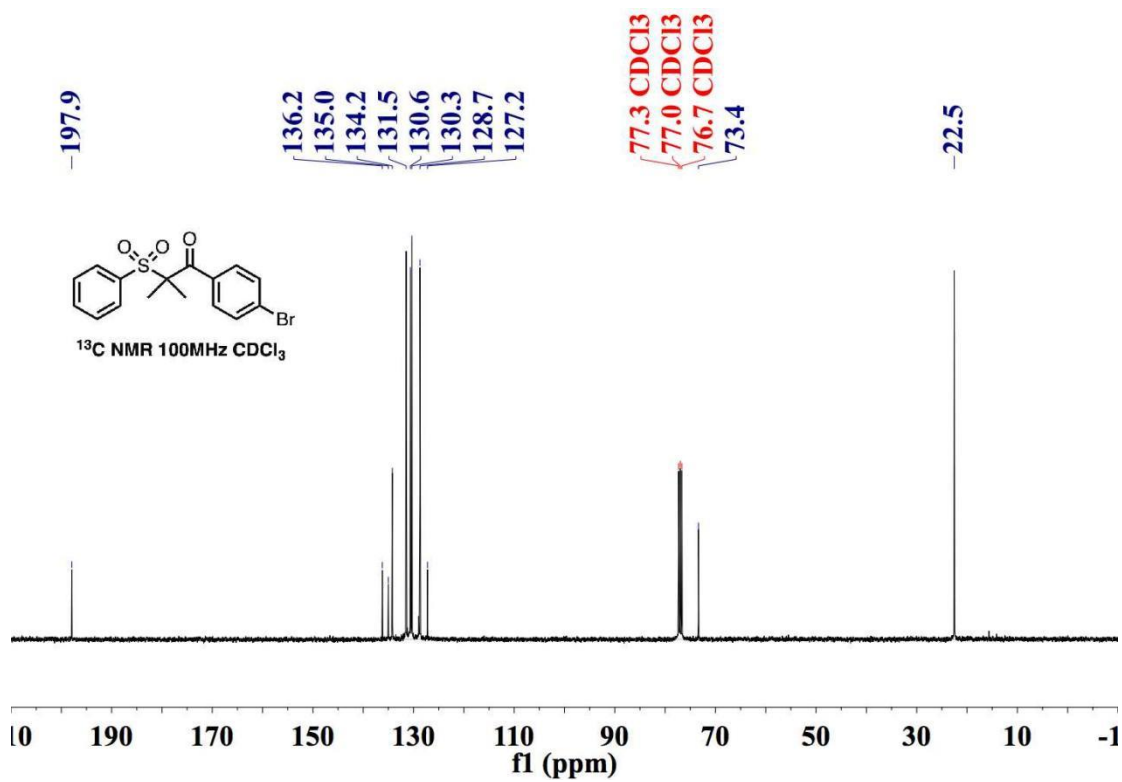

**1-(3,4-Dimethoxyphenyl)-2-methyl-2-(phenylsulfonyl)propan-1-one (1ac):**

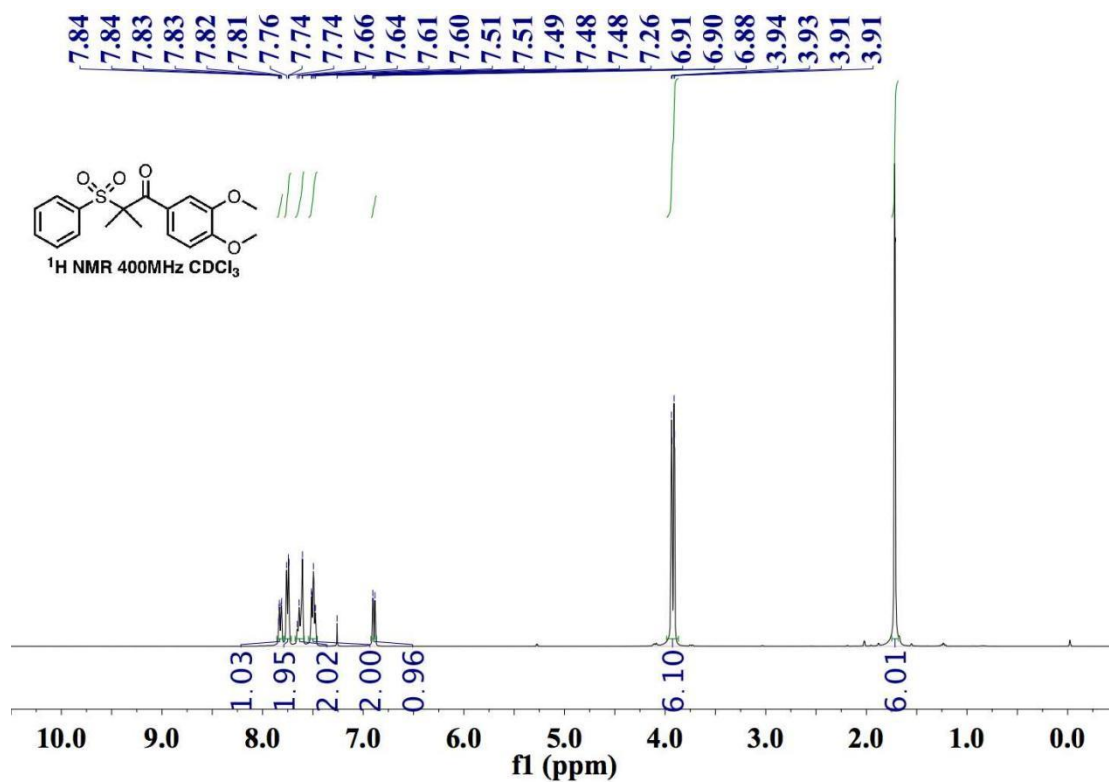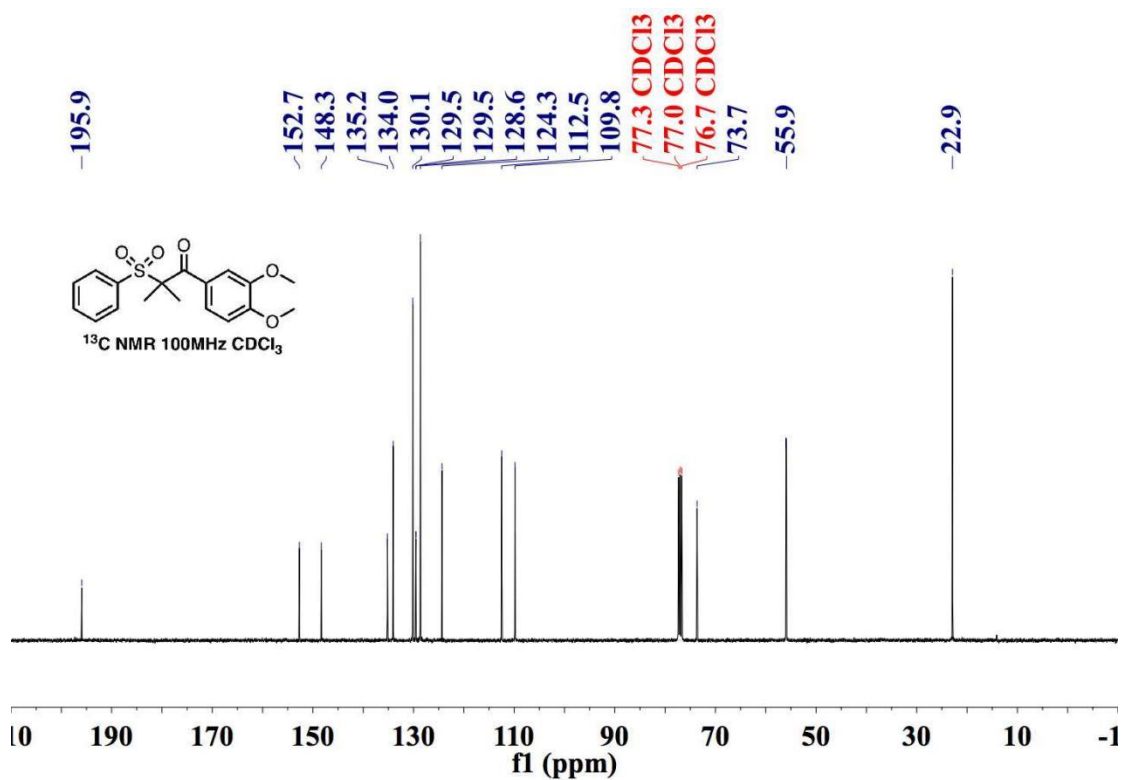

1-(2,4-Dichlorophenyl)-2-methyl-2-(phenylsulfonyl)propan-1-one (1ad) :

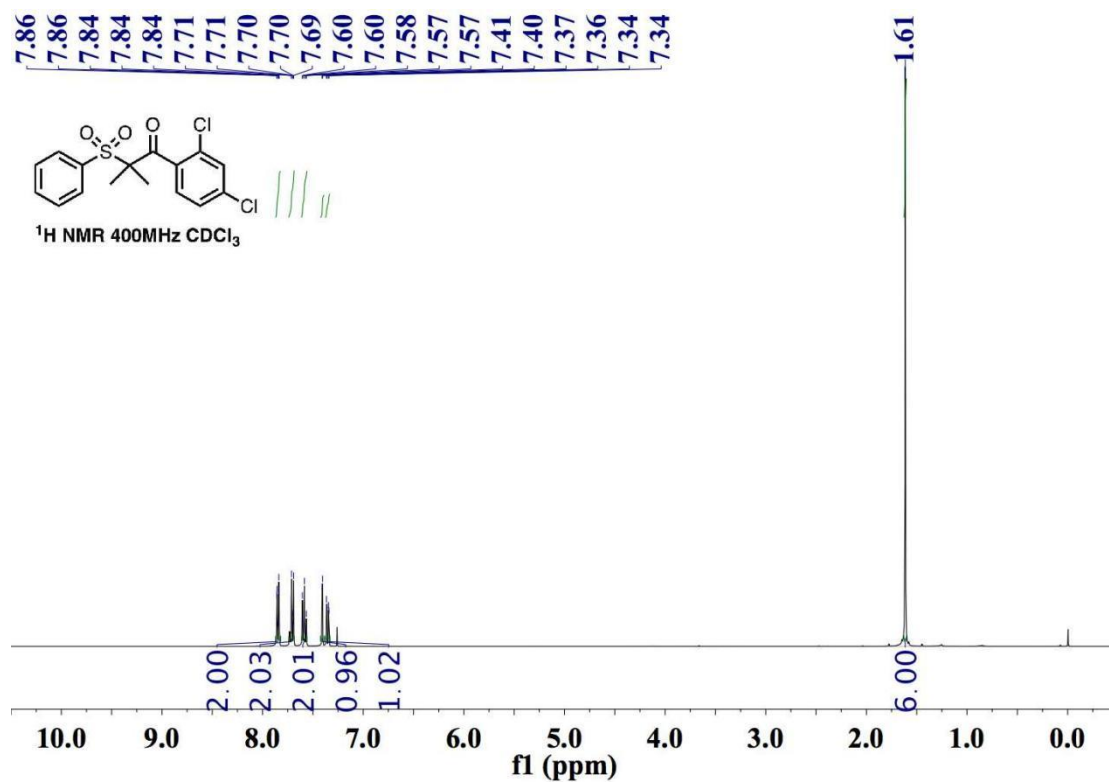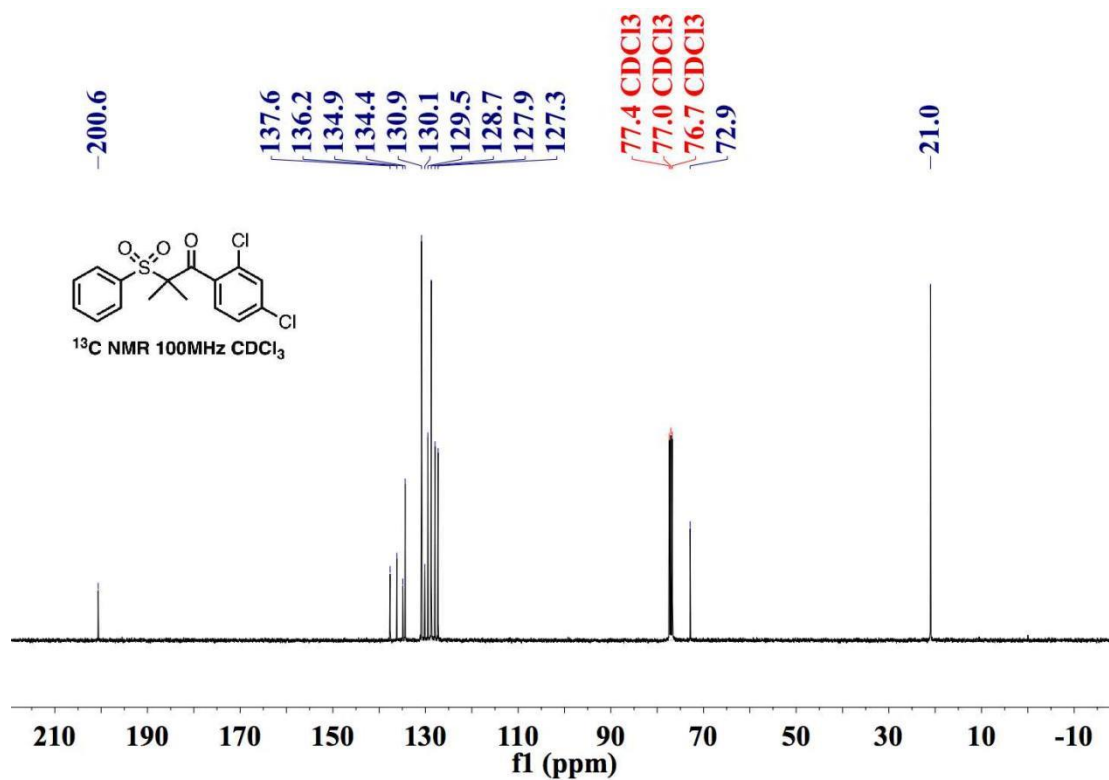

1-(4-Fluoro-2-iodophenyl)-2-methyl-2-(phenylsulfonyl)propan-1-one (1ae)

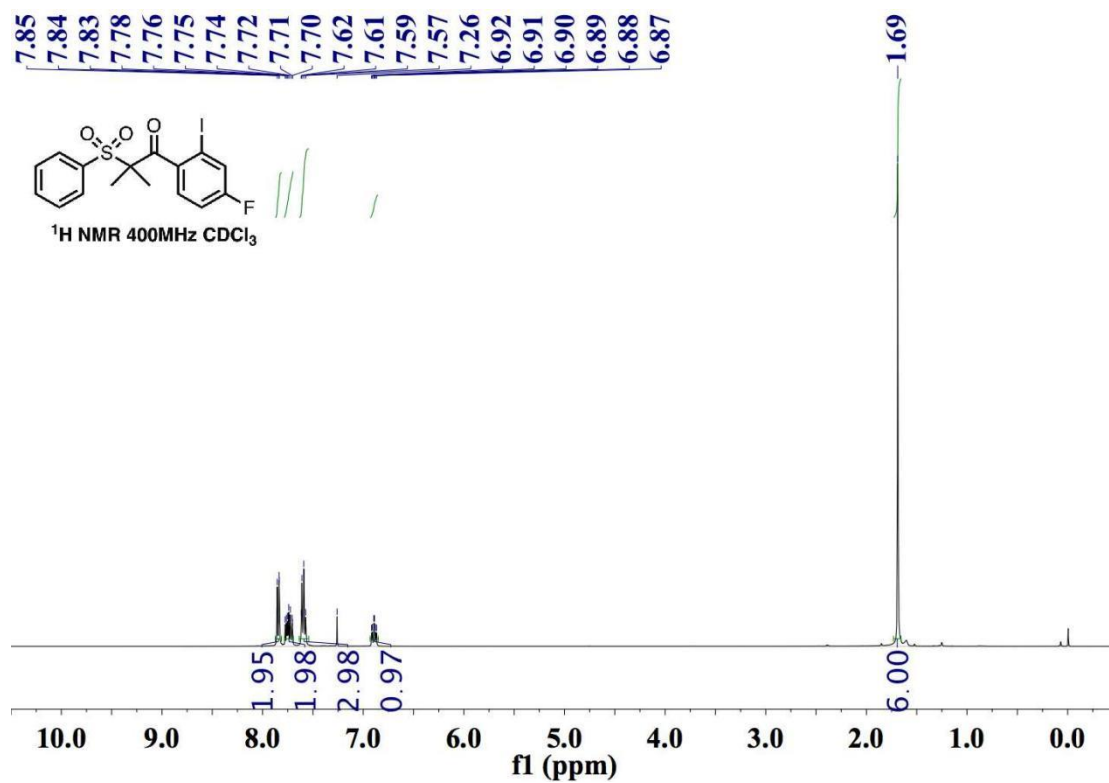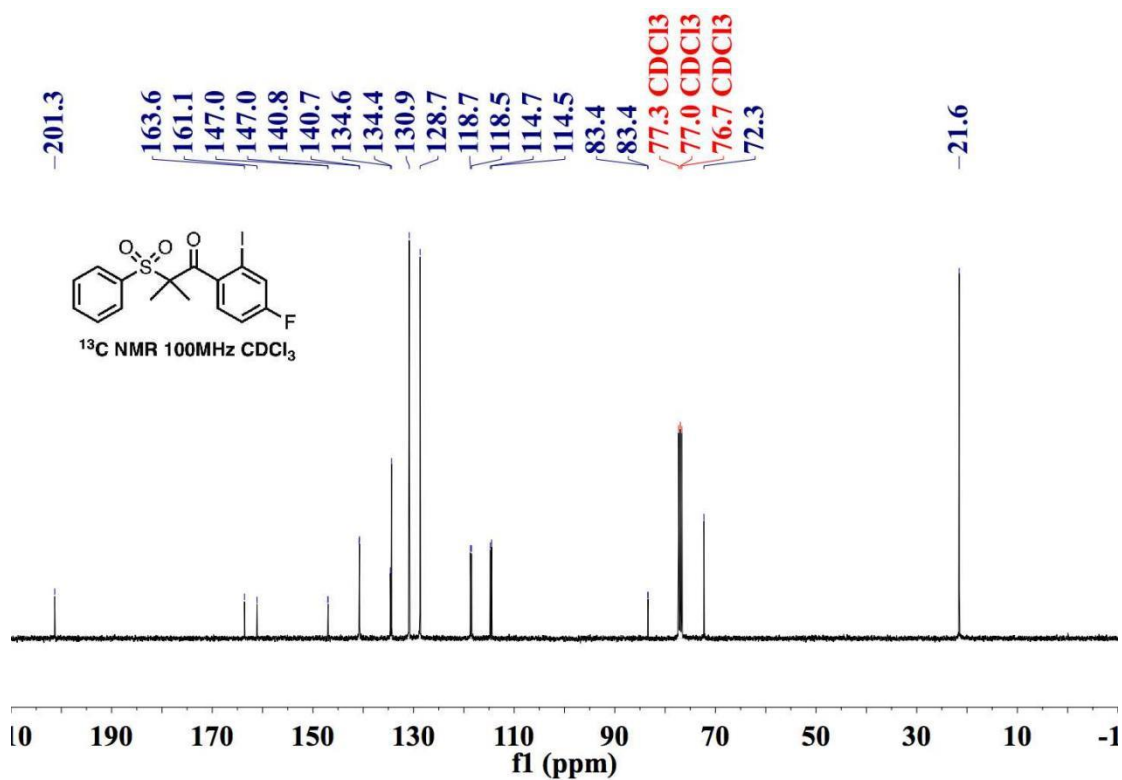

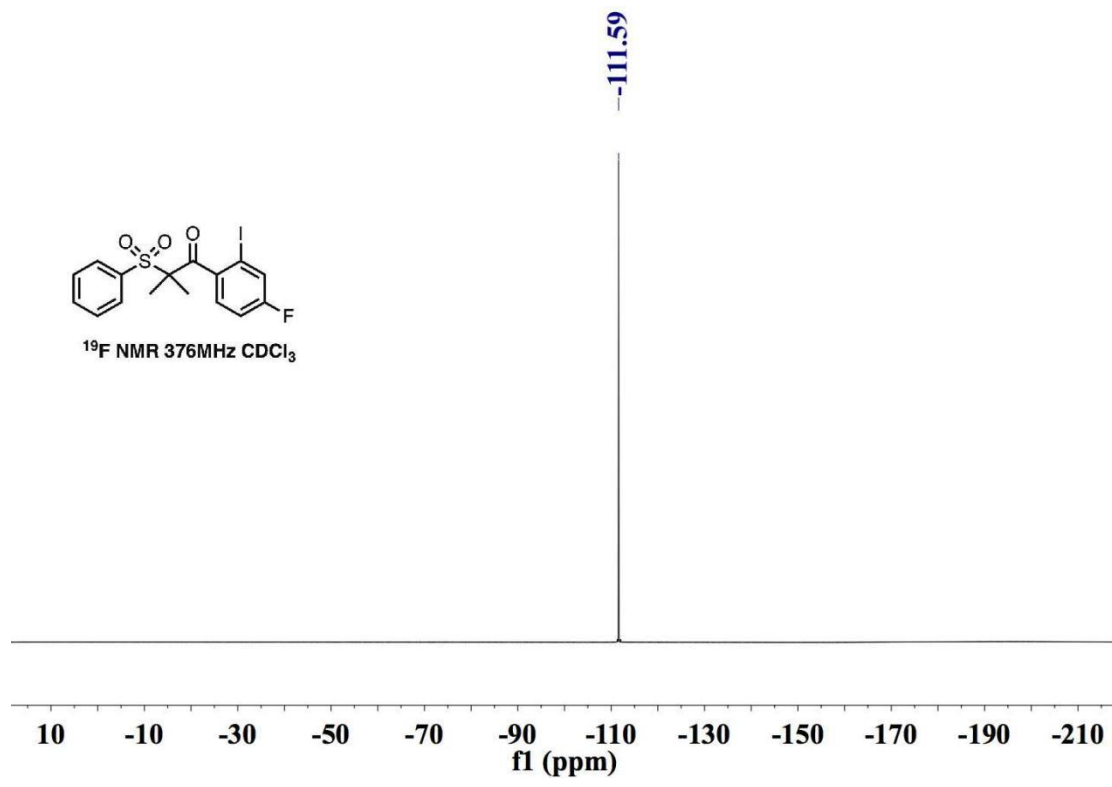

2-Methyl-2-(phenylsulfonyl)-1-(pyridin-2-yl)propan-1-one (1af) :

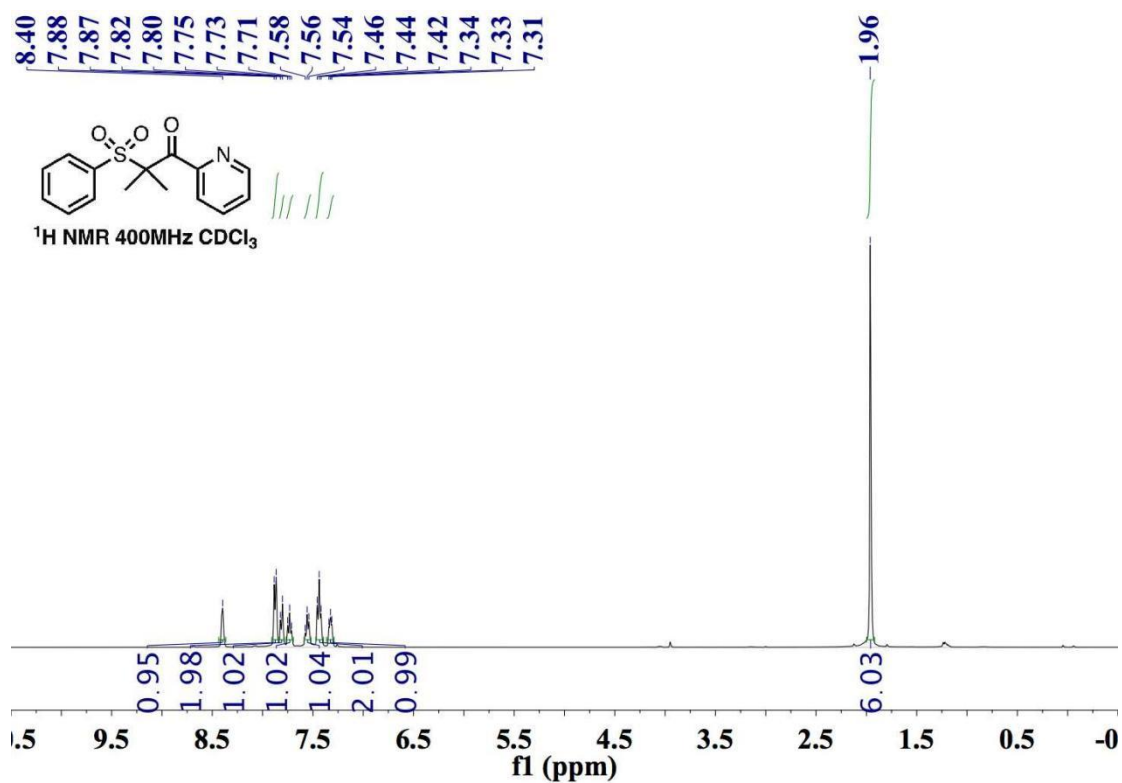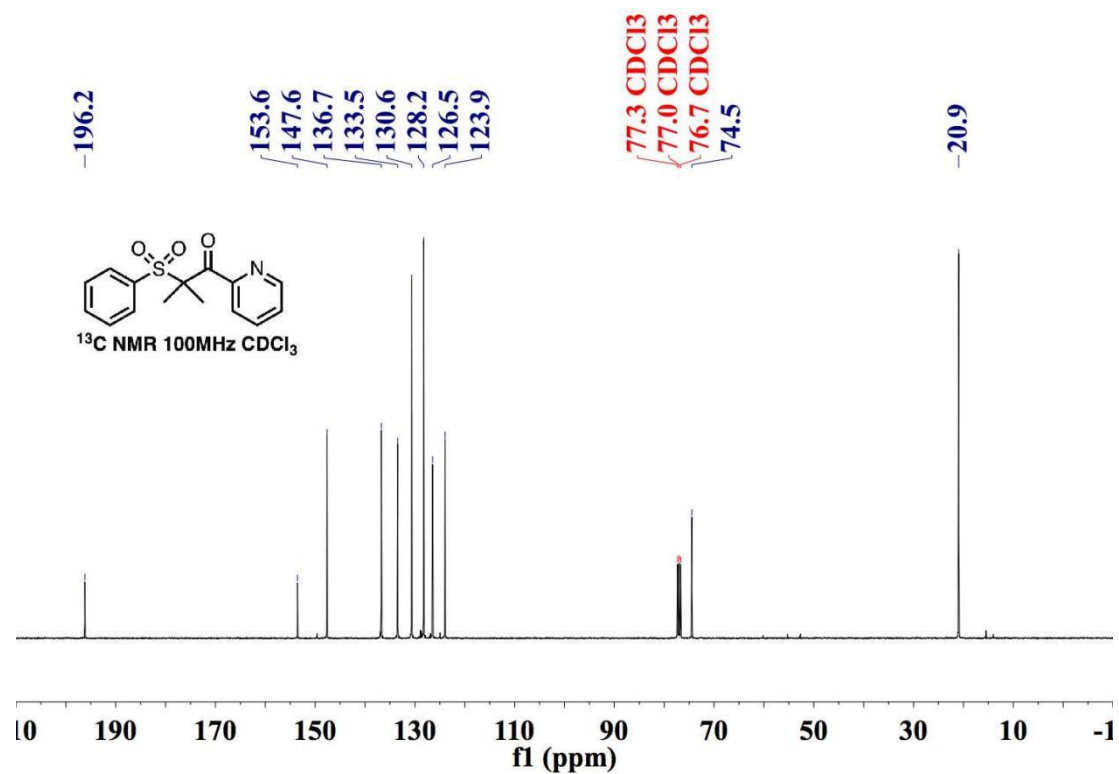



**2-Methyl-2-(phenylsulfonyl)-1-(thiophen-2-yl)propan-1-one (1ag):**

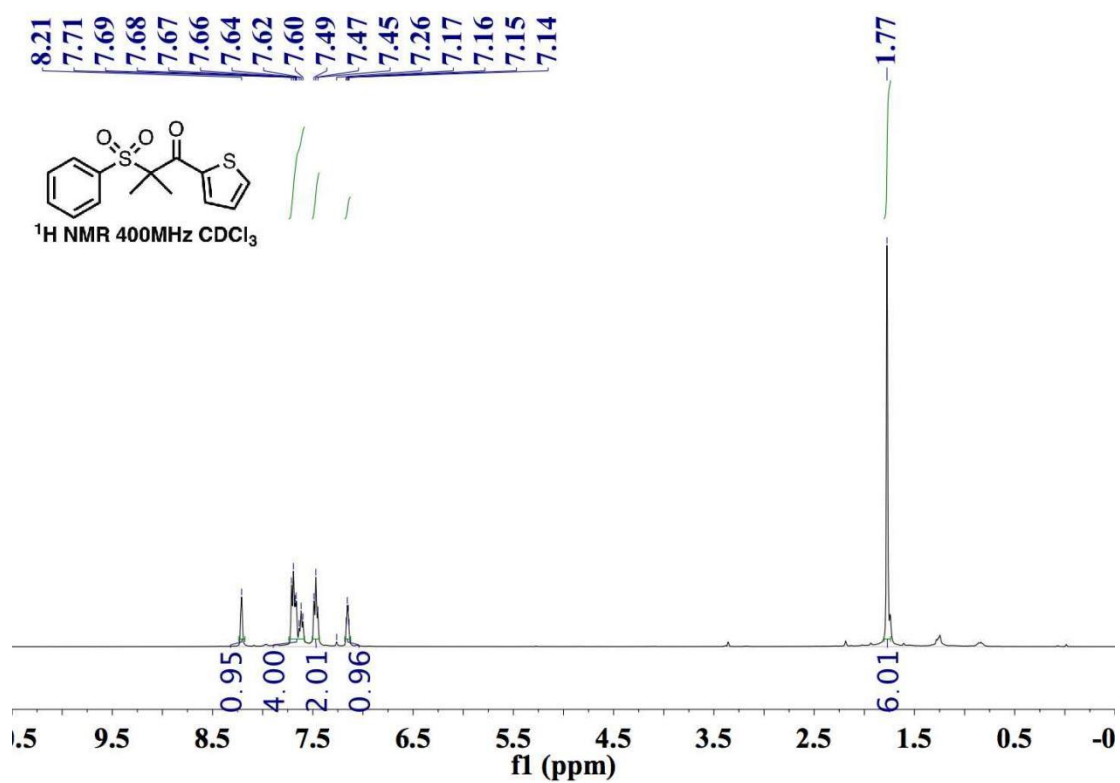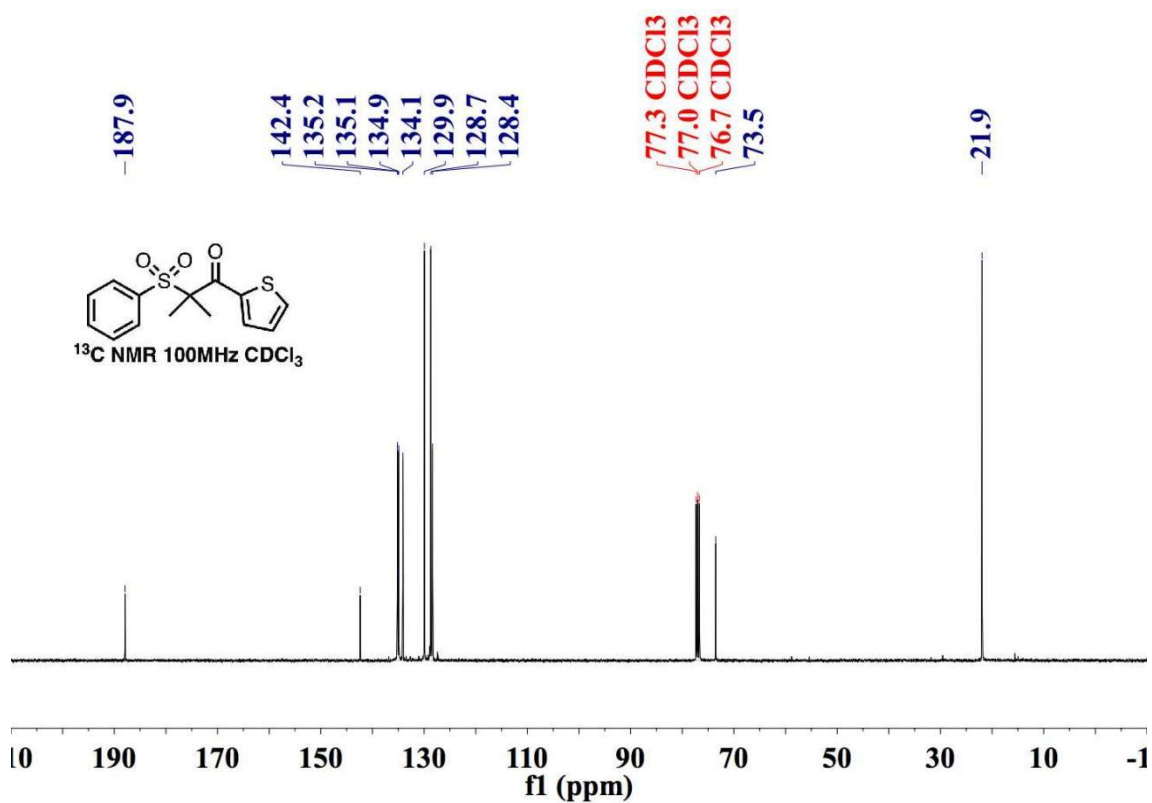

**2-Methyl-1-(naphthalen-1-yl)-2-(phenylsulfonyl)propan-1-one (1ah):**

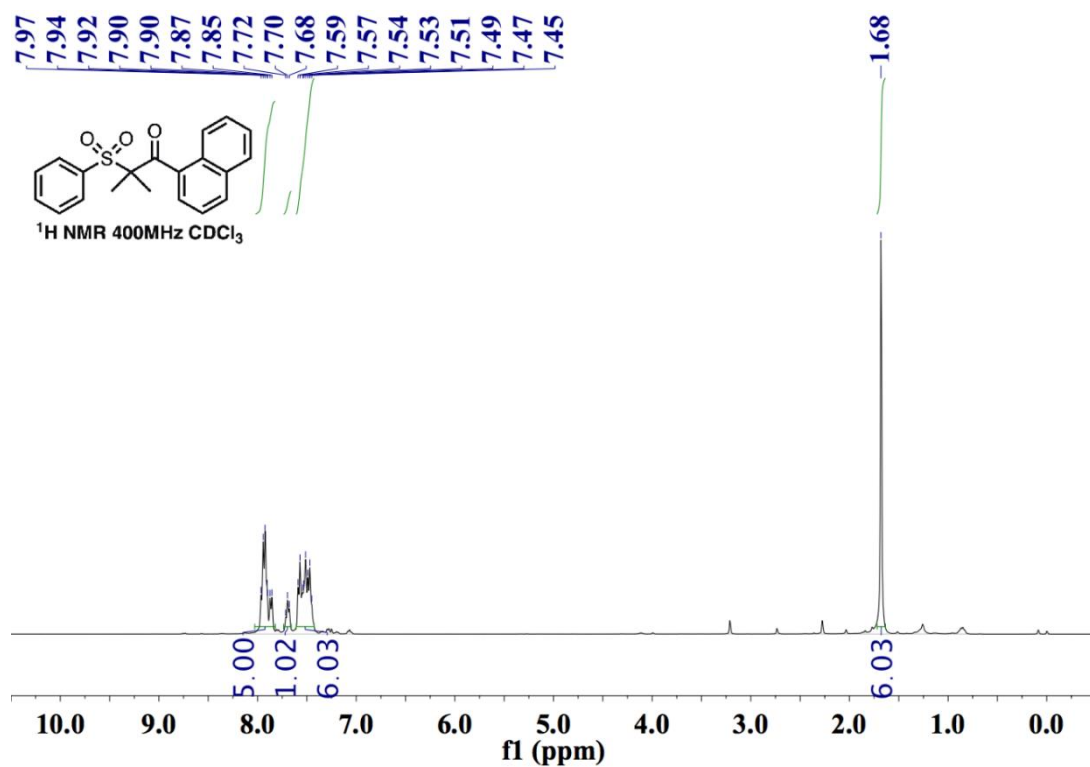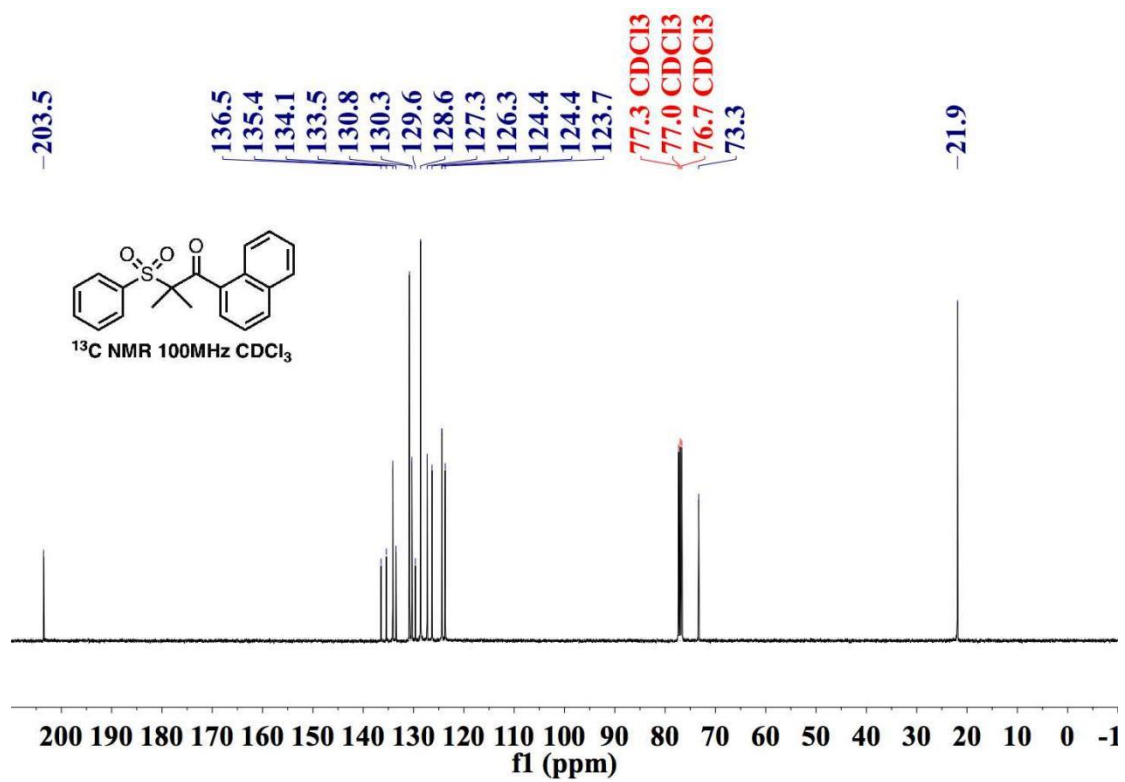

Phenyl(1-(phenylsulfonyl)cyclopentyl)methanone (1ai):

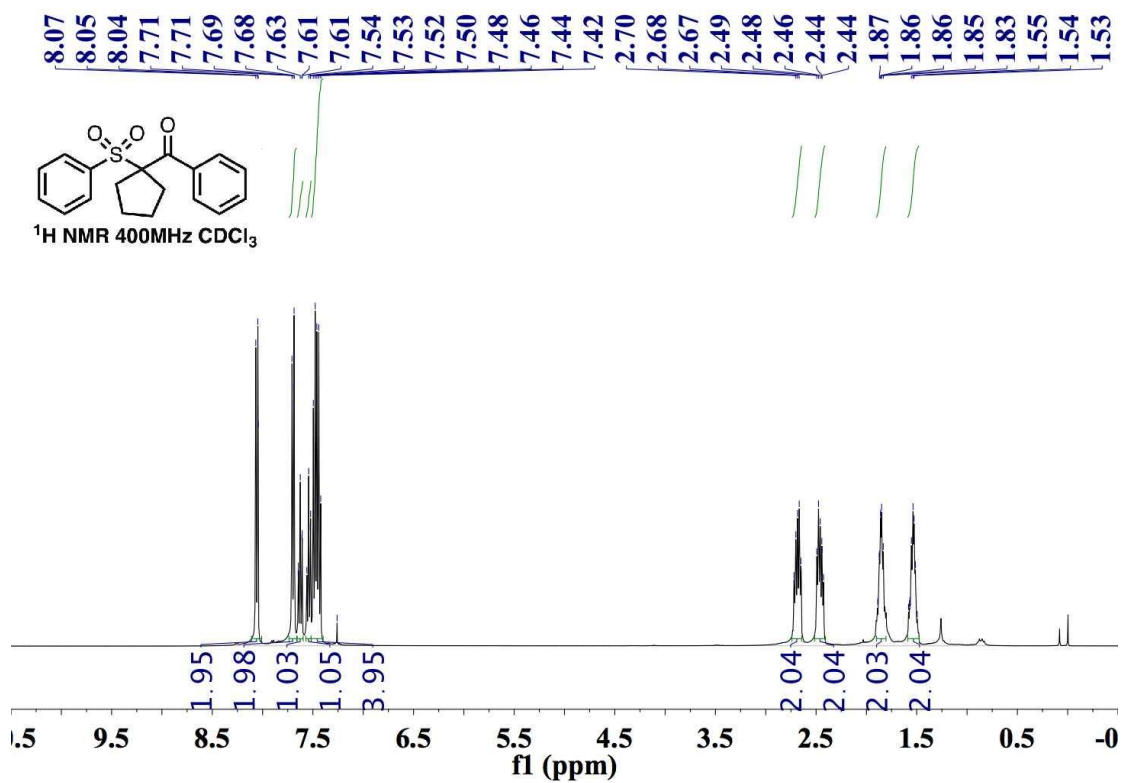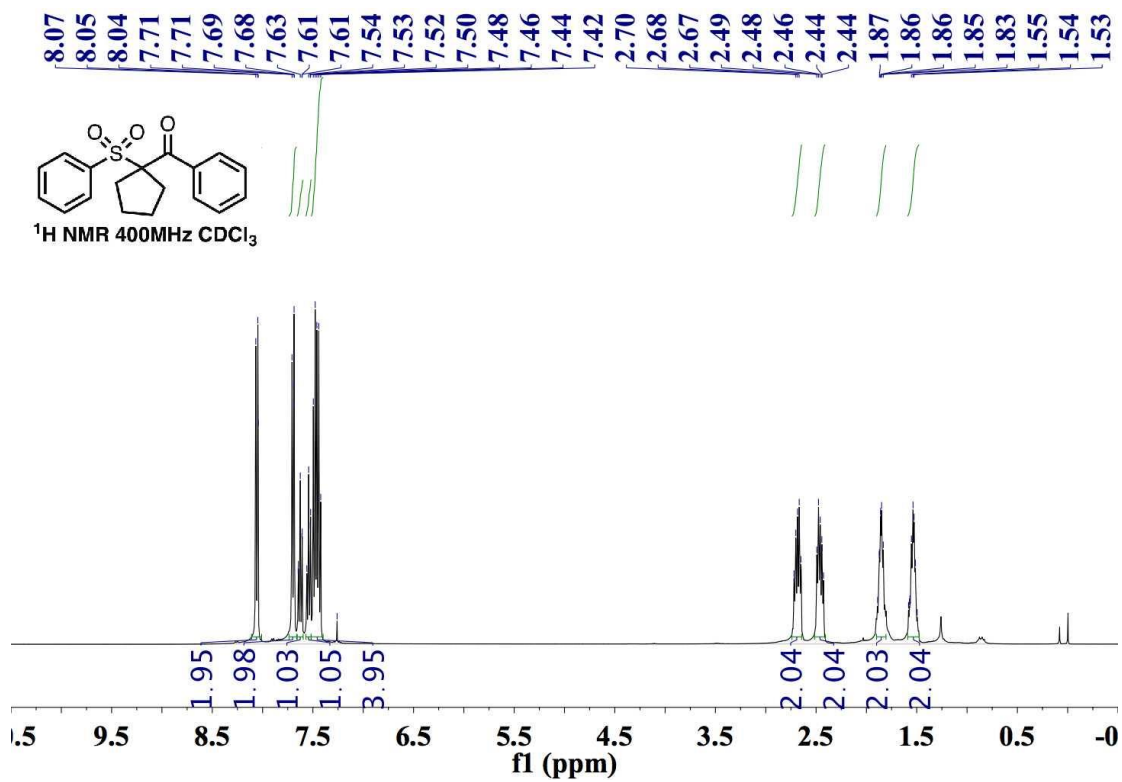

**1-(2-Bromophenyl)-2-methyl-2-(phenylsulfonyl)propan-1-ol (2a):**

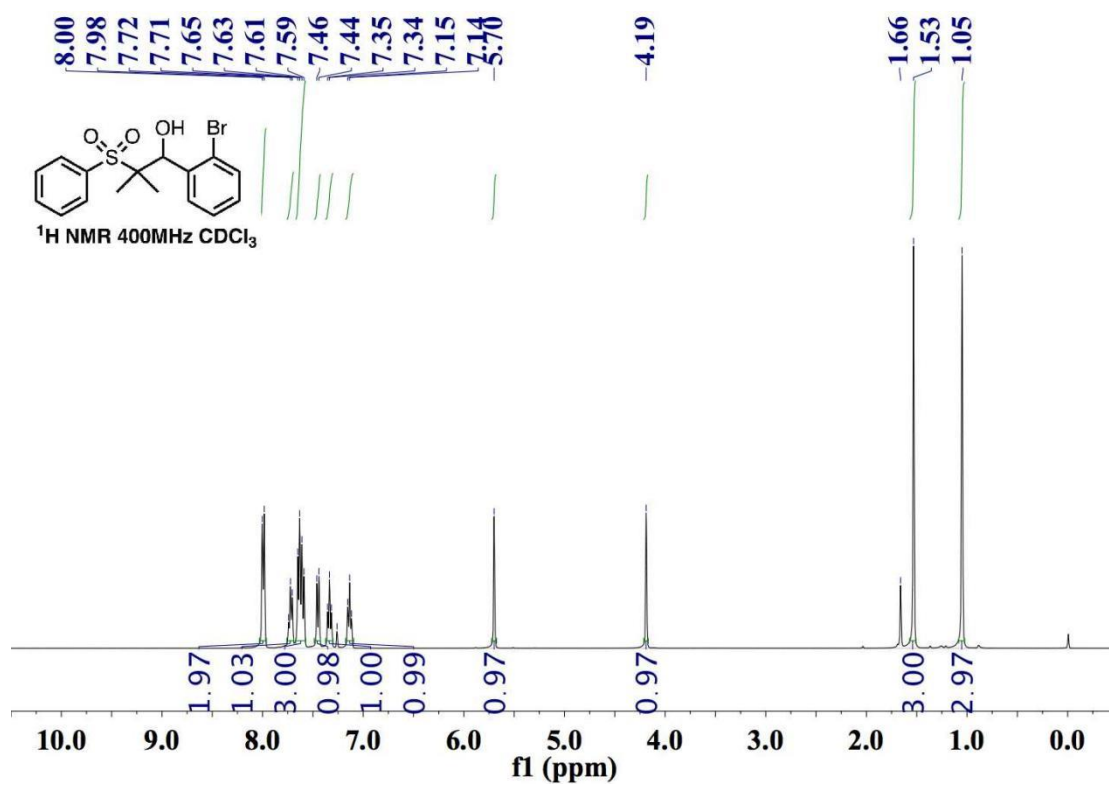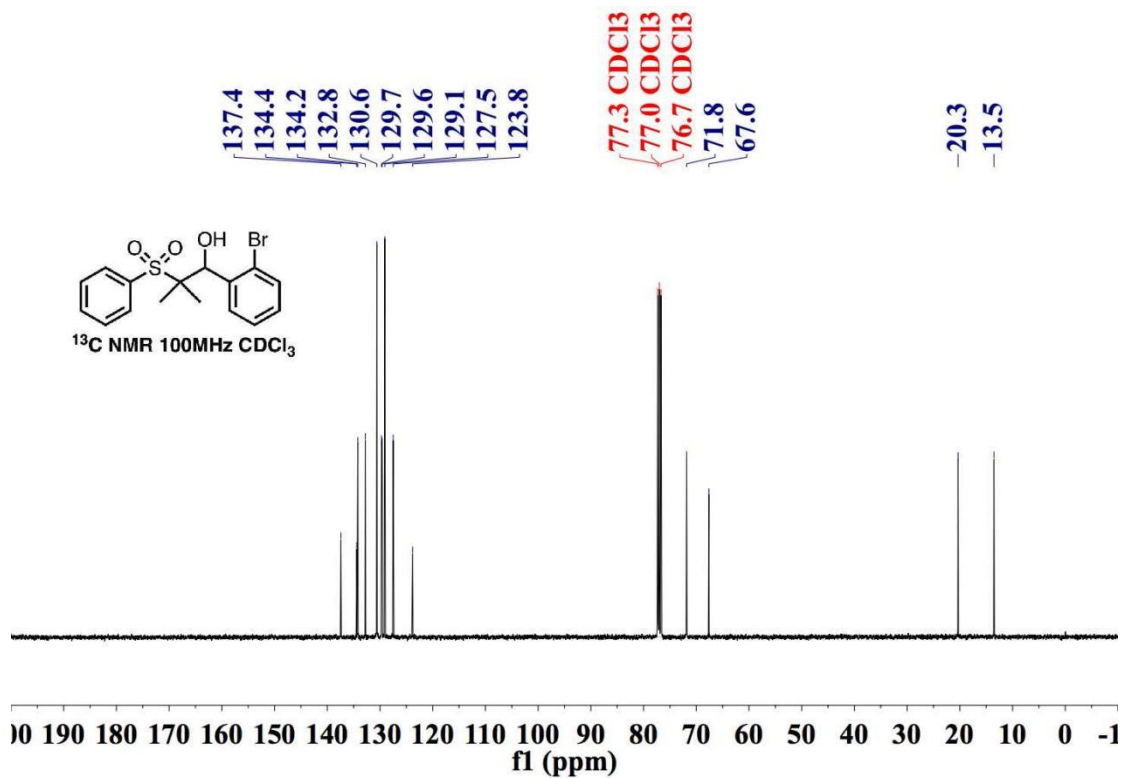

**1-(2-Bromophenyl)-2-methyl-2-tosylpropan-1-ol (2b):**

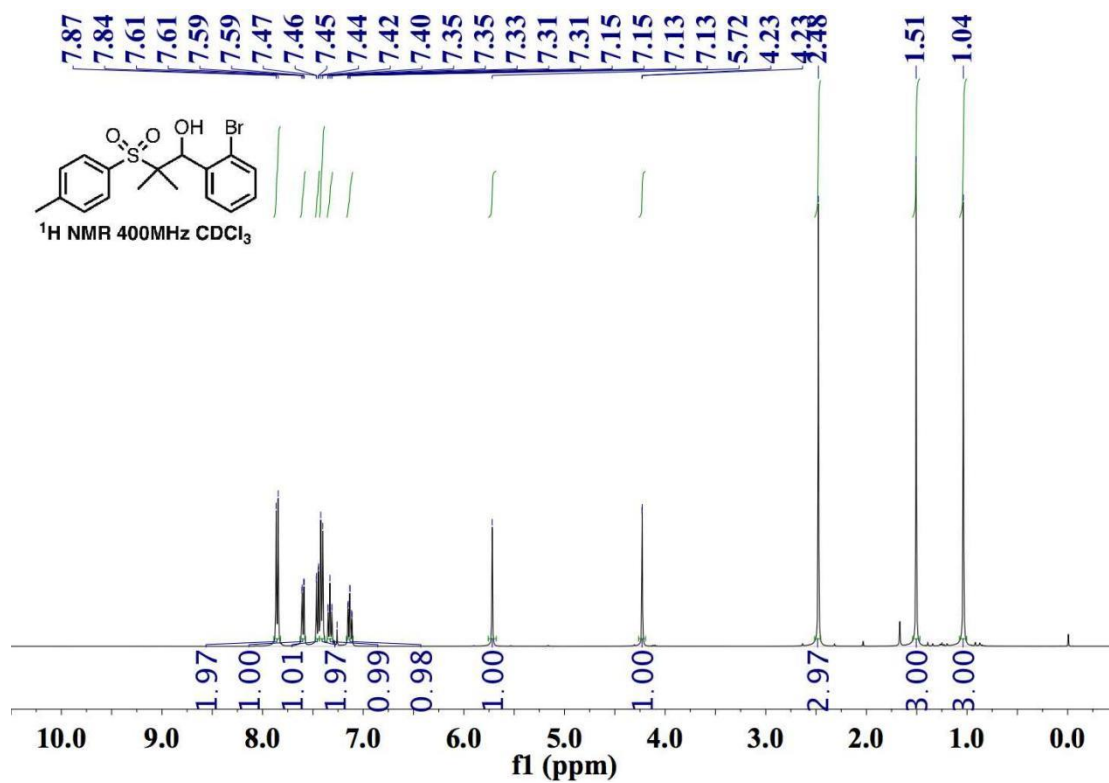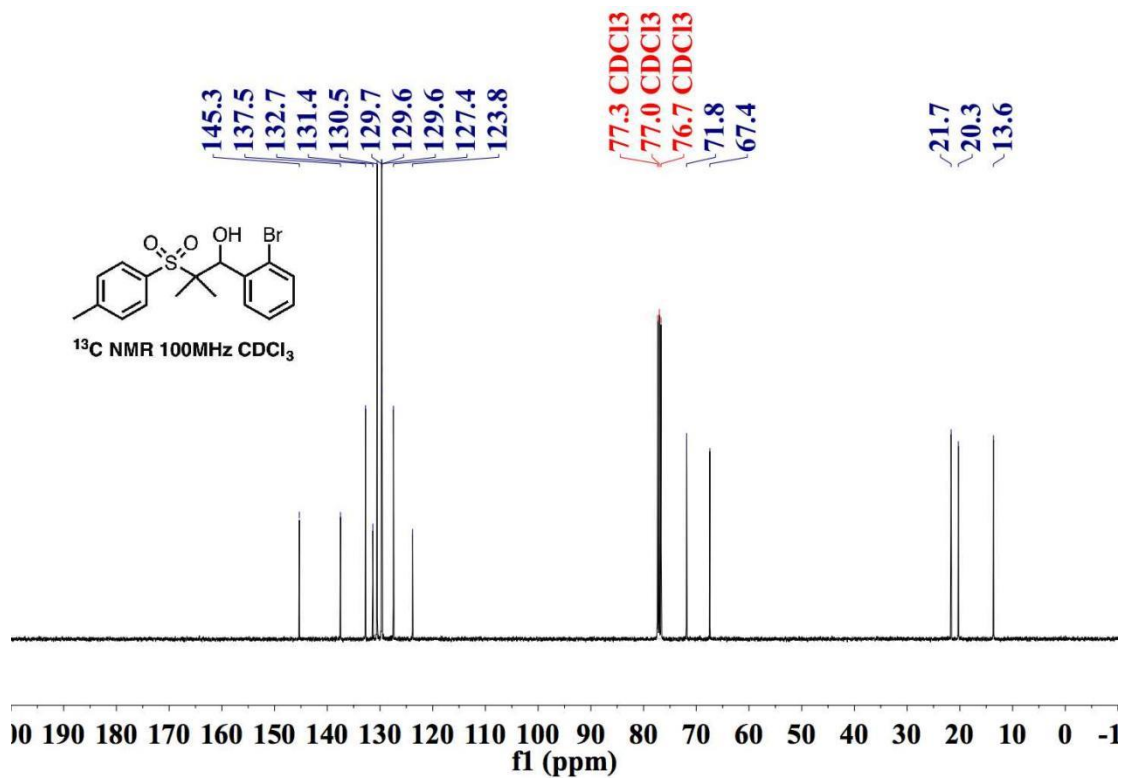

**1-(2-Bromophenyl)-2-((4-(tert-butyl)phenyl)sulfonyl)-2-methylpropan-1-ol (2c):**

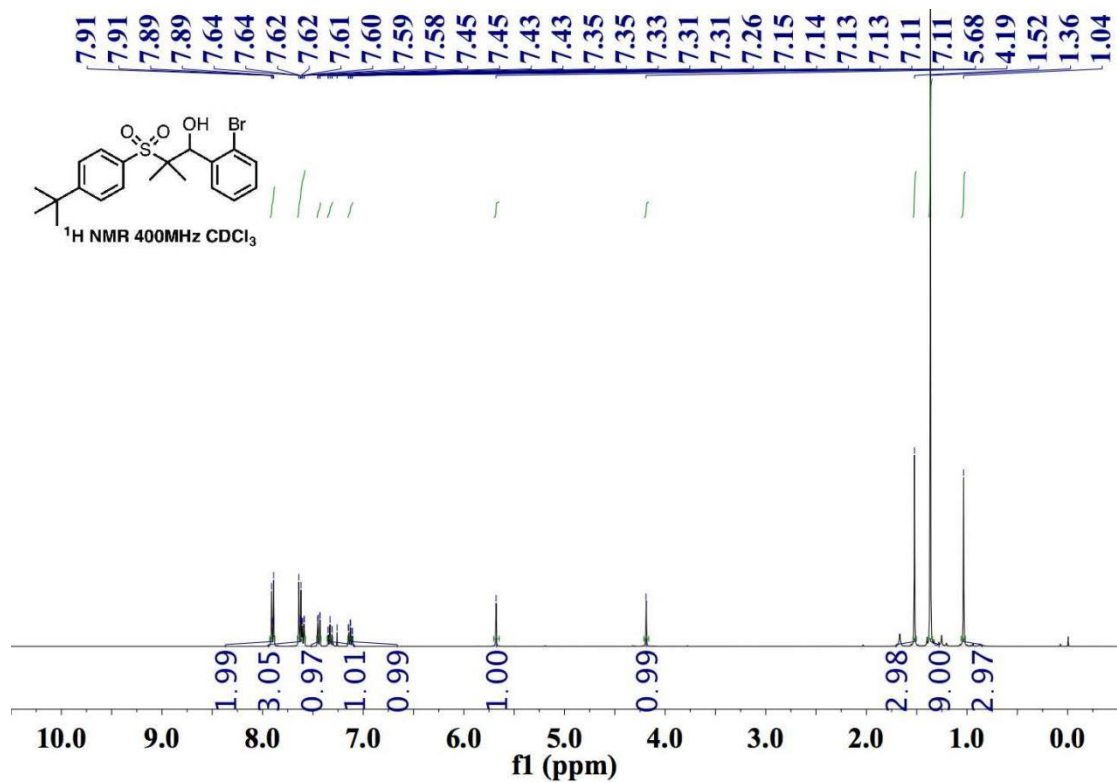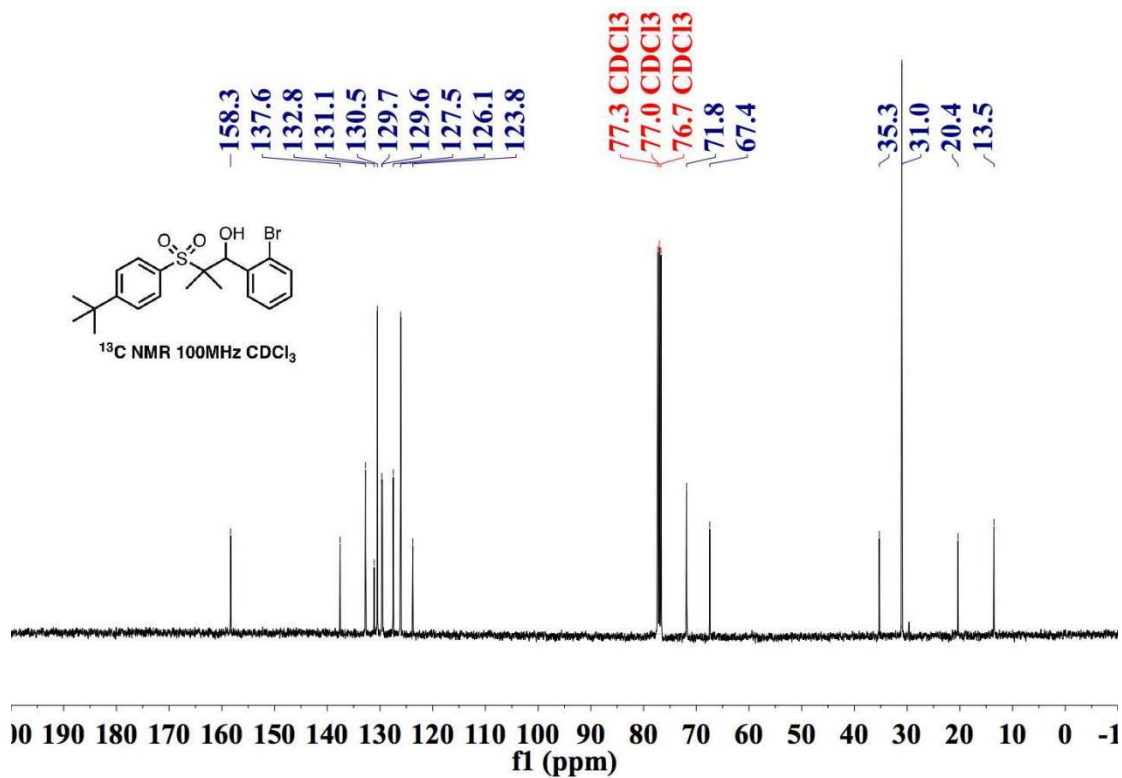

**1-(2-Bromophenyl)-2-((4-methoxyphenyl)sulfonyl)-2-methylpropan-1-ol (2d):**

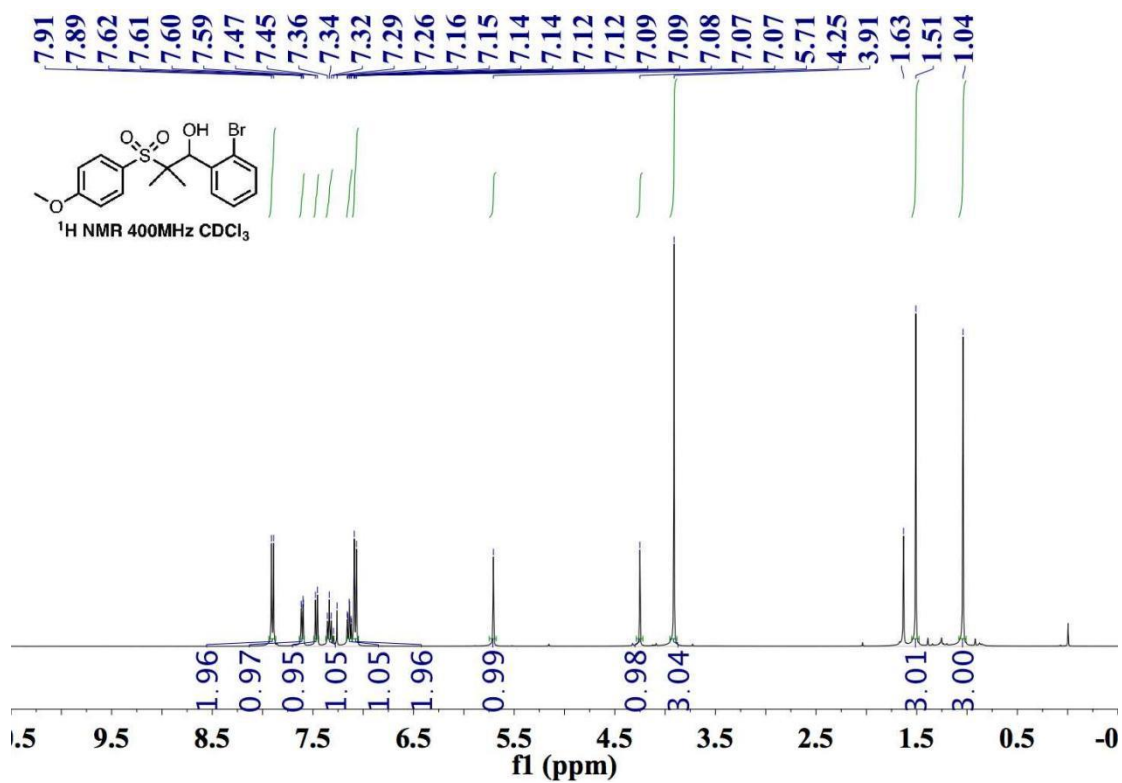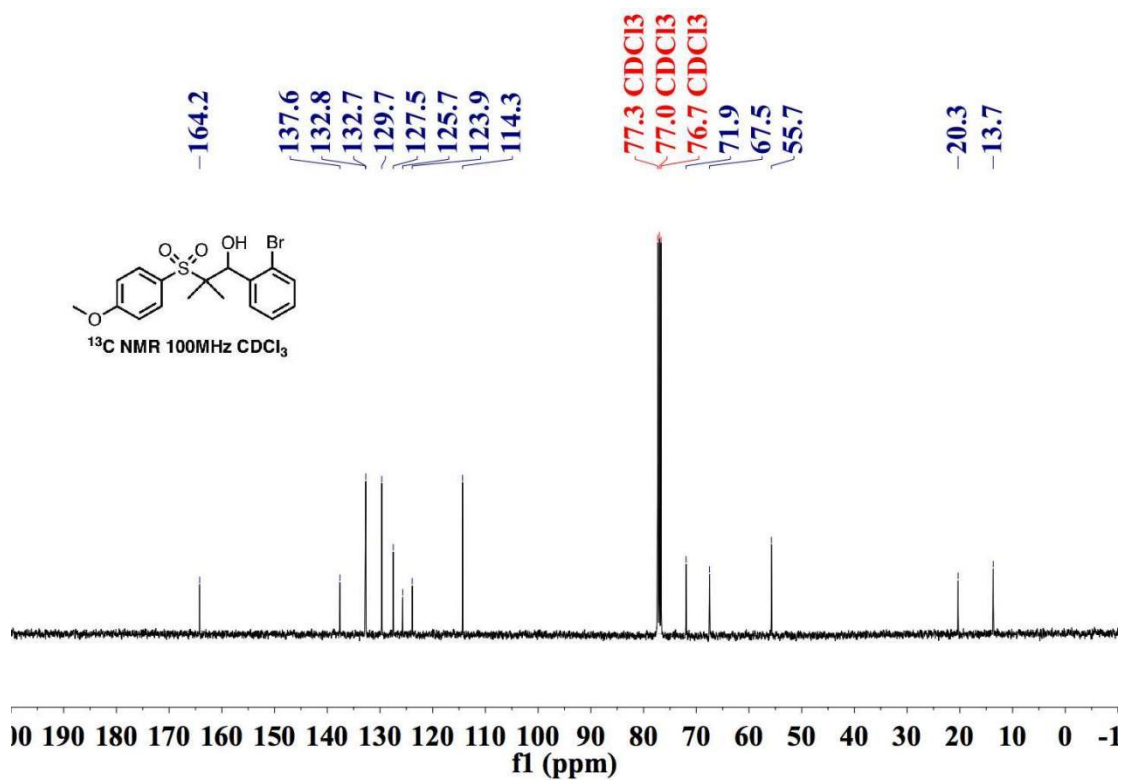

**1-(2-Bromophenyl)-2-((4-fluorophenyl)sulfonyl)-2-methylpropan-1-ol (2e):**

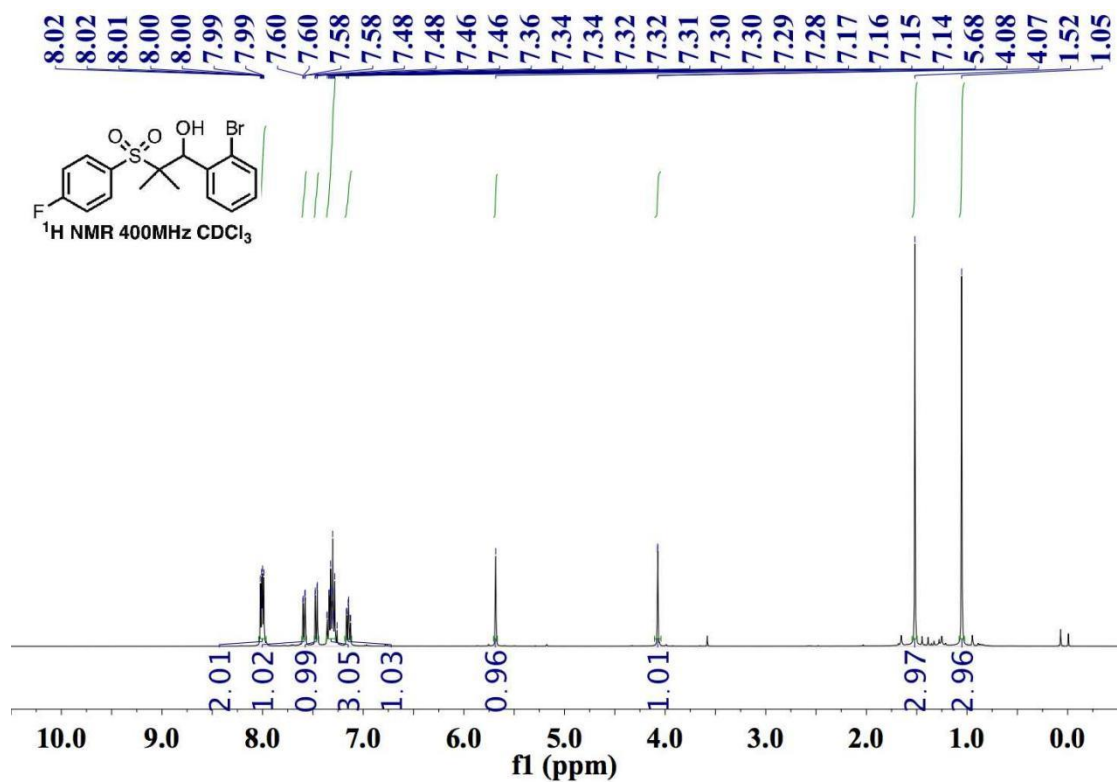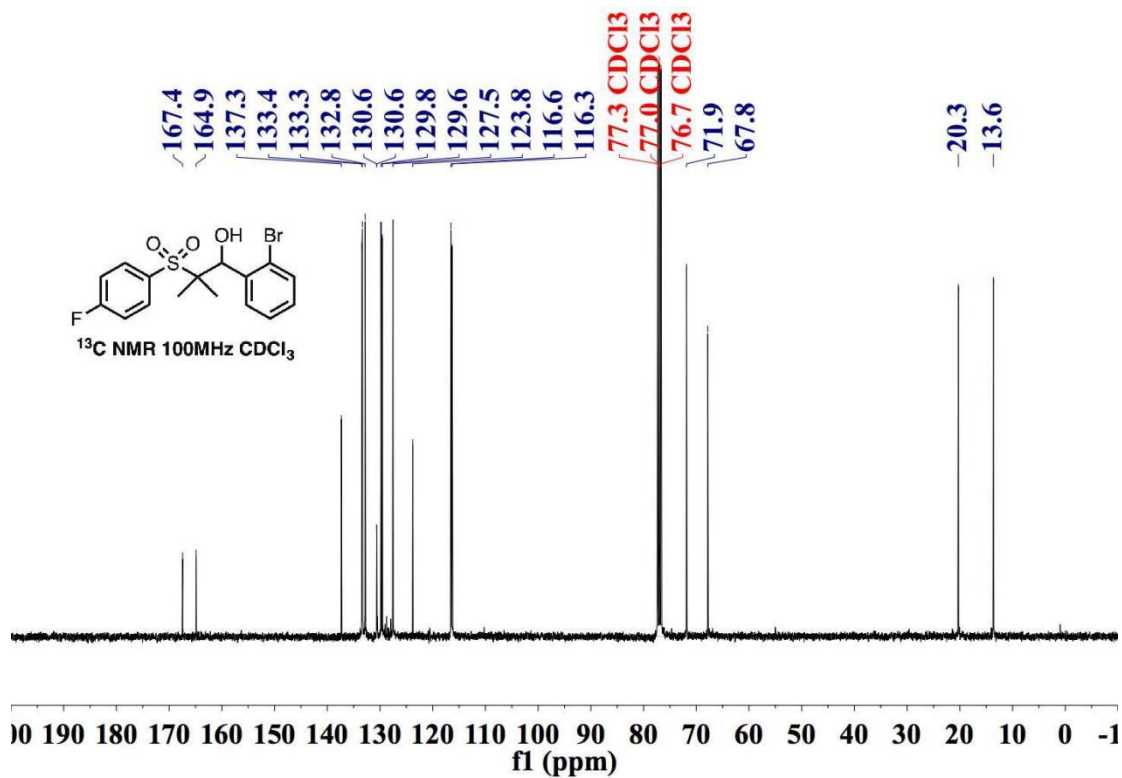



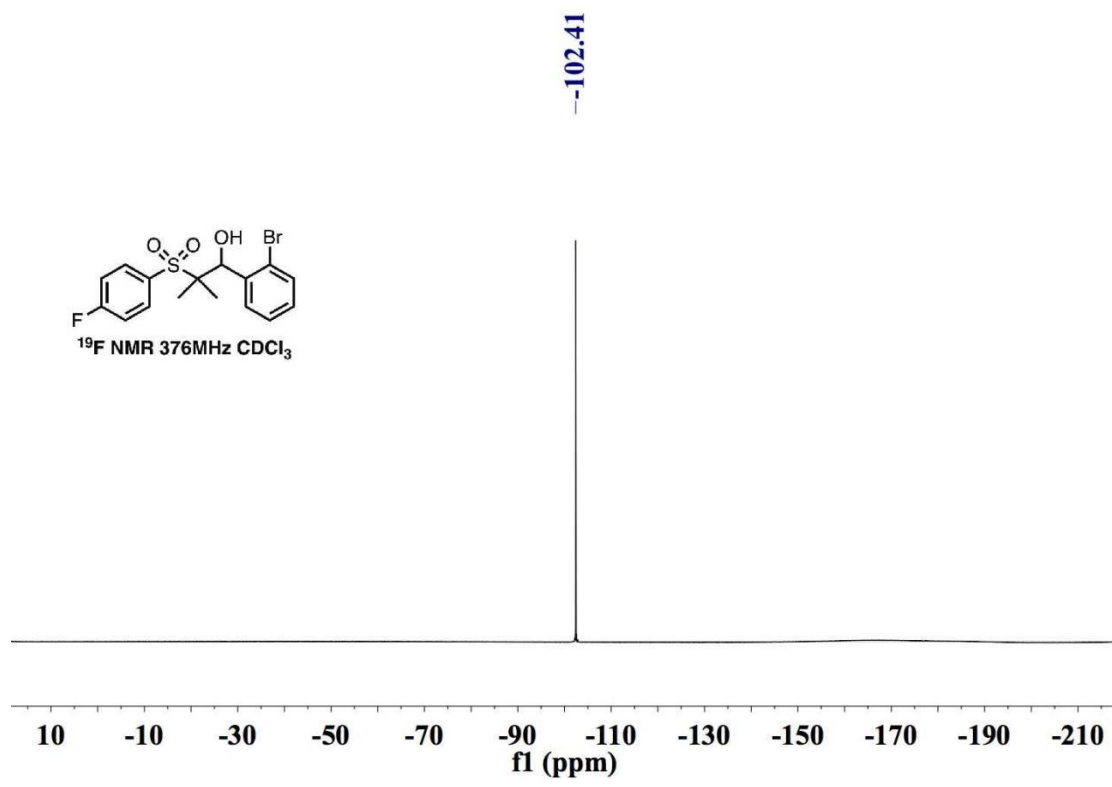

**1-(2-Bromophenyl)-2-methyl-2-((4-(trifluoromethyl)phenyl)sulfonyl)propan-1-ol**

**(2f):**

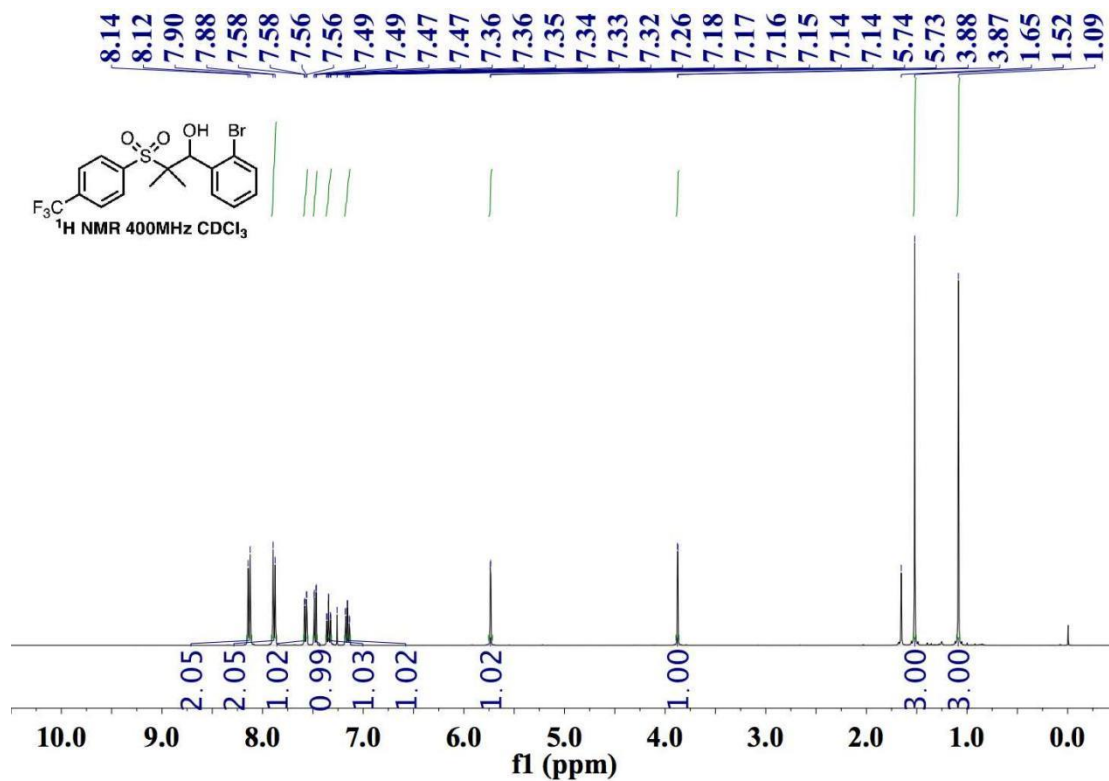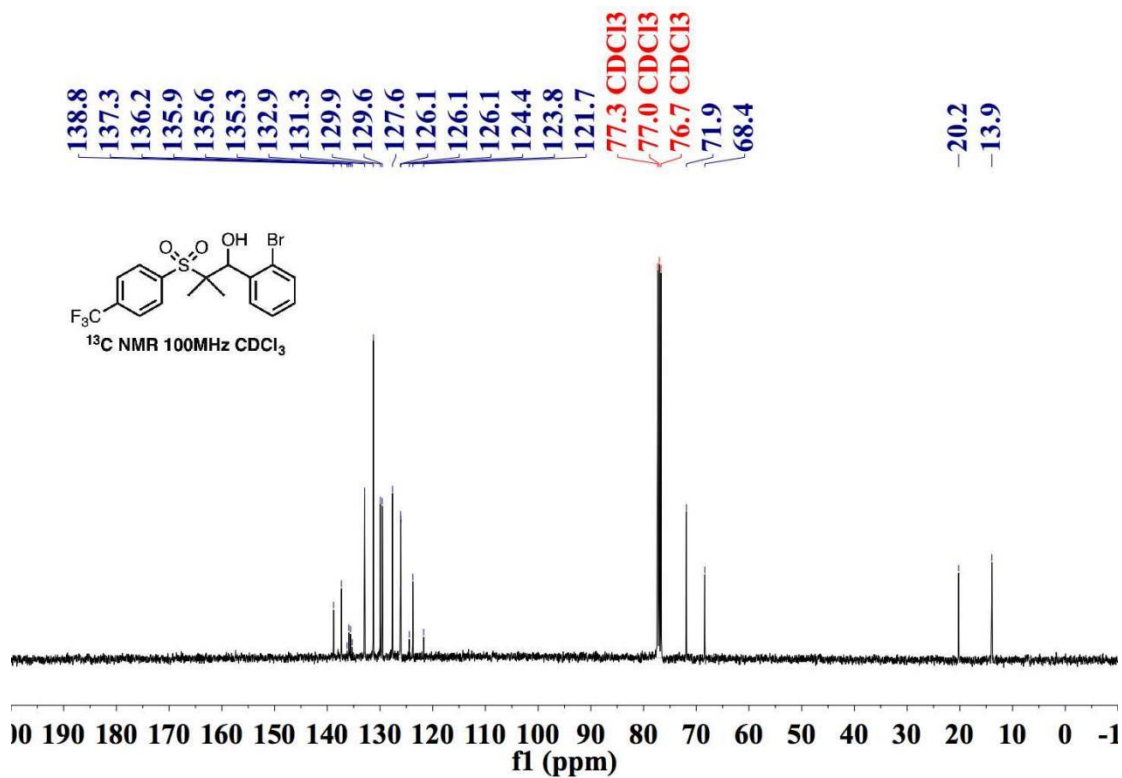

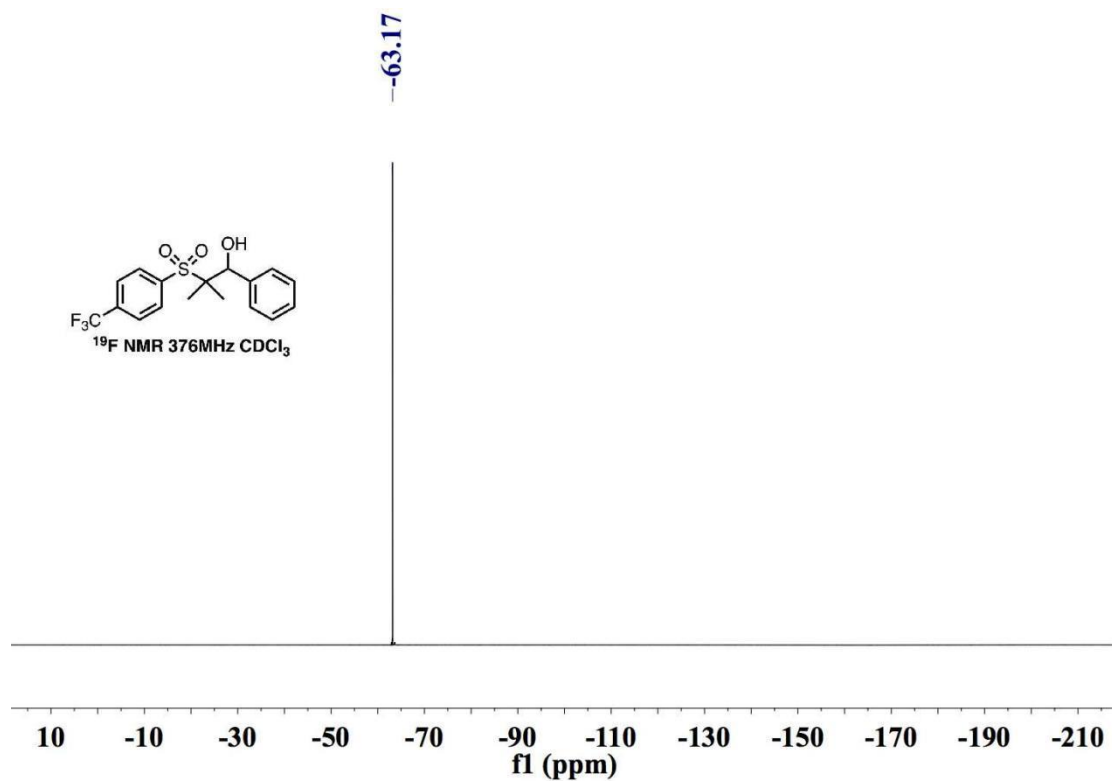

**1-(2-Bromophenyl)-2-methyl-2-((4-nitrophenyl)sulfonyl)-propan-1-ol (2g):**

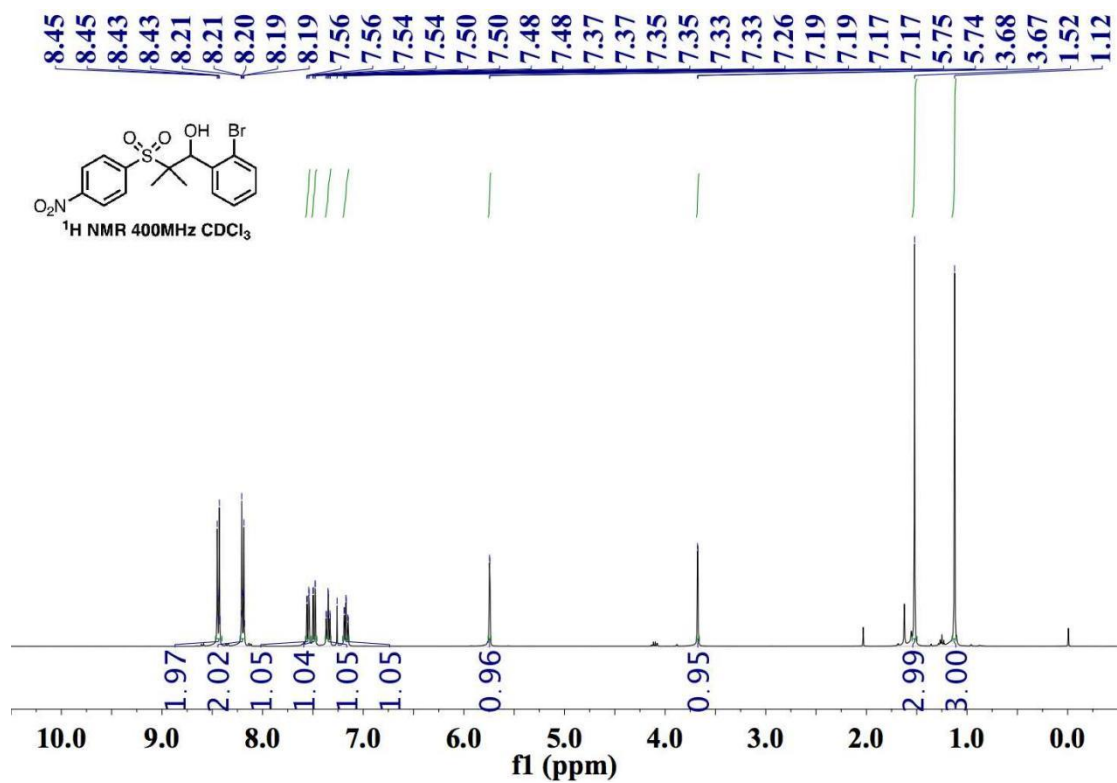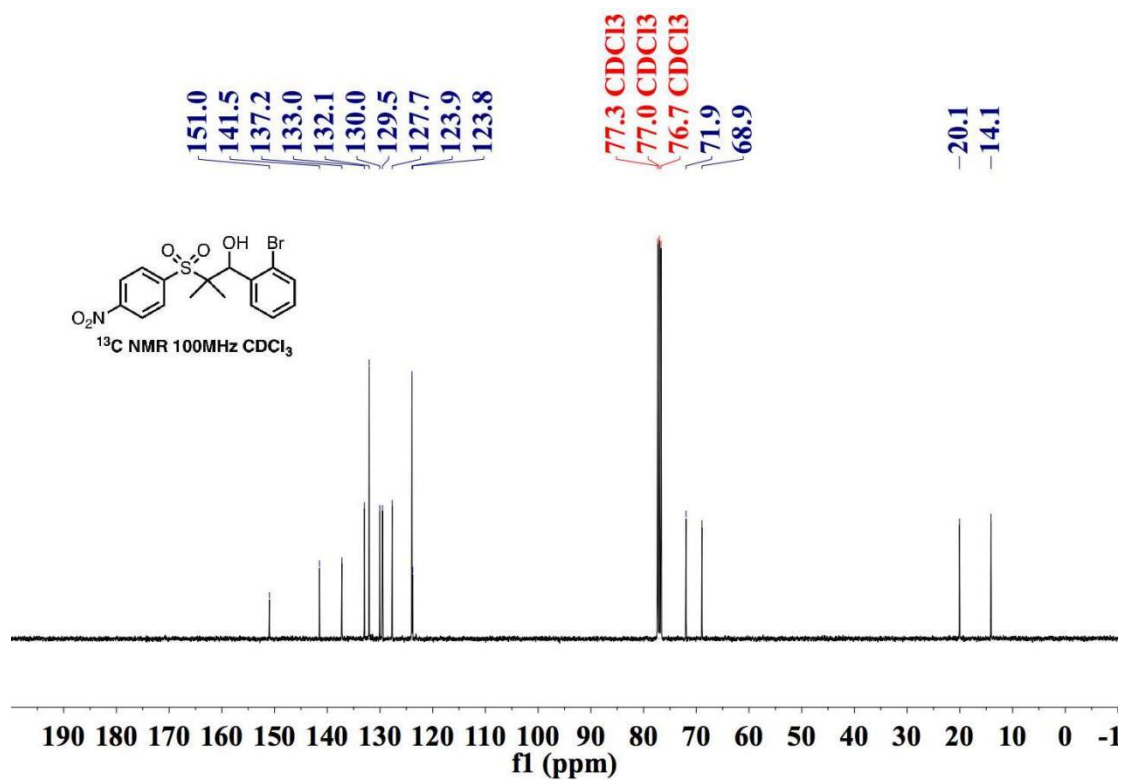

**1-(2-Bromophenyl)-2-((2-bromophenyl)sulfonyl)-2-methylpropan-1-ol (2h):**

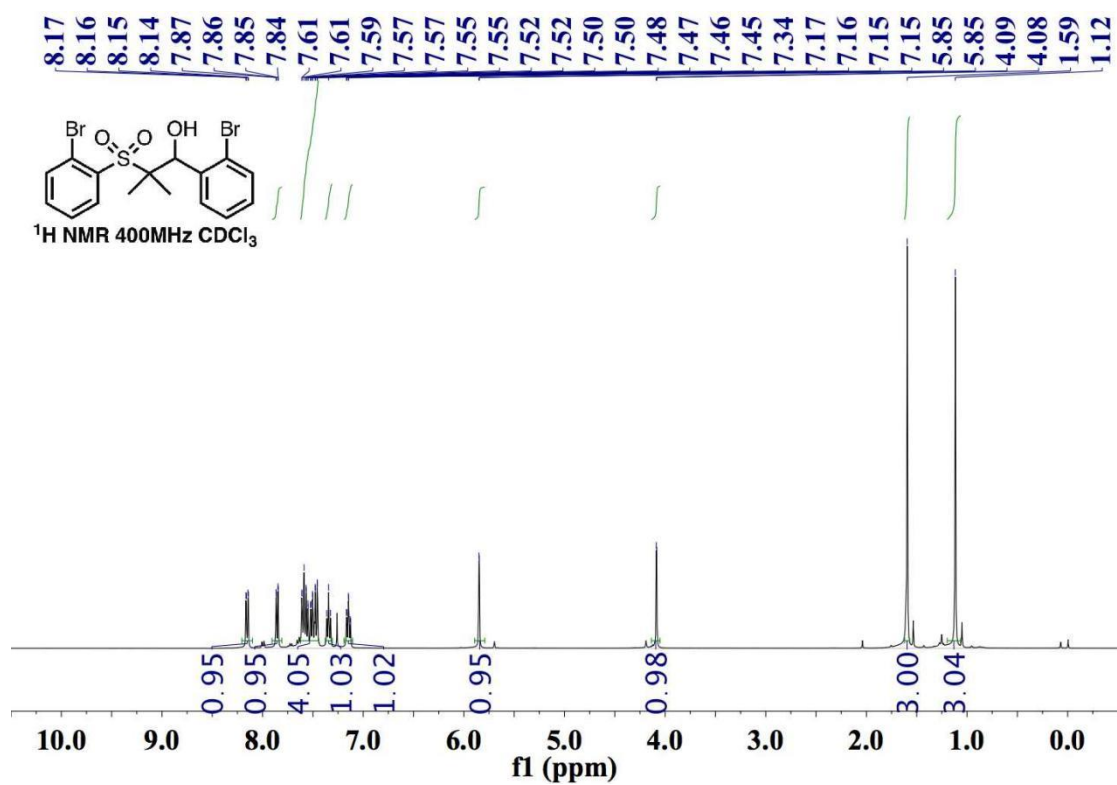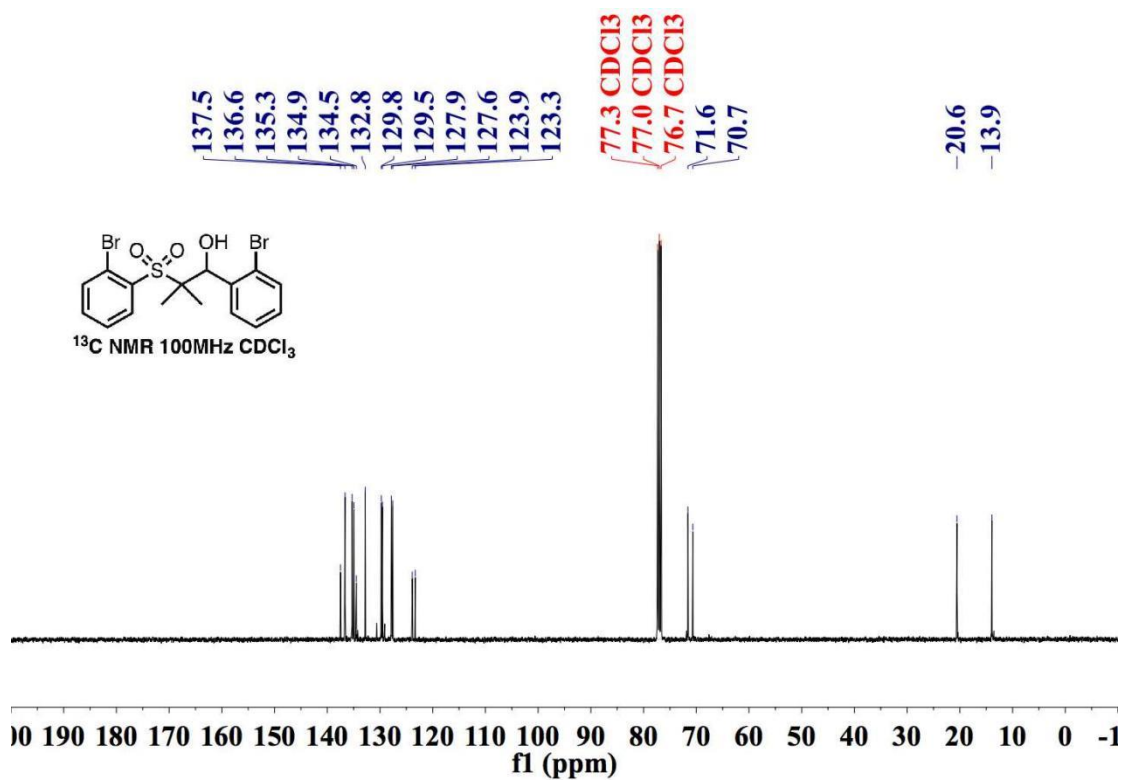

**1-(2-Bromophenyl)-2-((3-fluorophenyl)sulfonyl)-2-methylpropan-1-ol (2i):**

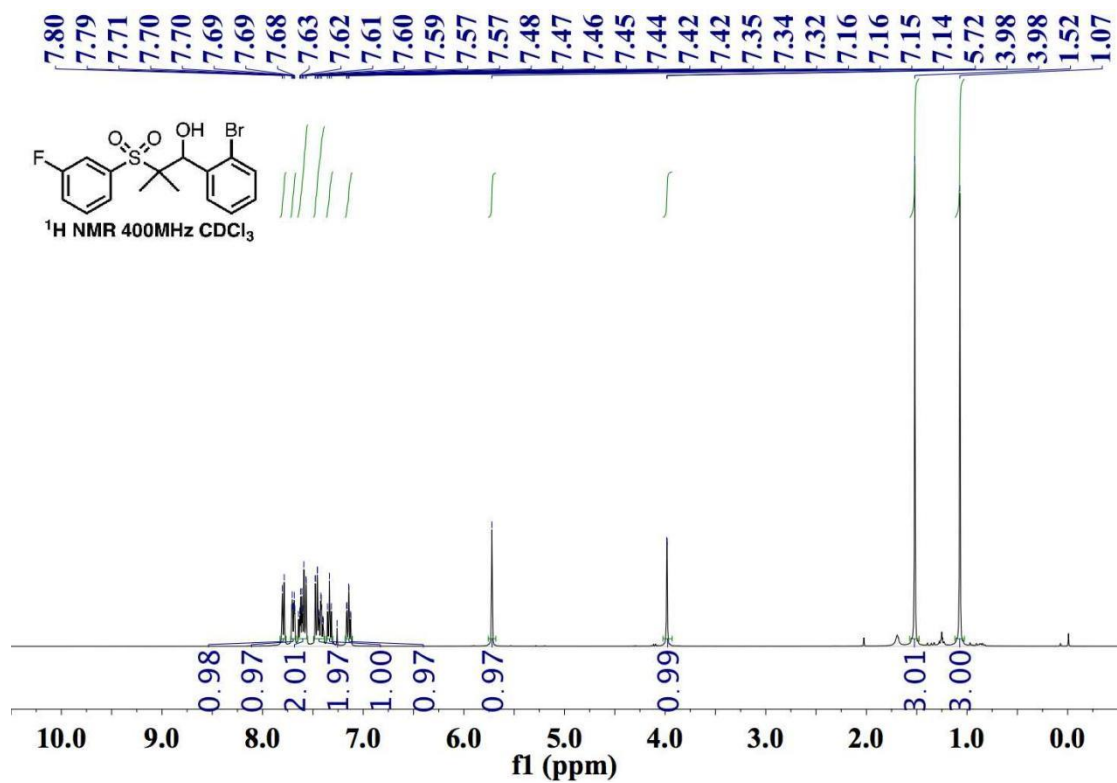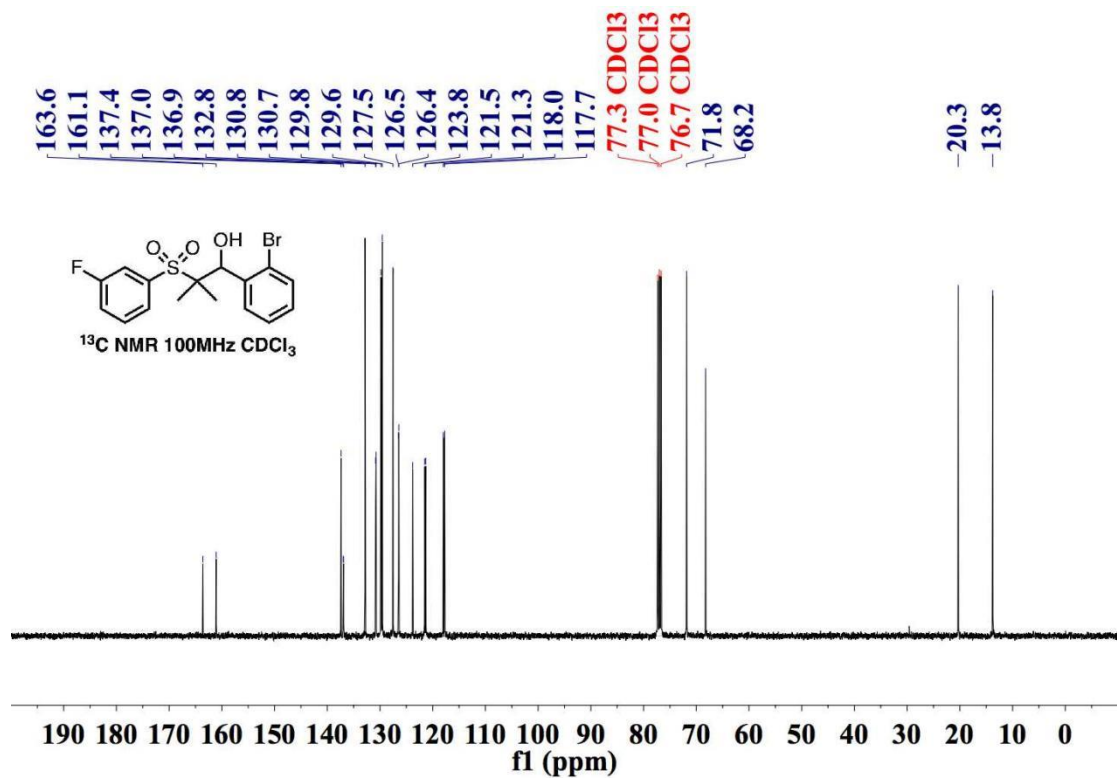

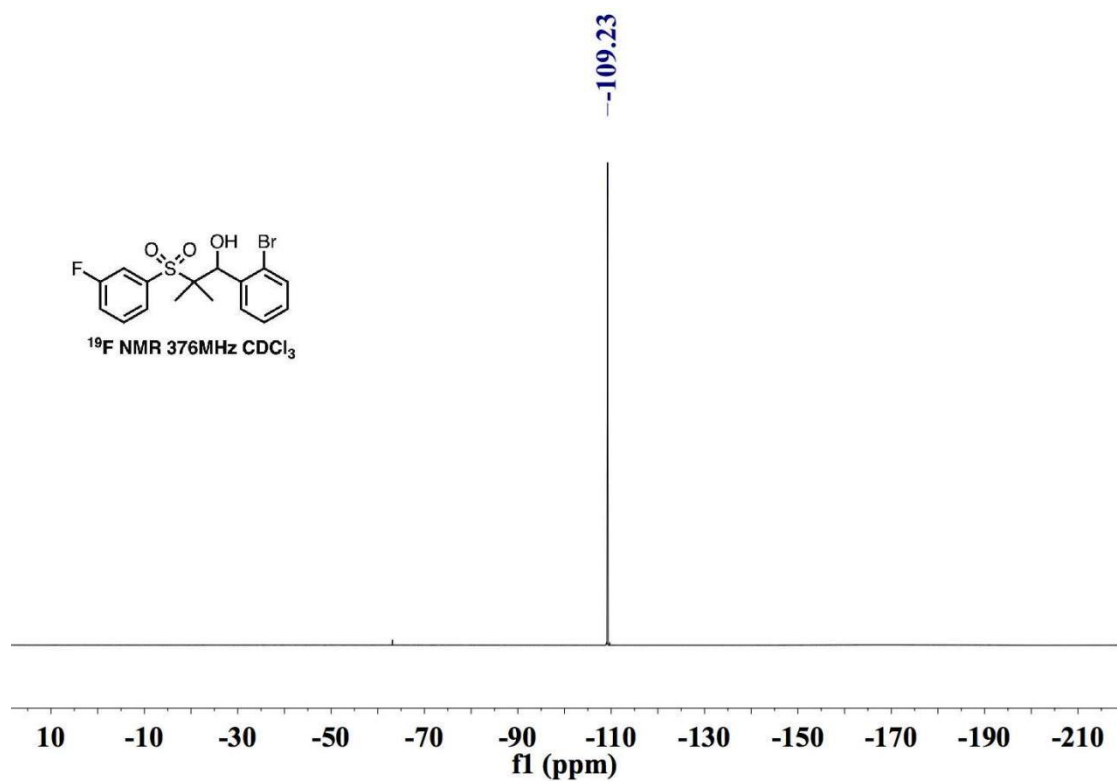

**1-(2-Bromophenyl)-2-methyl-2-(naphthalen-2-ylsulfonyl)propan-1-ol (2j):**

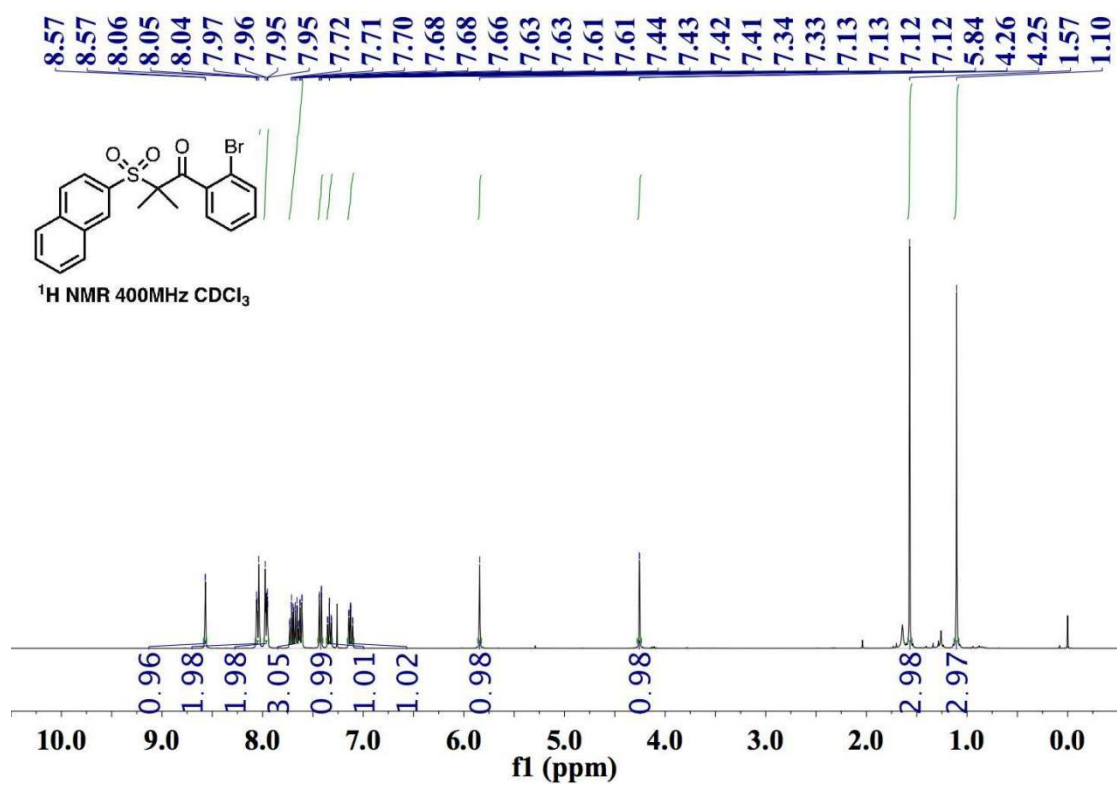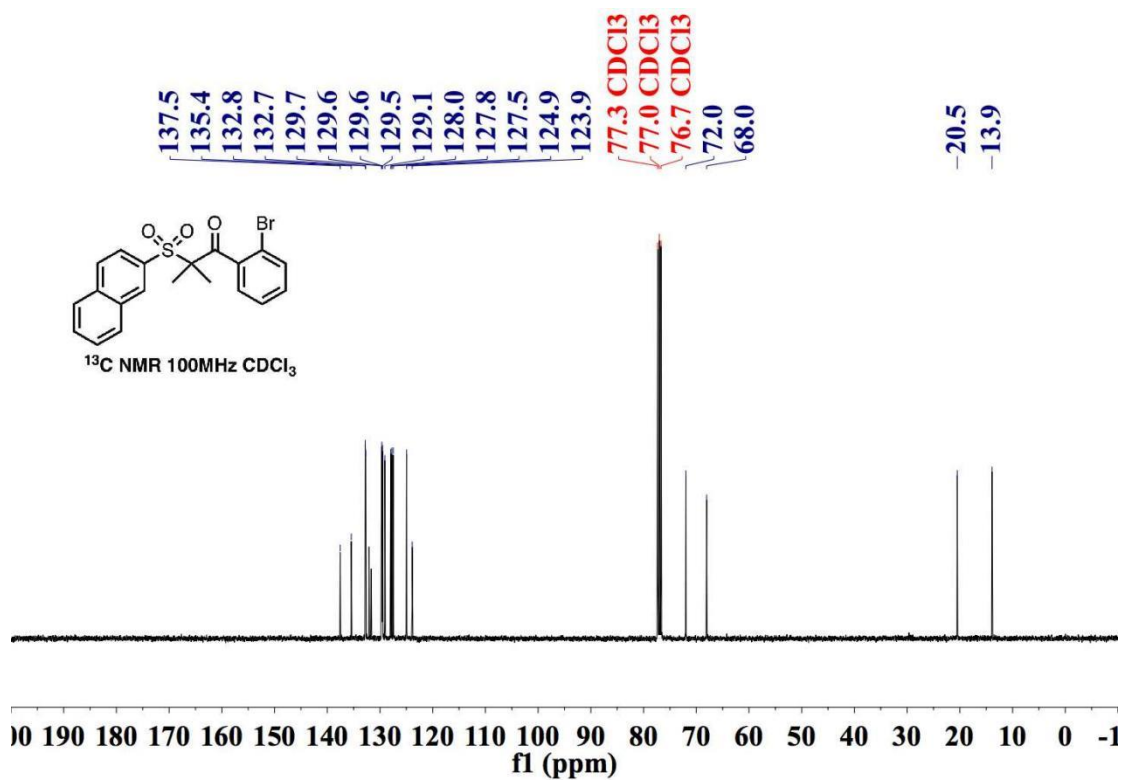



1-(2-Bromophenyl)-2-methyl-2-(pyridin-3-ylsulfonyl)propan-1-ol (2k):

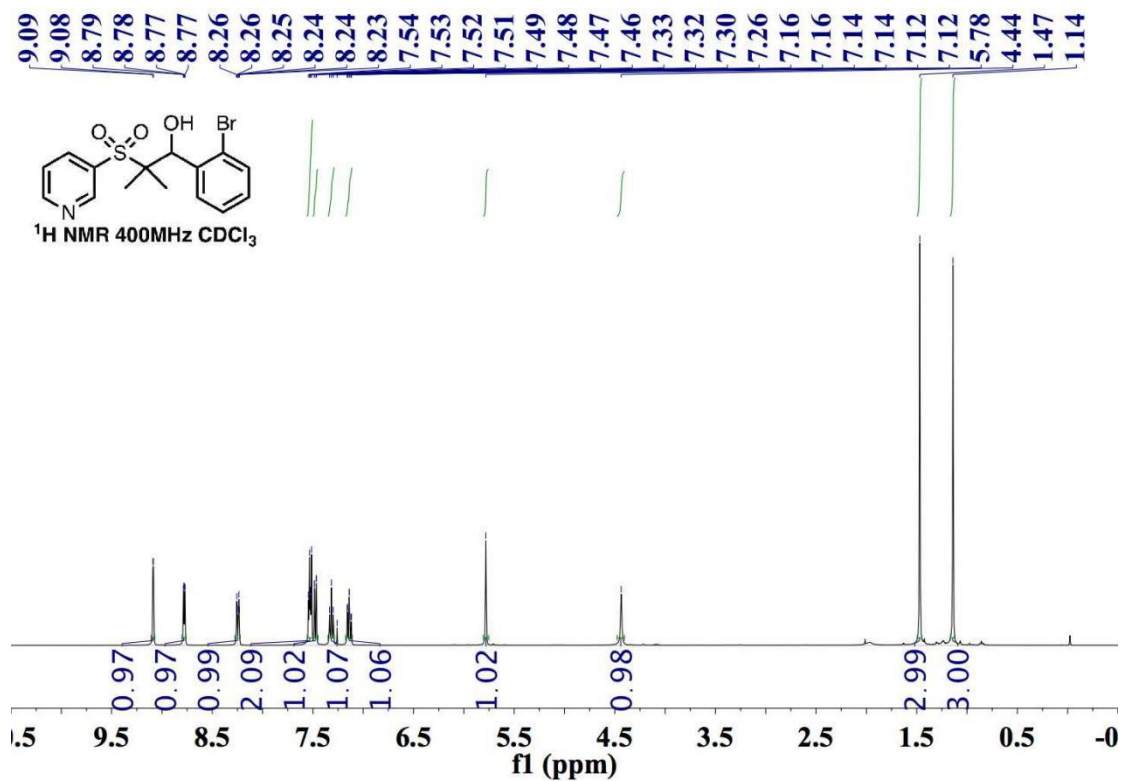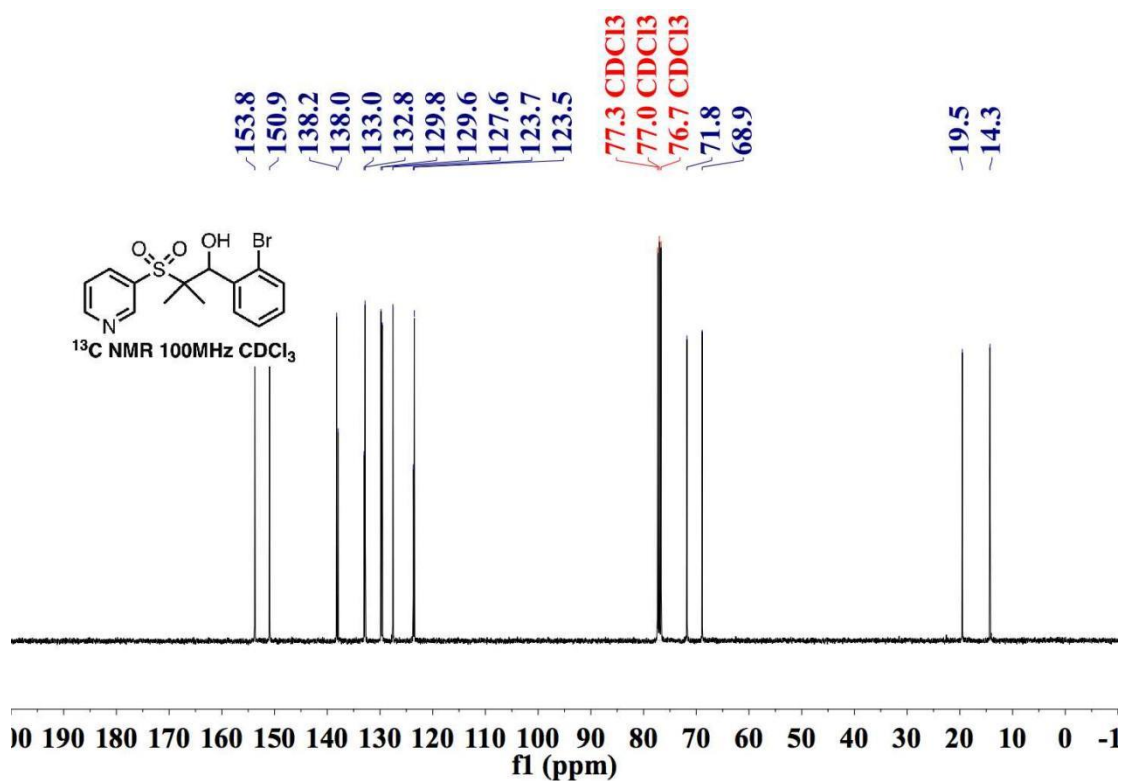

**1-(2-Bromophenyl)-2-methyl-2-(thiophen-2-ylsulfonyl)propan-1-ol (2l):**

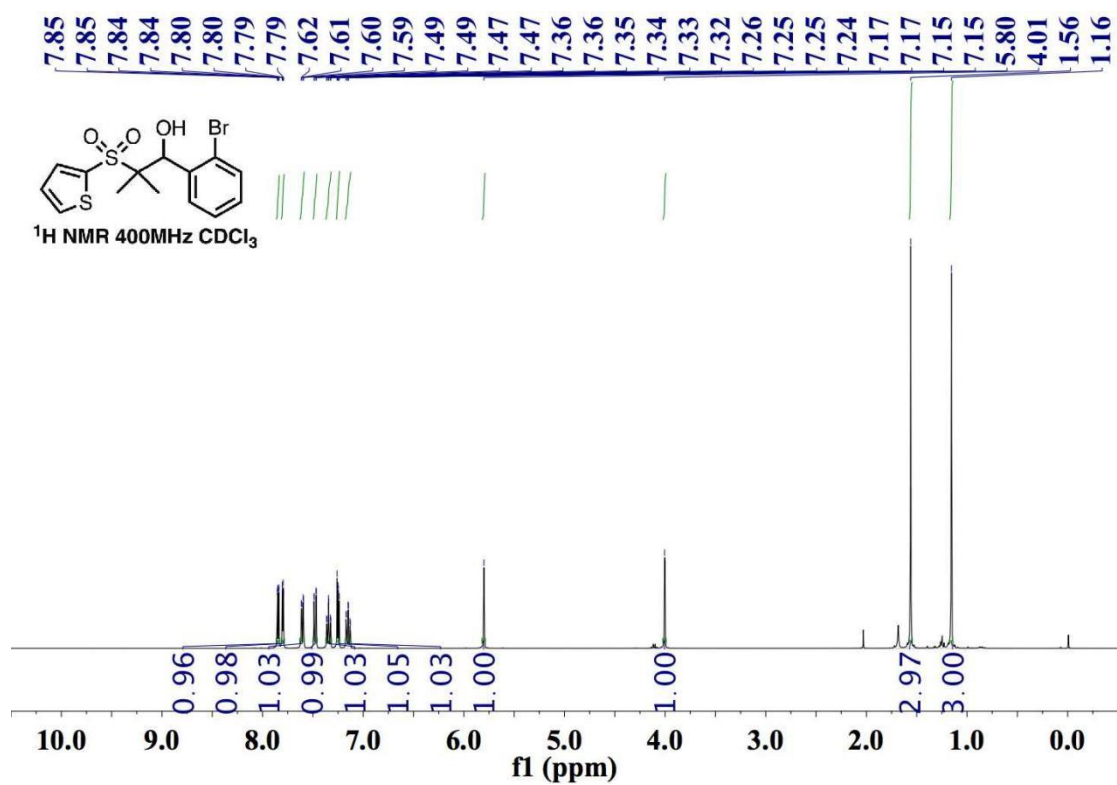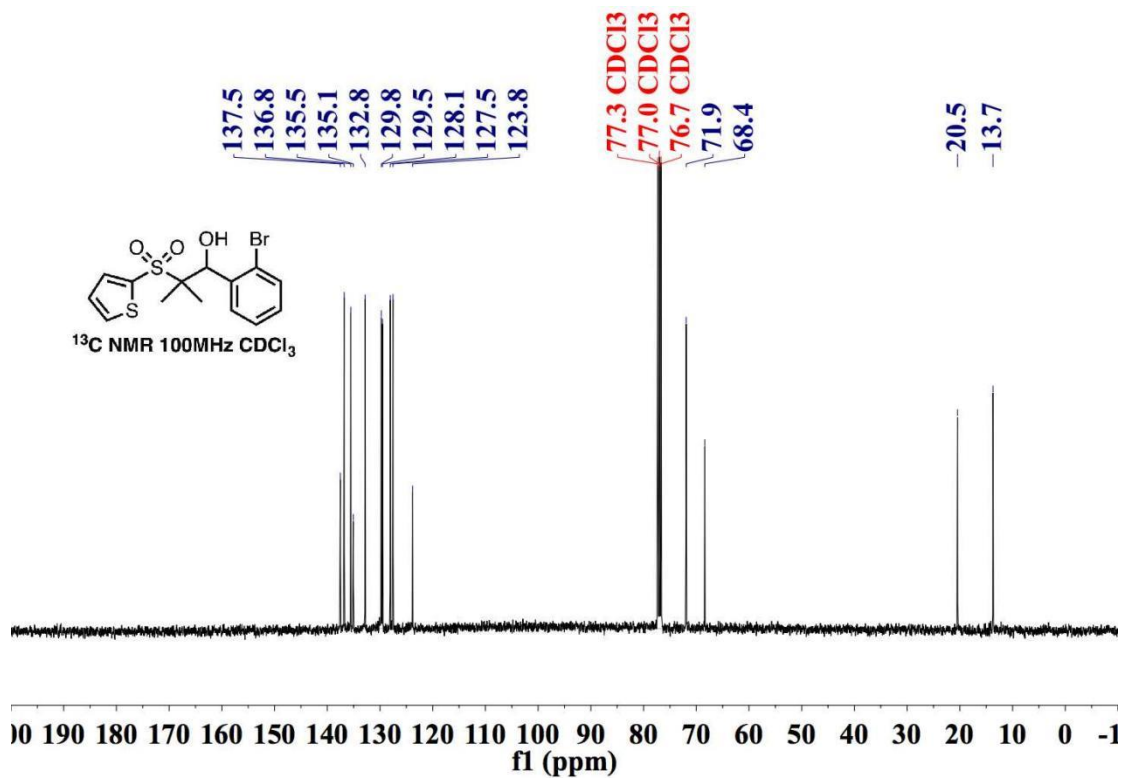

**1-(2-Bromophenyl)-2-methyl-2-(methylsulfonyl)propan-1-ol (2m):**

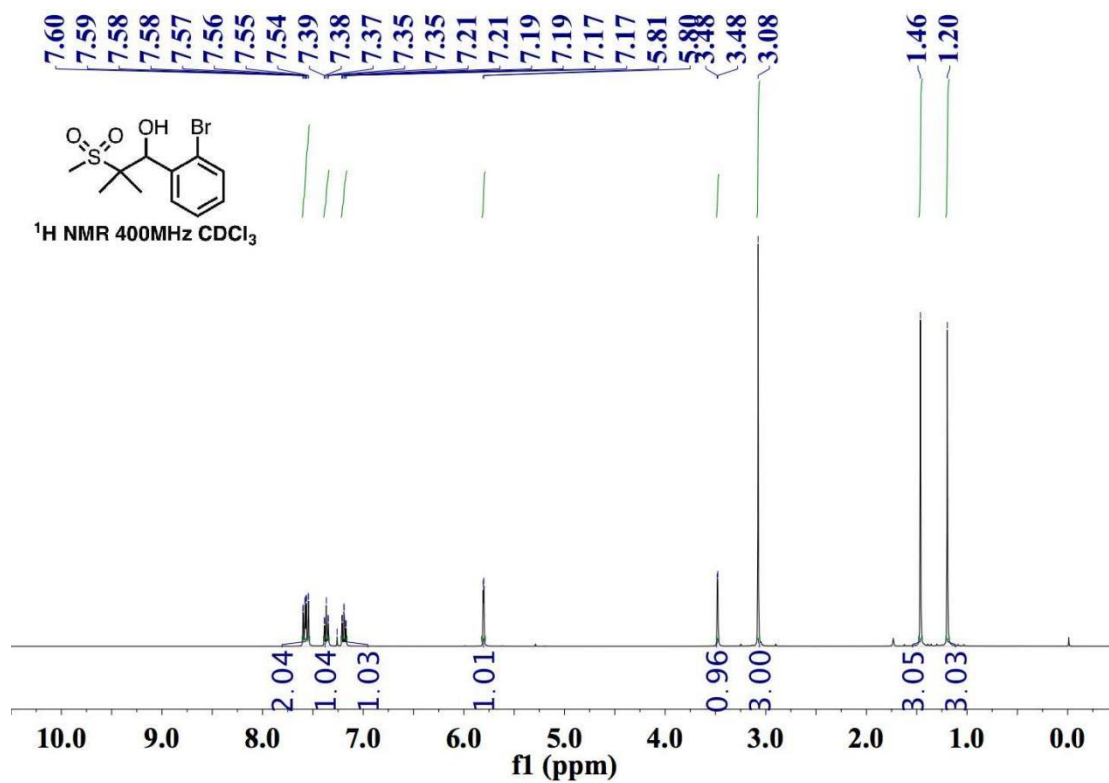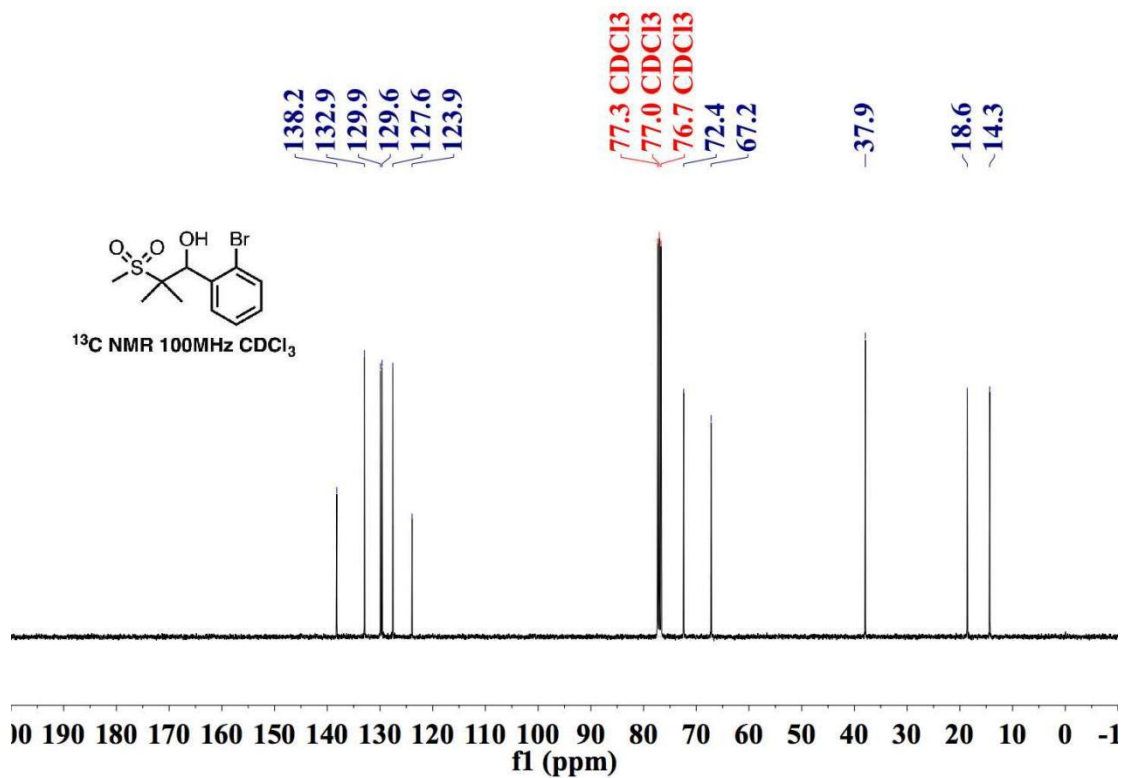

**(2-Bromophenyl)(1-(phenylsulfonyl)cyclopentyl)methanol (2n):**

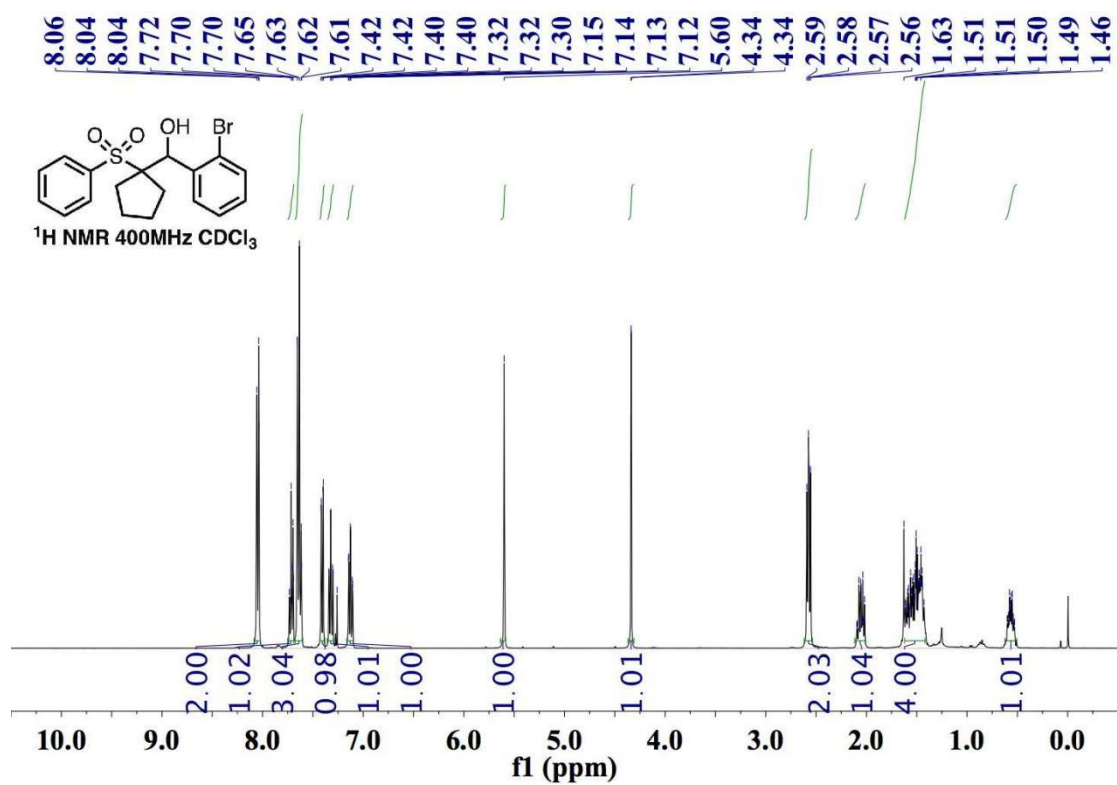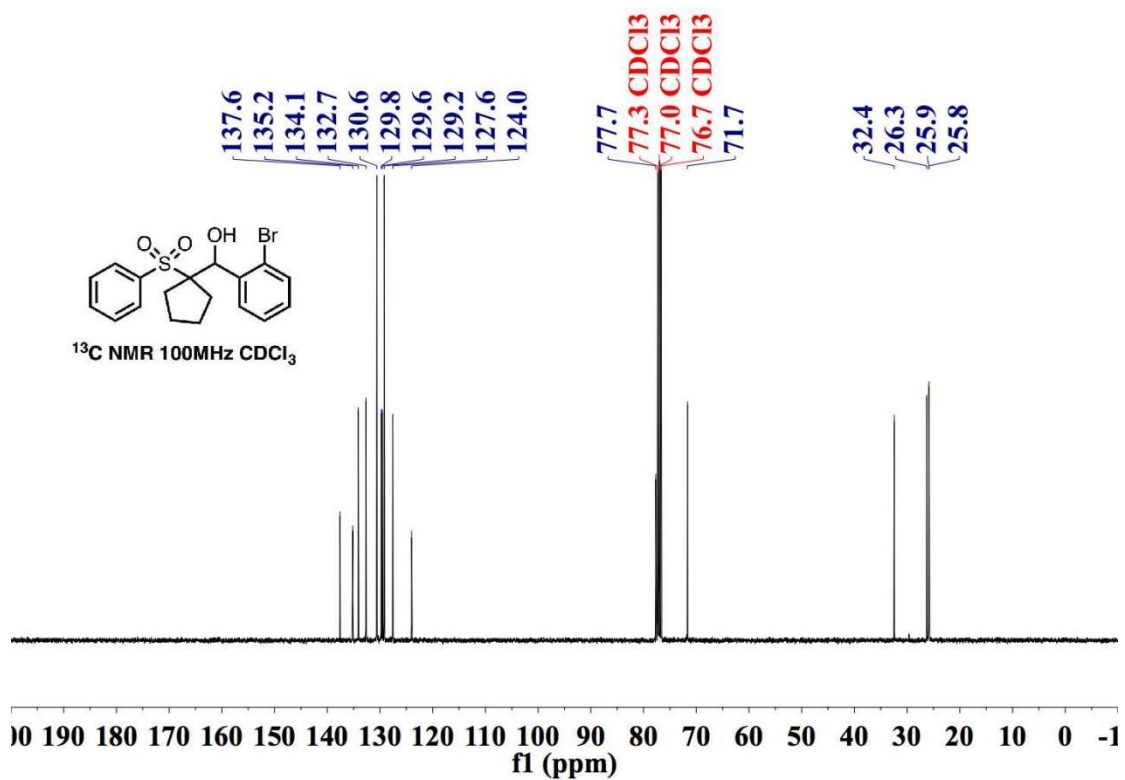

**1-(2-Bromophenyl)-2-(phenylsulfonyl)ethan-1-ol (2o):**

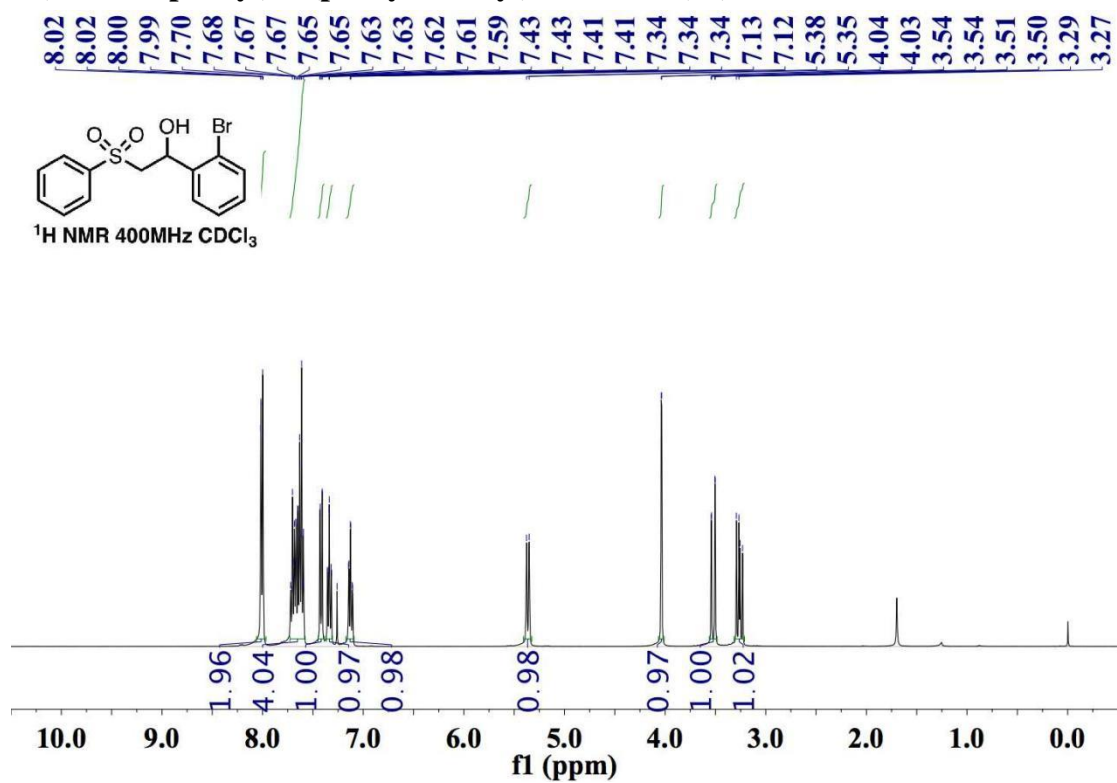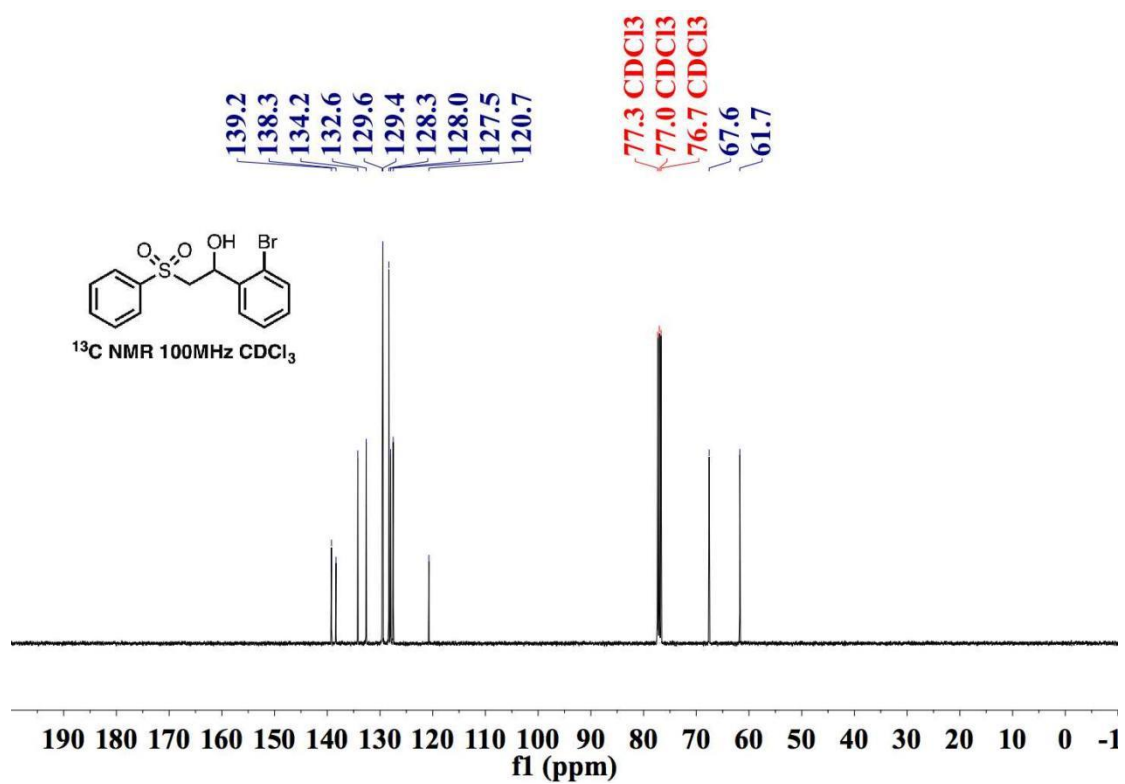

**2-Methyl-1-phenyl-2-(phenylsulfonyl)propan-1-ol (2p):**

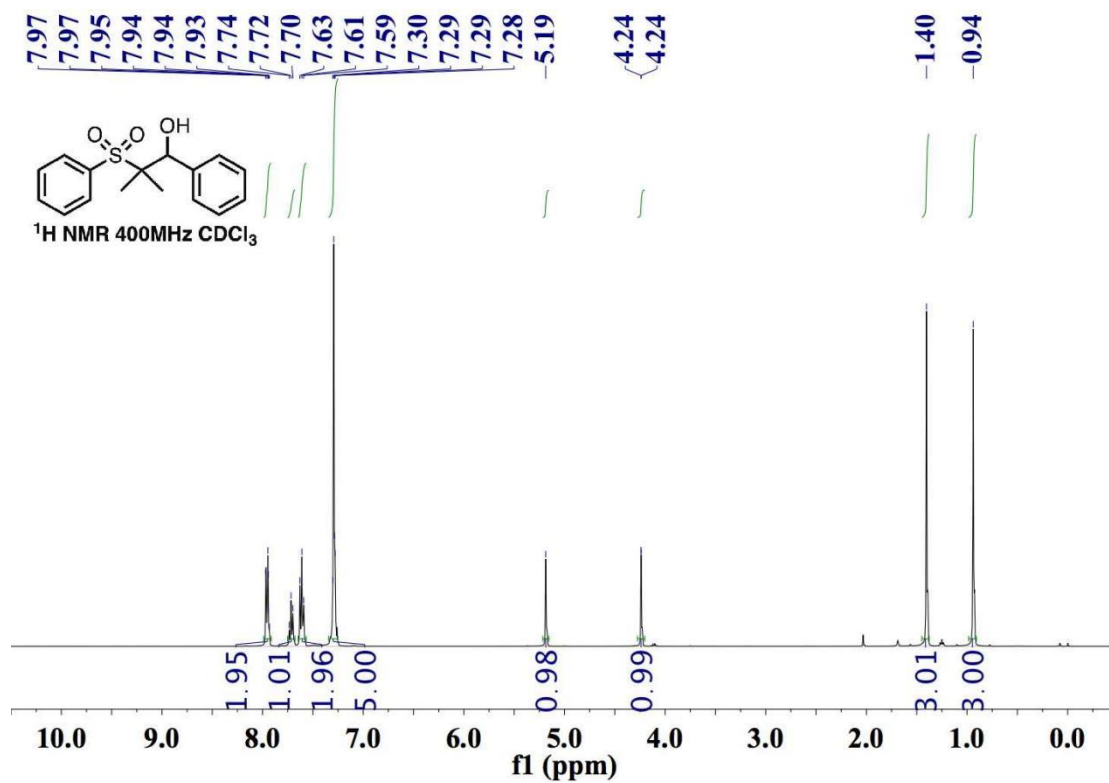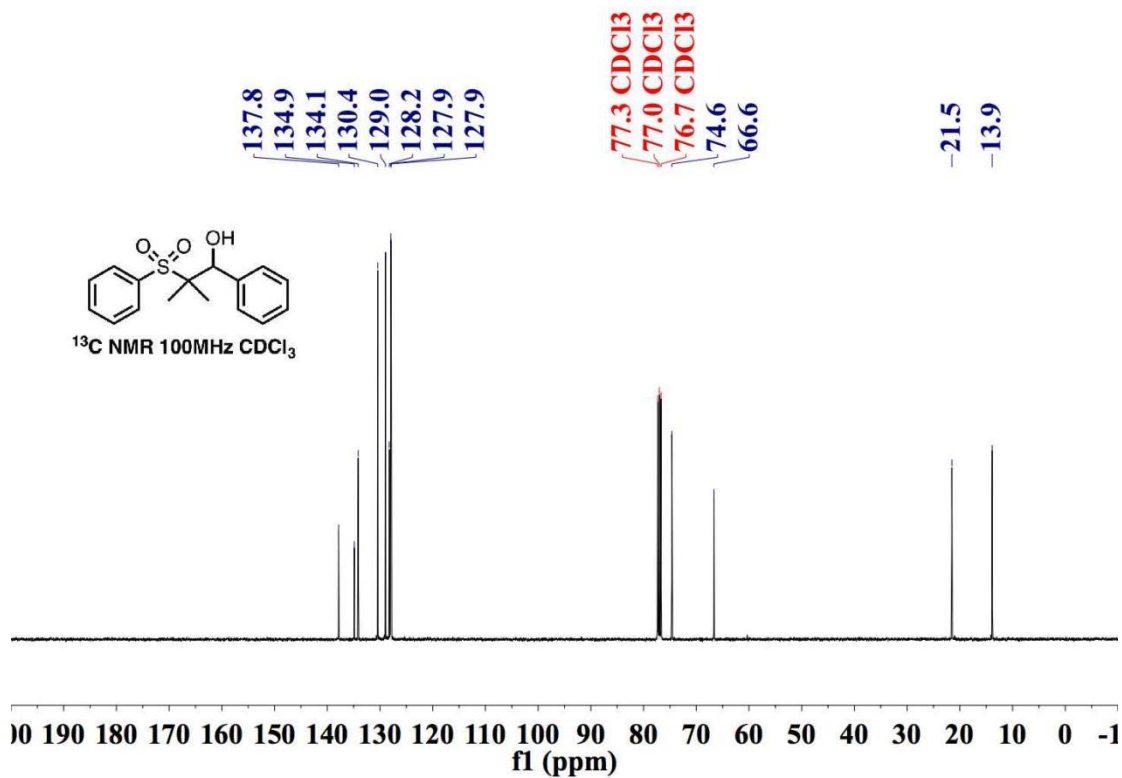

**2-Methyl-2-(phenylsulfonyl)-1-(o-tolyl)propan-1-ol (2q):**

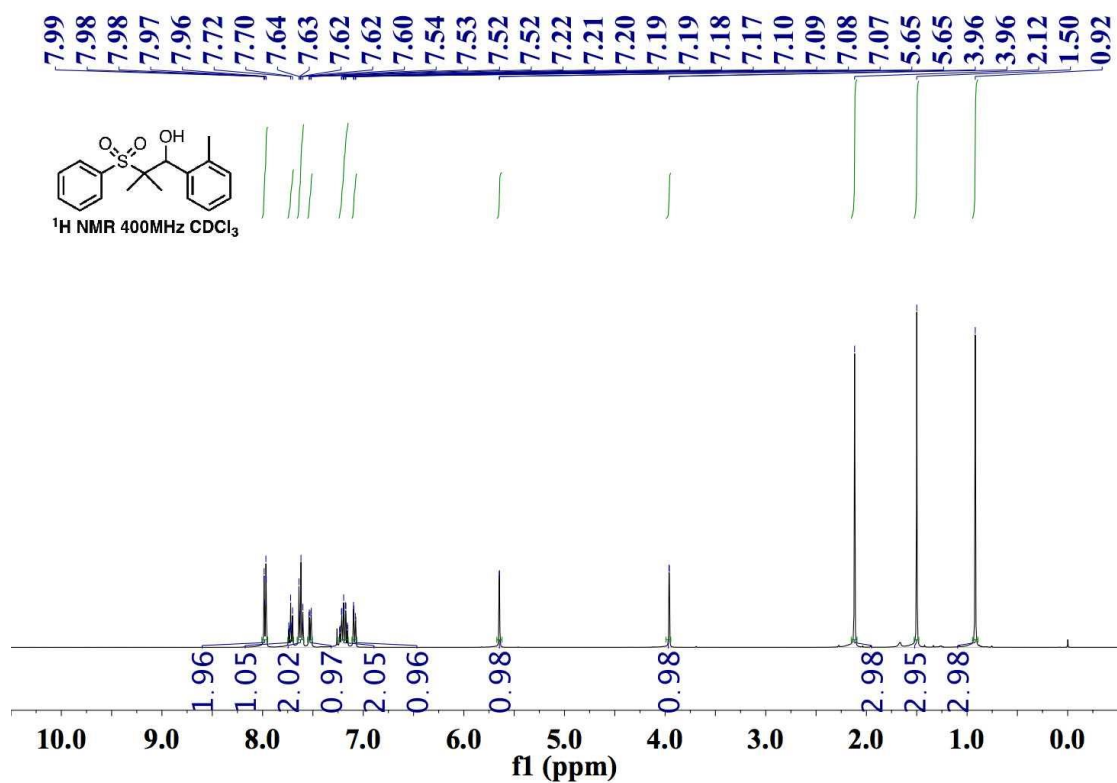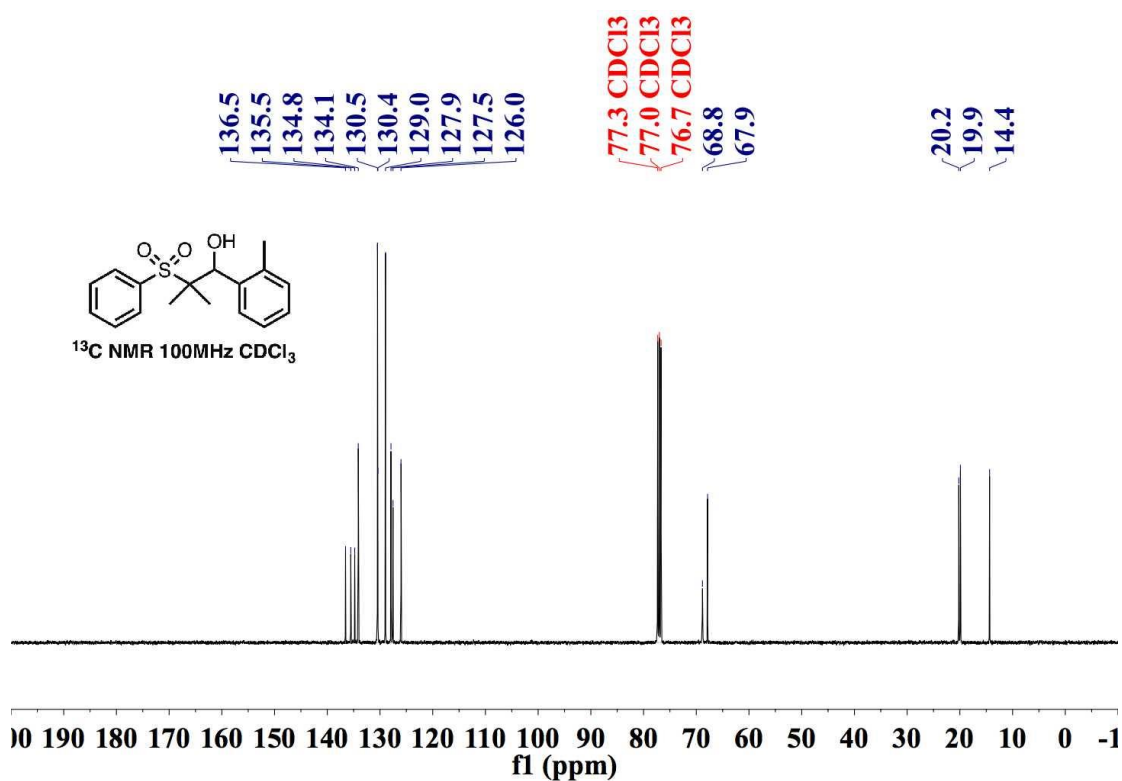

**1-(2-Methoxyphenyl)-2-methyl-2-(phenylsulfonyl)propan-1-ol (2r):**

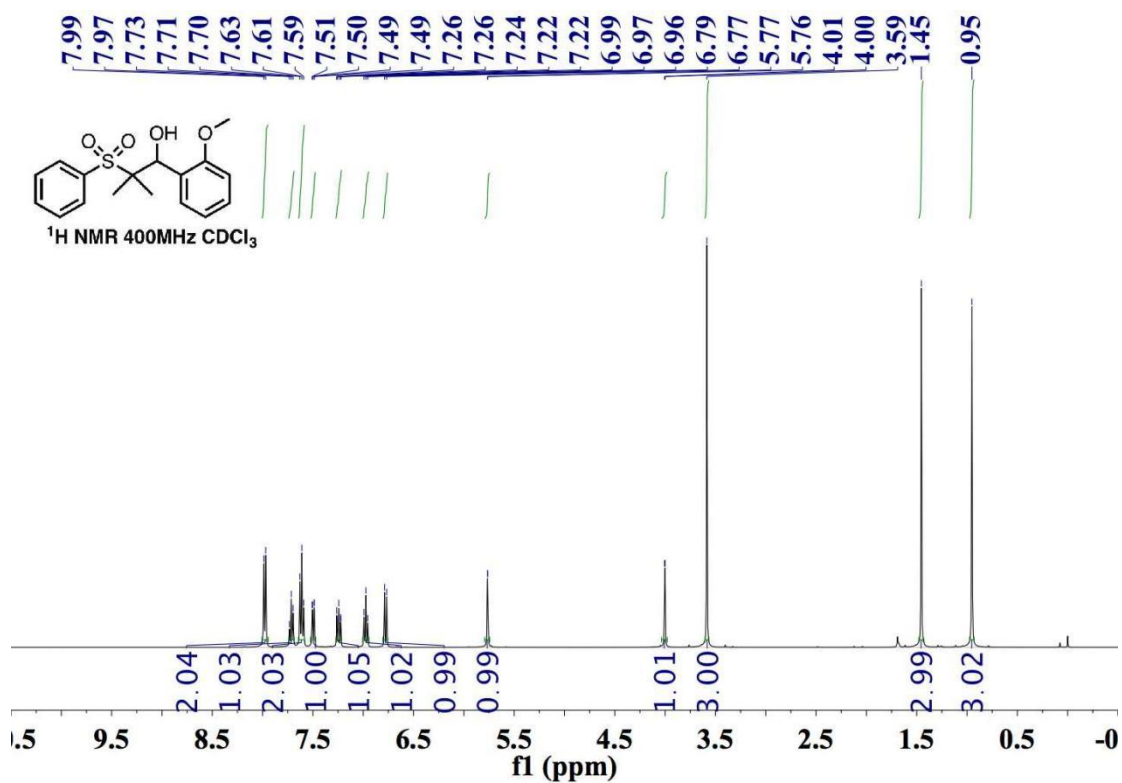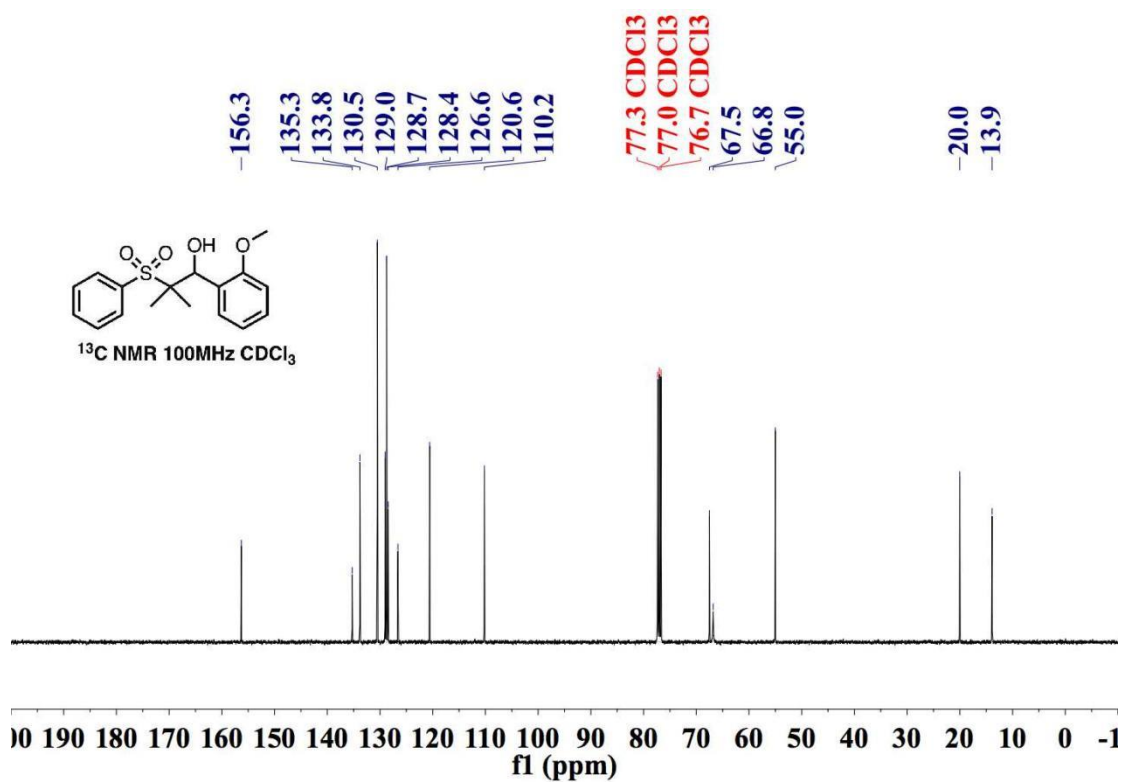



**2-Methyl-2-(phenylsulfonyl)-1-(2-(trifluoromethyl)phenyl)propan-1-ol (2s):**

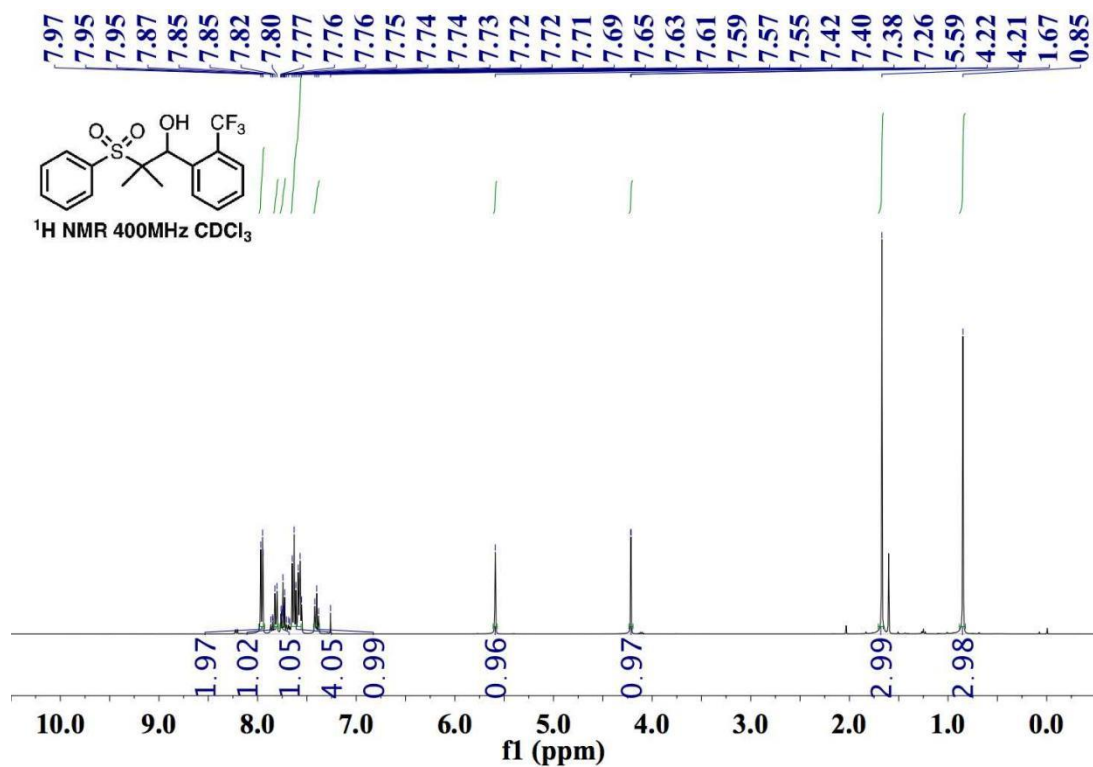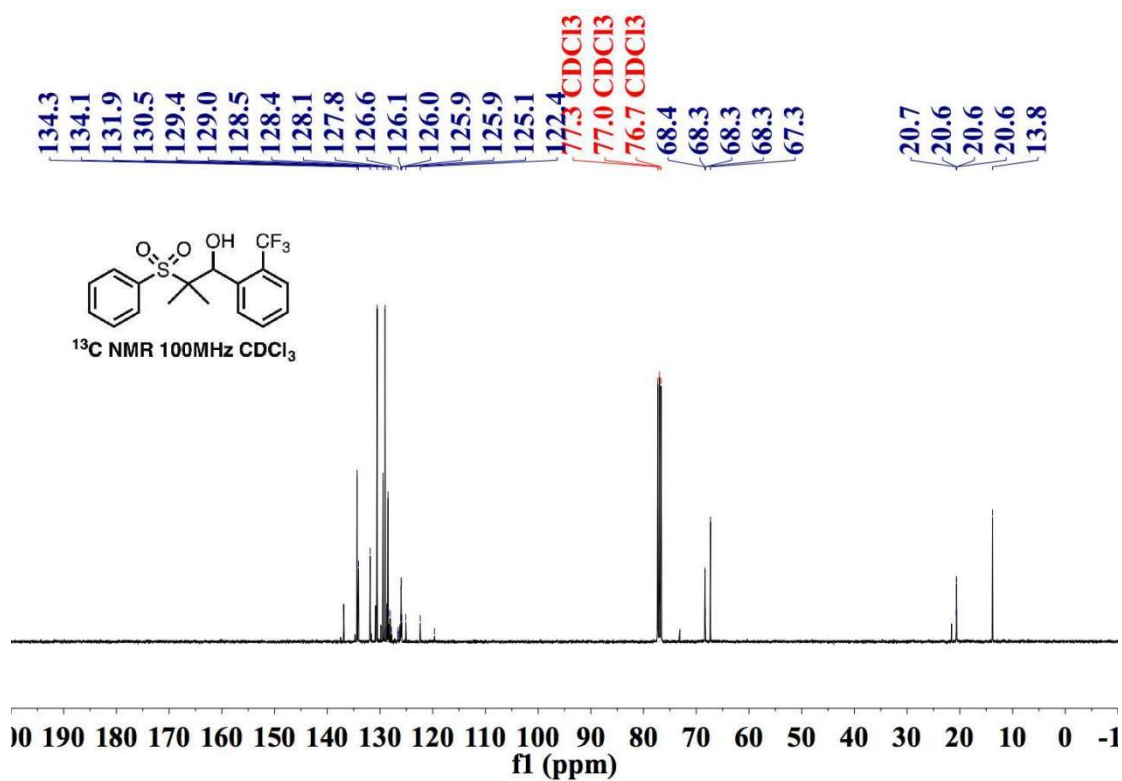

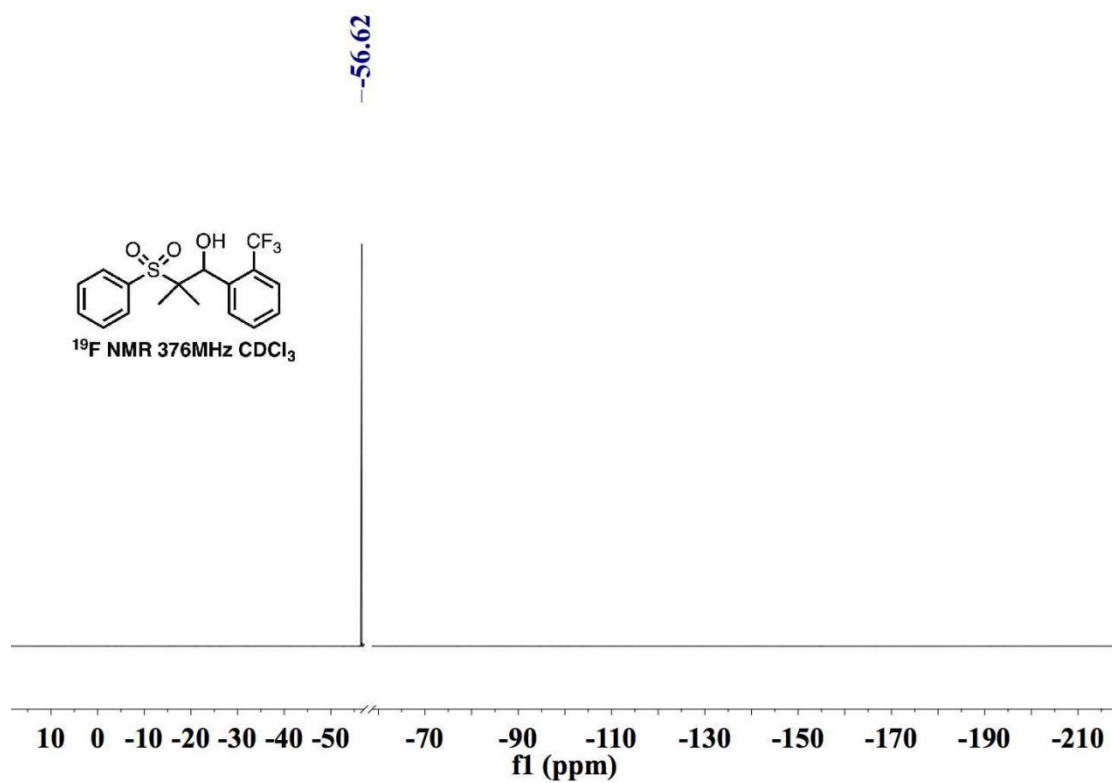

**1-(2-Fluorophenyl)-2-methyl-2-(phenylsulfonyl)propan-1-ol (2t):**

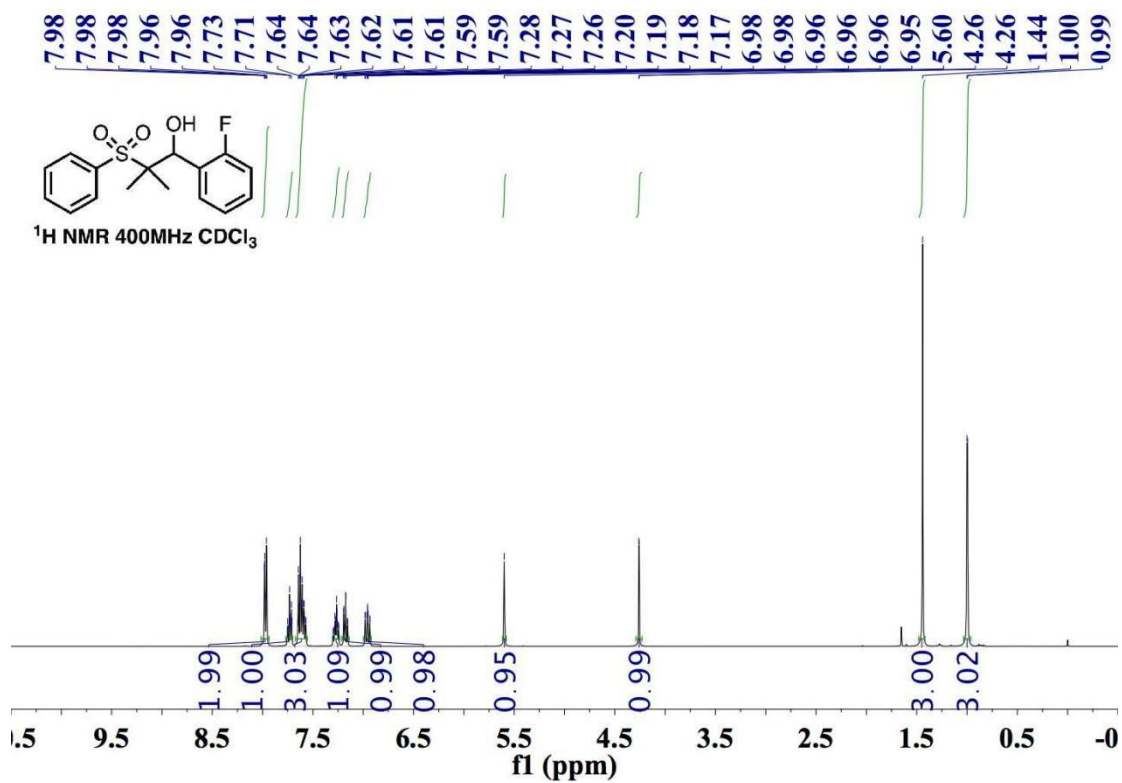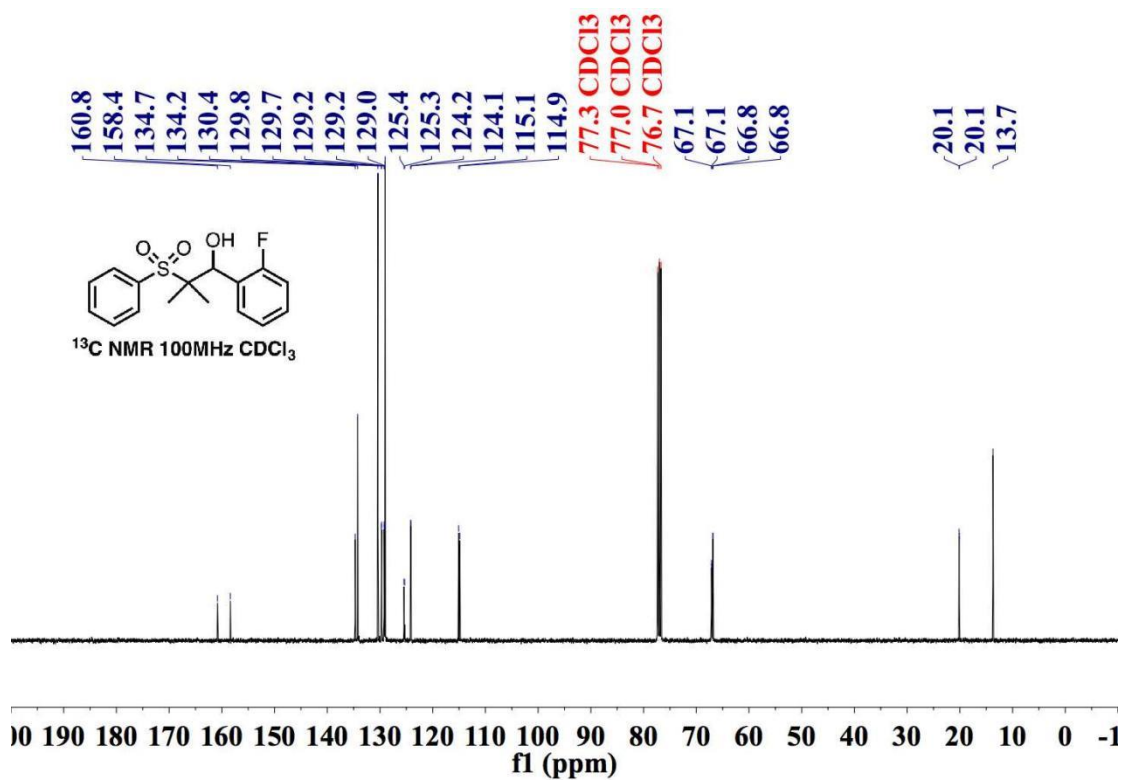

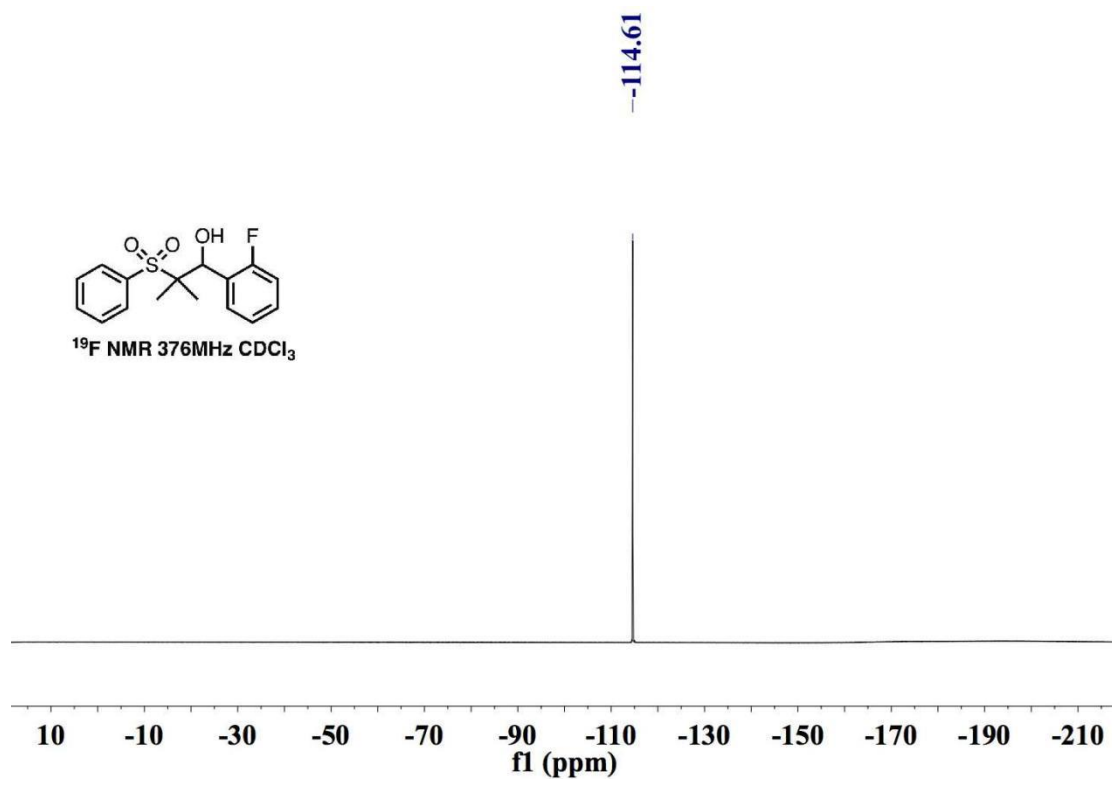

**2-Methyl-2-(phenylsulfonyl)-1-(m-tolyl)propan-1-ol (2u):**

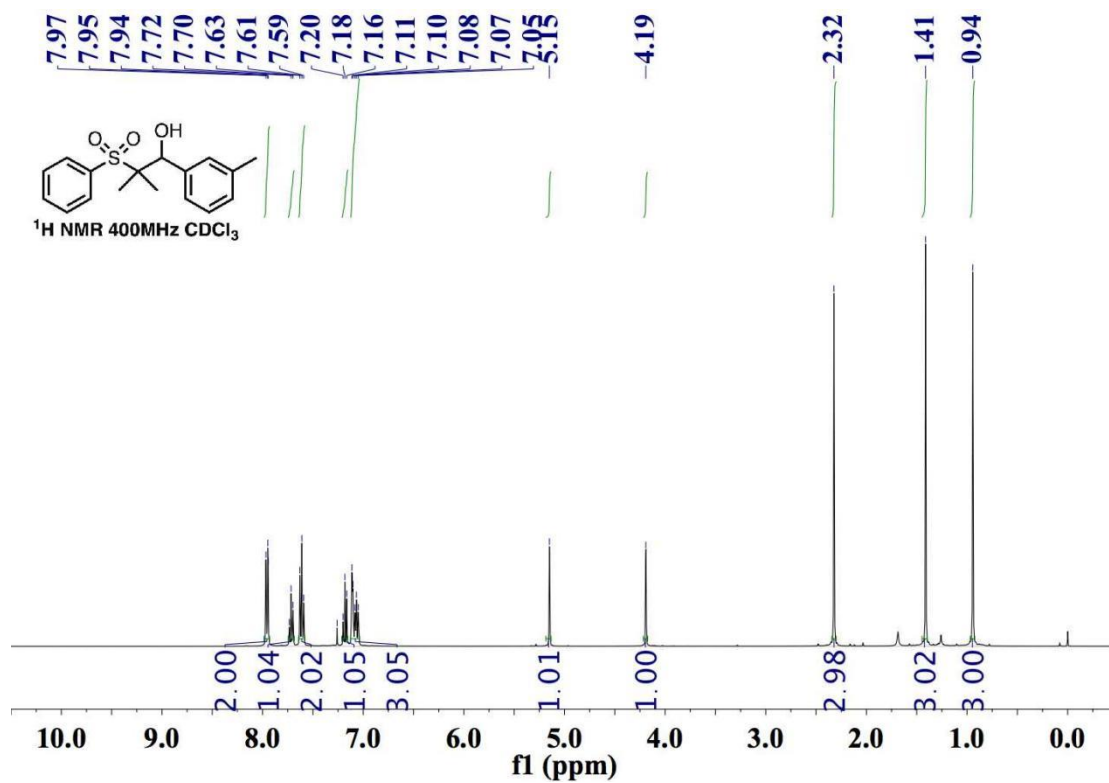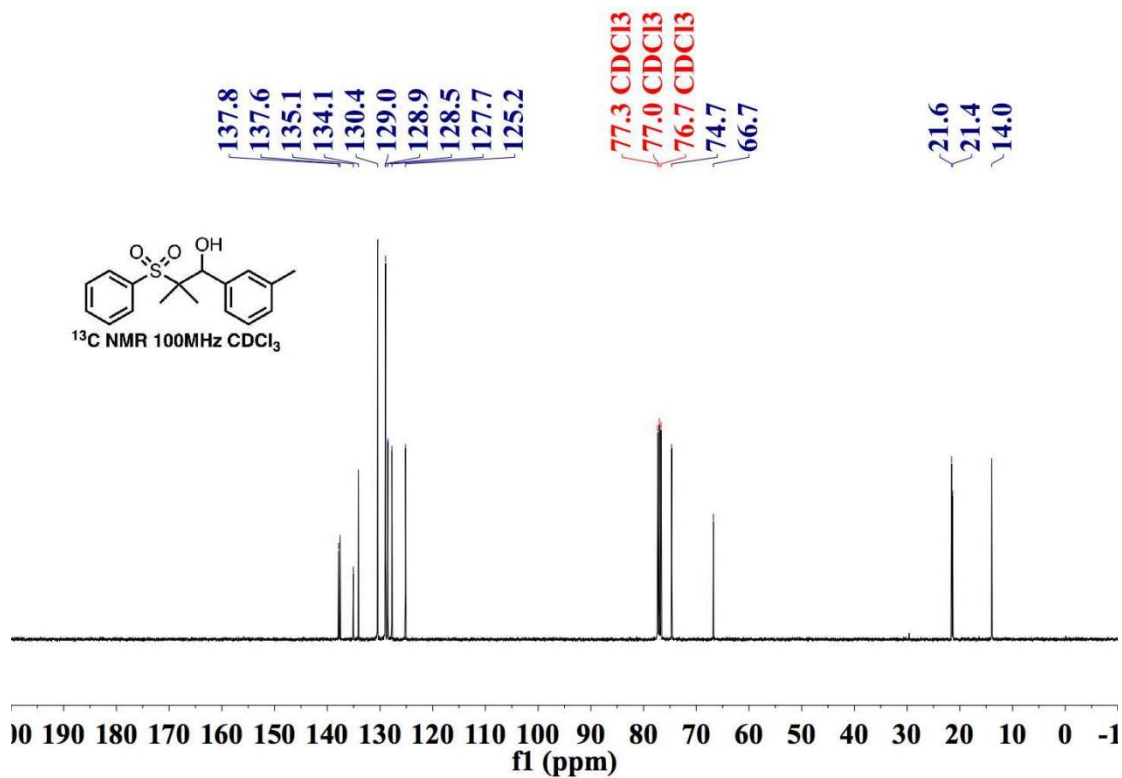

**1-(3-Methoxyphenyl)-2-methyl-2-(phenylsulfonyl)propan-1-ol (2v):**

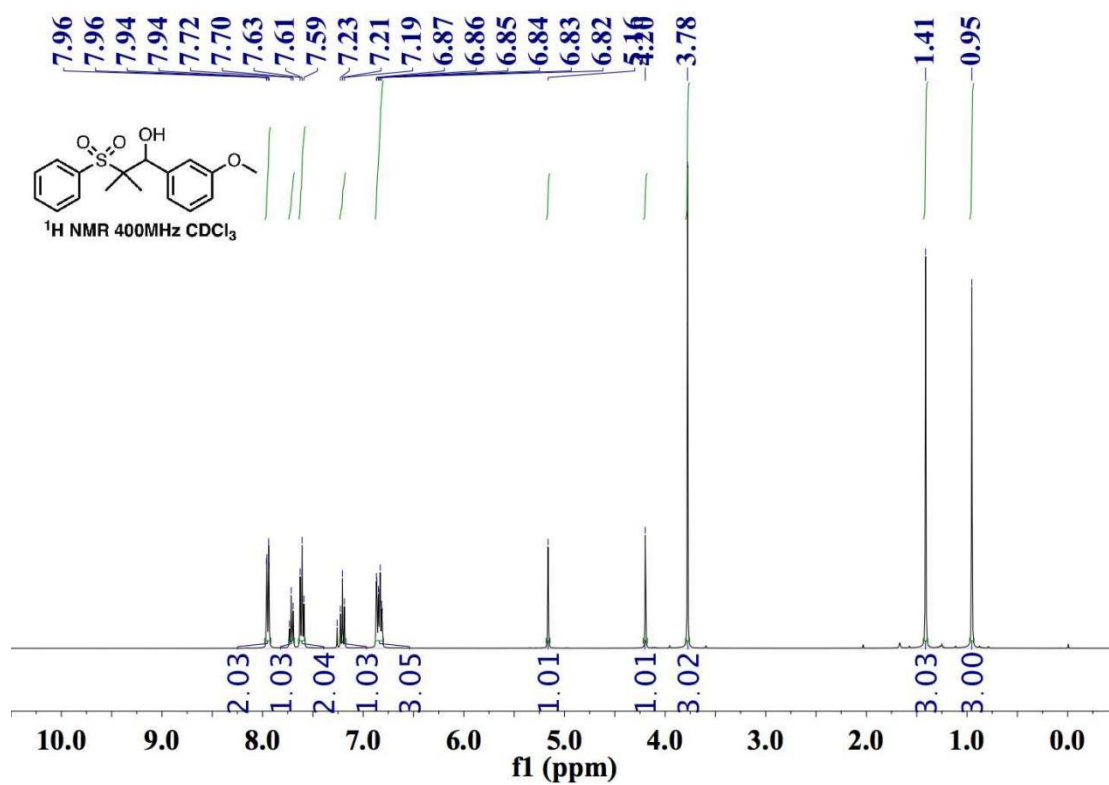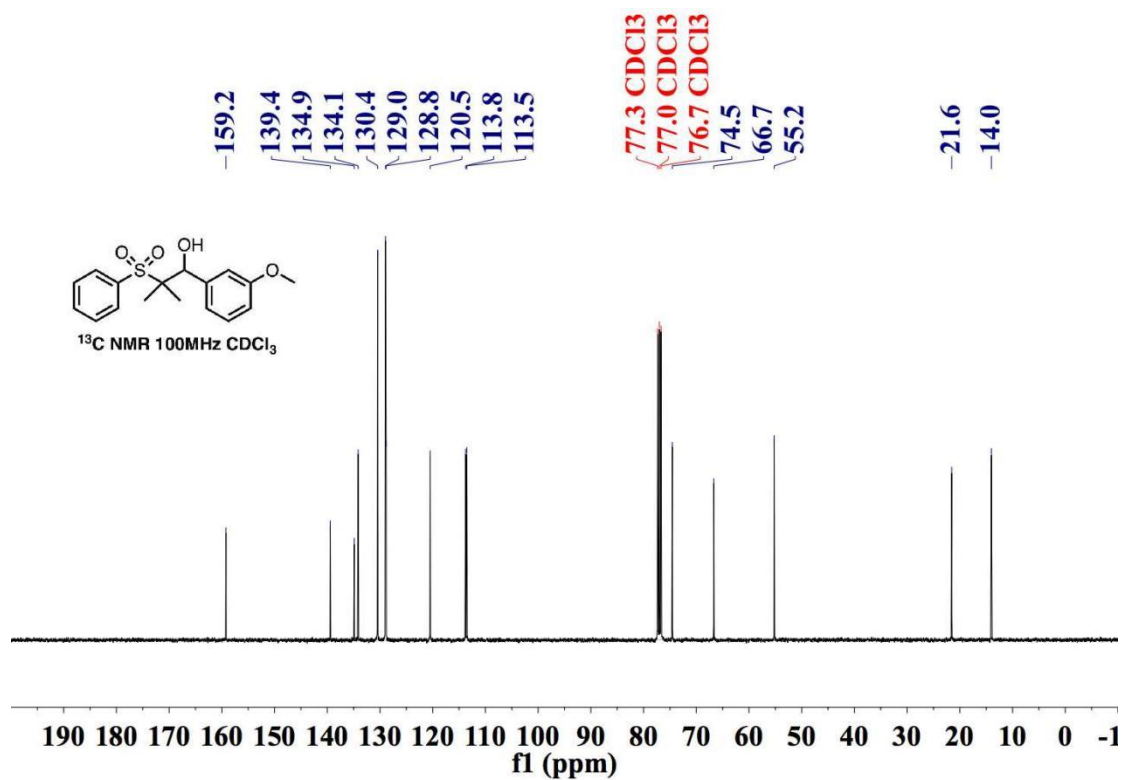

**1-(3-Bromophenyl)-2-methyl-2-(phenylsulfonyl)propan-1-ol (2w):**

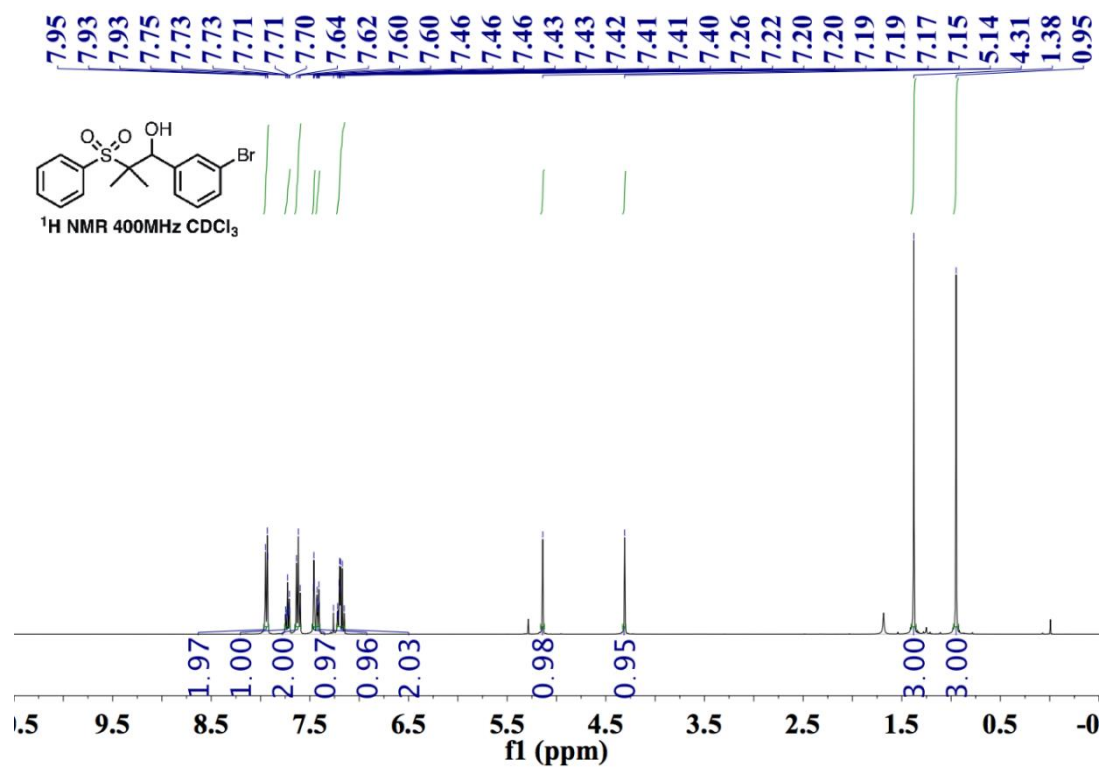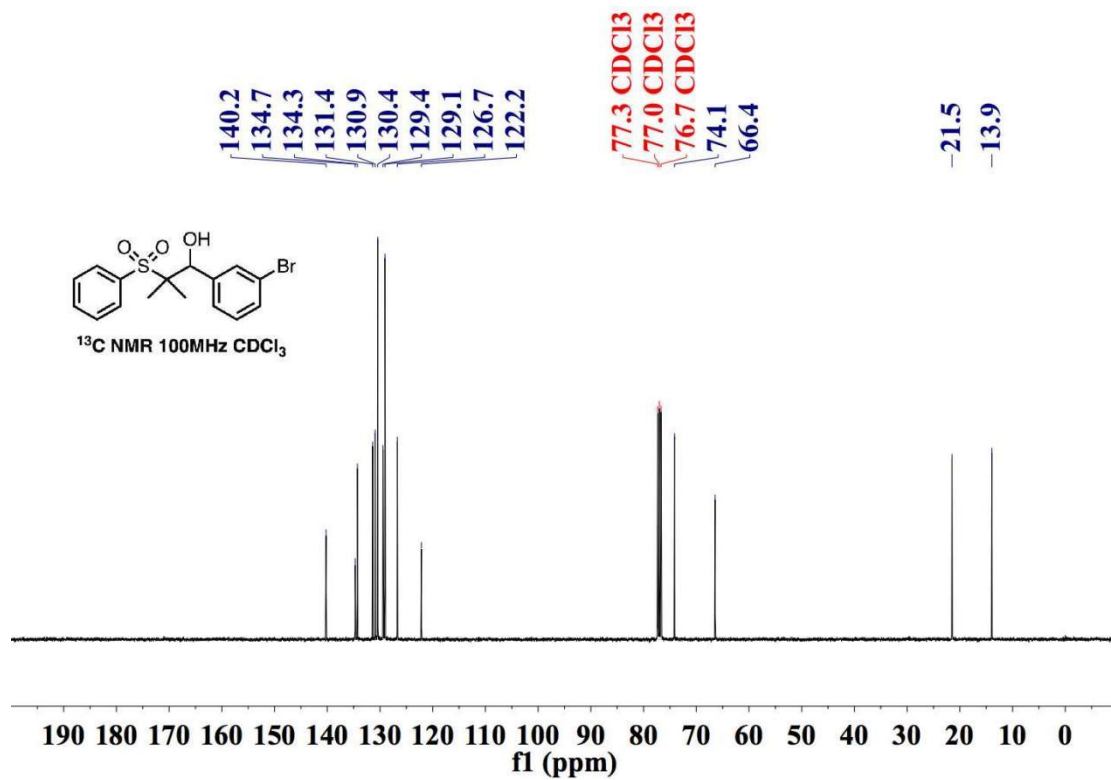

**2-Methyl-2-(phenylsulfonyl)-1-(p-tolyl)propan-1-ol (2x):**

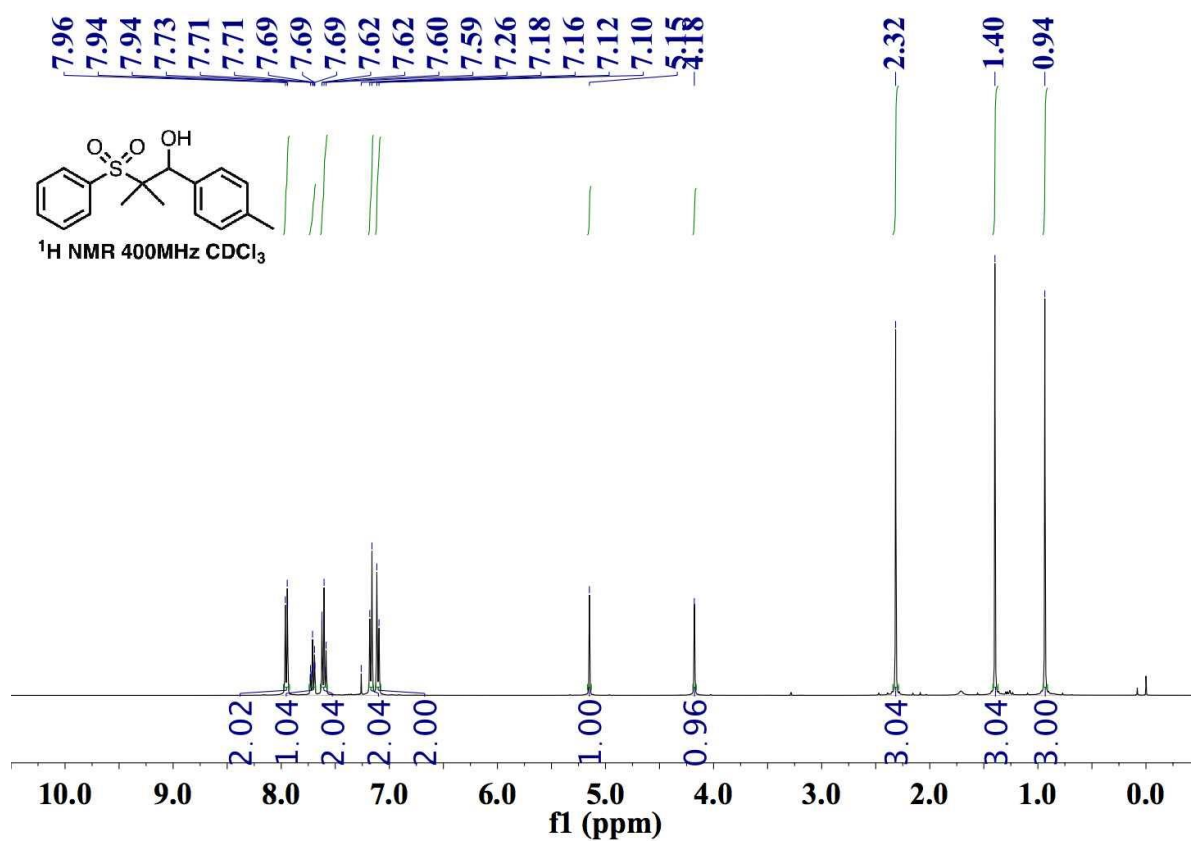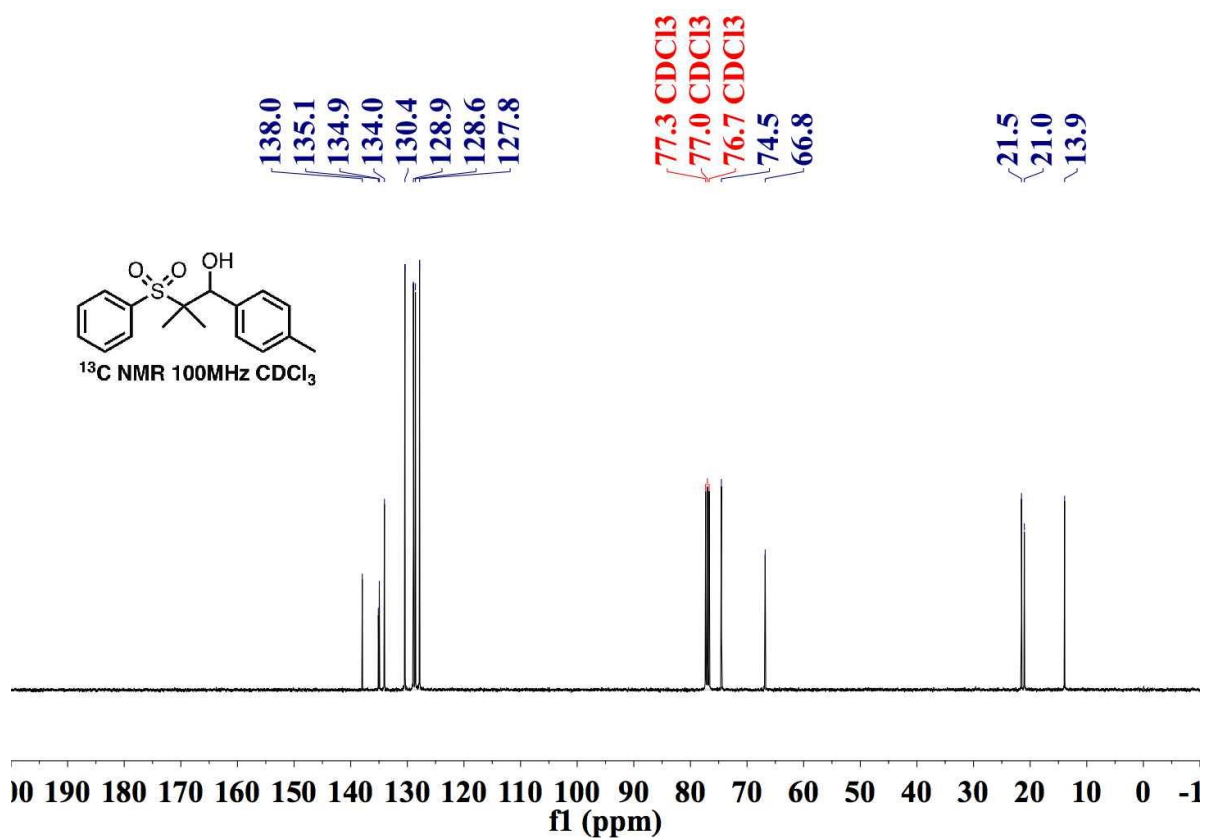



**1-(4-Methoxyphenyl)-2-methyl-2-(phenylsulfonyl)-propan-1-ol (2y):**

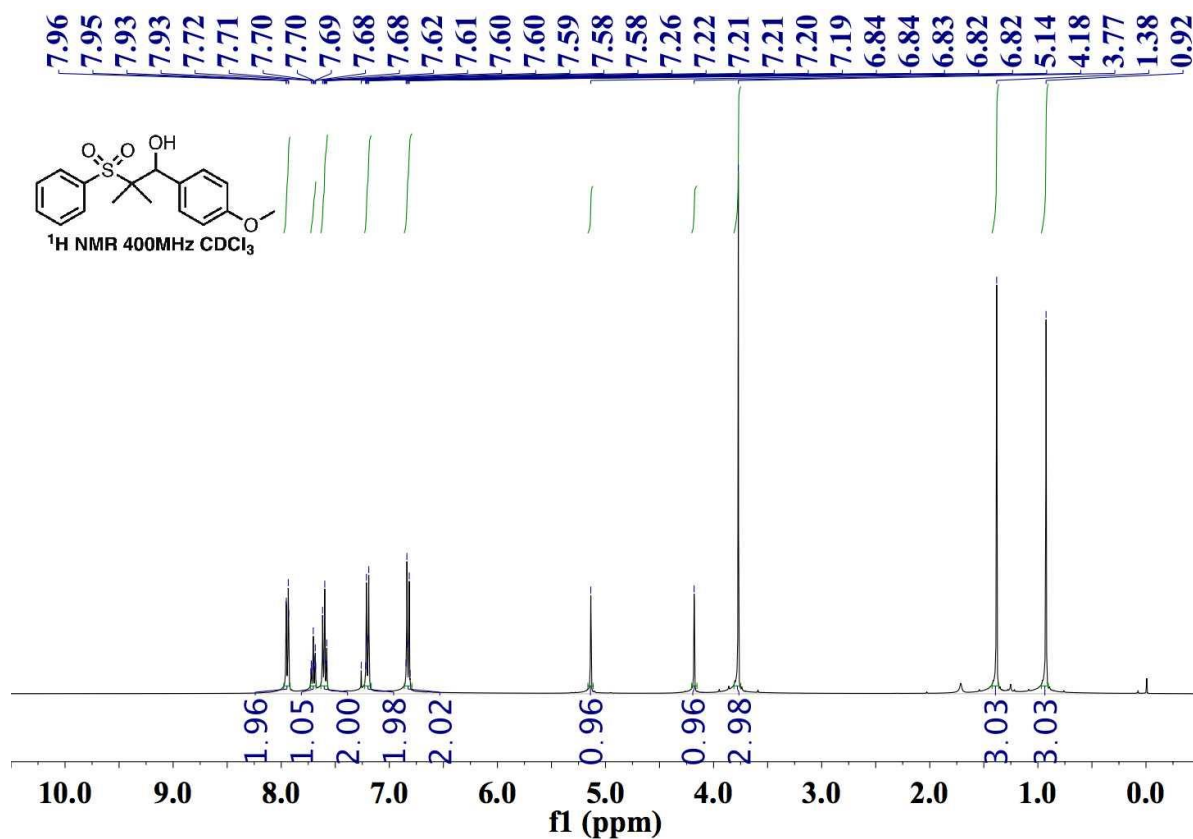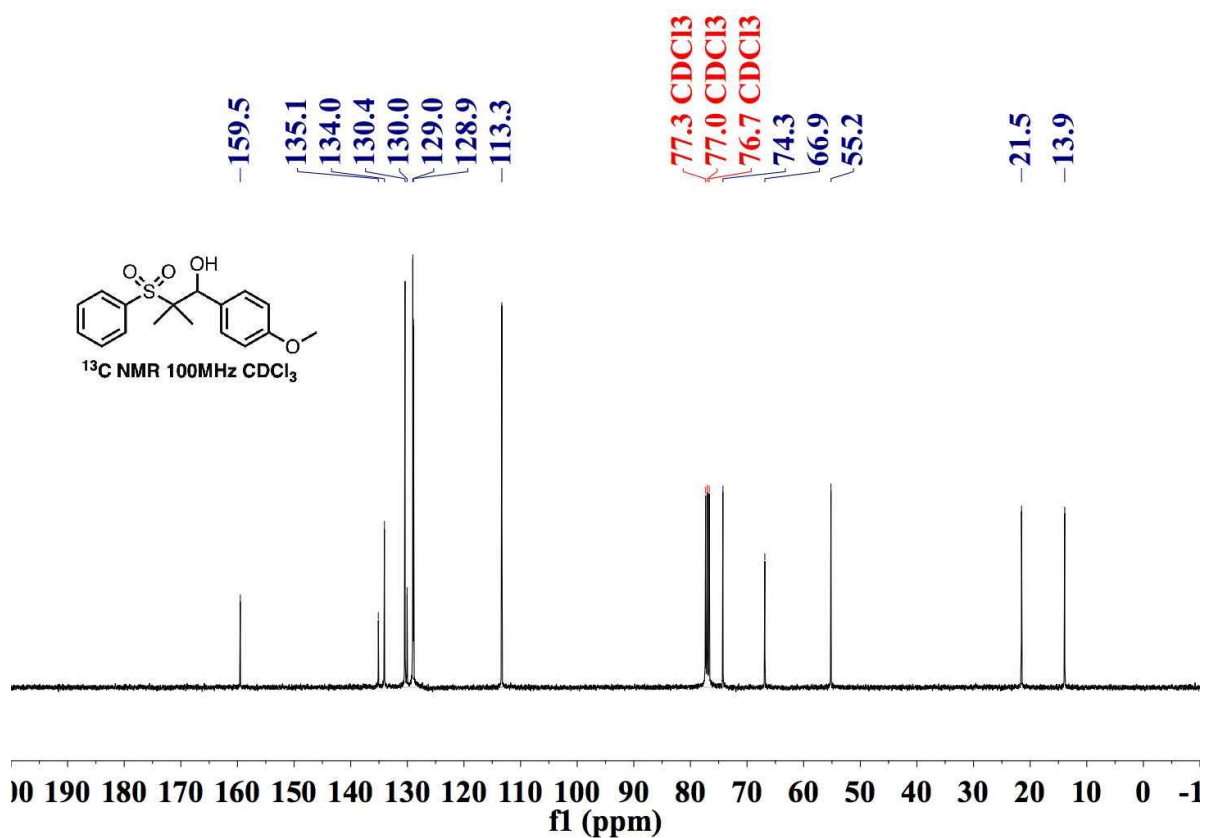

1-(4-Fluorophenyl)-2-methyl-2-(phenylsulfonyl)propan-1-ol (2z):

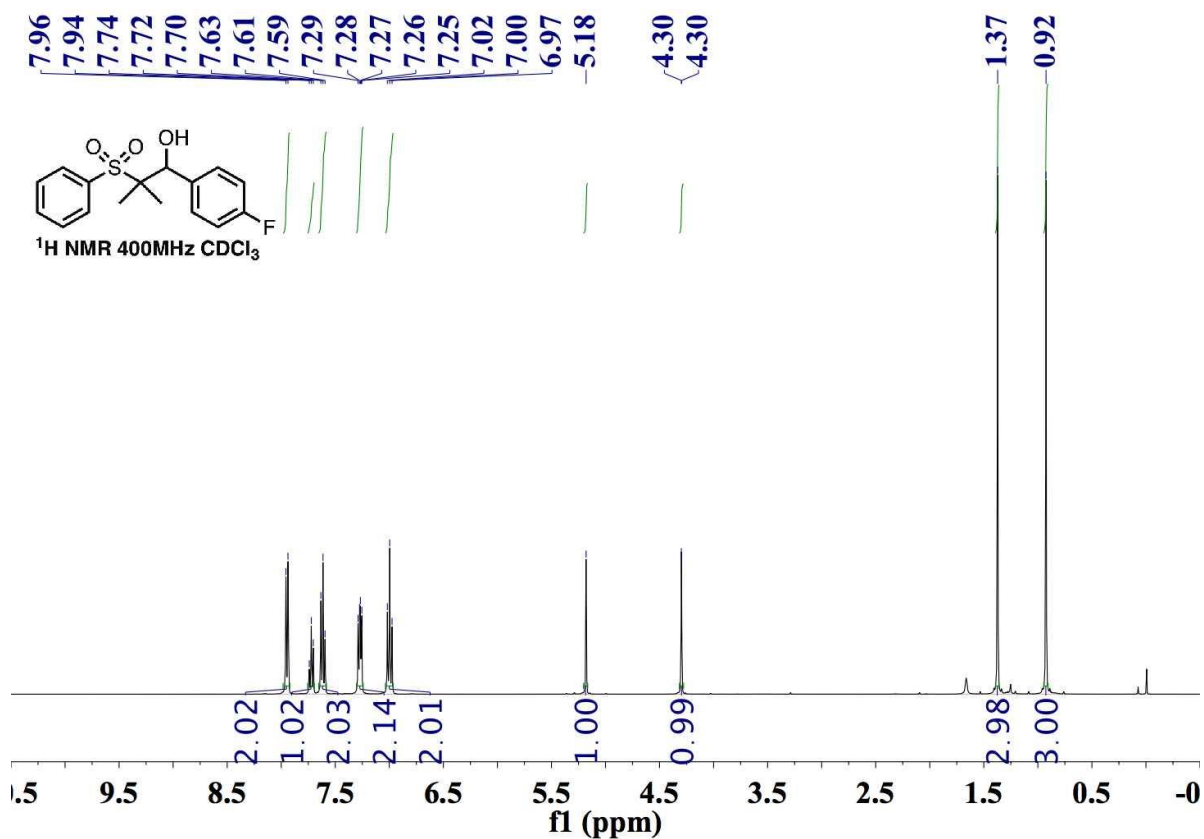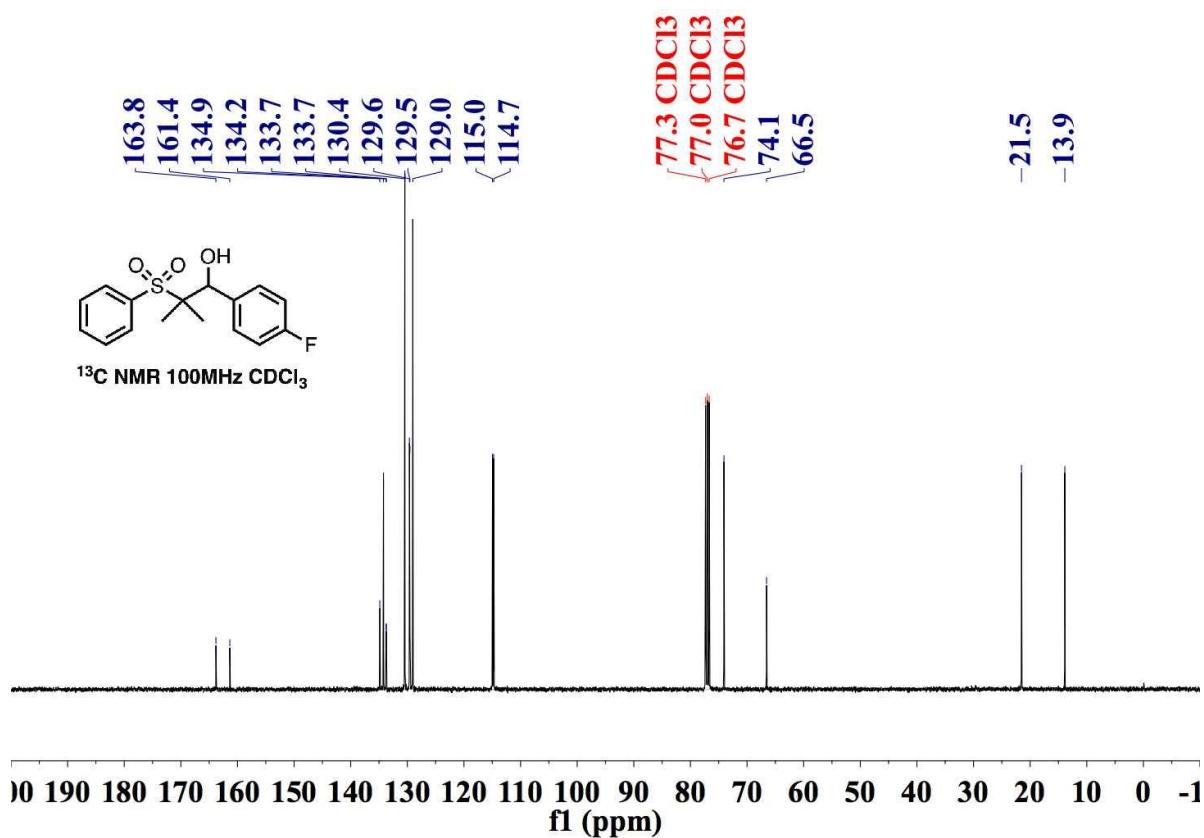

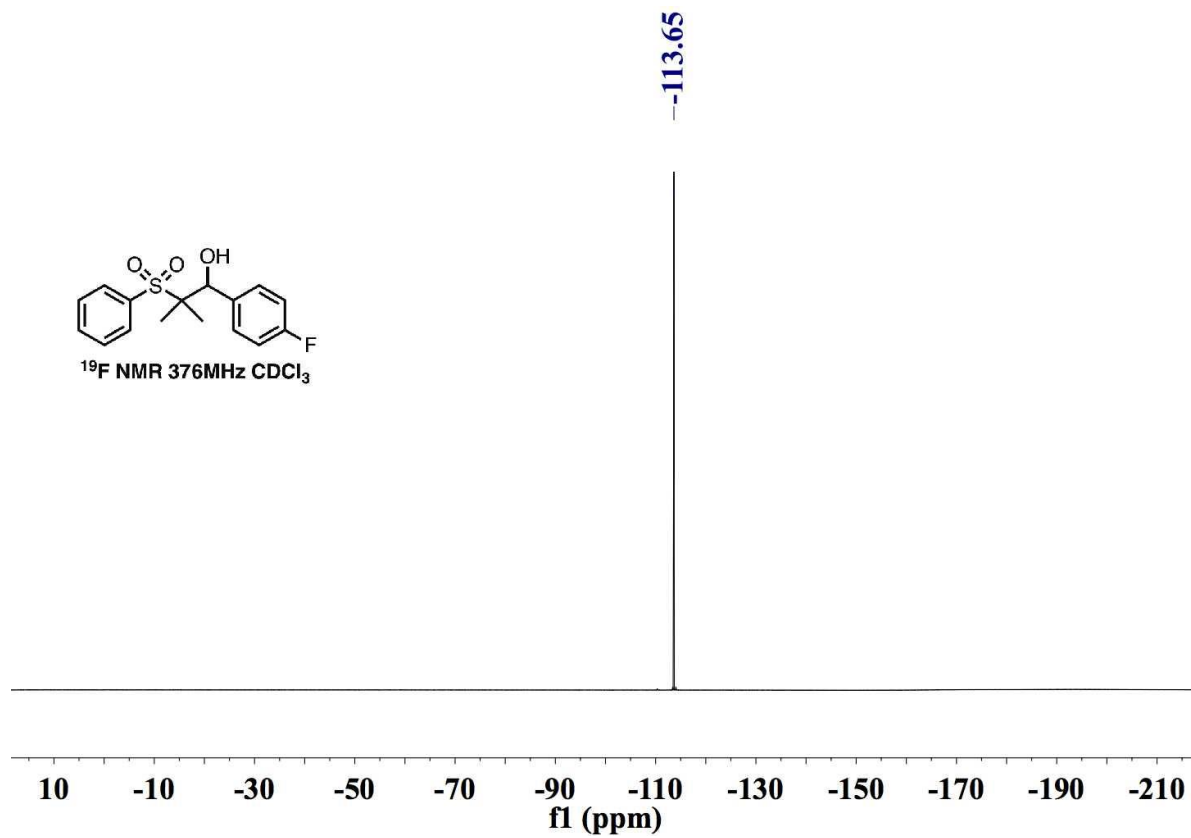

2-Methyl-2-(phenylsulfonyl)-1-(4-(trifluoromethyl)phenyl)propan-1-ol (2aa):

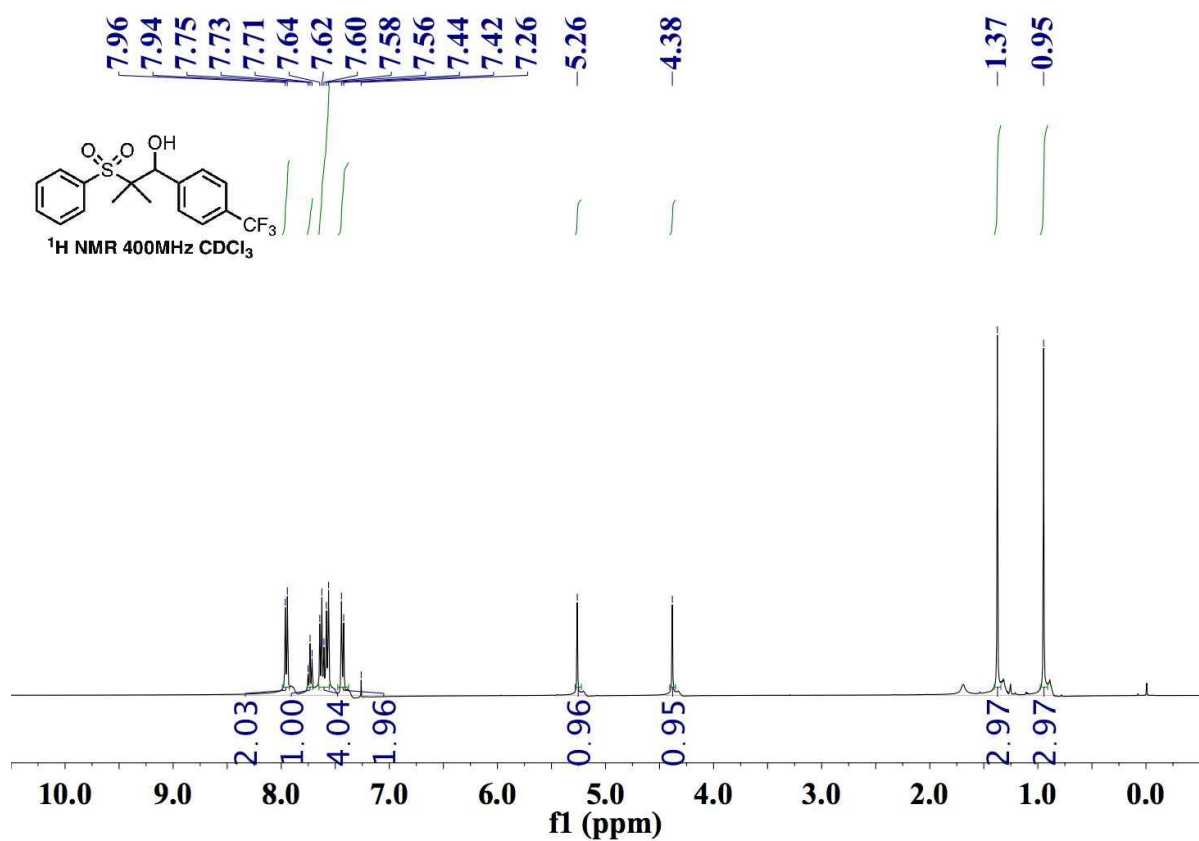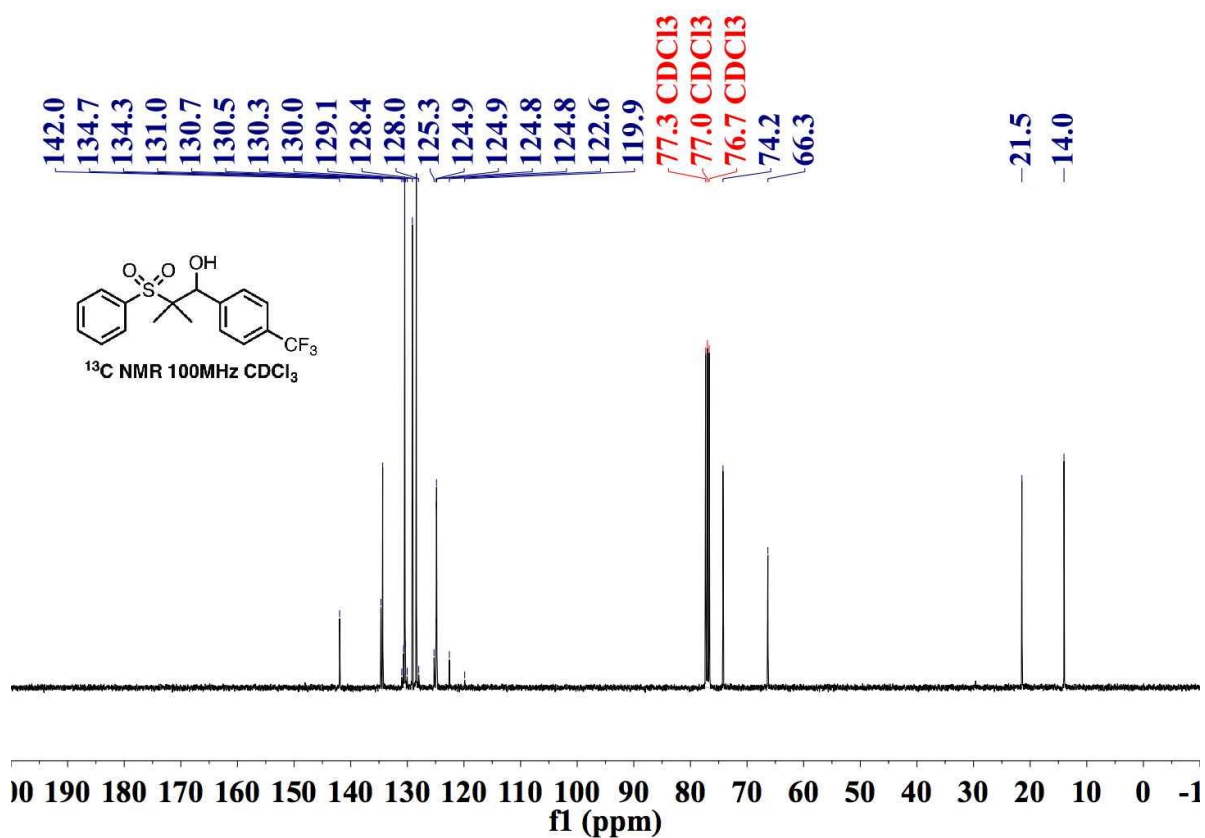

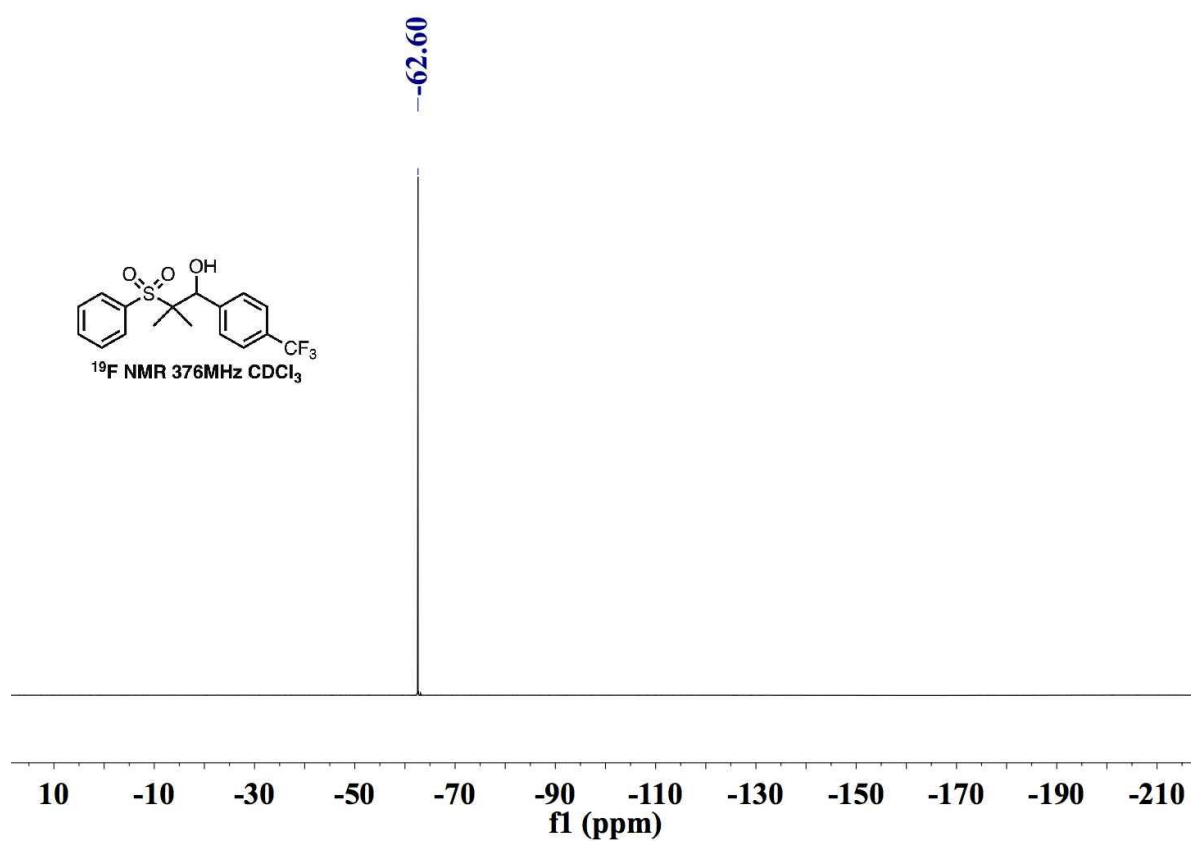

**1-(4-Bromophenyl)-2-methyl-2-(phenylsulfonyl)propan-1-ol (2ab):**

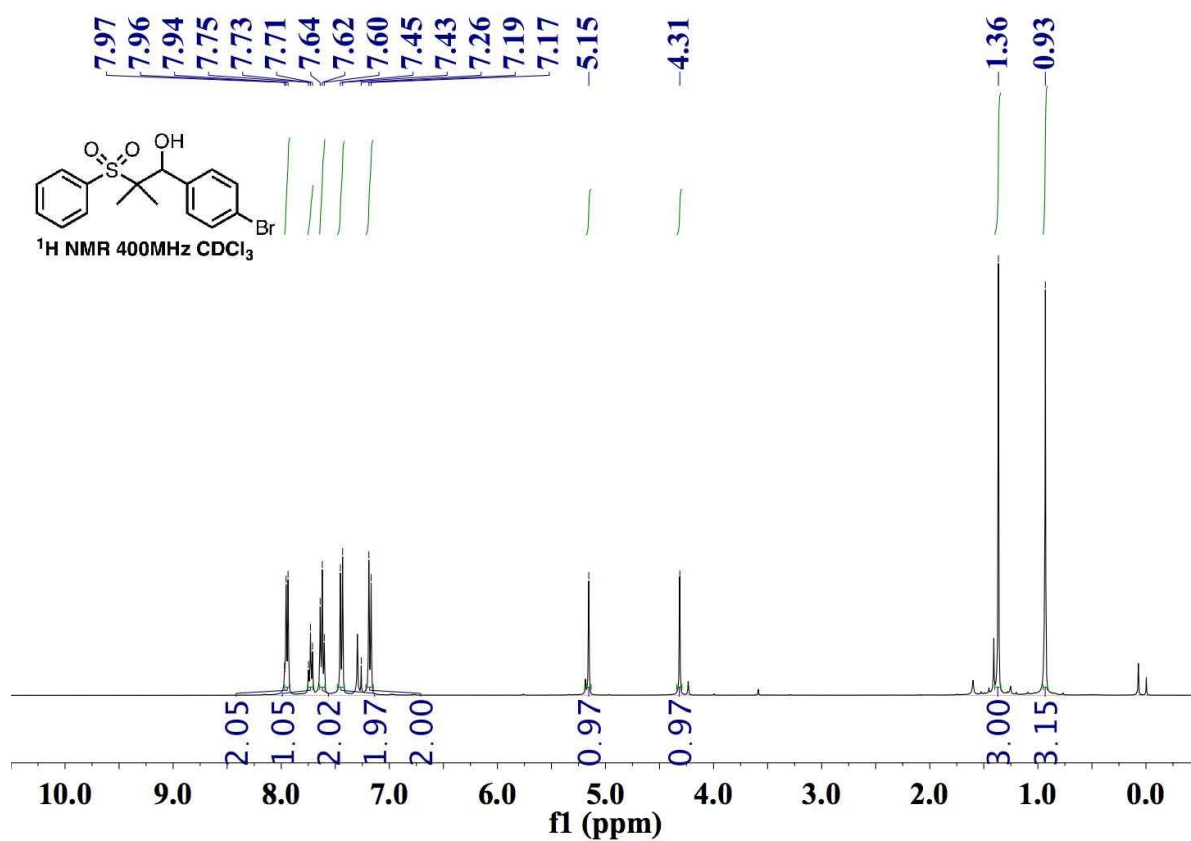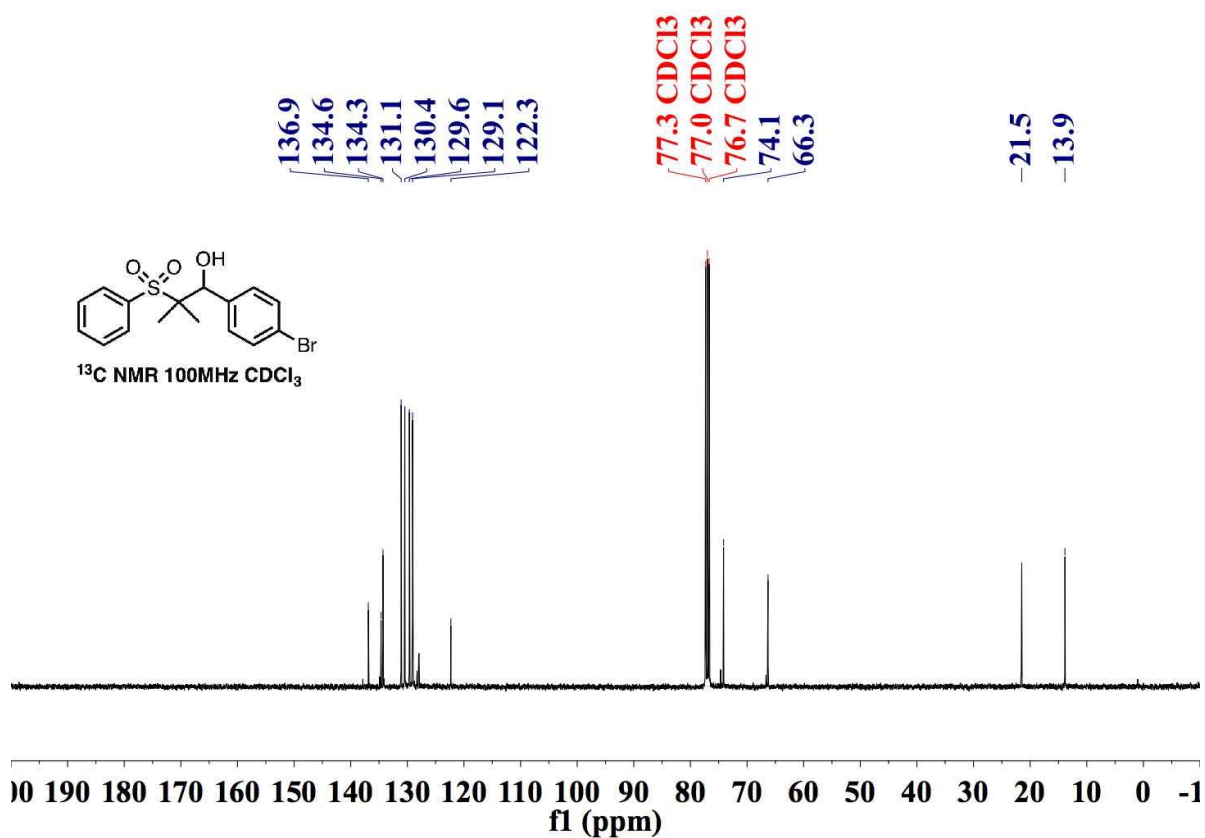

1-(3,4-Dimethoxyphenyl)-2-methyl-2-(phenylsulfonyl)propan-1-ol (2ac):

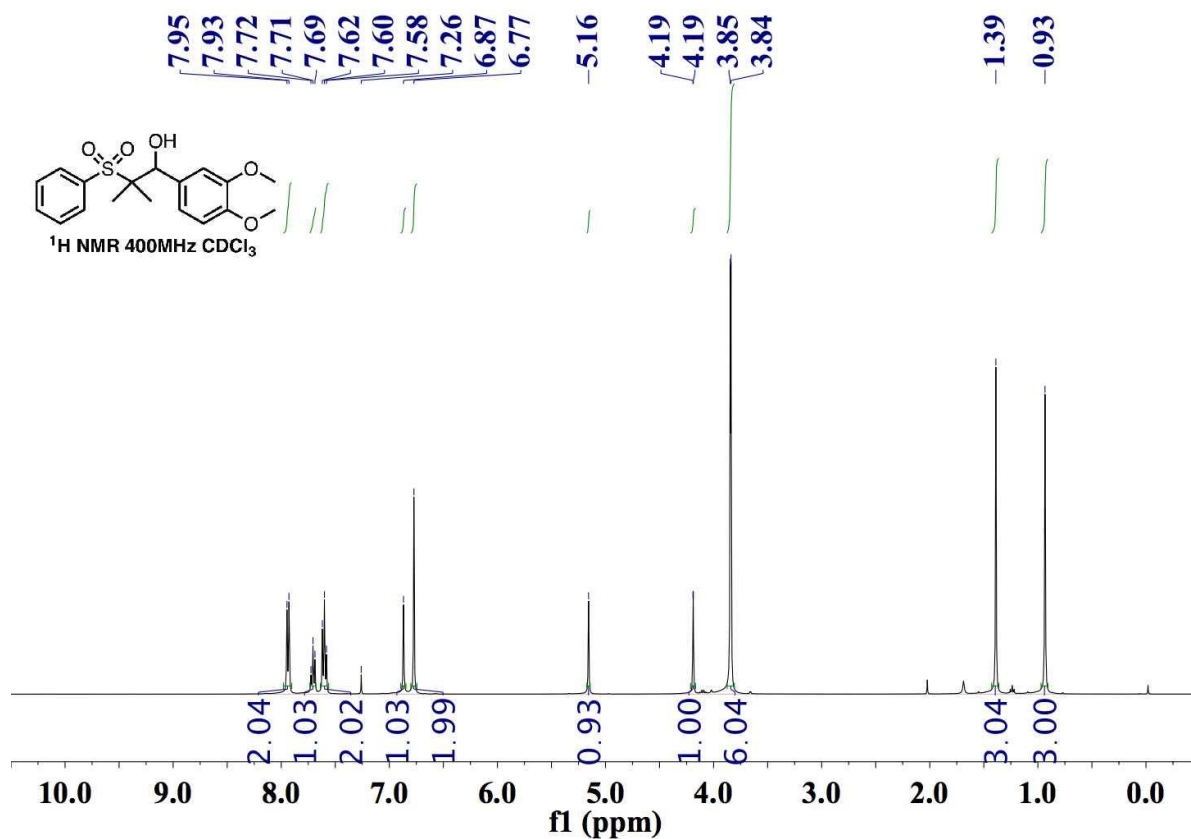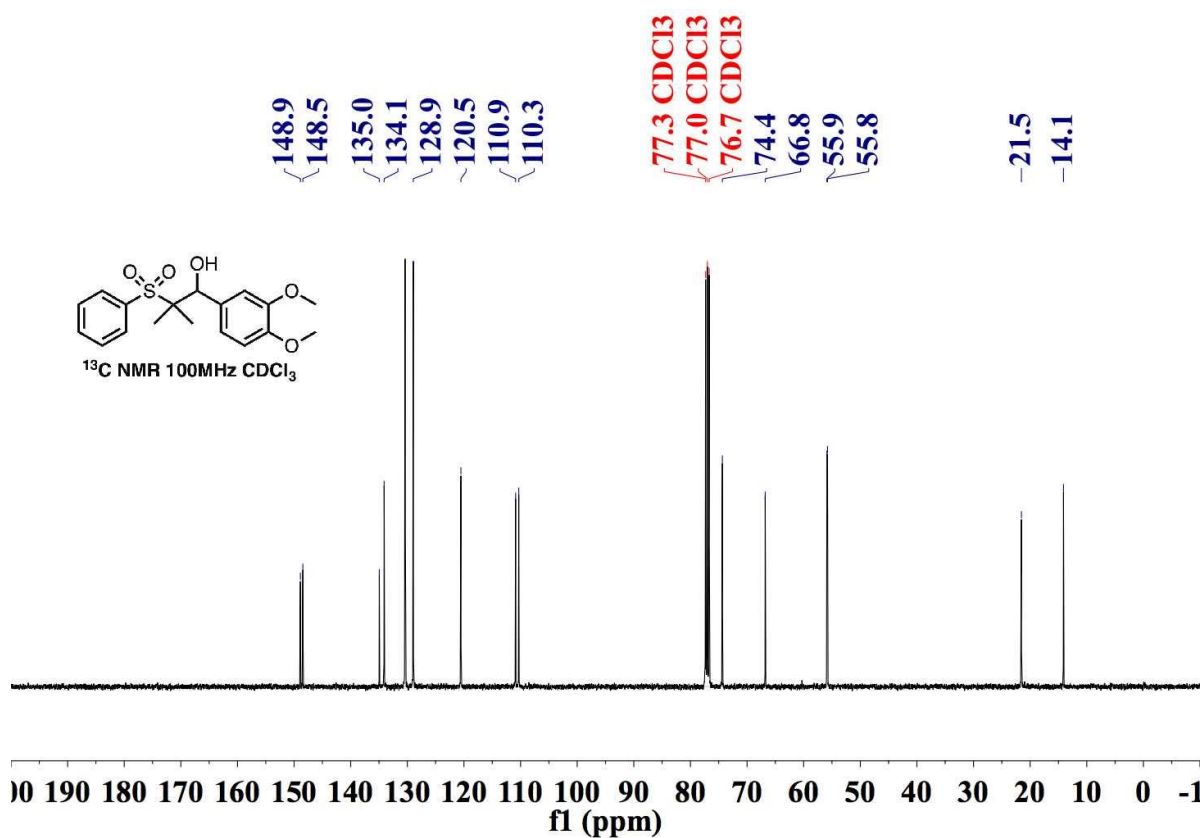

1-(2,4-Dichlorophenyl)-2-methyl-2-(phenylsulfonyl)propan-1-ol (2ad):

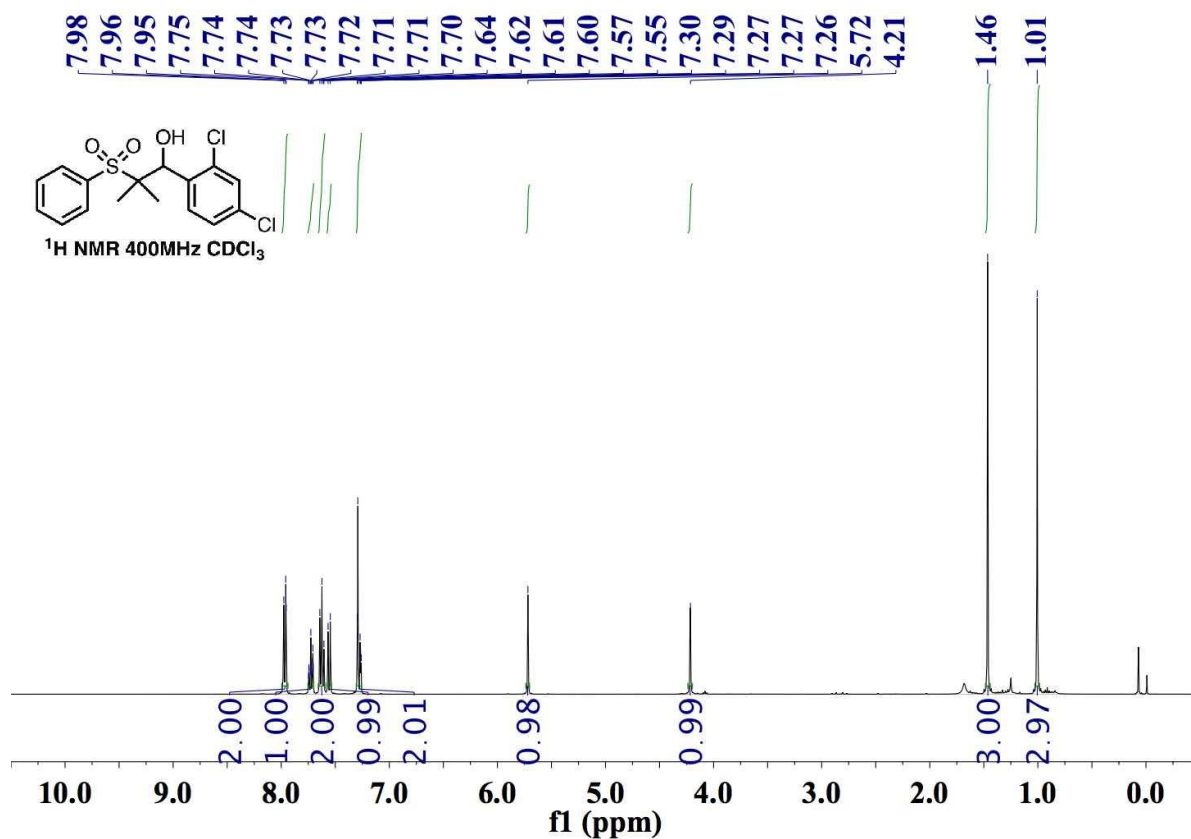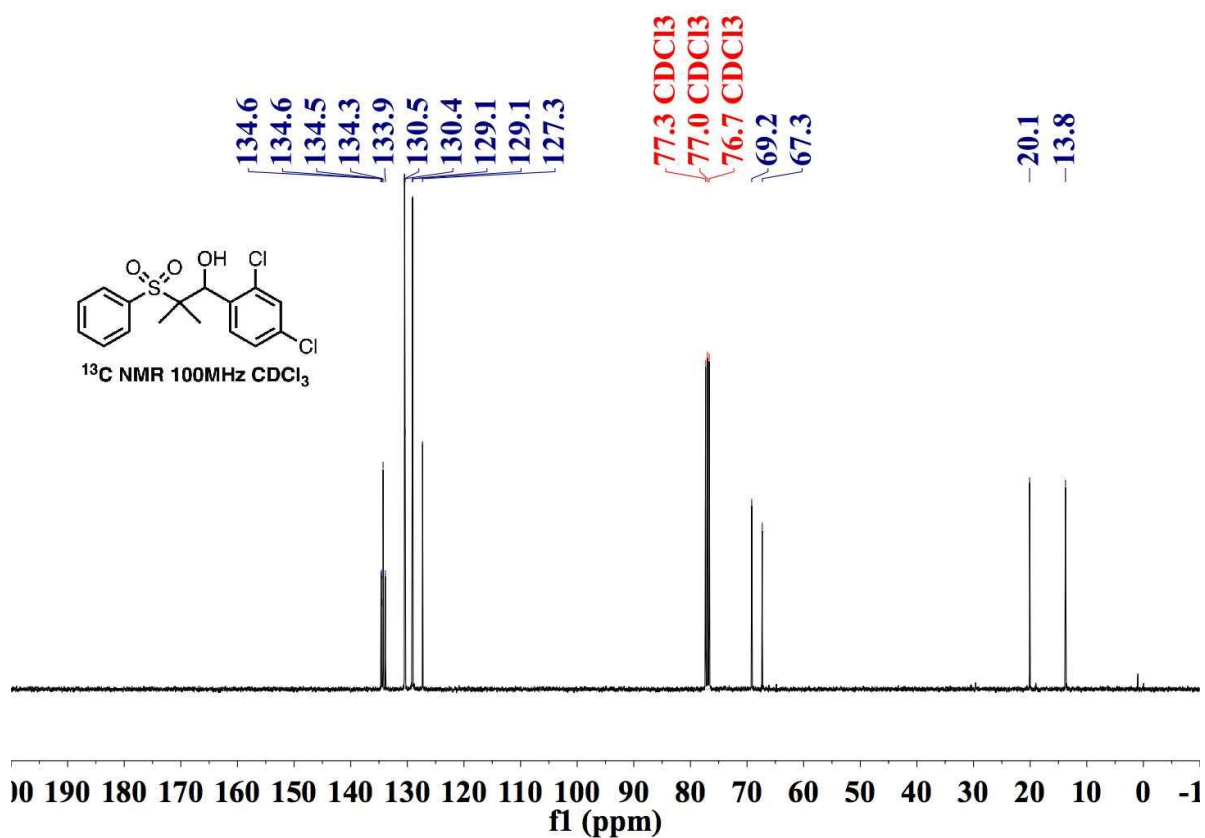



**1-(4-Fluoro-2-iodophenyl)-2-methyl-2-(phenylsulfonyl)propan-1-ol (2ae):**

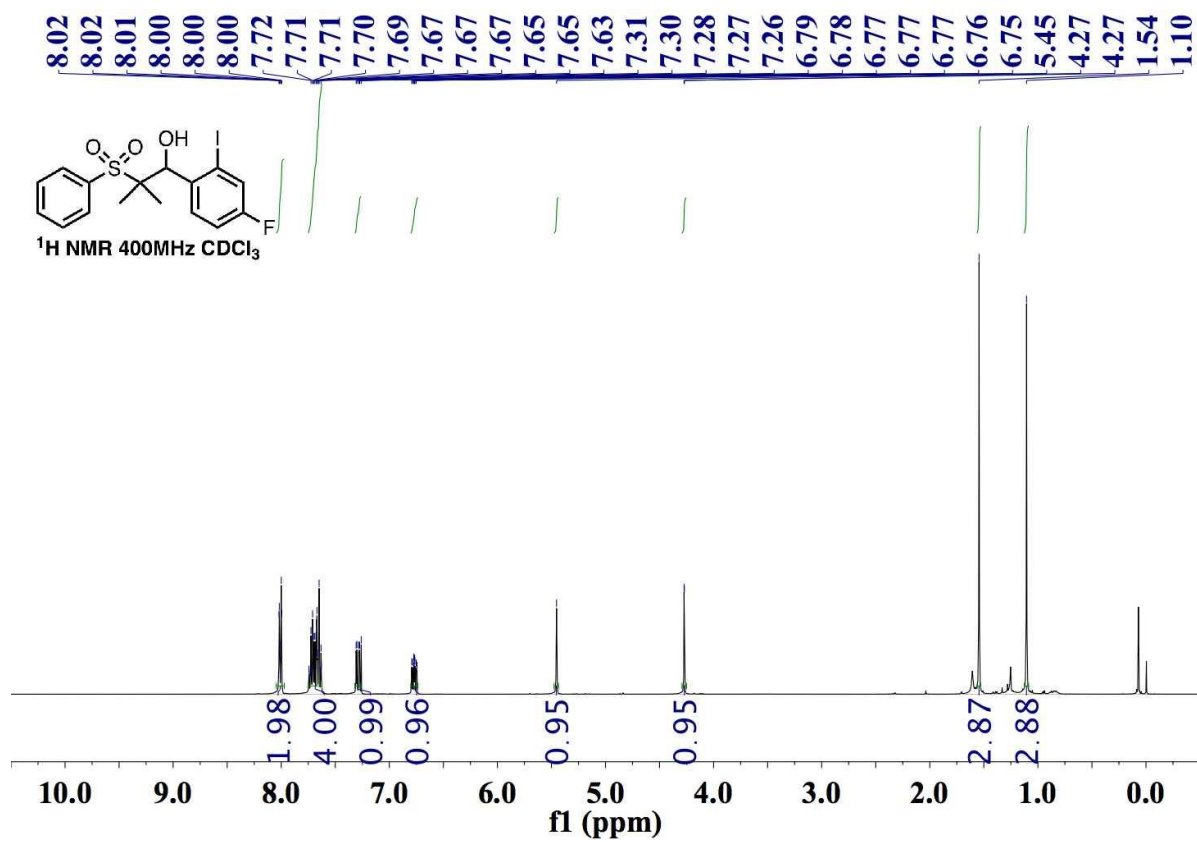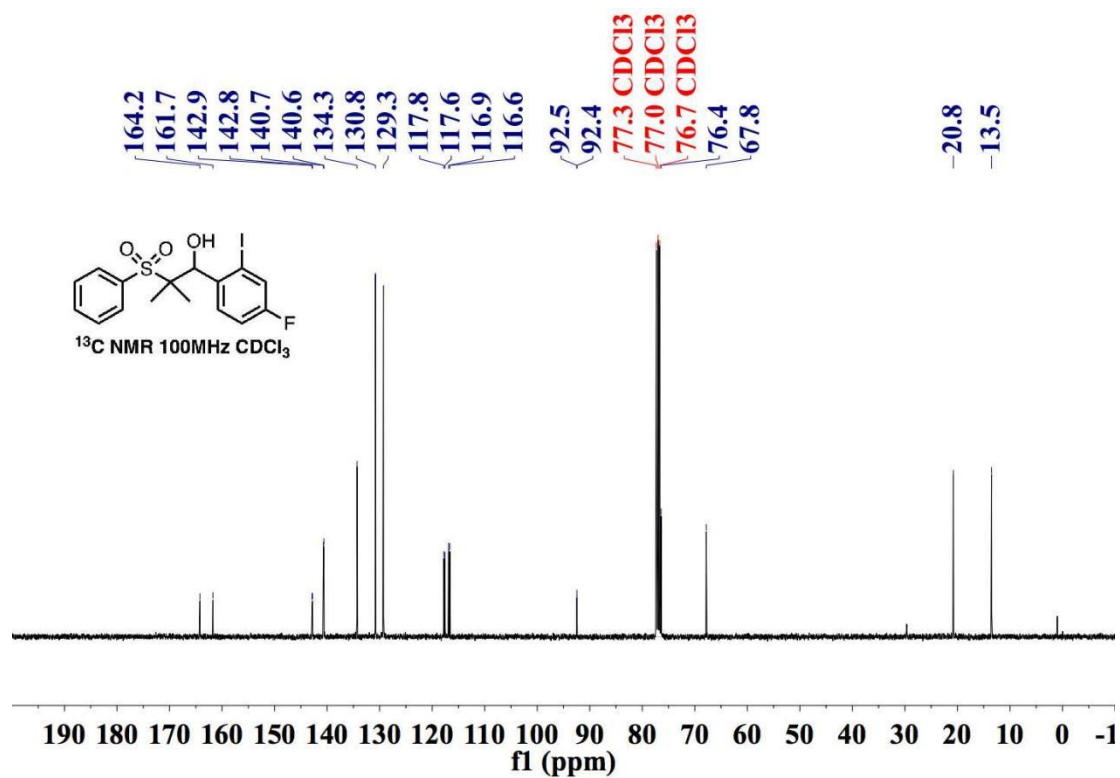

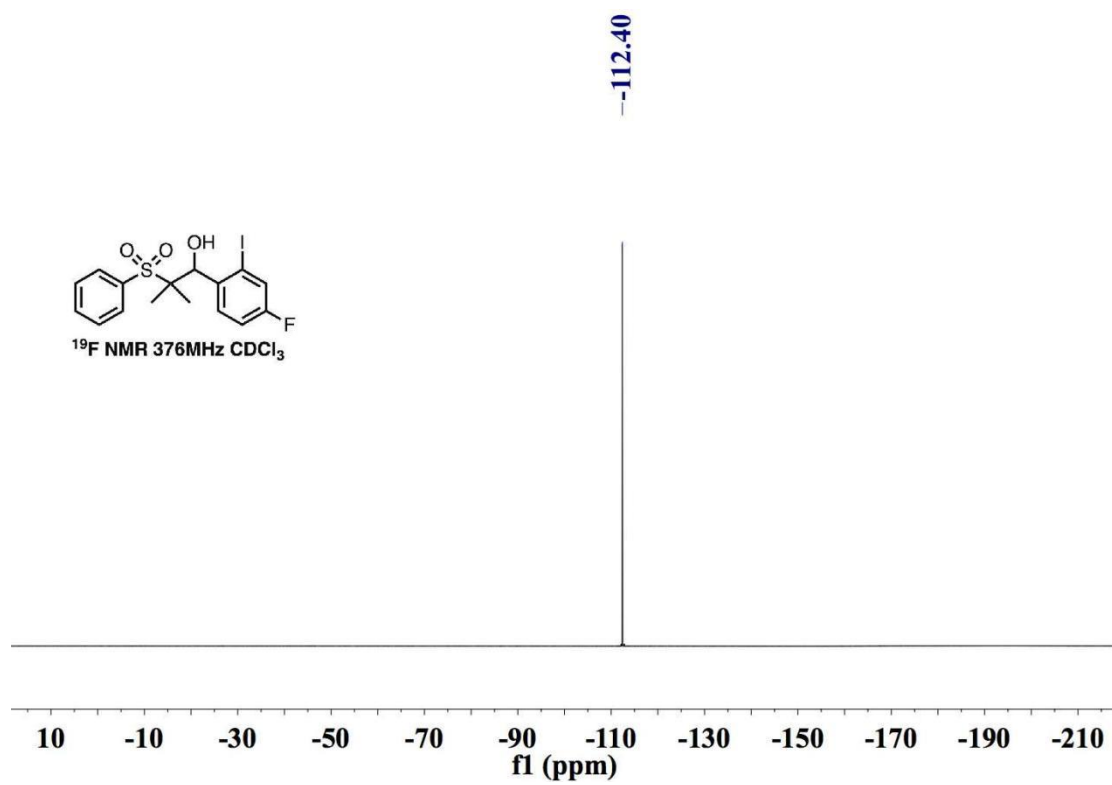

**2-Methyl-2-(phenylsulfonyl)-1-(pyridin-2-yl)propan-1-ol (2af):**

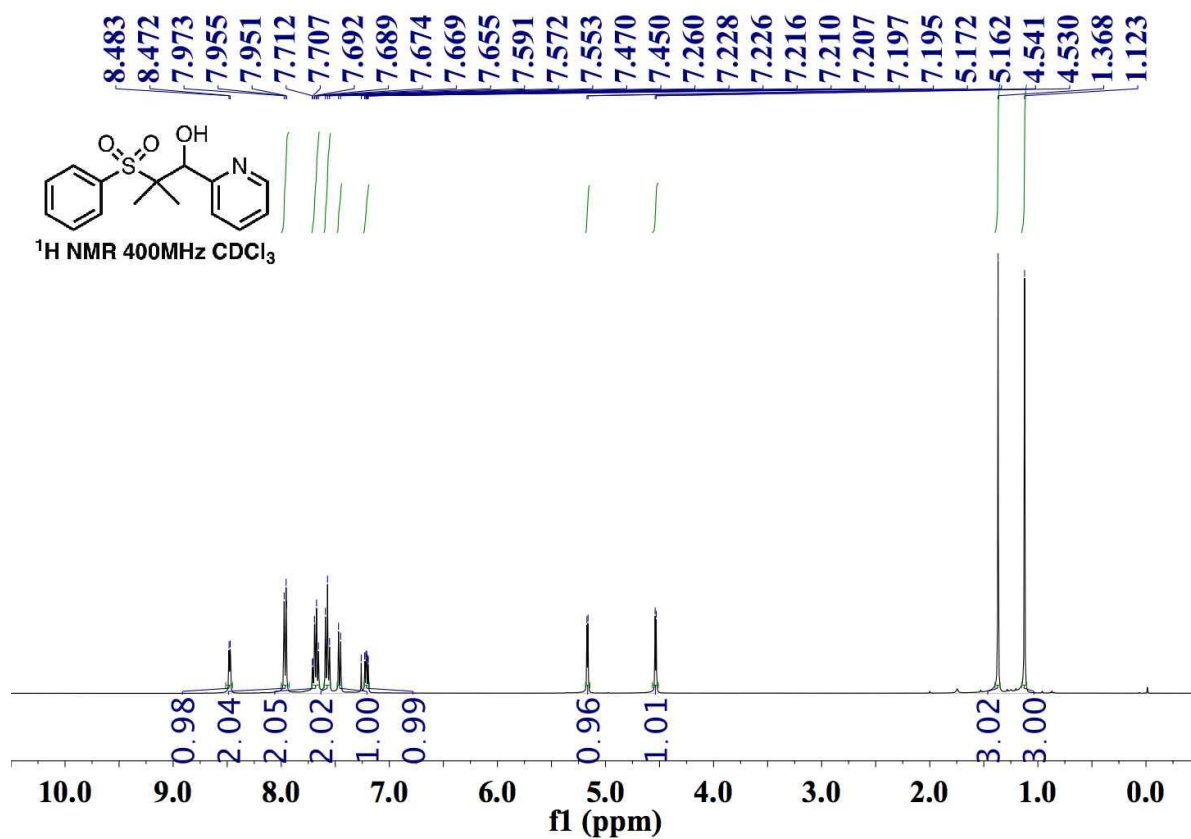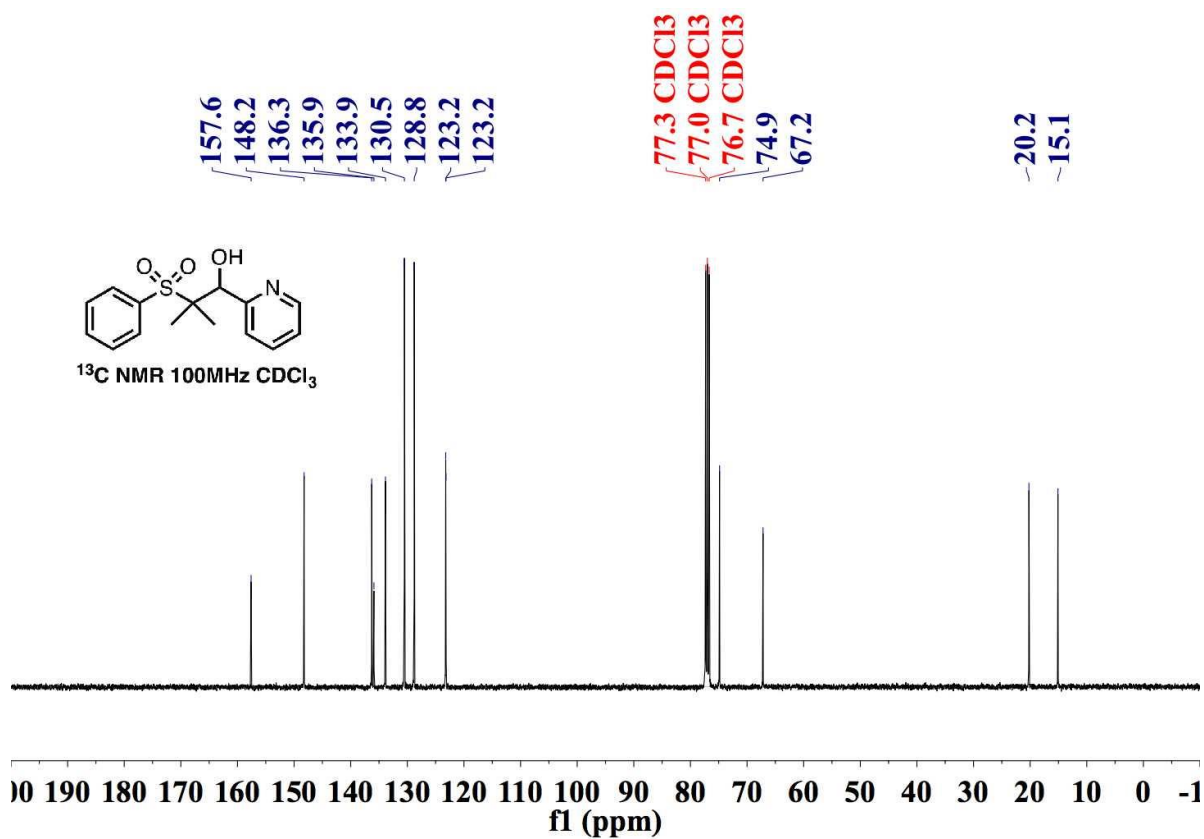

**2-Methyl-2-(phenylsulfonyl)-1-(thiophen-2-yl)propan-1-ol (2ag):**

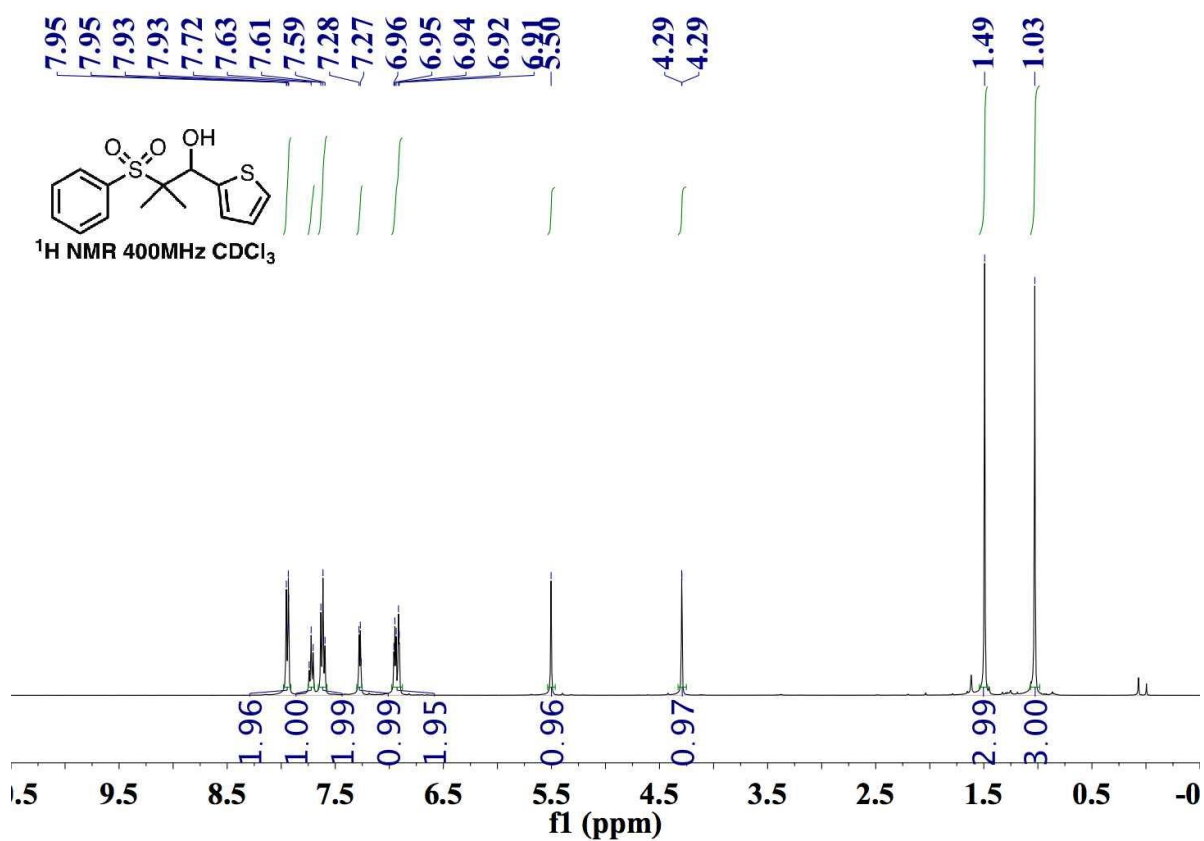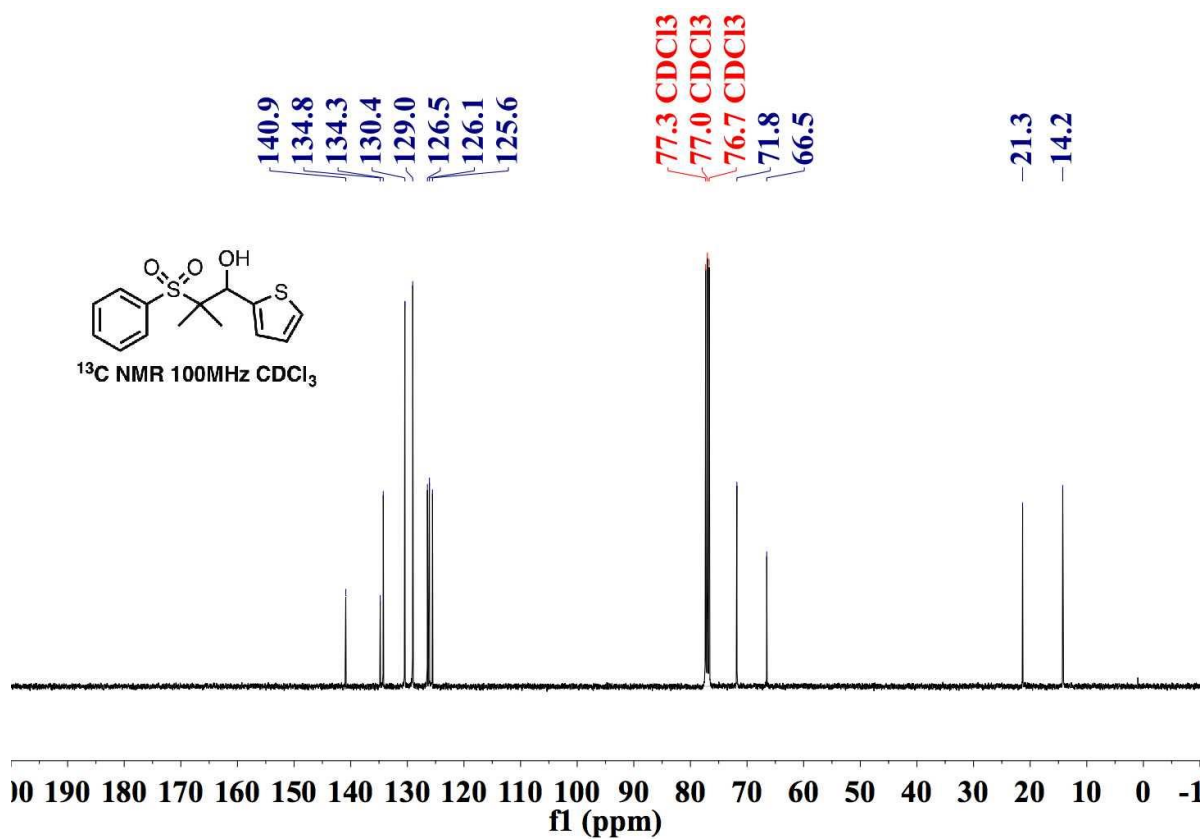

**2-Methyl-1-(naphthalen-1-yl)-2-(phenylsulfonyl)propan-1-ol (2ah):**

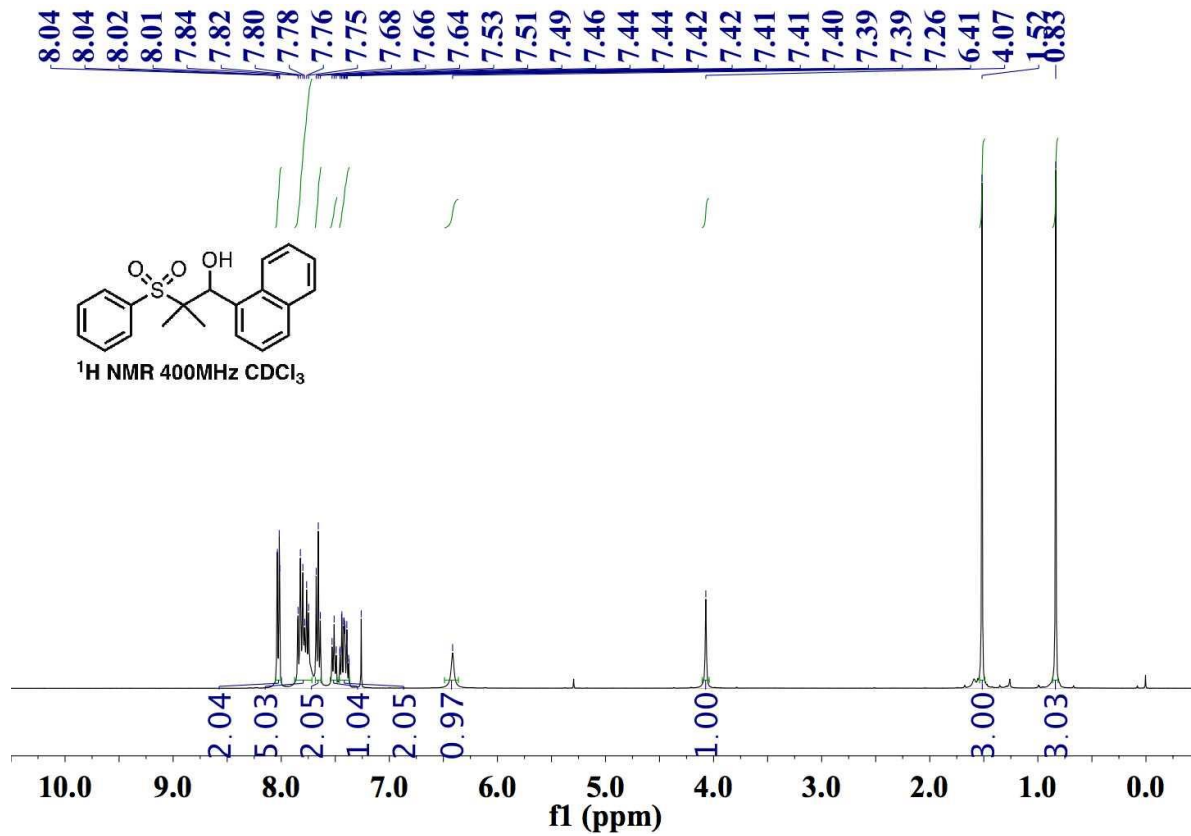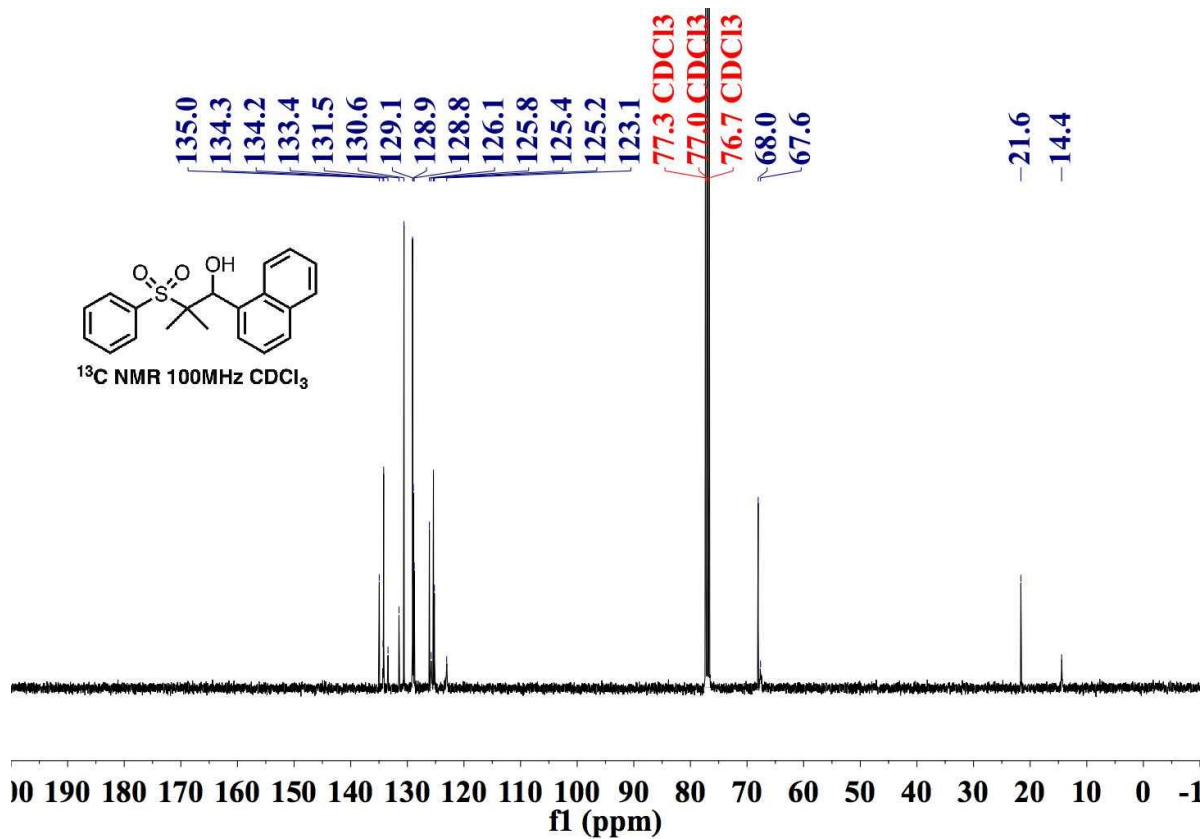

Phenyl(1-(phenylsulfonyl)cyclopentyl)methanol (2ai):

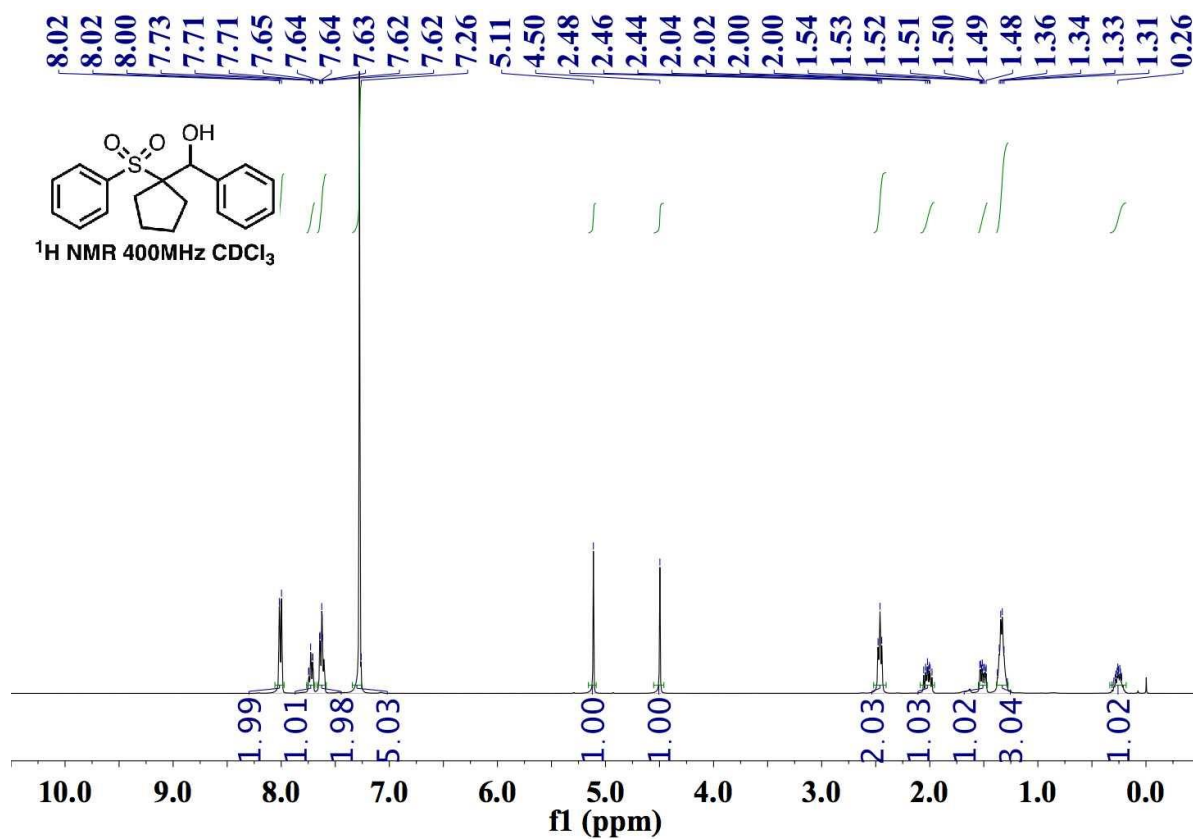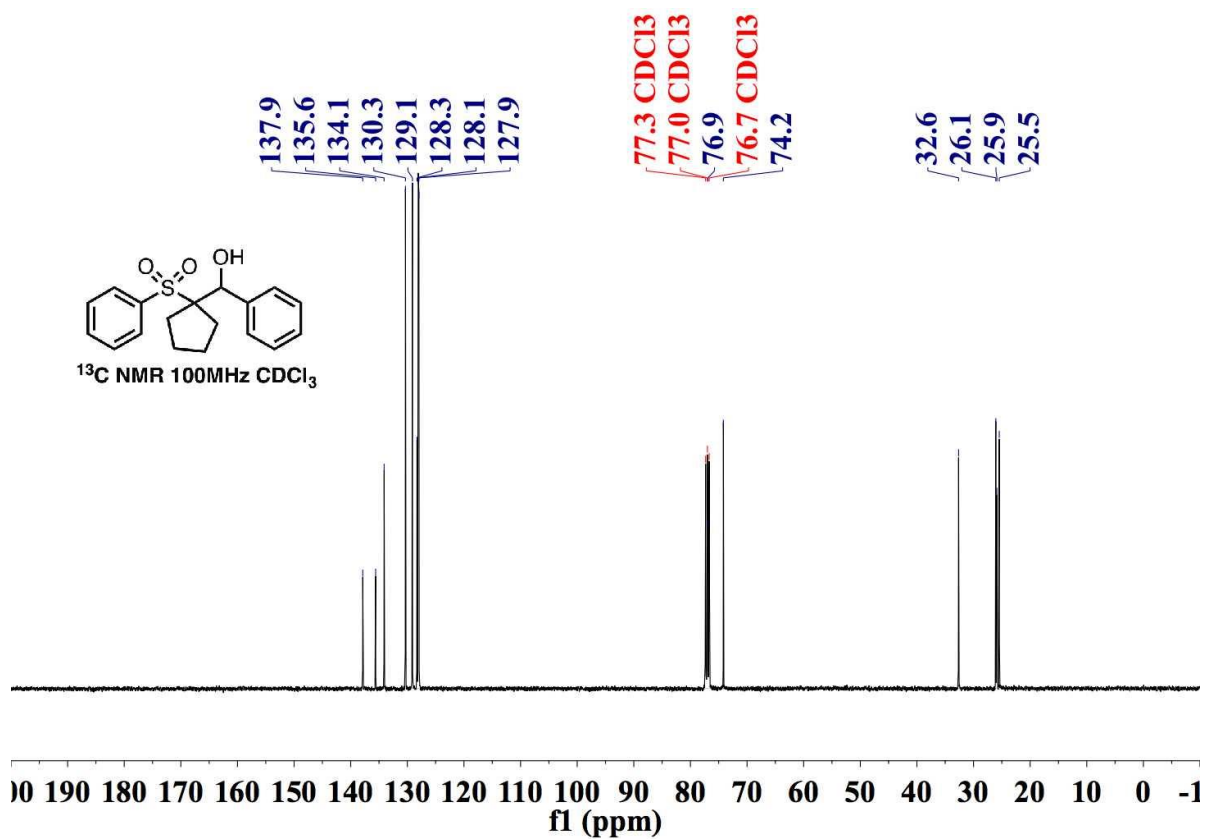

**1-([1,1'-Biphenyl]-2-yl)-2-methyl-2-(phenylsulfonyl)propan-1-ol (3a):**

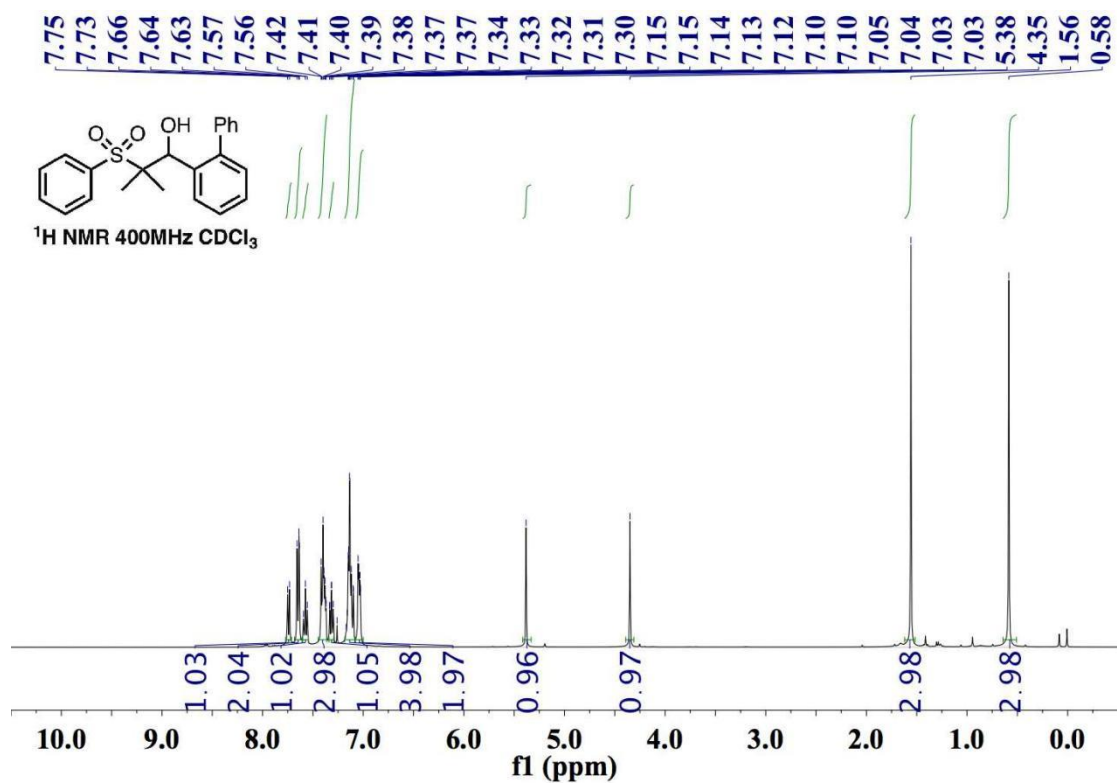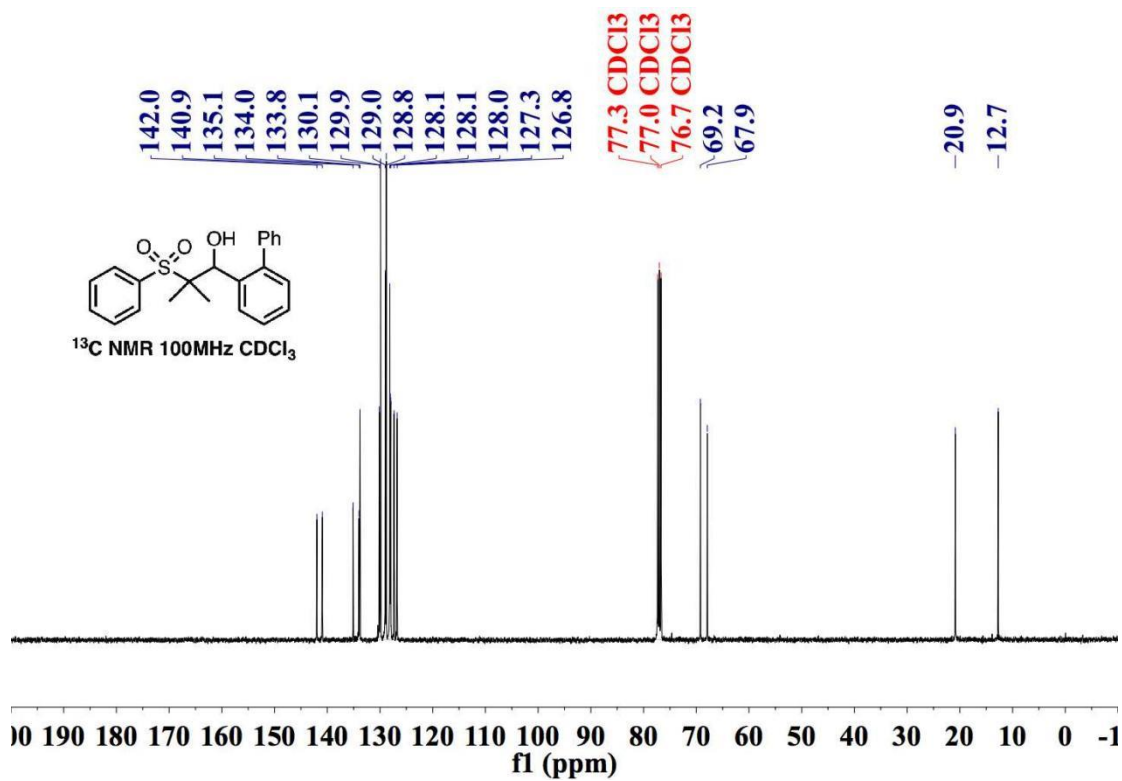

**1-(1-(Allyloxy)-2-methyl-2-(phenylsulfonyl)propyl)-2-bromobenzene (4a):**

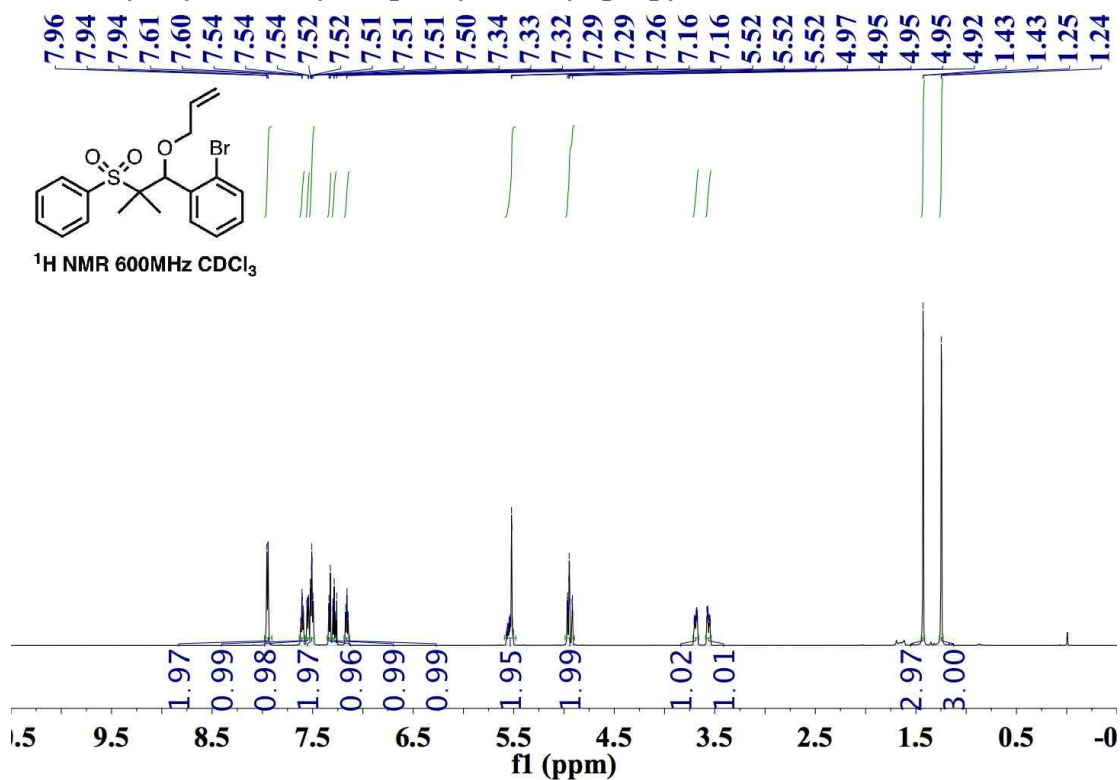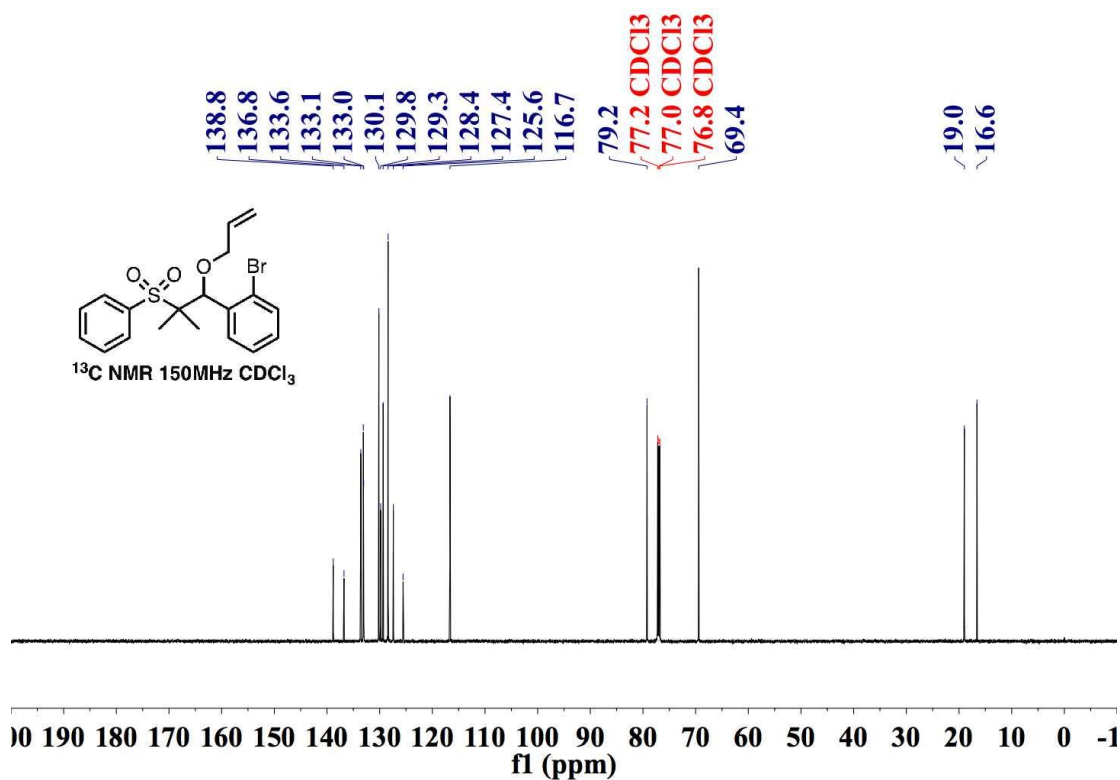



**4-Methylene-1-(2-(phenylsulfonyl)propan-2-yl)isochromane (5a):**

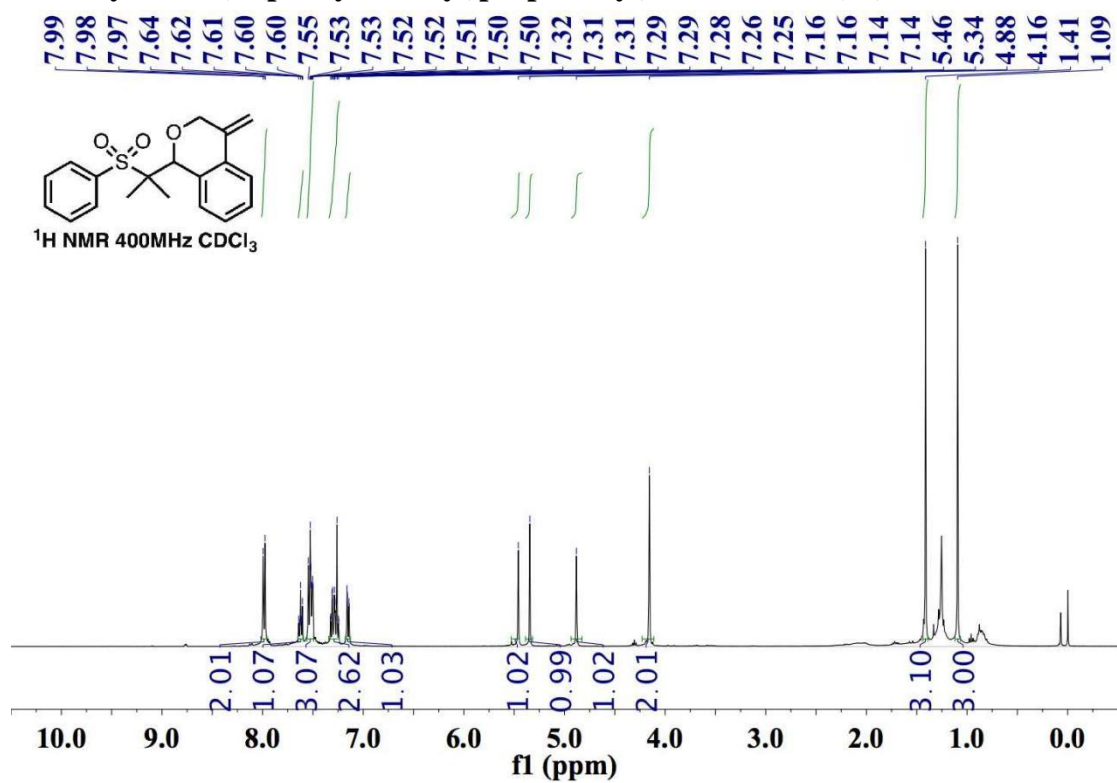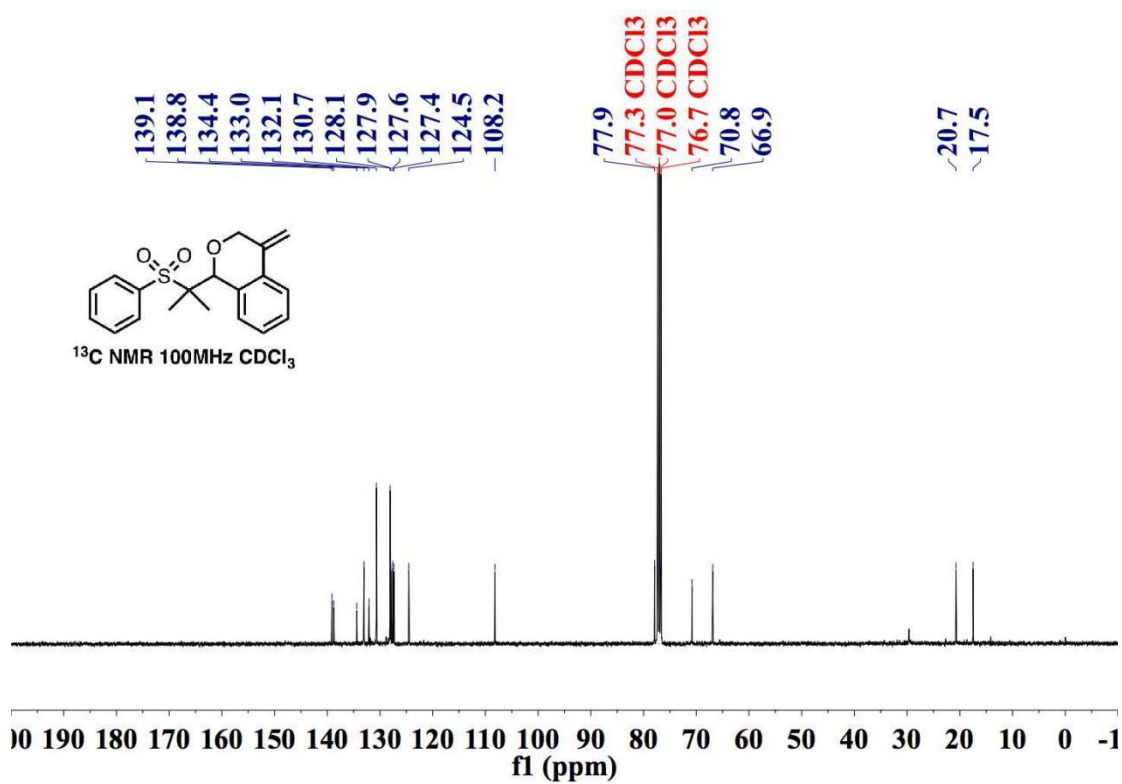

## 8. Copies of HPLC charts

### 1-(2-Bromophenyl)-2-methyl-2-(phenylsulfonyl)propan-1-ol (2a):

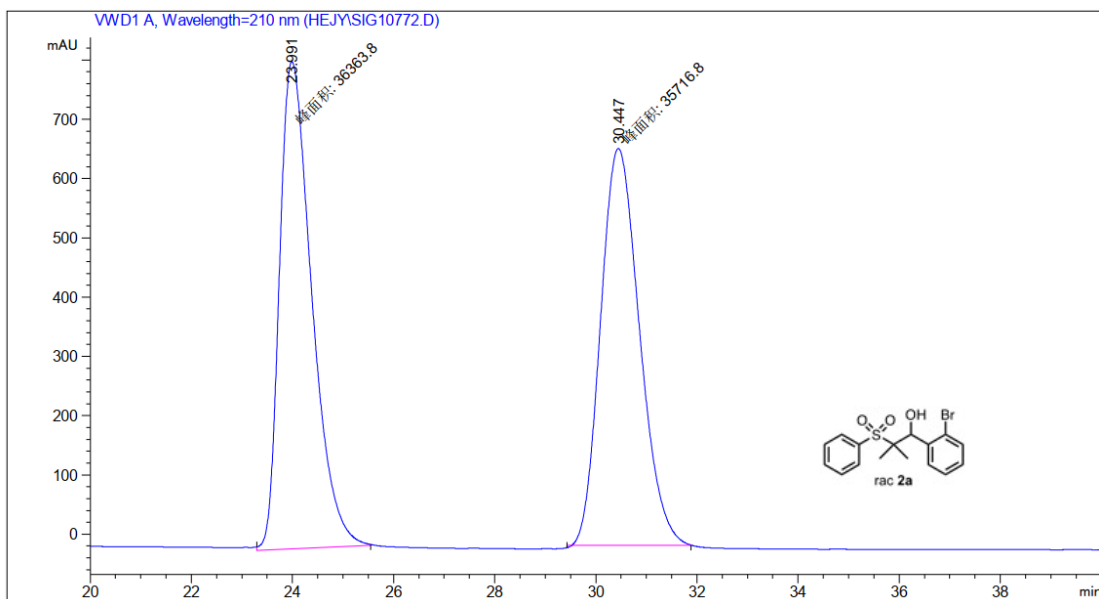

| # | [min]     | [min]  | [mAU*s]   | [mAU]     | %       |
|---|-----------|--------|-----------|-----------|---------|
| 1 | 23.991 MM | 0.7374 | 3.63638e4 | 821.91675 | 50.4488 |
| 2 | 30.447 MM | 0.8891 | 3.57168e4 | 669.56494 | 49.5512 |

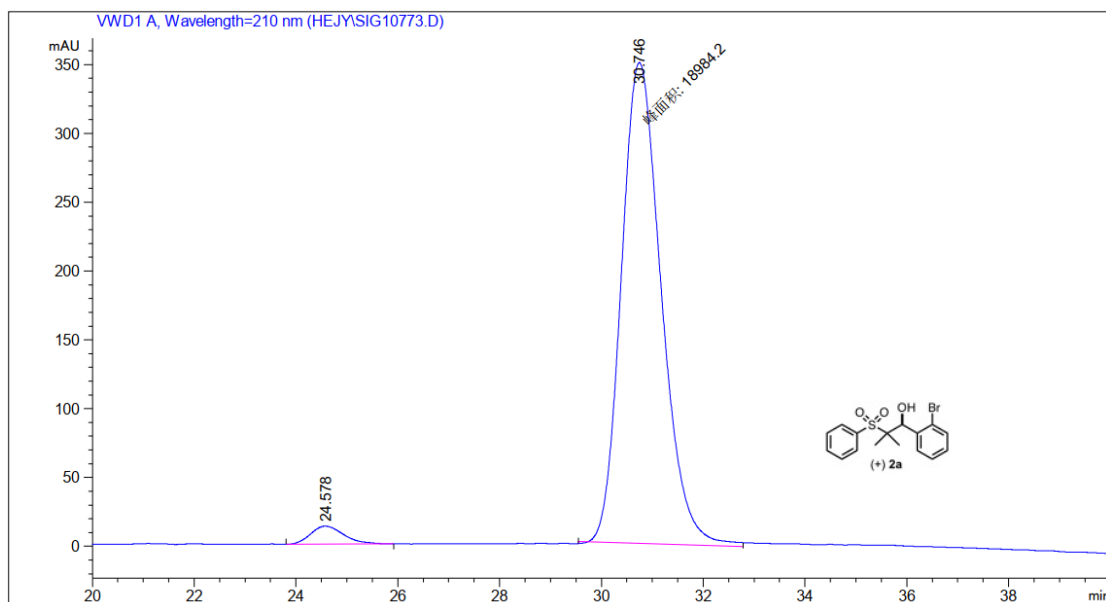

| # | [min]     | [min]  | [mAU*s]   | [mAU]     | %       |
|---|-----------|--------|-----------|-----------|---------|
| 1 | 24.578 BB | 0.6948 | 590.42316 | 13.02483  | 3.0163  |
| 2 | 30.746 MM | 0.9060 | 1.89842e4 | 349.21771 | 96.9837 |

### 1-(2-Bromophenyl)-2-methyl-2-tosylpropan-1-ol (2b):

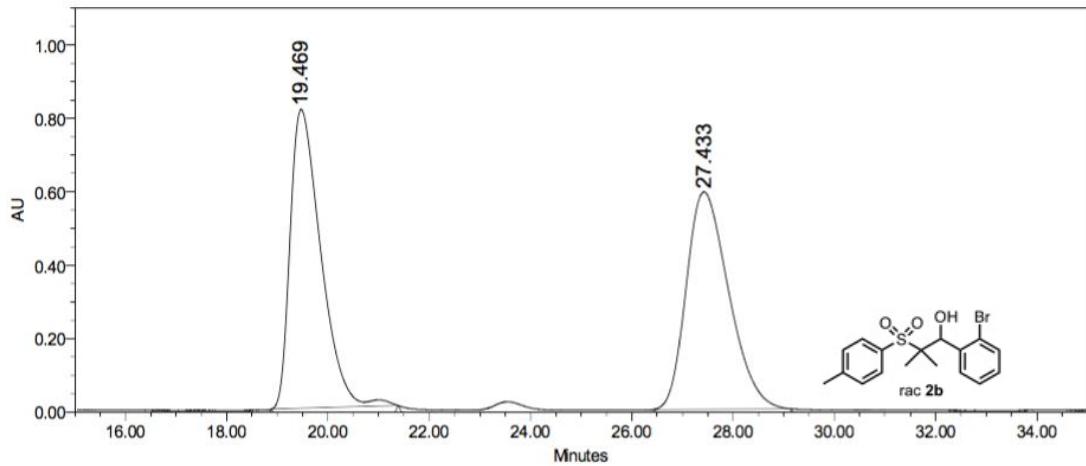

Channel: W2489 ChA; Processed Channel: W2489 ChA 215nm; Result Id: 3054; Processing Method: 3

**Processed Channel Descr.: W2489 ChA 215nm**

|   | Processed Channel Descr. | RT     | Area     | % Area | Height |
|---|--------------------------|--------|----------|--------|--------|
| 1 | W2489 ChA 215nm          | 19.469 | 34431871 | 50.01  | 815002 |
| 2 | W2489 ChA 215nm          | 27.433 | 34412489 | 49.99  | 591795 |

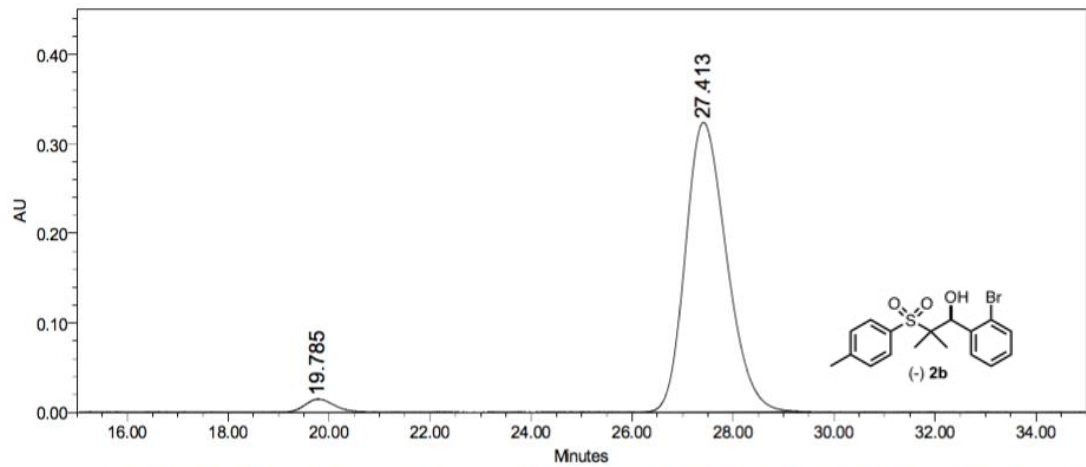

Channel: W2489 ChA; Processed Channel: W2489 ChA 215nm; Result Id: 3057; Processing Method: 6

**Processed Channel Descr.: W2489 ChA 215nm**

|   | Processed Channel Descr. | RT     | Area     | % Area | Height |
|---|--------------------------|--------|----------|--------|--------|
| 1 | W2489 ChA 215nm          | 19.785 | 550799   | 2.93   | 14262  |
| 2 | W2489 ChA 215nm          | 27.413 | 18266785 | 97.07  | 323409 |

**1-(2-Bromophenyl)-2-((4-(tert-butyl)phenyl)sulfonyl)-2-methylpropan-1-ol (2c):**

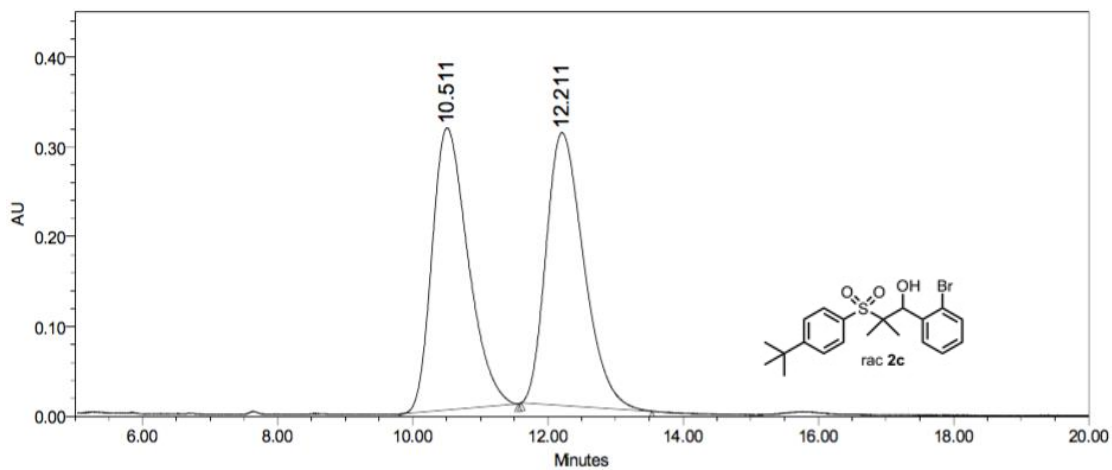

Channel: W2489 ChA; Processed Channel: W2489 ChA 215nm; Result Id: 3348; Processing Method: C

**Processed Channel Descr.: W2489 ChA 215nm**

|   | Processed Channel Descr. | RT     | Area     | % Area | Height |
|---|--------------------------|--------|----------|--------|--------|
| 1 | W2489 ChA 215nm          | 10.511 | 11597705 | 49.61  | 313837 |
| 2 | W2489 ChA 215nm          | 12.211 | 11778089 | 50.39  | 303643 |

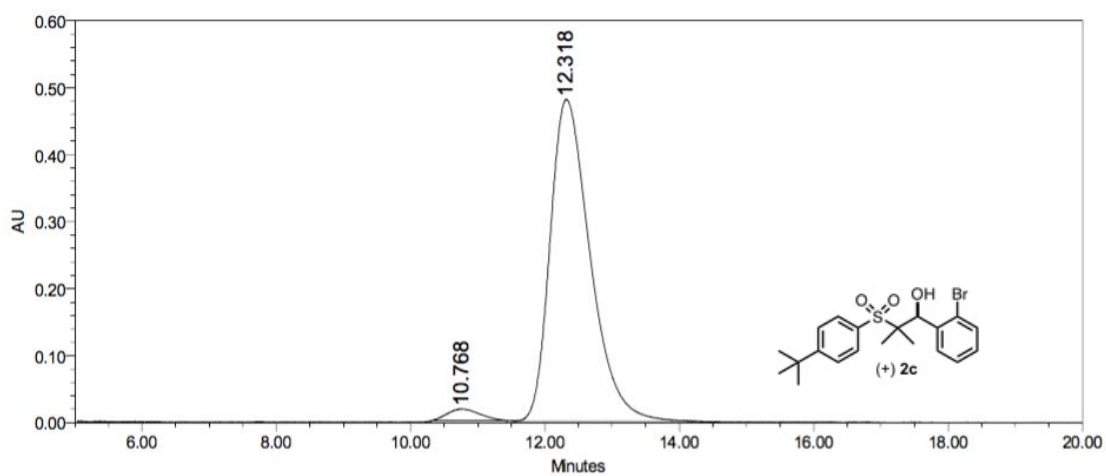

Channel: W2489 ChA; Processed Channel: W2489 ChA 215nm; Result Id: 3352; Processing Method: C

**Processed Channel Descr.: W2489 ChA 215nm**

|   | Processed Channel Descr. | RT     | Area     | % Area | Height |
|---|--------------------------|--------|----------|--------|--------|
| 1 | W2489 ChA 215nm          | 10.768 | 595498   | 2.91   | 17565  |
| 2 | W2489 ChA 215nm          | 12.318 | 19886615 | 97.09  | 480561 |

**1-(2-Bromophenyl)-2-((4-methoxyphenyl)sulfonyl)-2-methylpropan-1-ol (2d):**

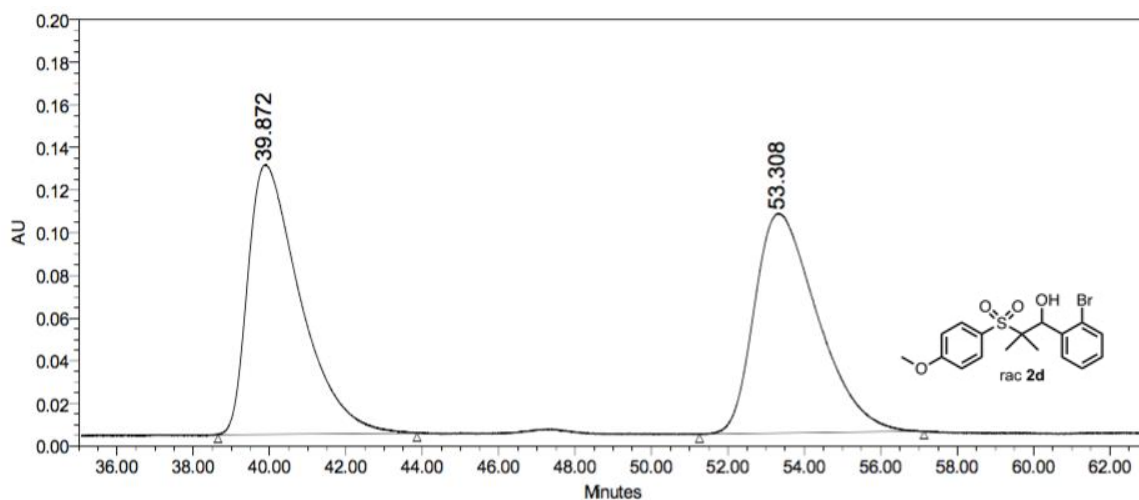

**Processed Channel Descr.: W2489 ChA 215nm**

|   | Processed Channel Descr. | RT     | Area     | % Area | Height |
|---|--------------------------|--------|----------|--------|--------|
| 1 | W2489 ChA 215nm          | 39.872 | 12040095 | 50.41  | 126422 |
| 2 | W2489 ChA 215nm          | 53.308 | 11843228 | 49.59  | 103006 |

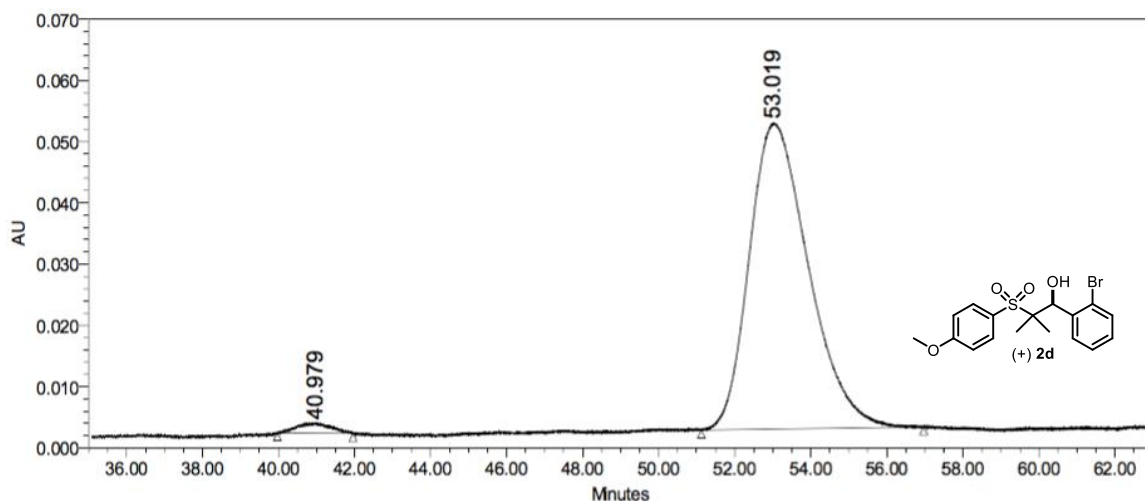

**Processed Channel Descr.: W2489 ChA 215nm**

|   | Processed Channel Descr. | RT     | Area    | % Area | Height |
|---|--------------------------|--------|---------|--------|--------|
| 1 | W2489 ChA 215nm          | 40.979 | 102118  | 1.85   | 1630   |
| 2 | W2489 ChA 215nm          | 53.019 | 5413041 | 98.15  | 50066  |

**1-(2-Bromophenyl)-2-((4-fluorophenyl)sulfonyl)-2-methylpropan-1-ol (2e):**

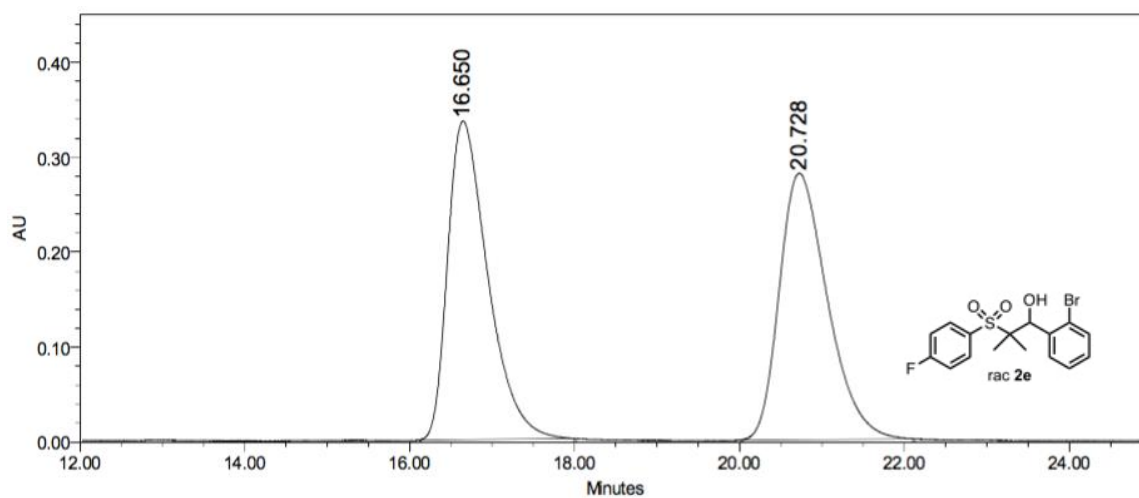

**Processed Channel Descr.: W2489 ChA 215nm**

|   | Processed Channel Descr. | RT     | Area     | % Area | Height |
|---|--------------------------|--------|----------|--------|--------|
| 1 | W2489 ChA 215nm          | 16.650 | 11335680 | 49.97  | 335207 |
| 2 | W2489 ChA 215nm          | 20.728 | 11348434 | 50.03  | 280193 |

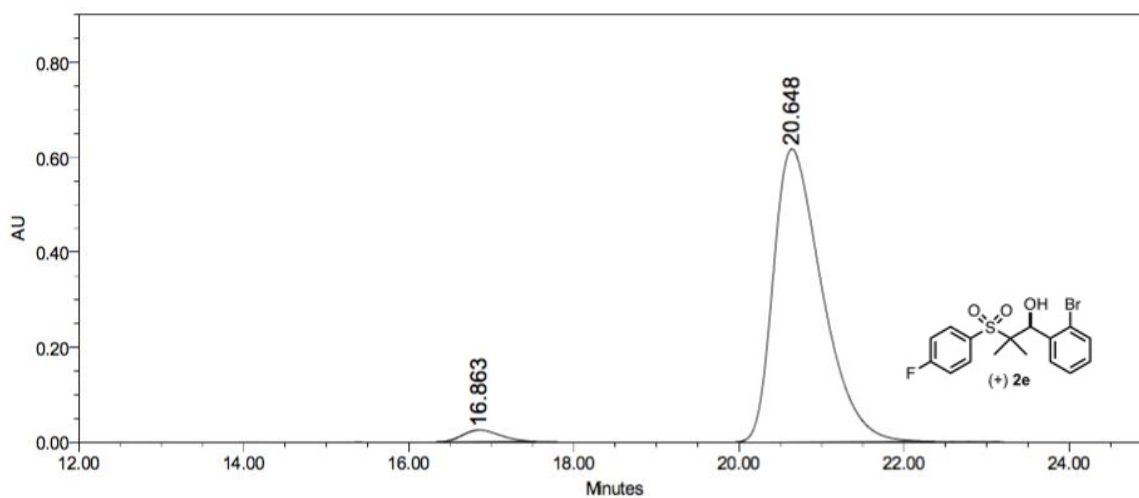

**Processed Channel Descr.: W2489 ChA 215nm**

|   | Processed Channel Descr. | RT     | Area     | % Area | Height |
|---|--------------------------|--------|----------|--------|--------|
| 1 | W2489 ChA 215nm          | 16.863 | 741968   | 2.86   | 24359  |
| 2 | W2489 ChA 215nm          | 20.648 | 25234554 | 97.14  | 616330 |

**1-(2-Bromophenyl)-2-methyl-2-((4-(trifluoromethyl)phenyl)sulfonyl)propan-1-ol**

**(2f):**

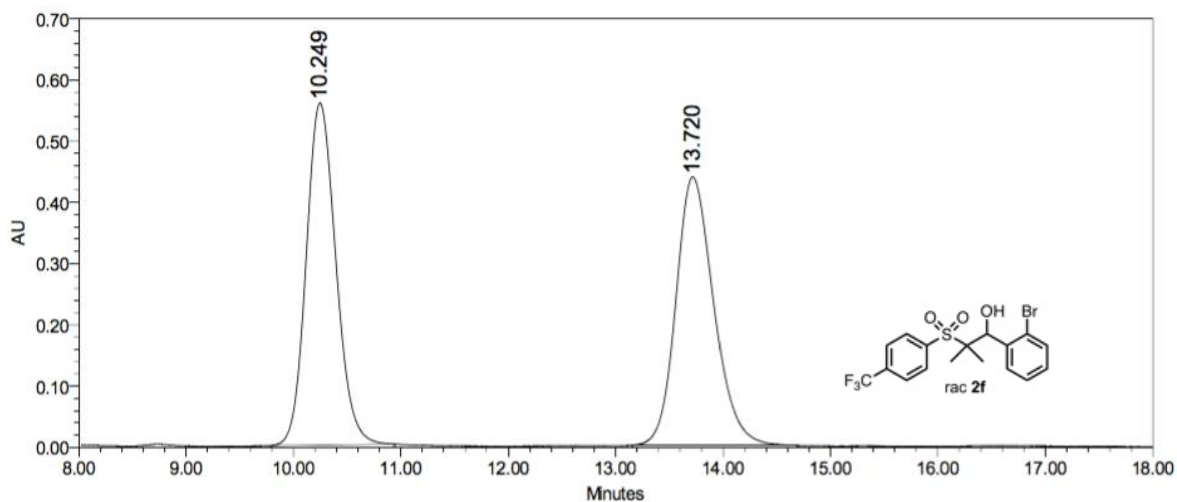

**Processed Channel Descr.: W2489 ChA 215nm**

|   | Processed Channel Descr. | RT     | Area     | % Area | Height |
|---|--------------------------|--------|----------|--------|--------|
| 1 | W2489 ChA 215nm          | 10.249 | 10731709 | 50.00  | 558820 |
| 2 | W2489 ChA 215nm          | 13.720 | 10733014 | 50.00  | 438158 |

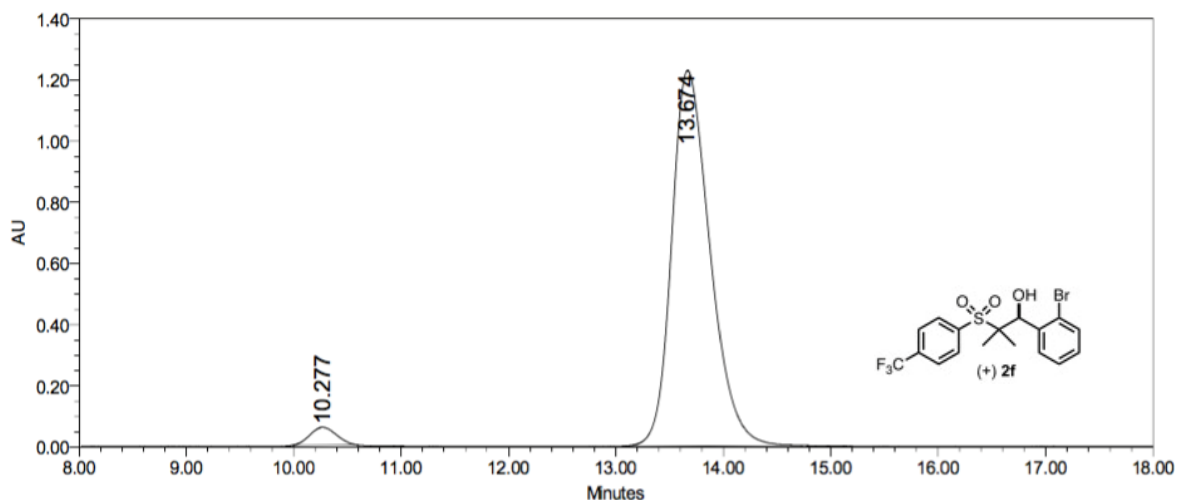

**Processed Channel Descr.: W2489 ChA 215nm**

|   | Processed Channel Descr. | RT     | Area     | % Area | Height  |
|---|--------------------------|--------|----------|--------|---------|
| 1 | W2489 ChA 215nm          | 10.277 | 992743   | 3.16   | 57969   |
| 2 | W2489 ChA 215nm          | 13.674 | 30411358 | 96.84  | 1227860 |

**1-(2-Bromophenyl)-2-methyl-2-((4-nitrophenyl)sulfonyl)-propan-1-ol (2g):**

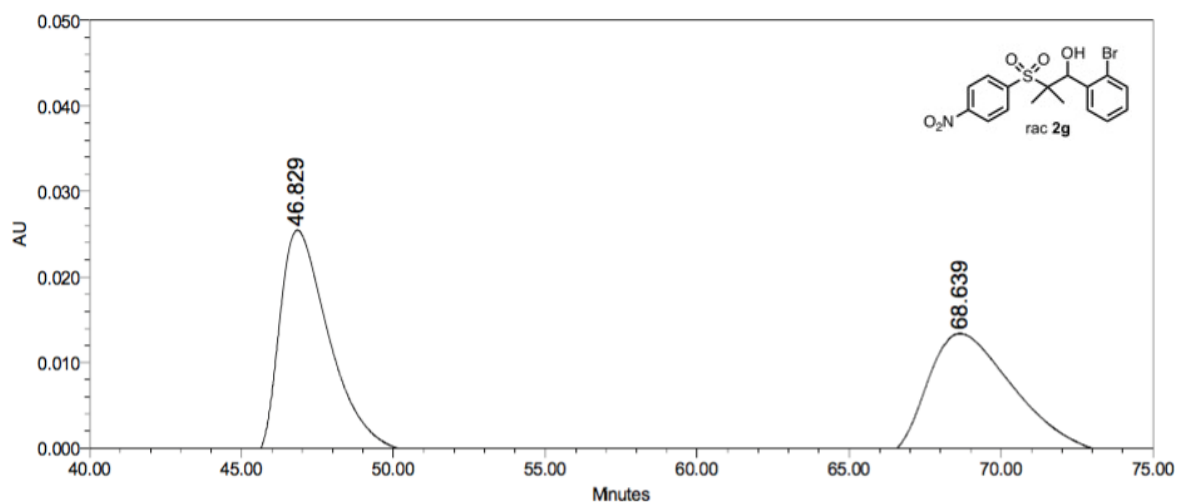

**Processed Channel Descr.: W2489 ChA 215nm**

|   | Processed Channel Descr. | RT     | Area    | % Area | Height |
|---|--------------------------|--------|---------|--------|--------|
| 1 | W2489 ChA 215nm          | 46.829 | 3158488 | 50.01  | 26655  |
| 2 | W2489 ChA 215nm          | 68.639 | 3156731 | 49.99  | 14842  |

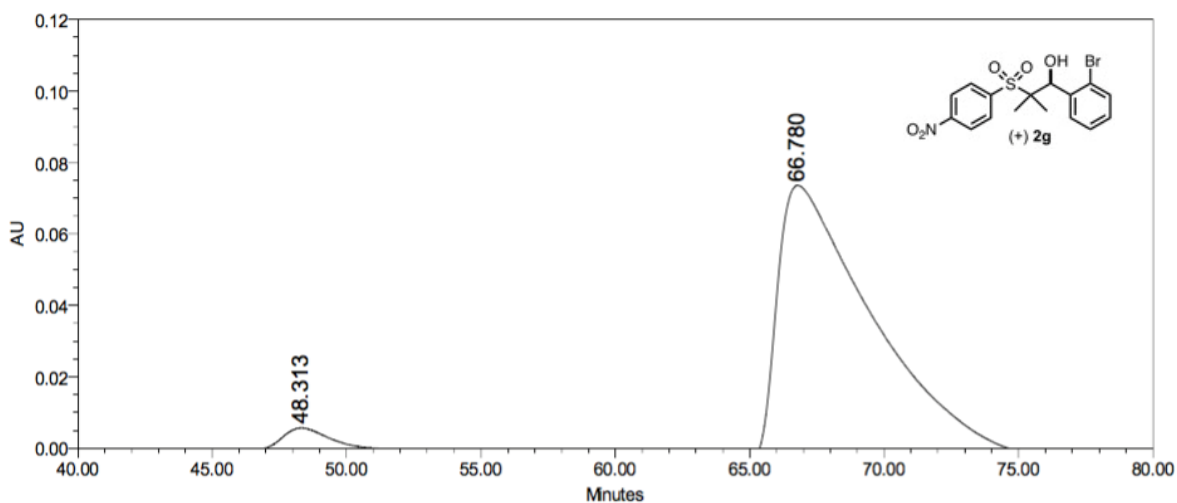

**Processed Channel Descr.: W2489 ChA 215nm**

|   | Processed Channel Descr. | RT     | Area     | % Area | Height |
|---|--------------------------|--------|----------|--------|--------|
| 1 | W2489 ChA 215nm          | 48.313 | 622742   | 3.03   | 5671   |
| 2 | W2489 ChA 215nm          | 66.780 | 19956232 | 96.97  | 77713  |



**1-(2-Bromophenyl)-2-((2-bromophenyl)sulfonyl)-2-methylpropan-1-ol (2h):**

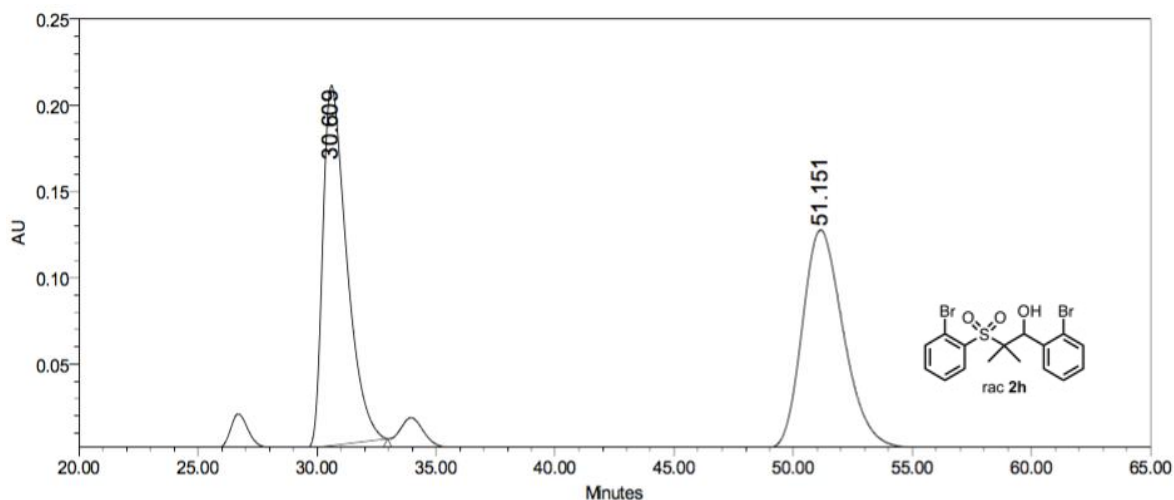

Channel: W2489 ChA; Processed Channel: W2489 ChA 215nm; Result Id: 3756; Processing Method: C

**Processed Channel Descr.: W2489 ChA 215nm**

|   | Processed Channel Descr. | RT     | Area     | % Area | Height |
|---|--------------------------|--------|----------|--------|--------|
| 1 | W2489 ChA 215nm          | 30.609 | 14610360 | 48.91  | 208750 |
| 2 | W2489 ChA 215nm          | 51.151 | 15262476 | 51.09  | 126860 |

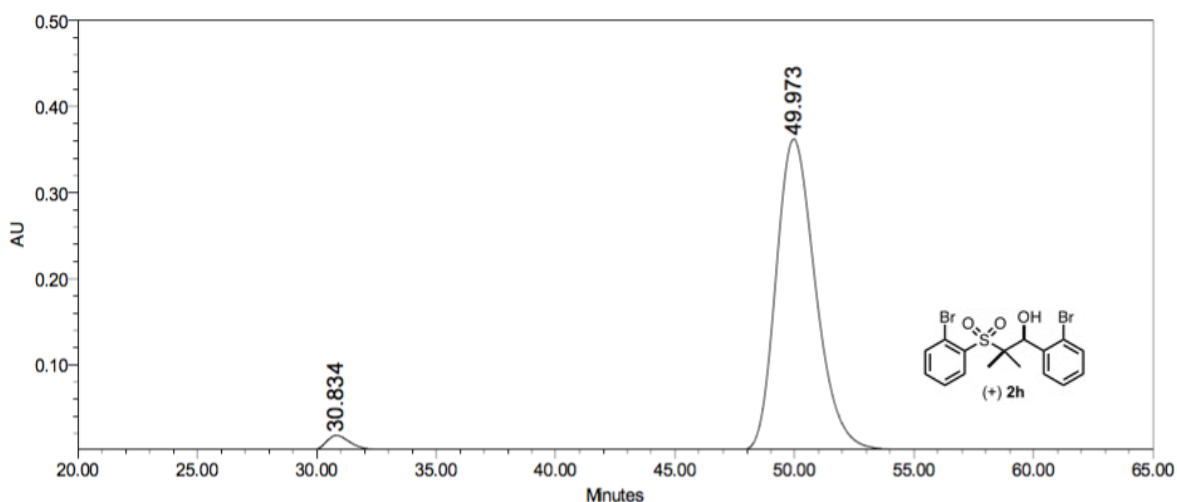

Channel: W2489 ChA; Processed Channel: W2489 ChA 215nm; Result Id: 3766; Processing Method: C

**Processed Channel Descr.: W2489 ChA 215nm**

|   | Processed Channel Descr. | RT     | Area     | % Area | Height |
|---|--------------------------|--------|----------|--------|--------|
| 1 | W2489 ChA 215nm          | 30.834 | 1136549  | 2.64   | 16896  |
| 2 | W2489 ChA 215nm          | 49.973 | 41989099 | 97.36  | 362892 |

**1-(2-Bromophenyl)-2-((3-fluorophenyl)sulfonyl)-2-methylpropan-1-ol (2i):**

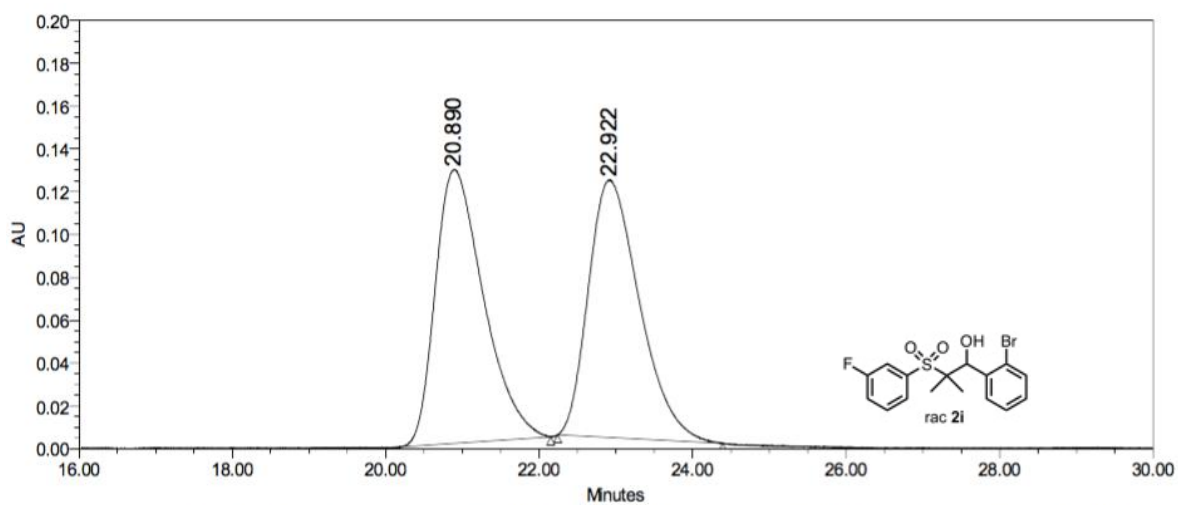

Channel: W2489 ChA; Processed Channel: W2489 ChA 215nm; Result Id: 3370; Processing Method: C

**Processed Channel Descr.: W2489 ChA 215nm**

|   | Processed Channel Descr. | RT     | Area    | % Area | Height |
|---|--------------------------|--------|---------|--------|--------|
| 1 | W2489 ChA 215nm          | 20.890 | 5582411 | 50.05  | 127883 |
| 2 | W2489 ChA 215nm          | 22.922 | 5571839 | 49.95  | 120354 |

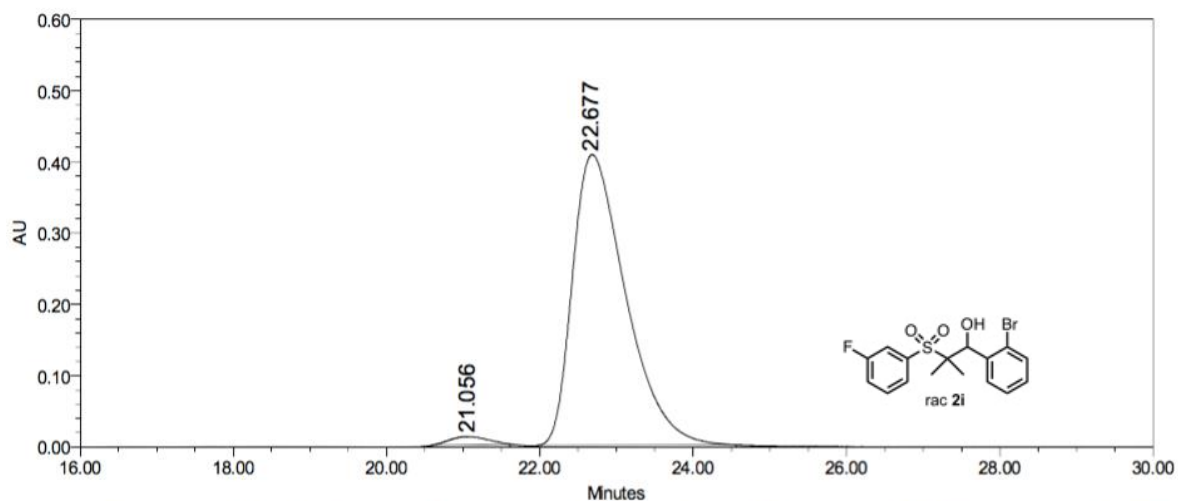

Channel: W2489 ChA; Processed Channel: W2489 ChA 215nm; Result Id: 3367; Processing Method: C

**Processed Channel Descr.: W2489 ChA 215nm**

|   | Processed Channel Descr. | RT     | Area     | % Area | Height |
|---|--------------------------|--------|----------|--------|--------|
| 1 | W2489 ChA 215nm          | 21.056 | 397422   | 1.98   | 11620  |
| 2 | W2489 ChA 215nm          | 22.677 | 19699977 | 98.02  | 408057 |

**1-(2-Bromophenyl)-2-methyl-2-(naphthalen-2-ylsulfonyl)propan-1-ol (2j):**

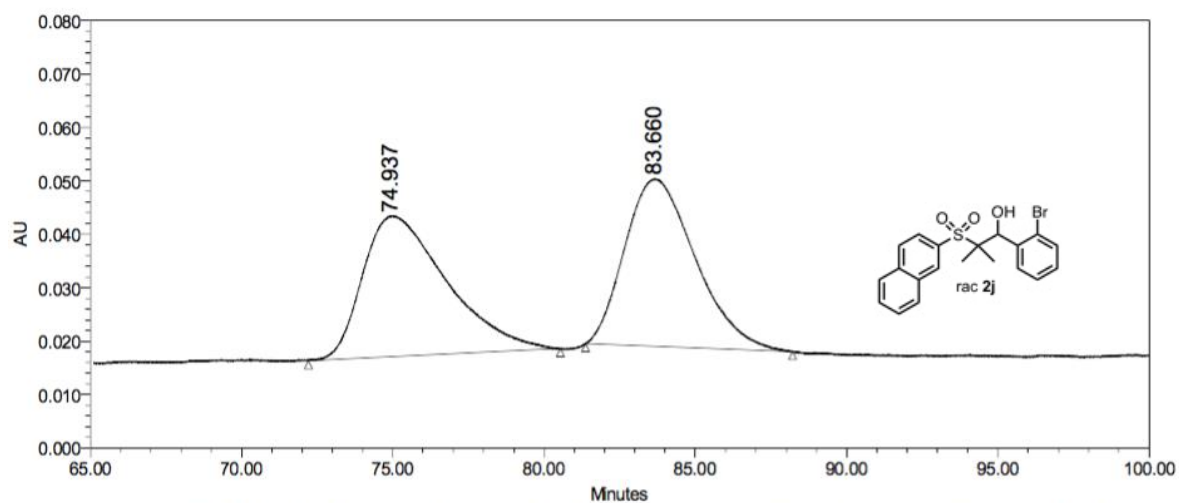

**Processed Channel Descr.: W2489 ChA 215nm**

|   | Processed Channel Descr. | RT     | Area    | % Area | Height |
|---|--------------------------|--------|---------|--------|--------|
| 1 | W2489 ChA 215nm          | 74.937 | 5061095 | 49.89  | 26312  |
| 2 | W2489 ChA 215nm          | 83.660 | 5084042 | 50.11  | 31355  |

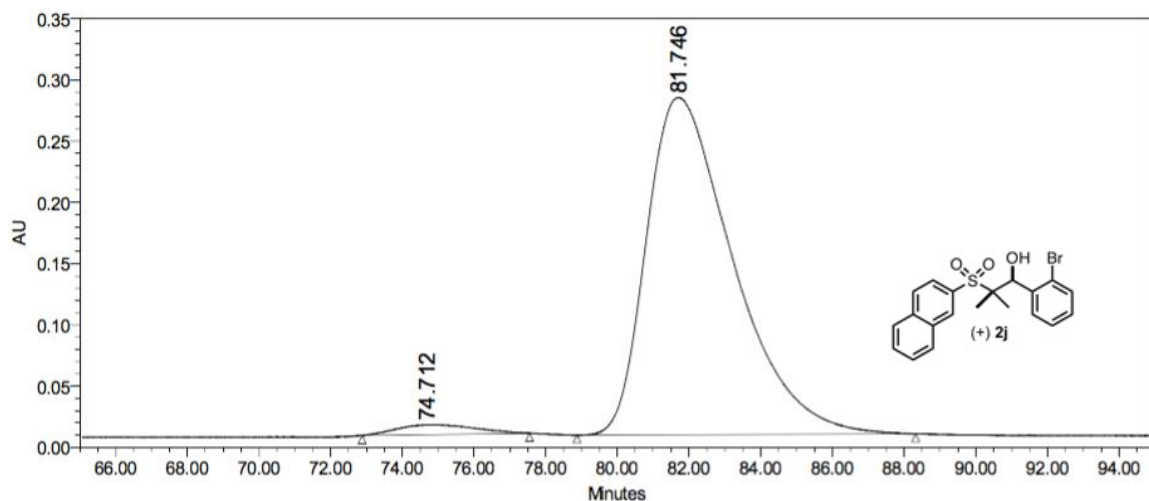

**Processed Channel Descr.: W2489 ChA 215nm**

|   | Processed Channel Descr. | RT     | Area     | % Area | Height |
|---|--------------------------|--------|----------|--------|--------|
| 1 | W2489 ChA 215nm          | 74.712 | 1201530  | 2.53   | 8040   |
| 2 | W2489 ChA 215nm          | 81.746 | 46214495 | 97.47  | 275489 |

**1-(2-Bromophenyl)-2-methyl-2-(pyridin-3-ylsulfonyl)propan-1-ol (2k):**

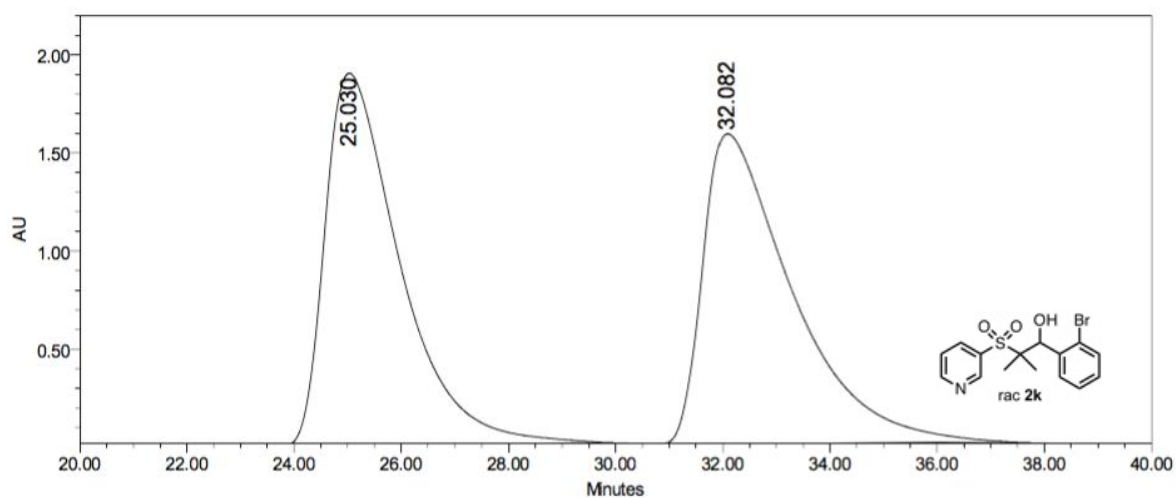

**Processed Channel Descr.: W2489 ChA 215nm**

|   | Processed Channel Descr. | RT     | Area      | % Area | Height  |
|---|--------------------------|--------|-----------|--------|---------|
| 1 | W2489 ChA 215nm          | 25.030 | 182989389 | 50.10  | 1896866 |
| 2 | W2489 ChA 215nm          | 32.082 | 182266093 | 49.90  | 1582068 |

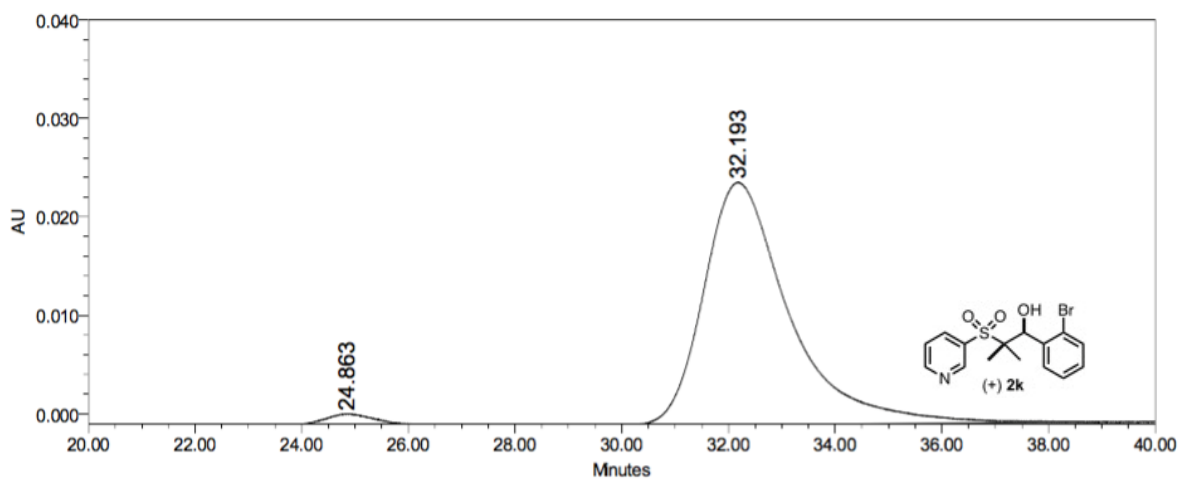

**Processed Channel Descr.: W2489 ChA 215nm**

|   | Processed Channel Descr. | RT     | Area    | % Area | Height |
|---|--------------------------|--------|---------|--------|--------|
| 1 | W2489 ChA 215nm          | 24.863 | 69487   | 2.49   | 1141   |
| 2 | W2489 ChA 215nm          | 32.193 | 2724568 | 97.51  | 24591  |

**1-(2-Bromophenyl)-2-methyl-2-(thiophen-2-ylsulfonyl)propan-1-ol (2I):**

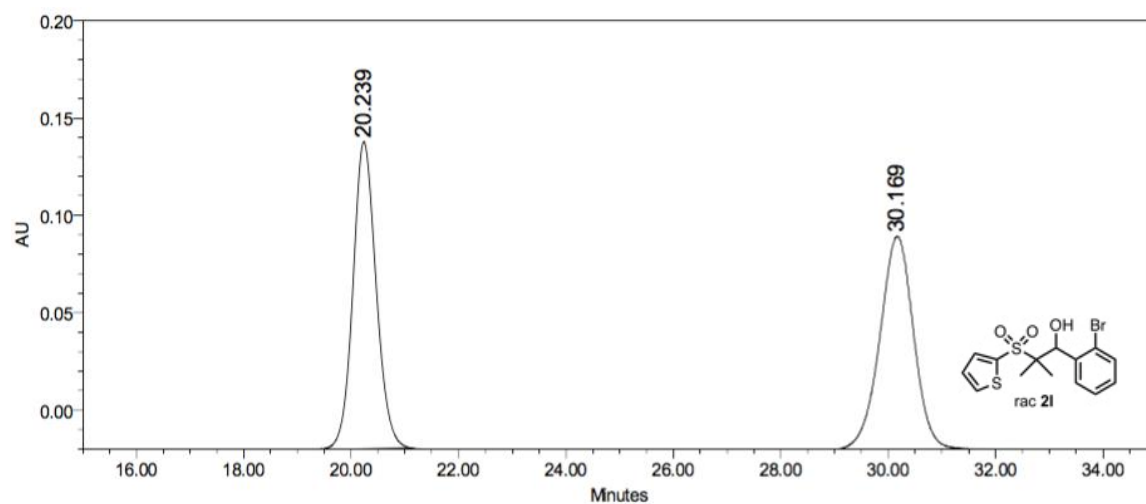

**Processed Channel Descr.: W2489 ChA 215nm**

|   | Processed Channel Descr. | RT     | Area    | % Area | Height |
|---|--------------------------|--------|---------|--------|--------|
| 1 | W2489 ChA 215nm          | 20.239 | 4718100 | 49.72  | 157721 |
| 2 | W2489 ChA 215nm          | 30.169 | 4771213 | 50.28  | 109507 |

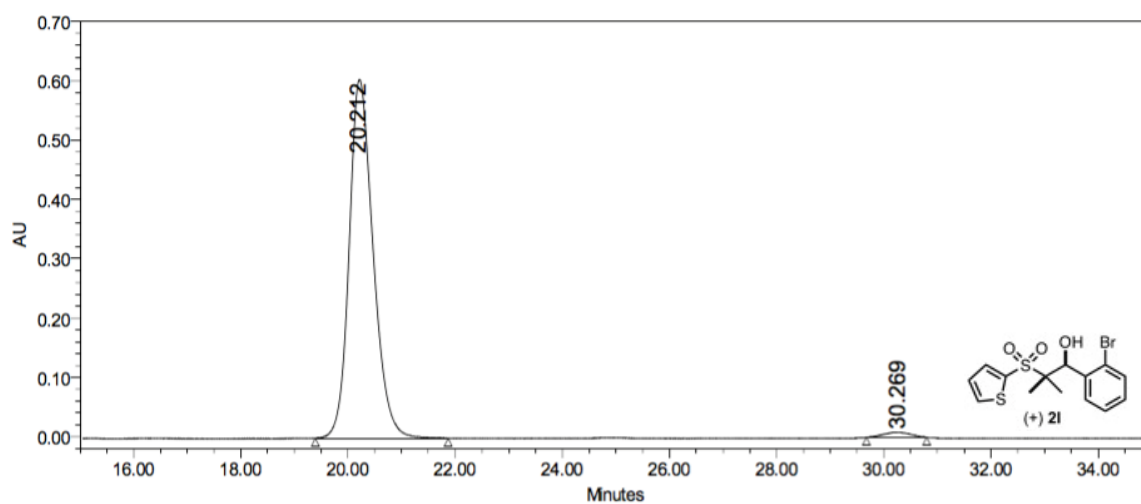

**Processed Channel Descr.: W2489 ChA 215nm**

|   | Processed Channel Descr. | RT     | Area     | % Area | Height |
|---|--------------------------|--------|----------|--------|--------|
| 1 | W2489 ChA 215nm          | 20.212 | 18801989 | 98.44  | 604907 |
| 2 | W2489 ChA 215nm          | 30.269 | 297908   | 1.56   | 8498   |

**1-(2-Bromophenyl)-2-methyl-2-(methylsulfonyl)propan-1-ol (2m):**

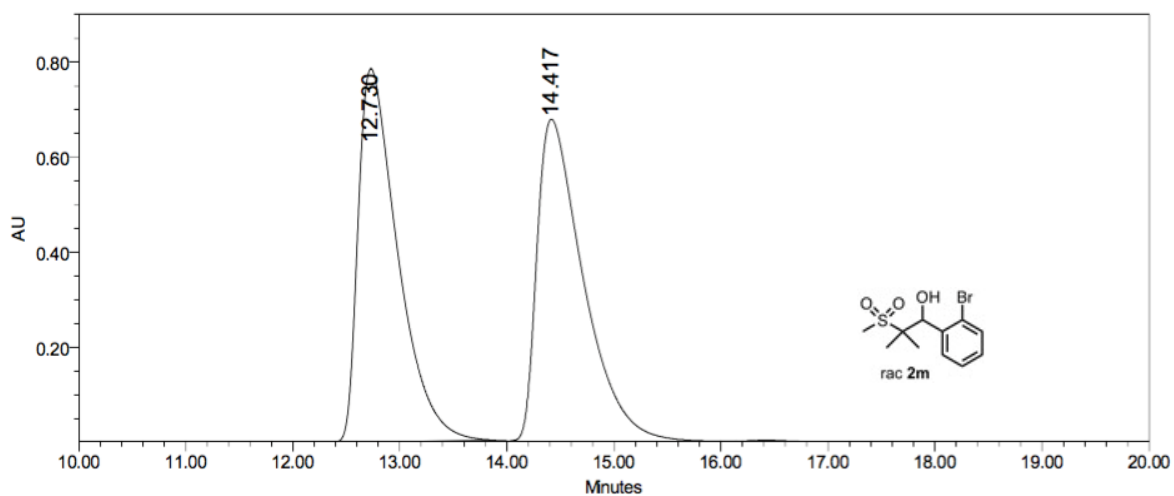

**Processed Channel Descr.: W2489 ChA 215nm**

|   | Processed Channel Descr. | RT     | Area     | % Area | Height |
|---|--------------------------|--------|----------|--------|--------|
| 1 | W2489 ChA 215nm          | 12.730 | 20126291 | 49.87  | 784677 |
| 2 | W2489 ChA 215nm          | 14.417 | 20232635 | 50.13  | 676305 |

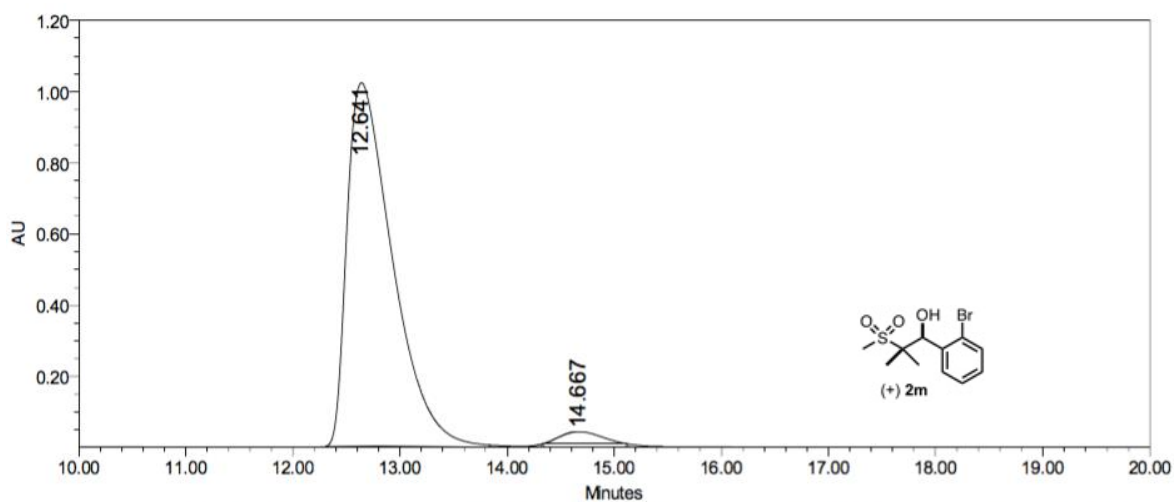

**Processed Channel Descr.: W2489 ChA 215nm**

|   | Processed Channel Descr. | RT     | Area     | % Area | Height  |
|---|--------------------------|--------|----------|--------|---------|
| 1 | W2489 ChA 215nm          | 12.641 | 29878101 | 97.08  | 1020274 |
| 2 | W2489 ChA 215nm          | 14.667 | 899941   | 2.92   | 34418   |

**(2-Bromophenyl)(1-(phenylsulfonyl)cyclopentyl)methanol (2n):**

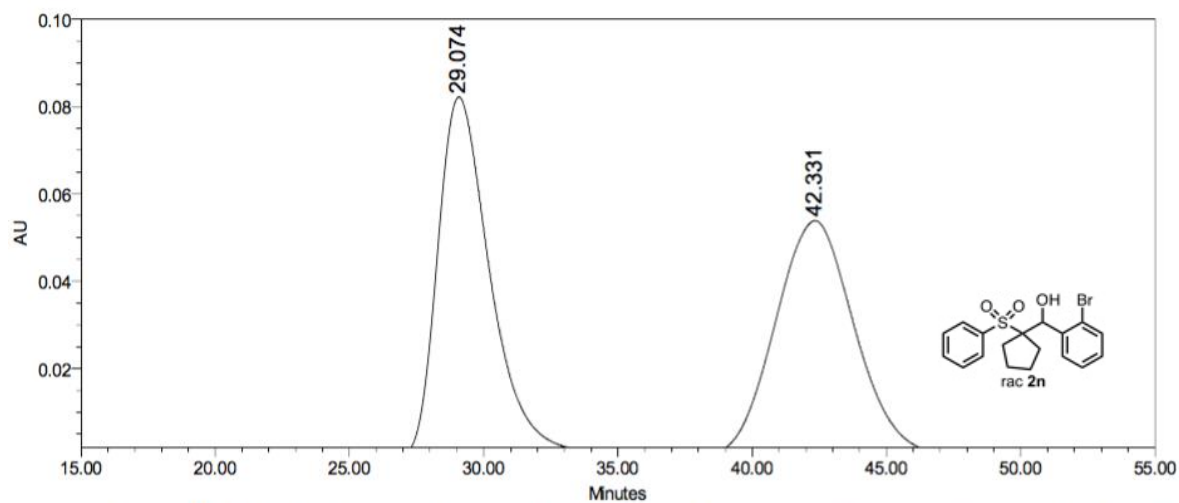

Channel: W2489 ChA; Processed Channel: W2489 ChA 215nm; Result Id: 3722; Processing Method: C

**Processed Channel Descr.: W2489 ChA 215nm**

|   | Processed Channel Descr. | RT     | Area     | % Area | Height |
|---|--------------------------|--------|----------|--------|--------|
| 1 | W2489 ChA 215nm          | 29.074 | 11098049 | 50.01  | 82082  |
| 2 | W2489 ChA 215nm          | 42.331 | 11091811 | 49.99  | 53809  |

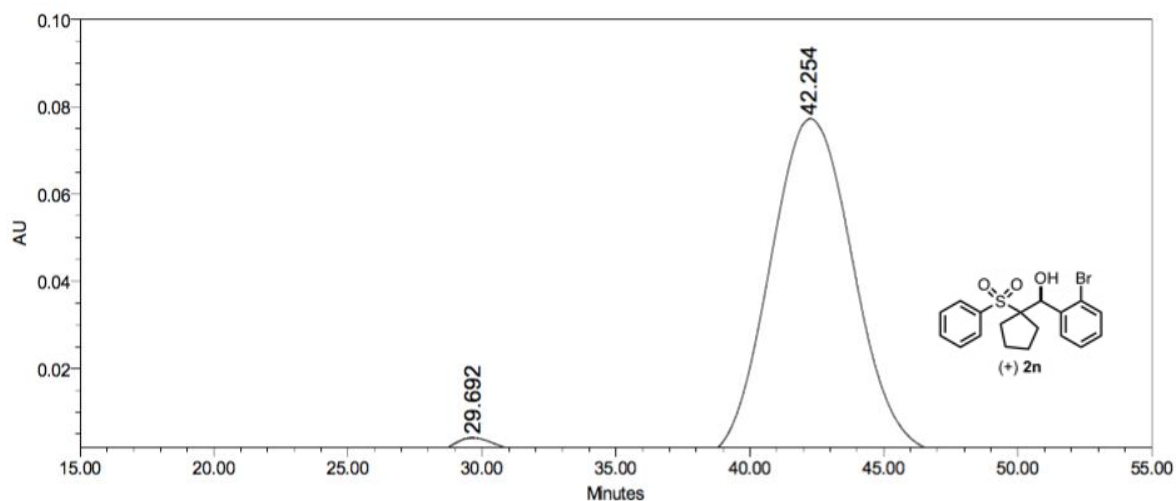

Channel: W2489 ChA; Processed Channel: W2489 ChA 215nm; Result Id: 3725; Processing Method: C

**Processed Channel Descr.: W2489 ChA 215nm**

|   | Processed Channel Descr. | RT     | Area     | % Area | Height |
|---|--------------------------|--------|----------|--------|--------|
| 1 | W2489 ChA 215nm          | 29.692 | 534822   | 3.02   | 4270   |
| 2 | W2489 ChA 215nm          | 42.254 | 17195530 | 96.98  | 77928  |

**1-(2-Bromophenyl)-2-(phenylsulfonyl)ethan-1-ol (2o):**

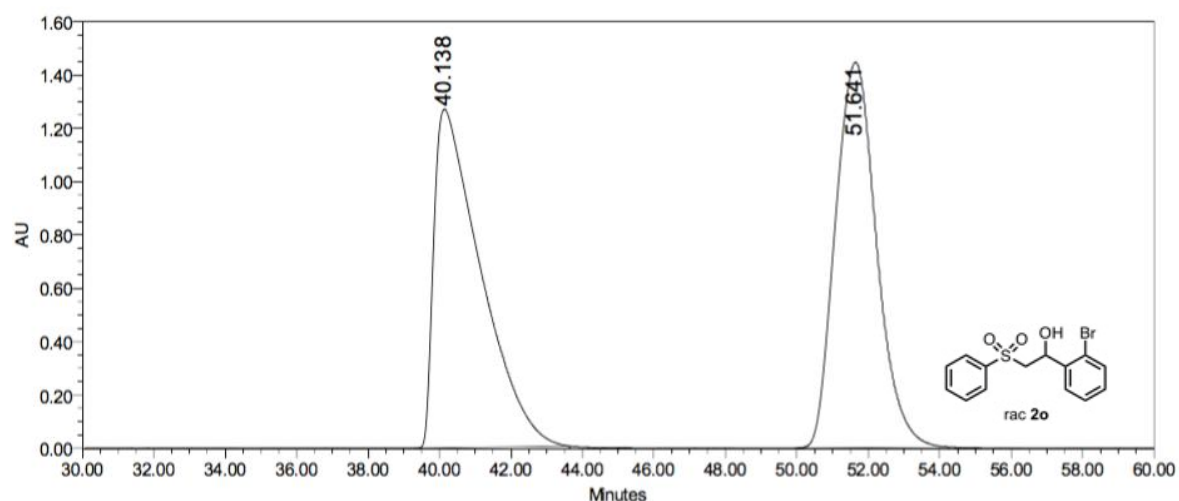

Channel: W2489 ChA; Processed Channel: W2489 ChA 215nm; Result Id: 3679; Processing Method: C

**Processed Channel Descr.: W2489 ChA 215nm**

|   | Processed Channel Descr. | RT     | Area      | % Area | Height  |
|---|--------------------------|--------|-----------|--------|---------|
| 1 | W2489 ChA 215nm          | 40.138 | 115650906 | 50.00  | 1270224 |
| 2 | W2489 ChA 215nm          | 51.641 | 115644001 | 50.00  | 1446000 |

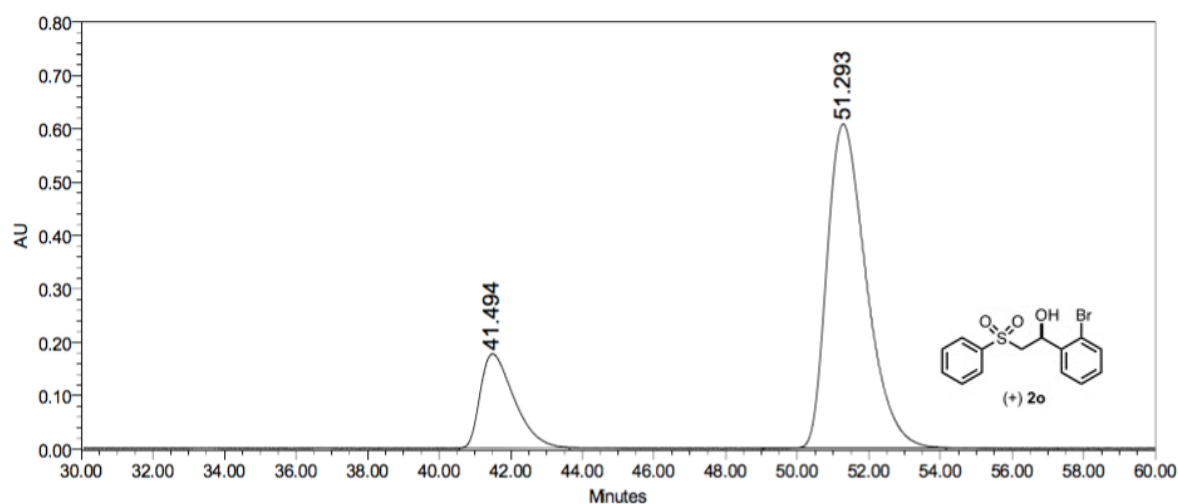

Channel: W2489 ChA; Processed Channel: W2489 ChA 215nm; Result Id: 3682; Processing Method: L

**Processed Channel Descr.: W2489 ChA 215nm**

|   | Processed Channel Descr. | RT     | Area     | % Area | Height |
|---|--------------------------|--------|----------|--------|--------|
| 1 | W2489 ChA 215nm          | 41.494 | 11501356 | 19.99  | 176683 |
| 2 | W2489 ChA 215nm          | 51.293 | 46021295 | 80.01  | 607400 |



**2-Methyl-1-phenyl-2-(phenylsulfonyl)propan-1-ol (2p):**

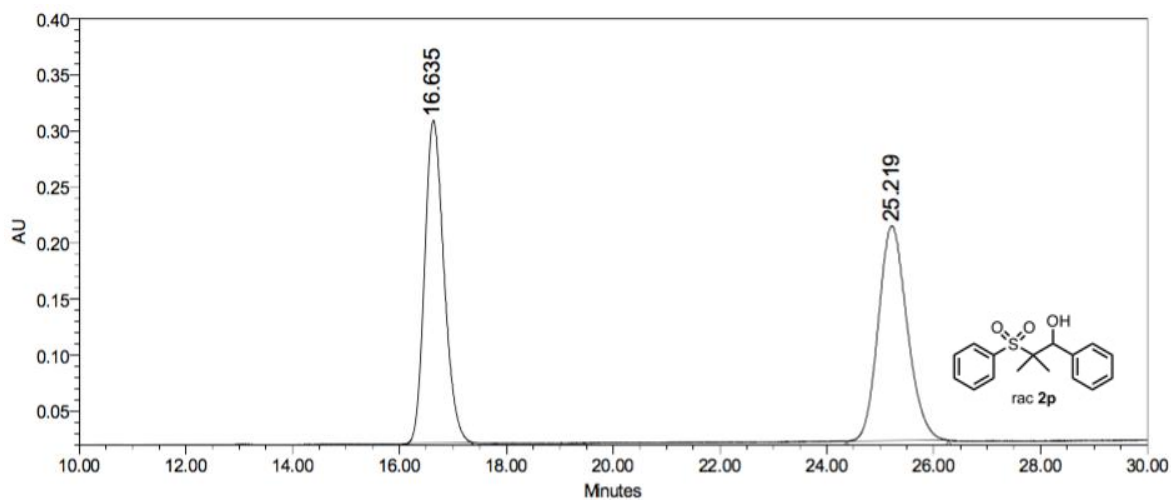

Channel: W2489 ChA; Processed Channel: W2489 ChA 215nm; Result Id: 3793; Processing Method: C

**Processed Channel Descr.: W2489 ChA 215nm**

|   | Processed Channel Descr. | RT     | Area    | % Area | Height |
|---|--------------------------|--------|---------|--------|--------|
| 1 | W2489 ChA 215nm          | 16.635 | 7234302 | 50.16  | 287746 |
| 2 | W2489 ChA 215nm          | 25.219 | 7187701 | 49.84  | 191815 |

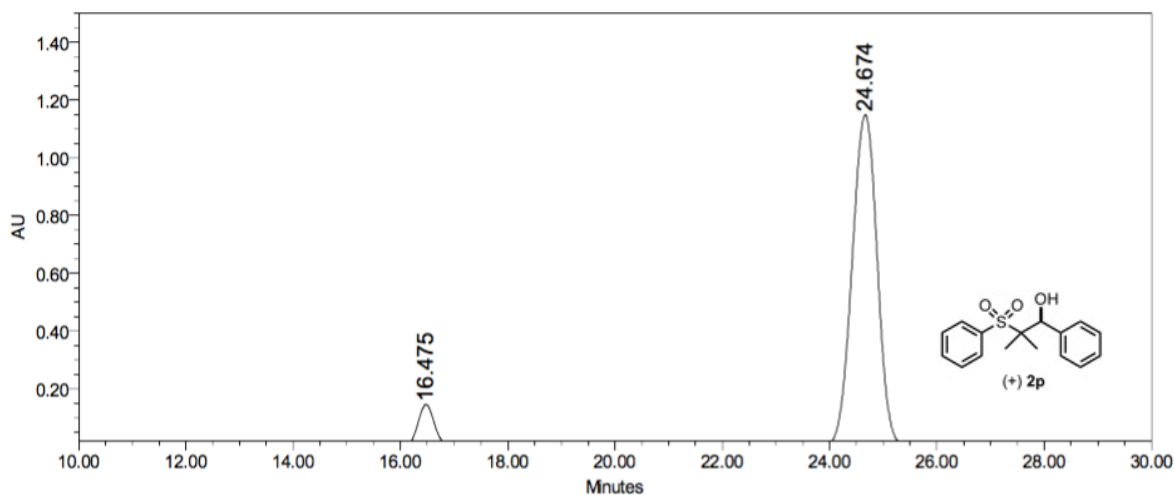

Channel: W2489 ChA; Processed Channel: W2489 ChA 215nm; Result Id: 3796; Processing Method: 5

**Processed Channel Descr.: W2489 ChA 215nm**

|   | Processed Channel Descr. | RT     | Area     | % Area | Height  |
|---|--------------------------|--------|----------|--------|---------|
| 1 | W2489 ChA 215nm          | 16.475 | 2770659  | 6.93   | 138762  |
| 2 | W2489 ChA 215nm          | 24.674 | 37205214 | 93.07  | 1148059 |

**2-Methyl-2-(phenylsulfonyl)-1-(o-tolyl)propan-1-ol (2q):**

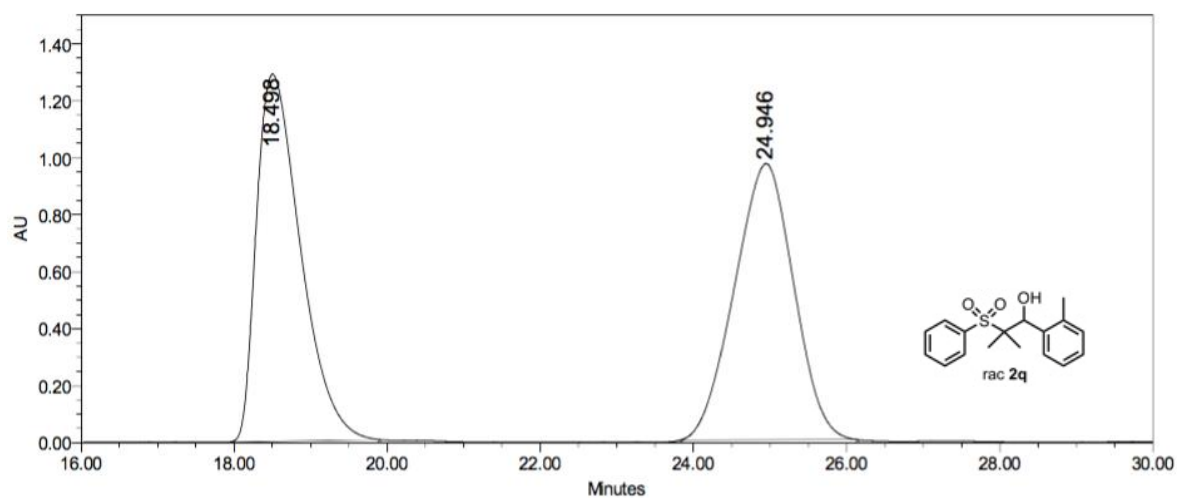

Channel: W2489 ChA; Processed Channel: W2489 ChA 215nm; Result Id: 3026; Processing Method: C

**Processed Channel Descr.: W2489 ChA 215nm**

|   | Processed Channel Descr. | RT     | Area     | % Area | Height  |
|---|--------------------------|--------|----------|--------|---------|
| 1 | W2489 ChA 215nm          | 18.498 | 51467318 | 49.71  | 1289375 |
| 2 | W2489 ChA 215nm          | 24.946 | 52066417 | 50.29  | 969222  |

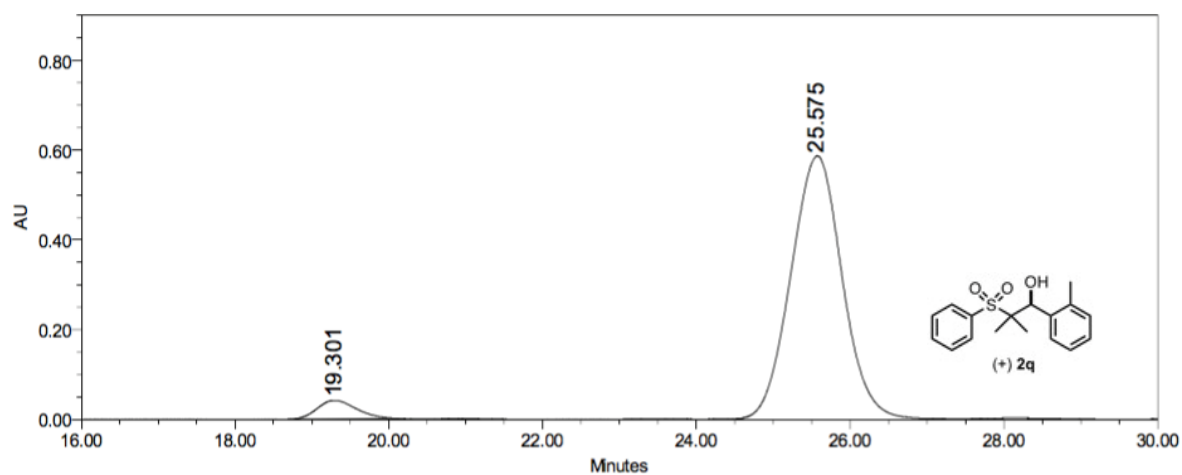

Channel: W2489 ChA; Processed Channel: W2489 ChA 215nm; Result Id: 3020; Processing Method: OOO

**Processed Channel Descr.: W2489 ChA 215nm**

|   | Processed Channel Descr. | RT     | Area     | % Area | Height |
|---|--------------------------|--------|----------|--------|--------|
| 1 | W2489 ChA 215nm          | 19.301 | 1412769  | 4.94   | 40788  |
| 2 | W2489 ChA 215nm          | 25.575 | 27181436 | 95.06  | 585852 |

**1-(2-Methoxyphenyl)-2-methyl-2-(phenylsulfonyl)propan-1-ol (2r):**

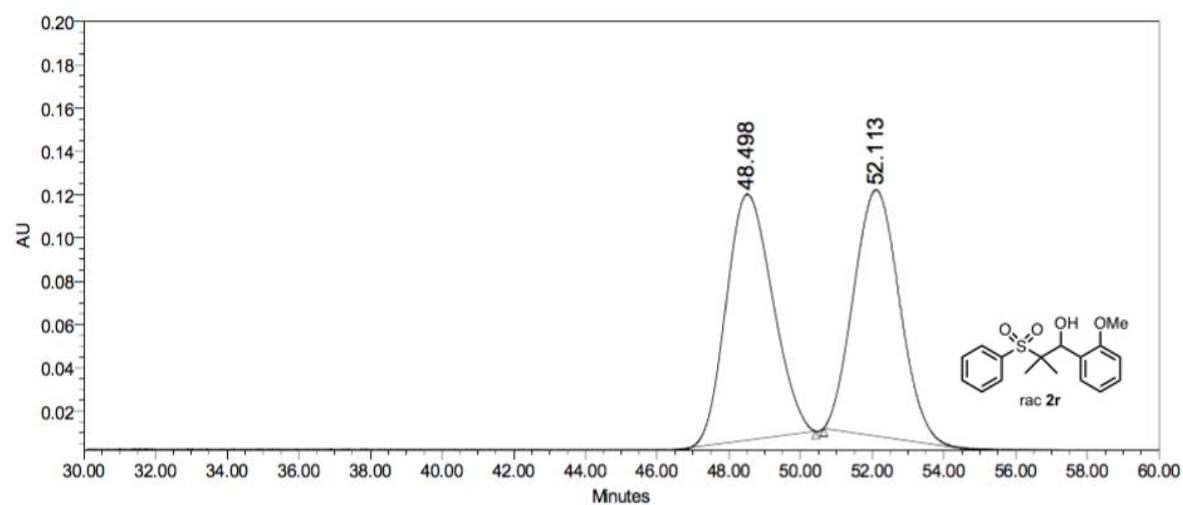

Channel: W2489 ChA; Processed Channel: W2489 ChA 215nm; Result Id: 3693; Processing Method: C

**Processed Channel Descr.: W2489 ChA 215nm**

|   | Processed Channel Descr. | RT     | Area     | % Area | Height |
|---|--------------------------|--------|----------|--------|--------|
| 1 | W2489 ChA 215nm          | 48.498 | 10196615 | 50.22  | 113719 |
| 2 | W2489 ChA 215nm          | 52.113 | 10108045 | 49.78  | 113881 |

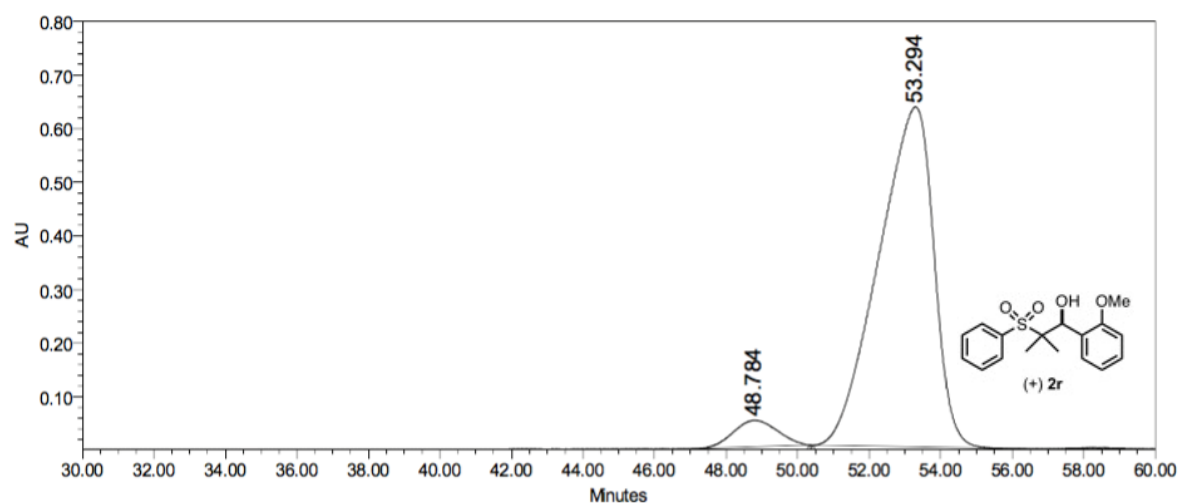

Channel: W2489 ChA; Processed Channel: W2489 ChA 215nm; Result Id: 3690; Processing Method: C

**Processed Channel Descr.: W2489 ChA 215nm**

|   | Processed Channel Descr. | RT     | Area     | % Area | Height |
|---|--------------------------|--------|----------|--------|--------|
| 1 | W2489 ChA 215nm          | 48.784 | 4231346  | 5.87   | 49680  |
| 2 | W2489 ChA 215nm          | 53.294 | 67857518 | 94.13  | 634857 |

## 2-Methyl-2-(phenylsulfonyl)-1-(2-(trifluoromethyl)phenyl)propan-1-ol (2s):

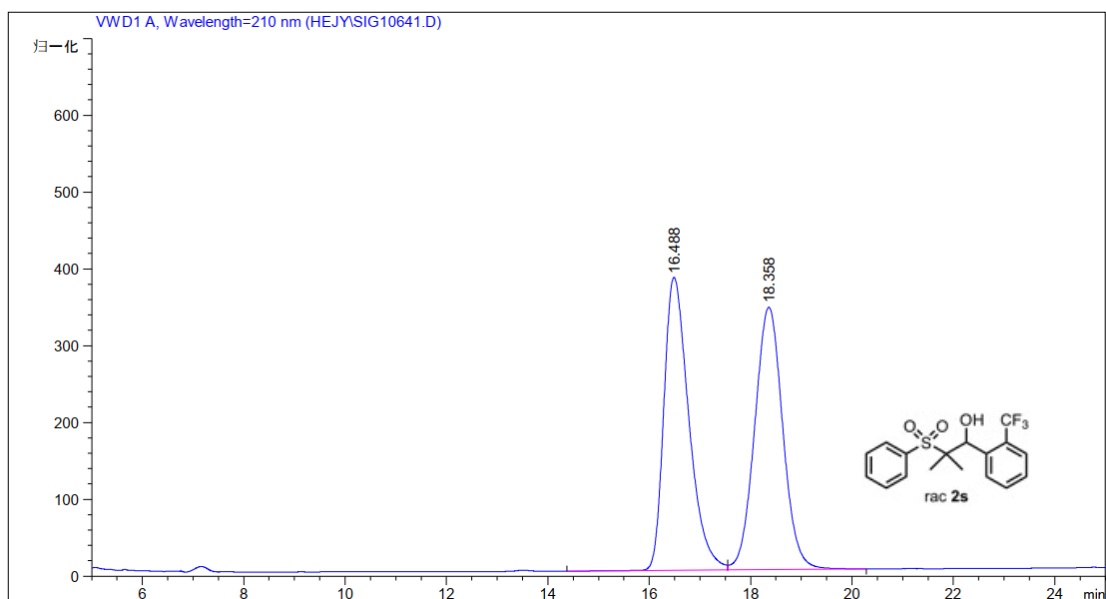

| # | [min]  | [min] | [mAU*s] | [mAU]     | %         |         |
|---|--------|-------|---------|-----------|-----------|---------|
| 1 | 16.488 | BV    | 0.5242  | 1.30497e4 | 381.55814 | 52.7553 |
| 2 | 18.358 | VB    | 0.5984  | 1.31772e4 | 341.70236 | 47.2447 |

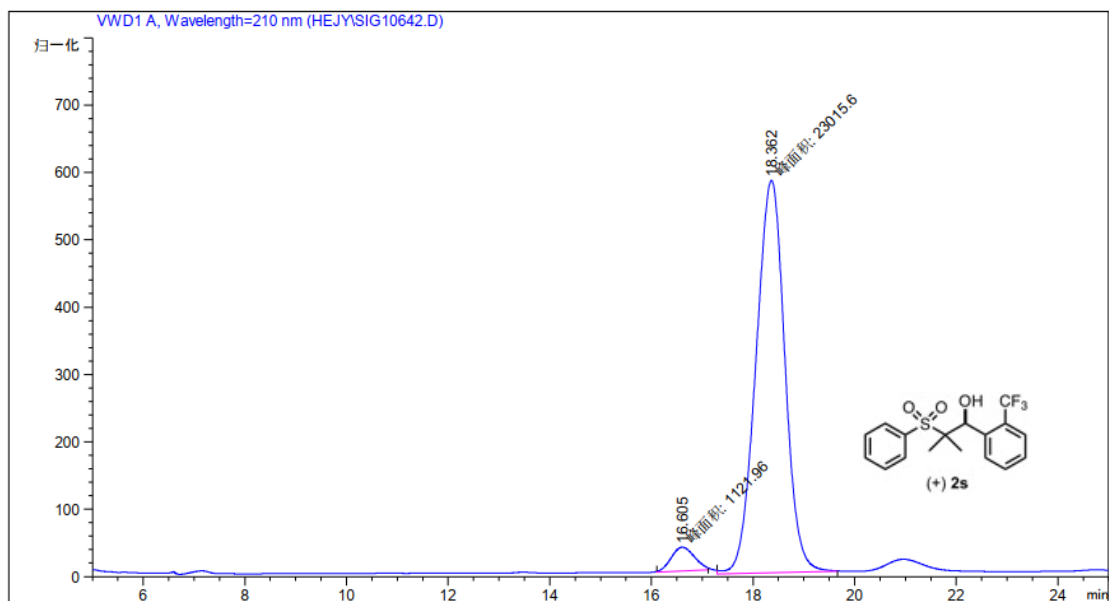

| # | [min]  | [min] | [mAU*s] | [mAU]      | %         |         |
|---|--------|-------|---------|------------|-----------|---------|
| 1 | 16.605 | MM    | 0.5284  | 1121.96472 | 35.38849  | 5.7235  |
| 2 | 18.362 | MM    | 0.6581  | 2.30156e4  | 582.91071 | 94.2765 |

### 1-(2-Fluorophenyl)-2-methyl-2-(phenylsulfonyl)propan-1-ol (2t):

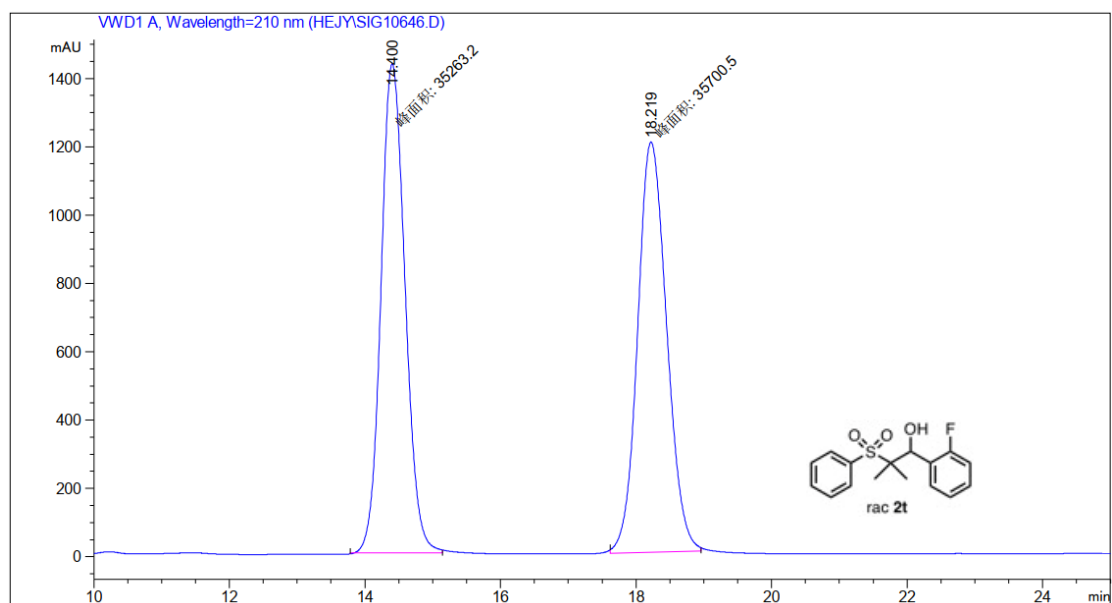

| # | [min]     | [min]  | [mAU*s]   | [mAU]      | %       |
|---|-----------|--------|-----------|------------|---------|
| 1 | 14.400 MM | 0.4106 | 3.52632e4 | 1431.33496 | 49.6919 |
| 2 | 18.219 MM | 0.4954 | 3.57005e4 | 1201.01697 | 50.3081 |

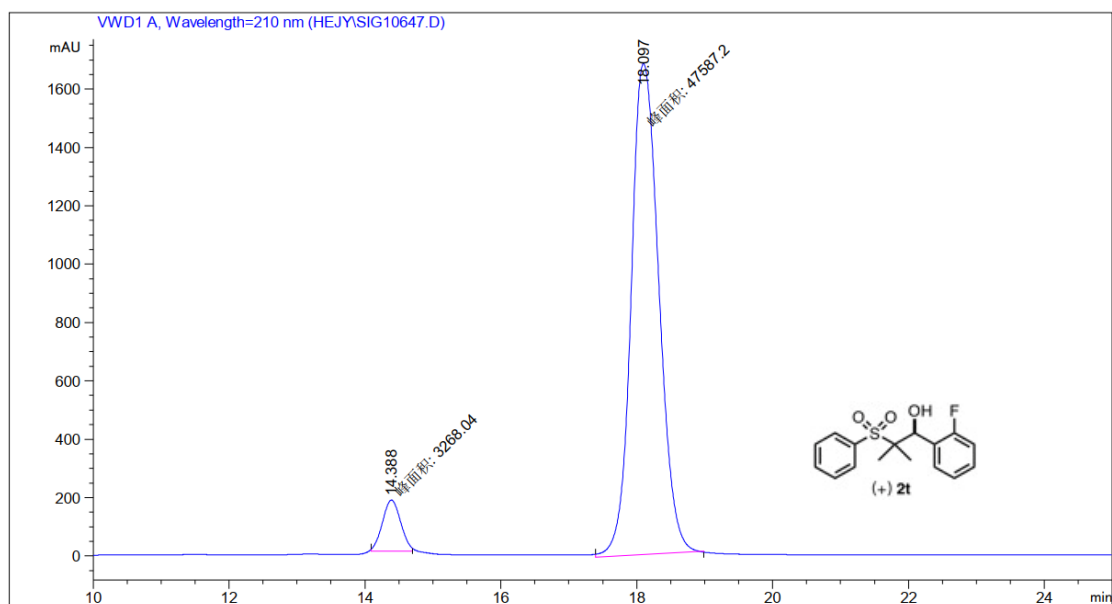

| # | [min]     | [min]  | [mAU*s]    | [mAU]      | %       |
|---|-----------|--------|------------|------------|---------|
| 1 | 14.388 MM | 0.3105 | 3268.04297 | 175.39735  | 6.4262  |
| 2 | 18.097 MM | 0.4712 | 4.75872e4  | 1683.06738 | 93.5738 |

**2-Methyl-2-(phenylsulfonyl)-1-(m-tolyl)propan-1-ol (2u):**

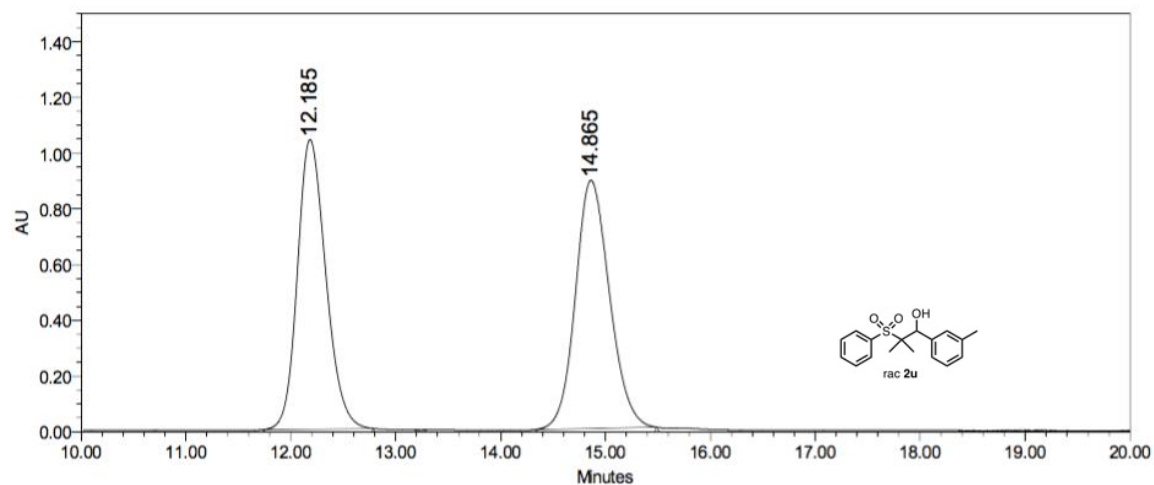

Channel: W2489 ChA; Processed Channel: W2489 ChA 215nm; Result Id: 3148; Processing Method: C

**Processed Channel Descr.: W2489 ChA 215nm**

|   | Processed Channel Descr. | RT     | Area     | % Area | Height  |
|---|--------------------------|--------|----------|--------|---------|
| 1 | W2489 ChA 215nm          | 12.185 | 19589979 | 49.33  | 1038988 |
| 2 | W2489 ChA 215nm          | 14.865 | 20124346 | 50.67  | 890414  |

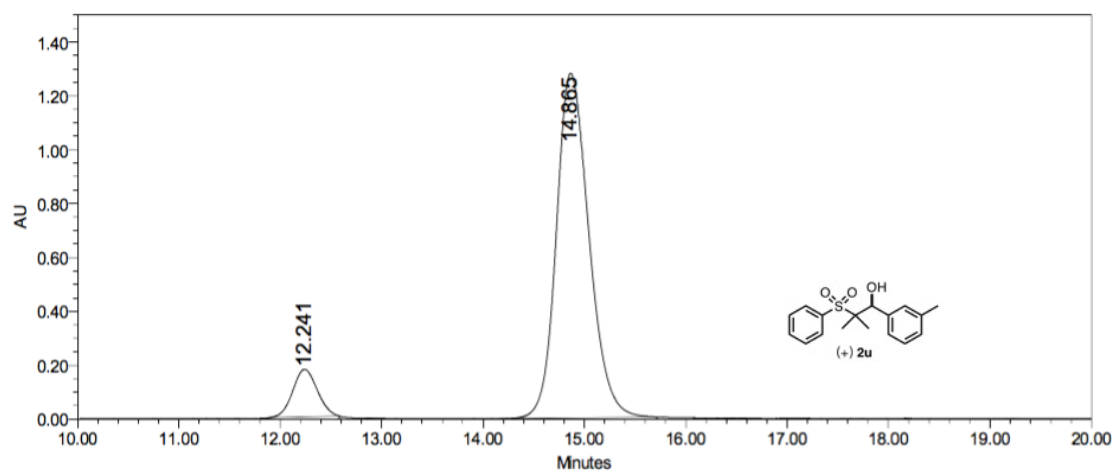

Channel: W2489 ChA; Processed Channel: W2489 ChA 215nm; Result Id: 3145; Processing Method: 2

**Processed Channel Descr.: W2489 ChA 215nm**

|   | Processed Channel Descr. | RT     | Area     | % Area | Height  |
|---|--------------------------|--------|----------|--------|---------|
| 1 | W2489 ChA 215nm          | 12.241 | 2959478  | 9.39   | 176436  |
| 2 | W2489 ChA 215nm          | 14.865 | 28569129 | 90.61  | 1279441 |

**1-(3-Methoxyphenyl)-2-methyl-2-(phenylsulfonyl)propan-1-ol (2v):**

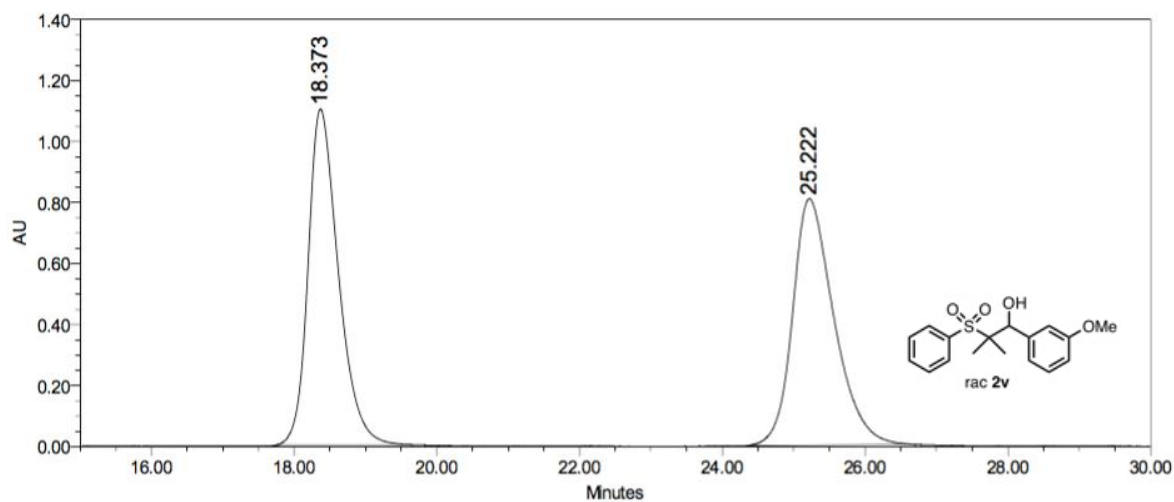

Channel: W2489 ChA; Processed Channel: W2489 ChA 215nm; Result Id: 3135; Processing Method: C

**Processed Channel Descr.: W2489 ChA 215nm**

|   | Processed Channel Descr. | RT     | Area     | % Area | Height  |
|---|--------------------------|--------|----------|--------|---------|
| 1 | W2489 ChA 215nm          | 18.373 | 32461717 | 49.99  | 1101040 |
| 2 | W2489 ChA 215nm          | 25.222 | 32480864 | 50.01  | 807140  |

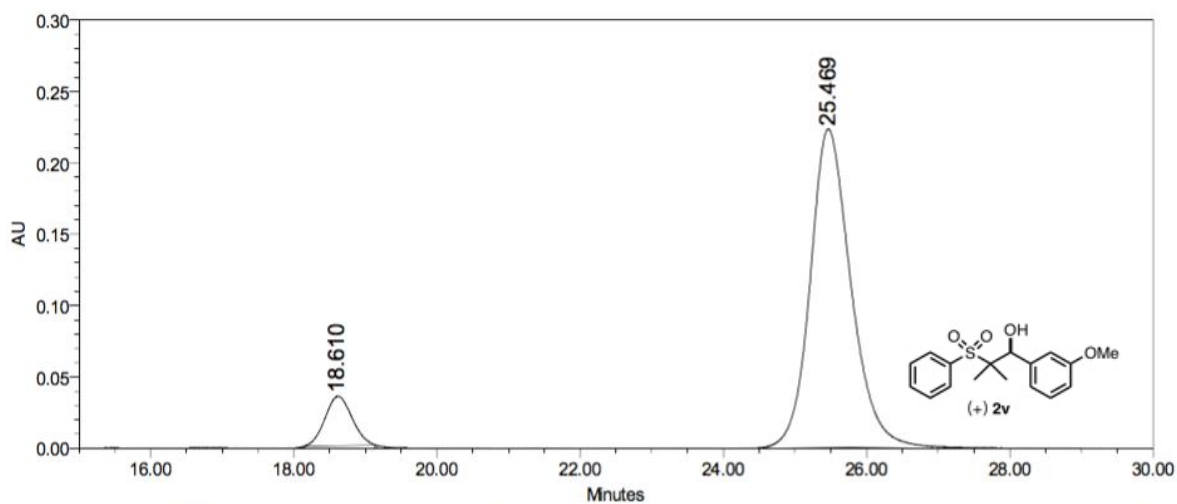

Channel: W2489 ChA; Processed Channel: W2489 ChA 215nm; Result Id: 3142; Processing Method: C

**Processed Channel Descr.: W2489 ChA 215nm**

|   | Processed Channel Descr. | RT     | Area    | % Area | Height |
|---|--------------------------|--------|---------|--------|--------|
| 1 | W2489 ChA 215nm          | 18.610 | 911637  | 9.41   | 34660  |
| 2 | W2489 ChA 215nm          | 25.469 | 8778531 | 90.59  | 223225 |

**1-(3-Bromophenyl)-2-methyl-2-(phenylsulfonyl)propan-1-ol (2w):**

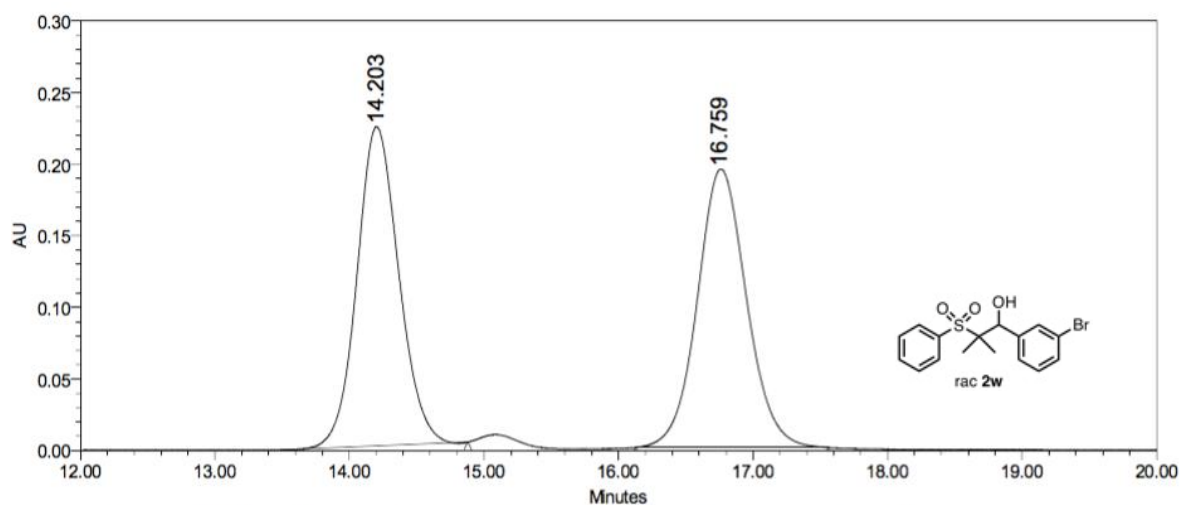

Channel: W2489 ChA; Processed Channel: W2489 ChA 215nm; Result Id: 3200; Processing Method: C

**Processed Channel Descr.: W2489 ChA 215nm**

|   | Processed Channel Descr. | RT     | Area    | % Area | Height |
|---|--------------------------|--------|---------|--------|--------|
| 1 | W2489 ChA 215nm          | 14.203 | 4816008 | 49.43  | 222747 |
| 2 | W2489 ChA 215nm          | 16.759 | 4927042 | 50.57  | 194362 |

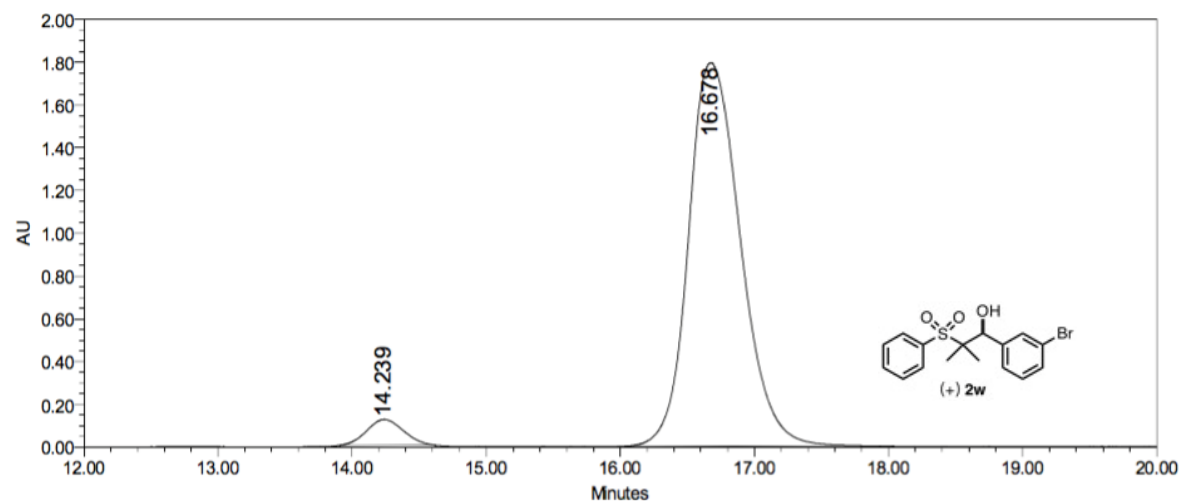

Channel: W2489 ChA; Processed Channel: W2489 ChA 215nm; Result Id: 3197; Processing Method: C

**Processed Channel Descr.: W2489 ChA 215nm**

|   | Processed Channel Descr. | RT     | Area     | % Area | Height  |
|---|--------------------------|--------|----------|--------|---------|
| 1 | W2489 ChA 215nm          | 14.239 | 2300852  | 4.56   | 120510  |
| 2 | W2489 ChA 215nm          | 16.678 | 48181074 | 95.44  | 1793858 |



**2-Methyl-2-(phenylsulfonyl)-1-(p-tolyl)propan-1-ol (2x):**

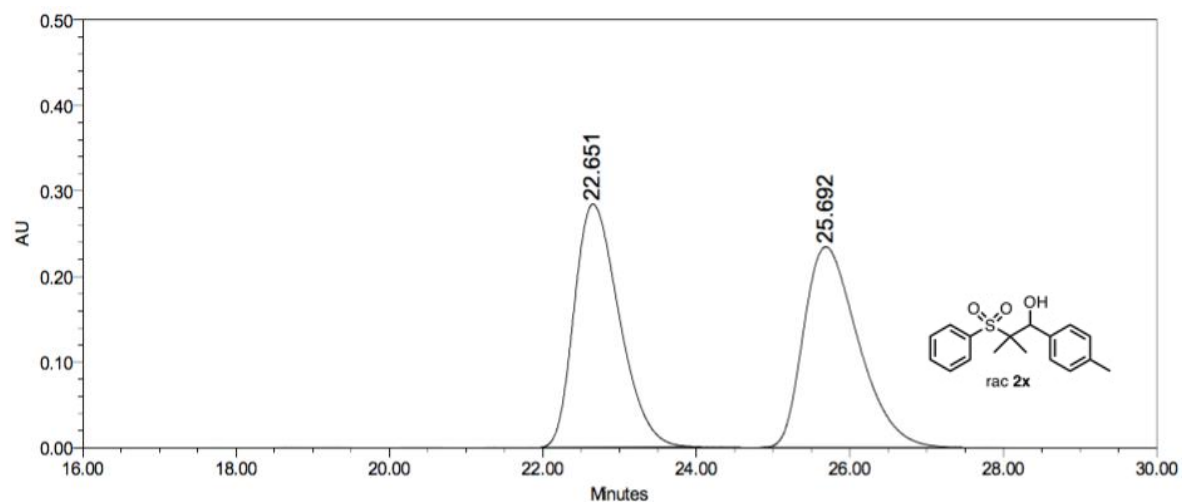

Channel: W2489 ChA; Processed Channel: W2489 ChA 215nm; Result Id: 3032; Processing Method: C

**Processed Channel Descr.: W2489 ChA 215nm**

|   | Processed Channel Descr. | RT     | Area     | % Area | Height |
|---|--------------------------|--------|----------|--------|--------|
| 1 | W2489 ChA 215nm          | 22.651 | 11549155 | 49.92  | 283792 |
| 2 | W2489 ChA 215nm          | 25.692 | 11587300 | 50.08  | 234142 |

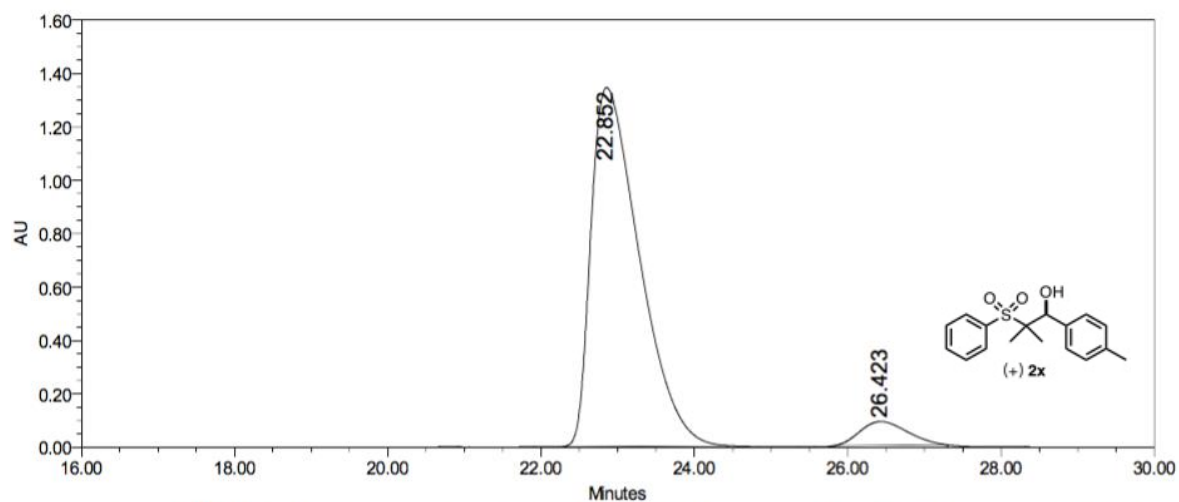

Channel: W2489 ChA; Processed Channel: W2489 ChA 215nm; Result Id: 3029; Processing Method: C

**Processed Channel Descr.: W2489 ChA 215nm**

|   | Processed Channel Descr. | RT     | Area     | % Area | Height  |
|---|--------------------------|--------|----------|--------|---------|
| 1 | W2489 ChA 215nm          | 22.852 | 58877851 | 93.93  | 1344159 |
| 2 | W2489 ChA 215nm          | 26.423 | 3802293  | 6.07   | 89047   |

**1-(4-Methoxyphenyl)-2-methyl-2-(phenylsulfonyl)-propan-1-ol (2y):**

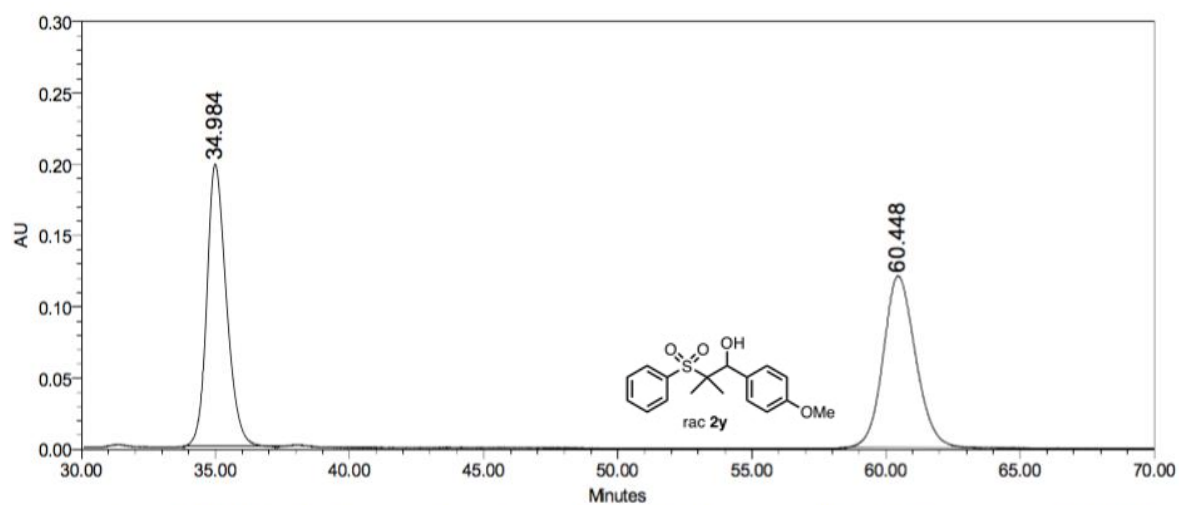

Channel: W2489 ChA; Processed Channel: W2489 ChA 215nm; Result Id: 3076; Processing Method: C

**Processed Channel Descr.: W2489 ChA 215nm**

|   | Processed Channel Descr. | RT     | Area     | % Area | Height |
|---|--------------------------|--------|----------|--------|--------|
| 1 | W2489 ChA 215nm          | 34.984 | 10040663 | 49.95  | 197976 |
| 2 | W2489 ChA 215nm          | 60.448 | 10061808 | 50.05  | 120483 |

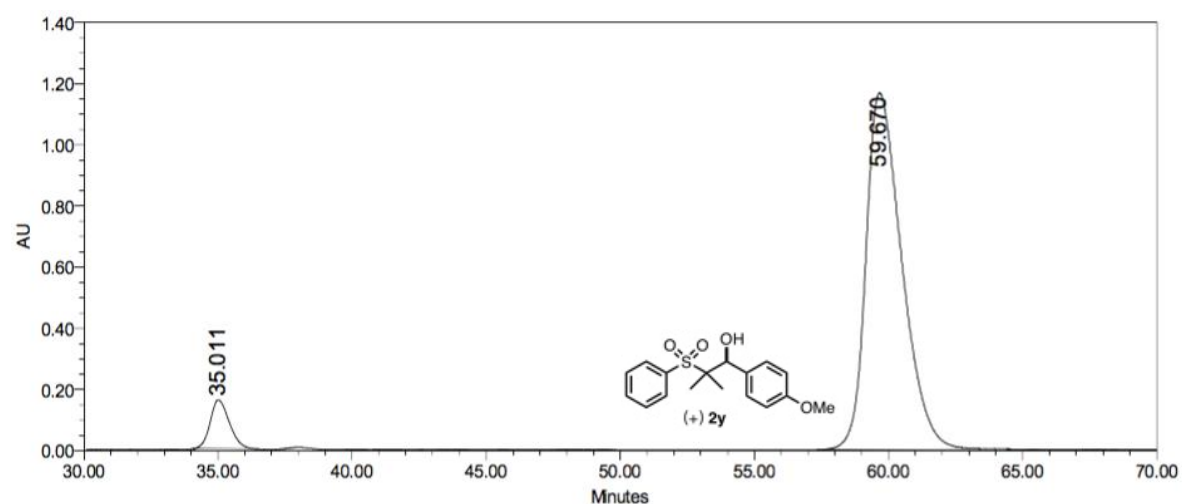

Channel: W2489 ChA; Processed Channel: W2489 ChA 215nm; Result Id: 3080; Processing Method: C

**Processed Channel Descr.: W2489 ChA 215nm**

|   | Processed Channel Descr. | RT     | Area      | % Area | Height  |
|---|--------------------------|--------|-----------|--------|---------|
| 1 | W2489 ChA 215nm          | 35.011 | 7986247   | 6.90   | 160134  |
| 2 | W2489 ChA 215nm          | 59.670 | 107796357 | 93.10  | 1166059 |

**1-(4-Fluorophenyl)-2-methyl-2-(phenylsulfonyl)propan-1-ol (2z):**

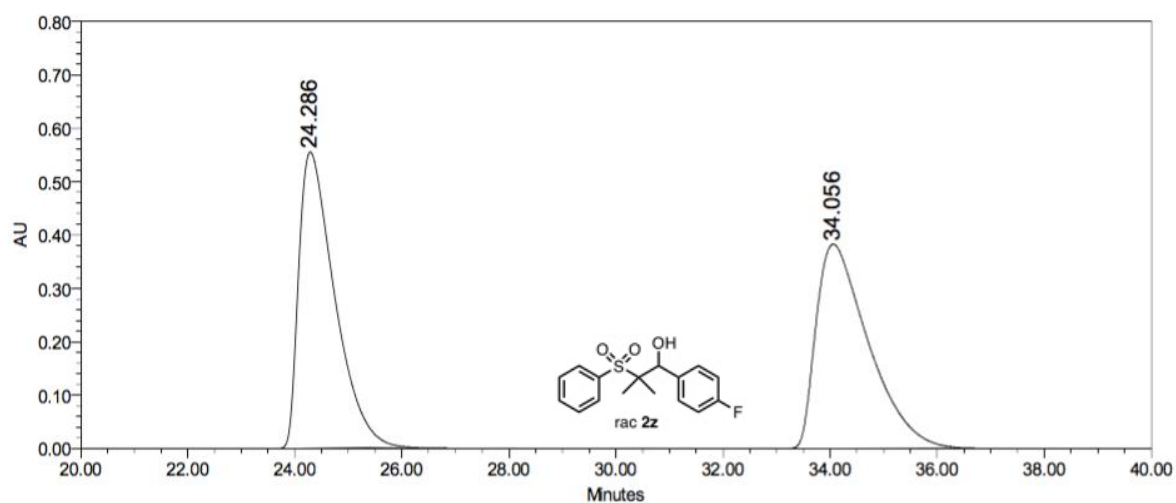

Channel: W2489 ChA; Processed Channel: W2489 ChA 215nm; Result Id: 3041; Processing Method: C

**Processed Channel Descr.: W2489 ChA 215nm**

|   | Processed Channel Descr. | RT     | Area     | % Area | Height |
|---|--------------------------|--------|----------|--------|--------|
| 1 | W2489 ChA 215nm          | 24.286 | 25825235 | 49.95  | 555111 |
| 2 | W2489 ChA 215nm          | 34.056 | 25874177 | 50.05  | 382390 |

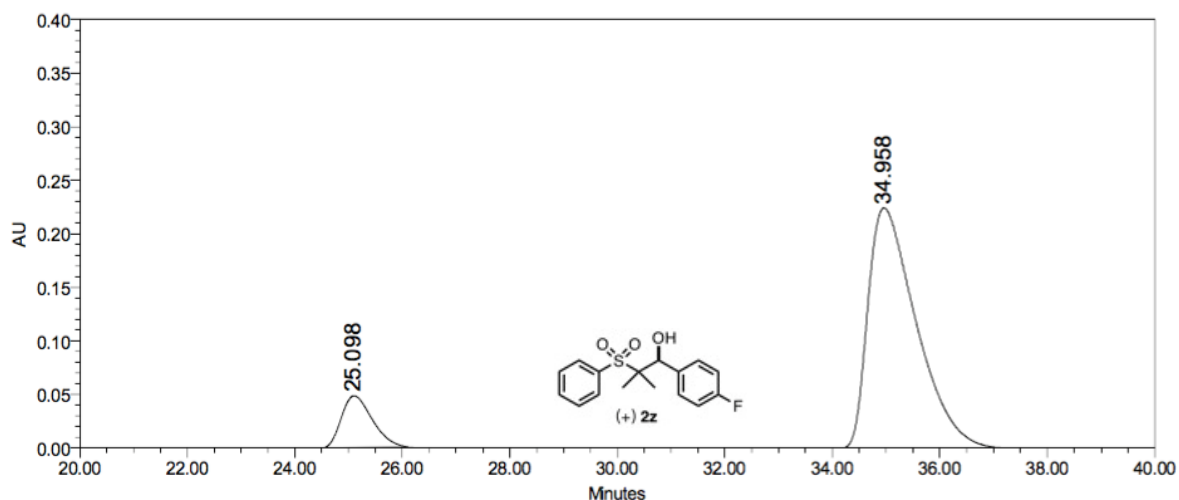

Channel: W2489 ChA; Processed Channel: W2489 ChA 215nm; Result Id: 3044; Processing Method: C

**Processed Channel Descr.: W2489 ChA 215nm**

|   | Processed Channel Descr. | RT     | Area     | % Area | Height |
|---|--------------------------|--------|----------|--------|--------|
| 1 | W2489 ChA 215nm          | 25.098 | 1906797  | 11.95  | 48192  |
| 2 | W2489 ChA 215nm          | 34.958 | 14051039 | 88.05  | 225147 |

**2-Methyl-2-(phenylsulfonyl)-1-(4-(trifluoromethyl)phenyl)propan-1-ol (2aa):**

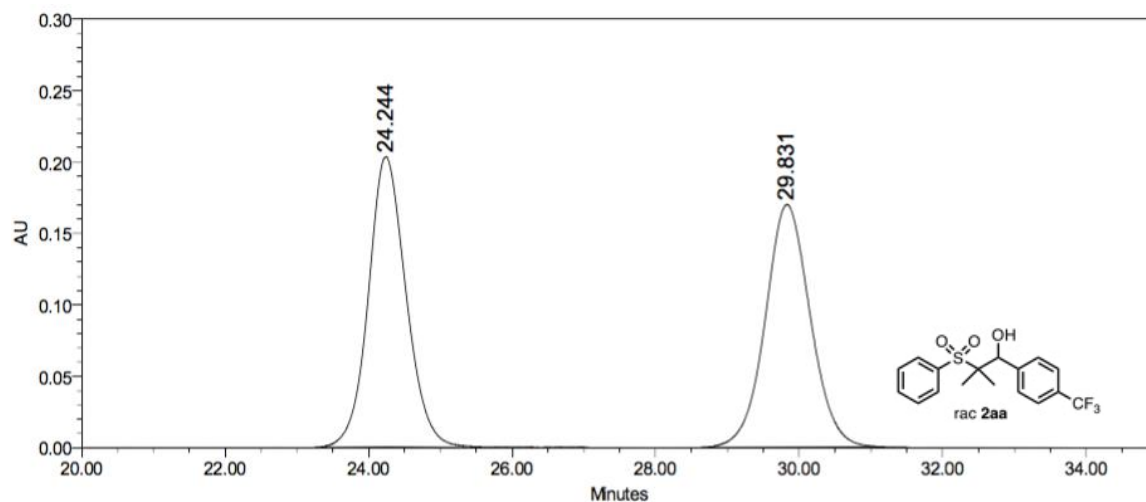

Channel: W2489 ChA; Processed Channel: W2489 ChA 215nm; Result Id: 3167; Processing Method: C

**Processed Channel Descr.: W2489 ChA 215nm**

|   | Processed Channel Descr. | RT     | Area    | % Area | Height |
|---|--------------------------|--------|---------|--------|--------|
| 1 | W2489 ChA 215nm          | 24.244 | 7367430 | 49.91  | 202826 |
| 2 | W2489 ChA 215nm          | 29.831 | 7392609 | 50.09  | 169563 |

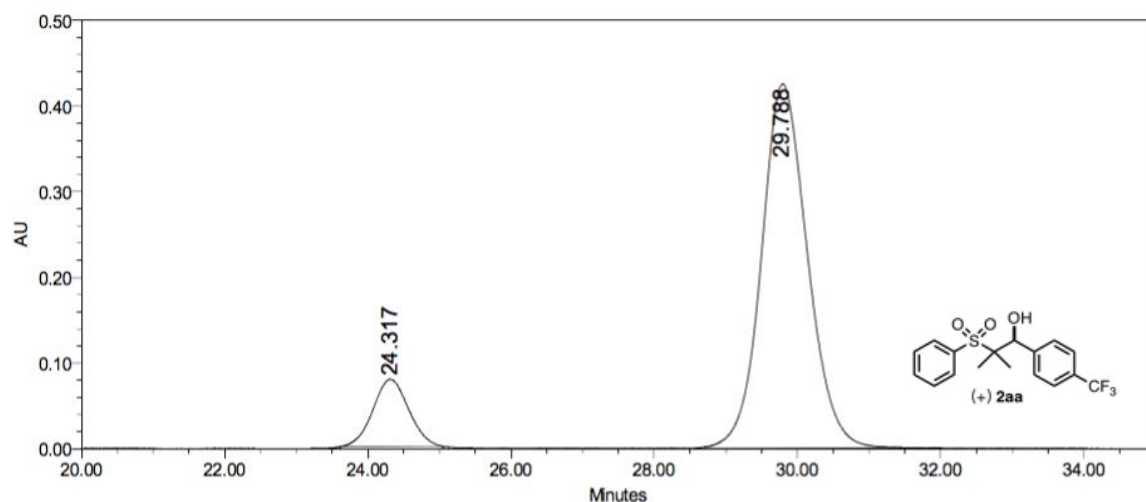

Channel: W2489 ChA; Processed Channel: W2489 ChA 215nm; Result Id: 3181; Processing Method: C

**Processed Channel Descr.: W2489 ChA 215nm**

|   | Processed Channel Descr. | RT     | Area     | % Area | Height |
|---|--------------------------|--------|----------|--------|--------|
| 1 | W2489 ChA 215nm          | 24.317 | 2726806  | 12.58  | 78524  |
| 2 | W2489 ChA 215nm          | 29.788 | 18942865 | 87.42  | 424906 |

**1-(4-Bromophenyl)-2-methyl-2-(phenylsulfonyl)propan-1-ol (2ab):**

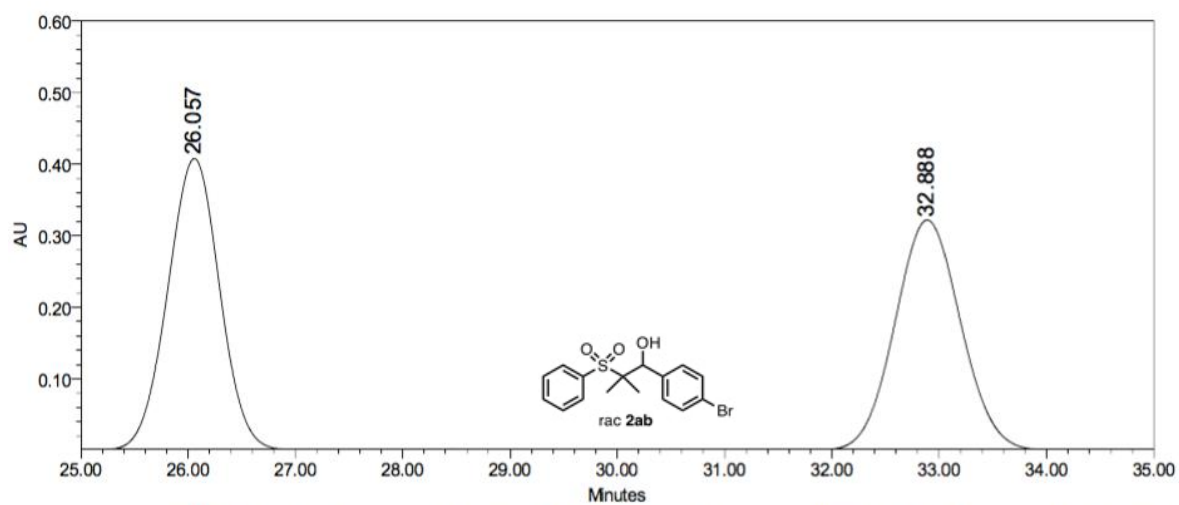

**Processed Channel Descr.: W2489 ChA 215nm**

|   | Processed Channel Descr. | RT     | Area     | % Area | Height |
|---|--------------------------|--------|----------|--------|--------|
| 1 | W2489 ChA 215nm          | 26.057 | 13742064 | 50.33  | 407283 |
| 2 | W2489 ChA 215nm          | 32.888 | 13559804 | 49.67  | 320474 |

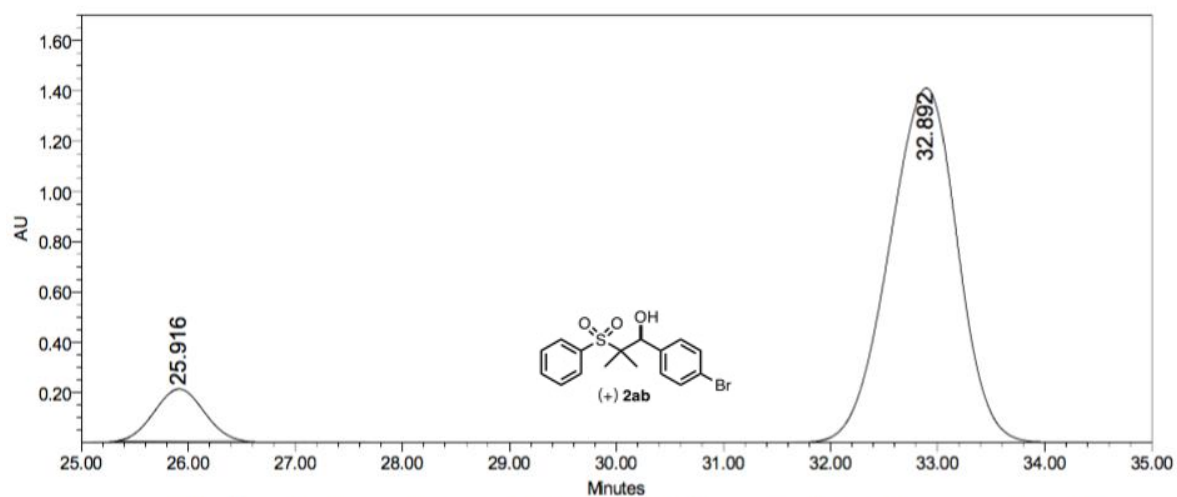

**Processed Channel Descr.: W2489 ChA 215nm**

|   | Processed Channel Descr. | RT     | Area     | % Area | Height  |
|---|--------------------------|--------|----------|--------|---------|
| 1 | W2489 ChA 215nm          | 25.916 | 6590287  | 9.57   | 206252  |
| 2 | W2489 ChA 215nm          | 32.892 | 62305185 | 90.43  | 1410985 |

**1-(3,4-Dimethoxyphenyl)-2-methyl-2-(phenylsulfonyl)propan-1-ol (2ac):**

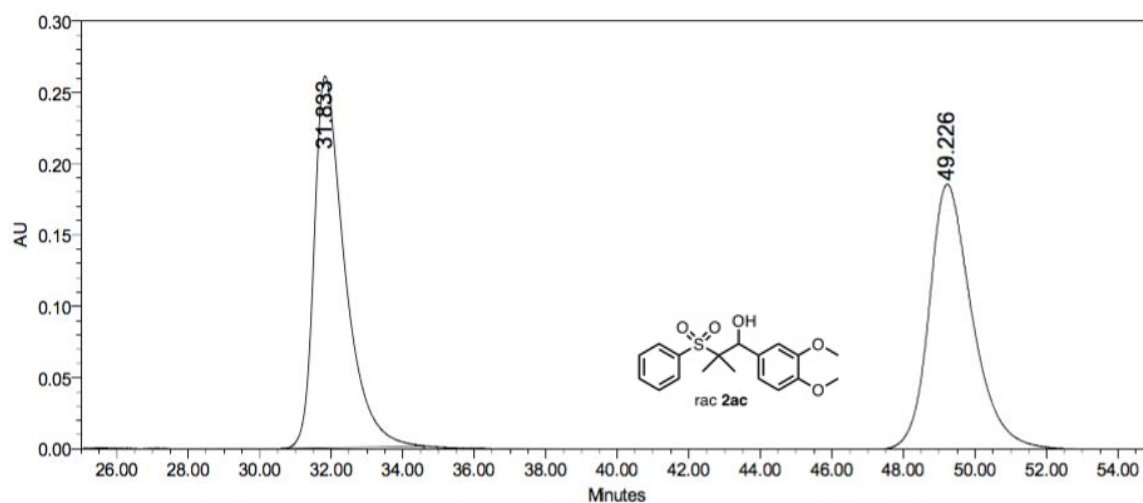

Channel: W2489 ChA; Processed Channel: W2489 ChA 215nm; Result Id: 3154; Processing Method: C

**Processed Channel Descr.: W2489 ChA 215nm**

|   | Processed Channel Descr. | RT     | Area     | % Area | Height |
|---|--------------------------|--------|----------|--------|--------|
| 1 | W2489 ChA 215nm          | 31.833 | 15506114 | 50.12  | 260739 |
| 2 | W2489 ChA 215nm          | 49.226 | 15431287 | 49.88  | 185695 |

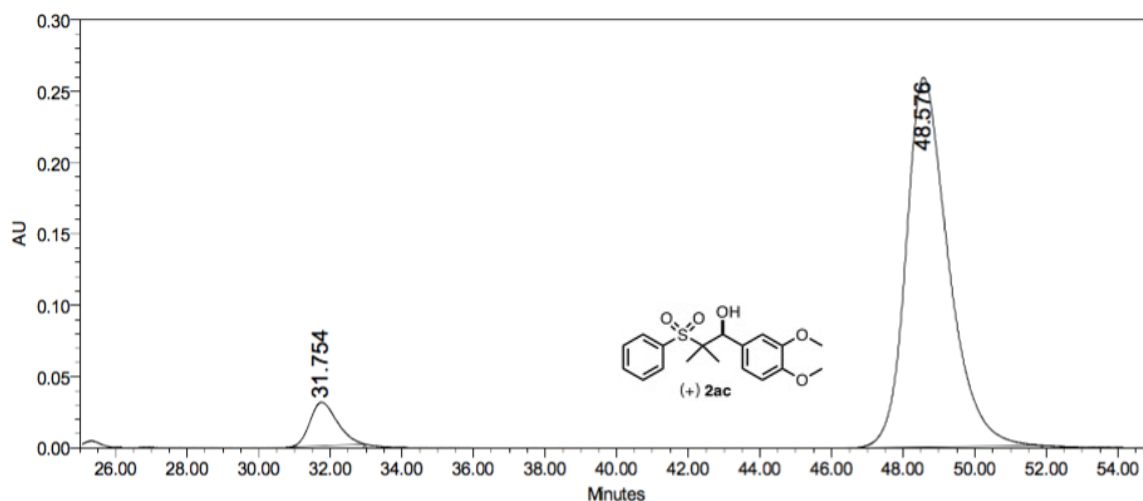

Channel: W2489 ChA; Processed Channel: W2489 ChA 215nm; Result Id: 3161; Processing Method: C

**Processed Channel Descr.: W2489 ChA 215nm**

|   | Processed Channel Descr. | RT     | Area     | % Area | Height |
|---|--------------------------|--------|----------|--------|--------|
| 1 | W2489 ChA 215nm          | 31.754 | 1603103  | 7.04   | 30475  |
| 2 | W2489 ChA 215nm          | 48.576 | 21181761 | 92.96  | 258895 |

**1-(2,4-Dichlorophenyl)-2-methyl-2-(phenylsulfonyl)propan-1-ol (2ad):**

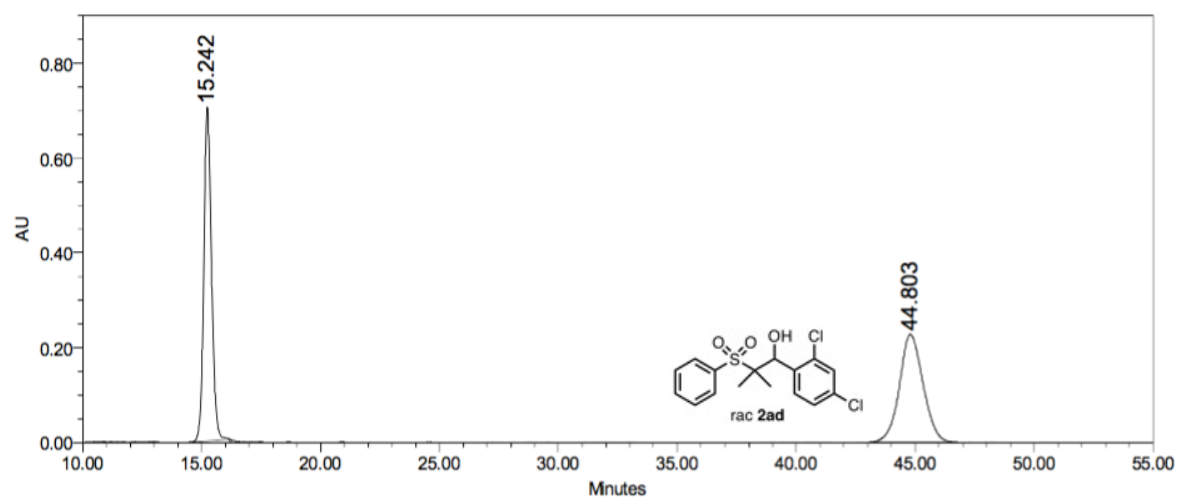

**Processed Channel Descr.: W2489 ChA 215nm**

|   | Processed Channel Descr. | RT     | Area     | % Area | Height |
|---|--------------------------|--------|----------|--------|--------|
| 1 | W2489 ChA 215nm          | 15.242 | 15741935 | 50.22  | 703801 |
| 2 | W2489 ChA 215nm          | 44.803 | 15604009 | 49.78  | 227533 |

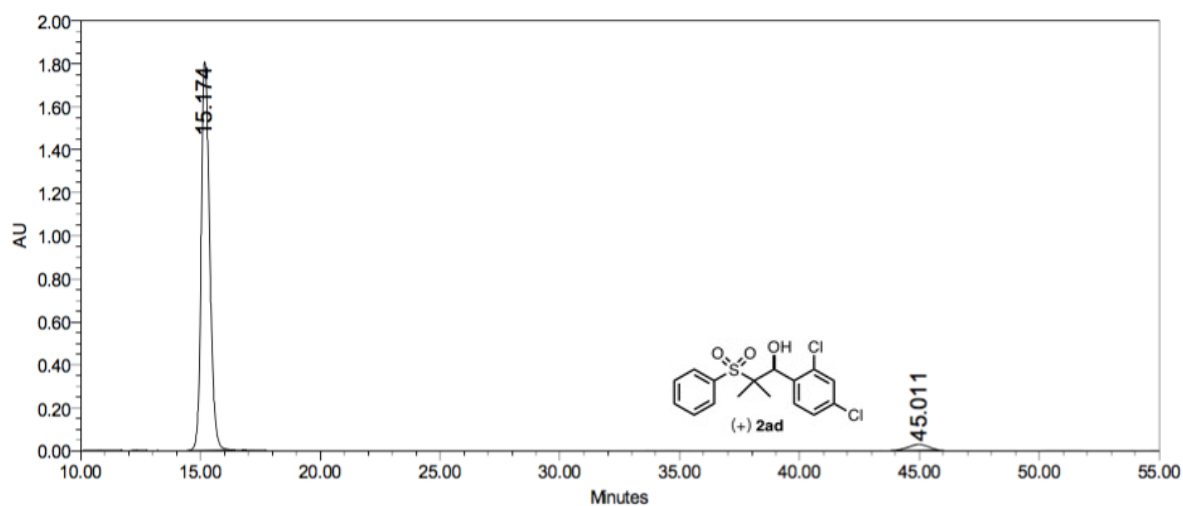

**Processed Channel Descr.: W2489 ChA 215nm**

|   | Processed Channel Descr. | RT     | Area     | % Area | Height  |
|---|--------------------------|--------|----------|--------|---------|
| 1 | W2489 ChA 215nm          | 15.174 | 44366801 | 97.54  | 1806185 |
| 2 | W2489 ChA 215nm          | 45.011 | 1118088  | 2.46   | 22533   |

**1-(4-Fluoro-2-iodophenyl)-2-methyl-2-(phenylsulfonyl)propan-1-ol (2ae):**

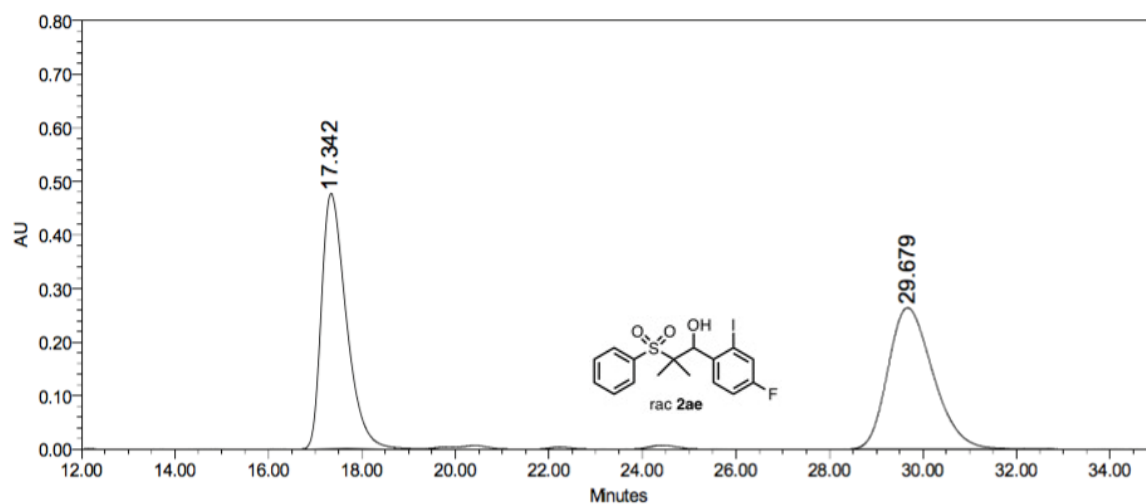

Channel: W2489 ChA; Processed Channel: W2489 ChA 215nm; Result Id: 3035; Processing Method: C

**Processed Channel Descr.: W2489 ChA 215nm**

|   | Processed Channel Descr. | RT     | Area     | % Area | Height |
|---|--------------------------|--------|----------|--------|--------|
| 1 | W2489 ChA 215nm          | 17.342 | 17389252 | 49.98  | 475923 |
| 2 | W2489 ChA 215nm          | 29.679 | 17406079 | 50.02  | 262905 |

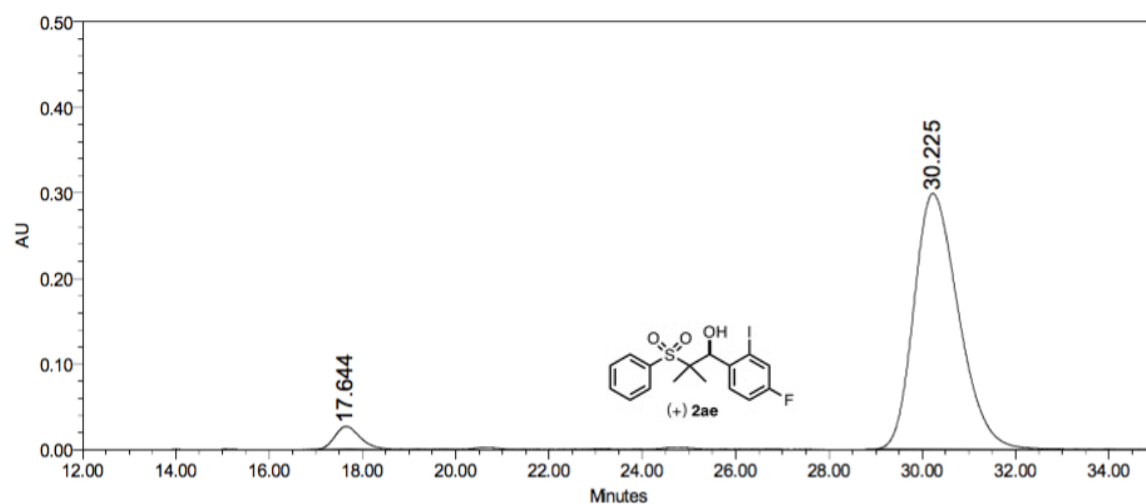

Channel: W2489 ChA; Processed Channel: W2489 ChA 215nm; Result Id: 3038; Processing Method: C

**Processed Channel Descr.: W2489 ChA 215nm**

|   | Processed Channel Descr. | RT     | Area     | % Area | Height |
|---|--------------------------|--------|----------|--------|--------|
| 1 | W2489 ChA 215nm          | 17.644 | 917913   | 4.48   | 25897  |
| 2 | W2489 ChA 215nm          | 30.225 | 19570708 | 95.52  | 297949 |



**2-Methyl-2-(phenylsulfonyl)-1-(pyridin-2-yl)propan-1-ol (2af):**

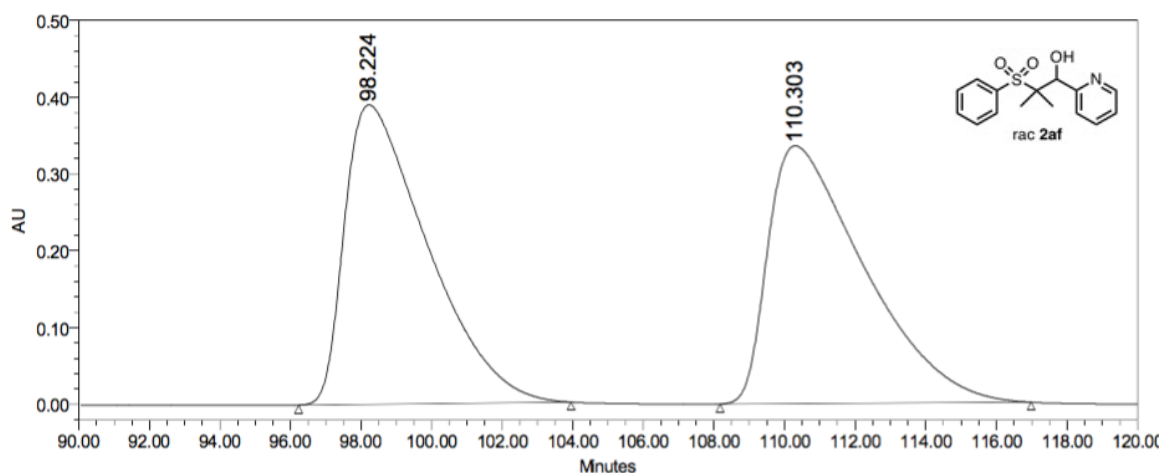

**Processed Channel Descr.: W2489 ChA 210nm**

|   | Processed Channel Descr. | RT      | Area     | % Area | Height |
|---|--------------------------|---------|----------|--------|--------|
| 1 | W2489 ChA 210nm          | 98.224  | 63788359 | 49.98  | 390345 |
| 2 | W2489 ChA 210nm          | 110.303 | 63851359 | 50.02  | 336111 |

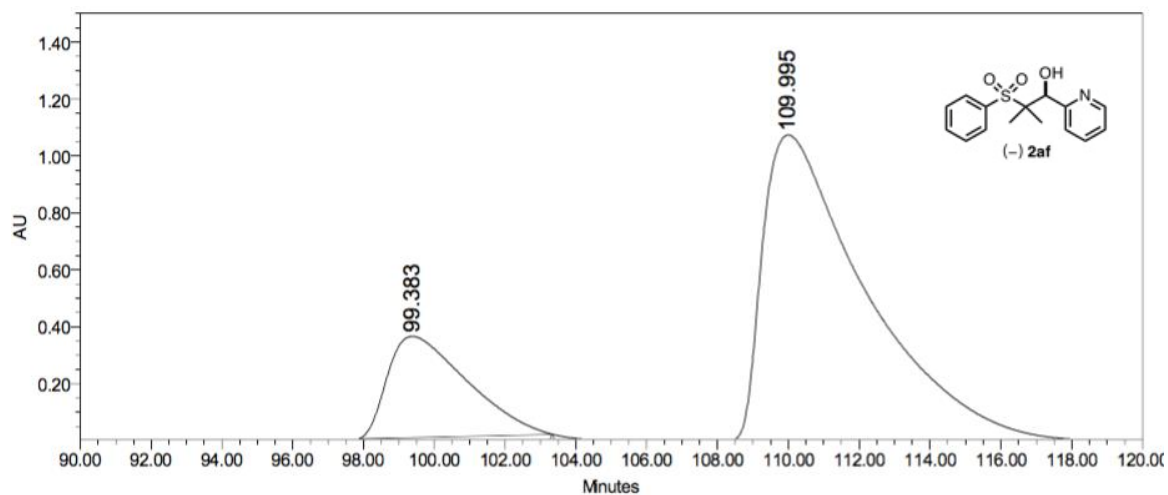

**Processed Channel Descr.: W2489 ChA 210nm**

|   | Processed Channel Descr. | RT      | Area      | % Area | Height  |
|---|--------------------------|---------|-----------|--------|---------|
| 1 | W2489 ChA 210nm          | 99.383  | 55089844  | 20.42  | 355947  |
| 2 | W2489 ChA 210nm          | 109.995 | 214725529 | 79.58  | 1070545 |

**2-Methyl-2-(phenylsulfonyl)-1-(thiophen-2-yl)propan-1-ol (2ag):**

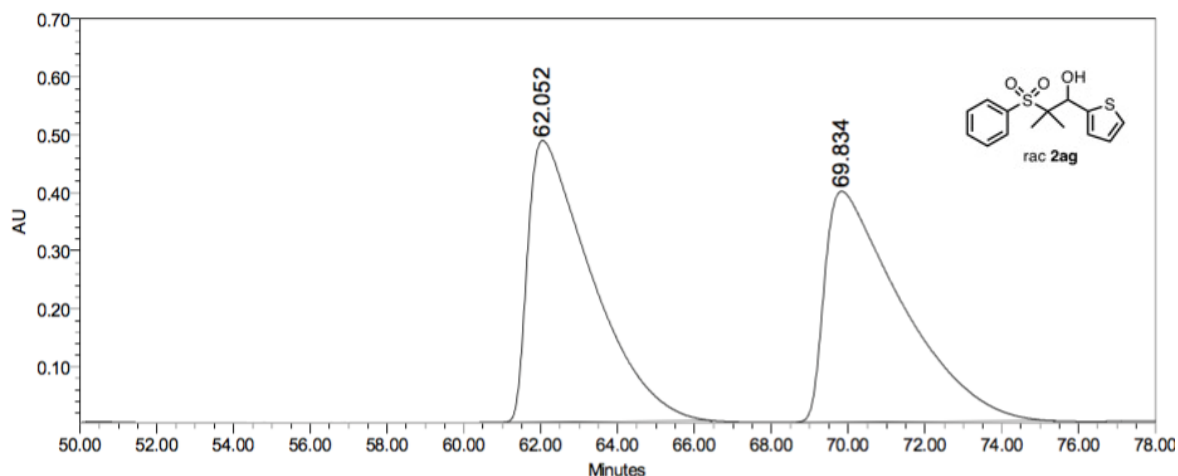

Channel: W2489 ChA; Processed Channel: W2489 ChA 210nm; Result Id: 1692; Processing Method: 488

**Processed Channel Descr.: W2489 ChA 210nm**

|   | Processed Channel Descr. | RT     | Area     | % Area | Height |
|---|--------------------------|--------|----------|--------|--------|
| 1 | W2489 ChA 210nm          | 62.052 | 55972832 | 50.20  | 485646 |
| 2 | W2489 ChA 210nm          | 69.834 | 55516596 | 49.80  | 397880 |

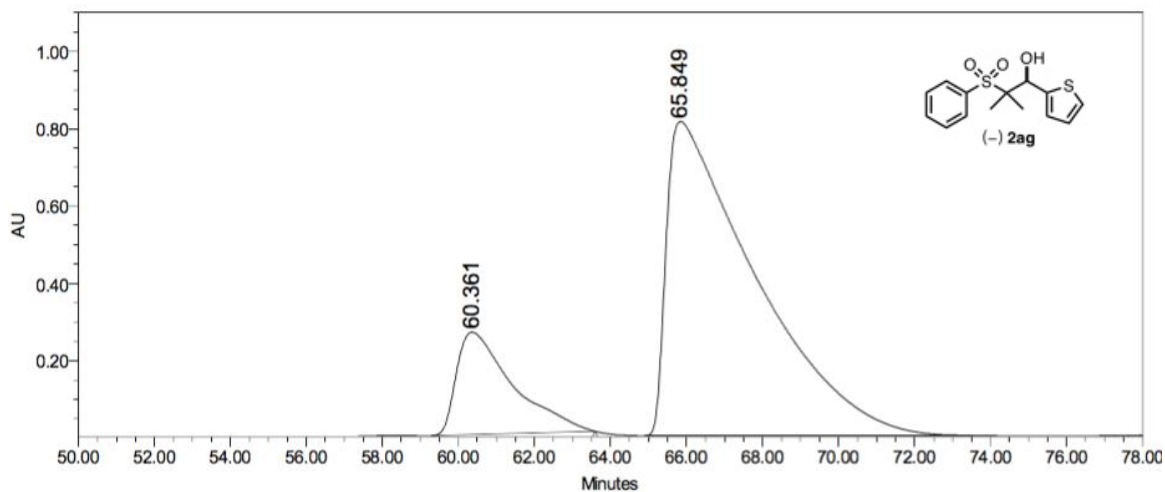

Channel: W2489 ChA; Processed Channel: W2489 ChA 210nm; Result Id: 1695; Processing Method: 0

**Processed Channel Descr.: W2489 ChA 210nm**

|   | Processed Channel Descr. | RT     | Area      | % Area | Height |
|---|--------------------------|--------|-----------|--------|--------|
| 1 | W2489 ChA 210nm          | 60.361 | 27119982  | 17.08  | 265218 |
| 2 | W2489 ChA 210nm          | 65.849 | 131683634 | 82.92  | 812671 |

## 2-Methyl-1-(naphthalen-1-yl)-2-(phenylsulfonyl)propan-1-ol (2ah):

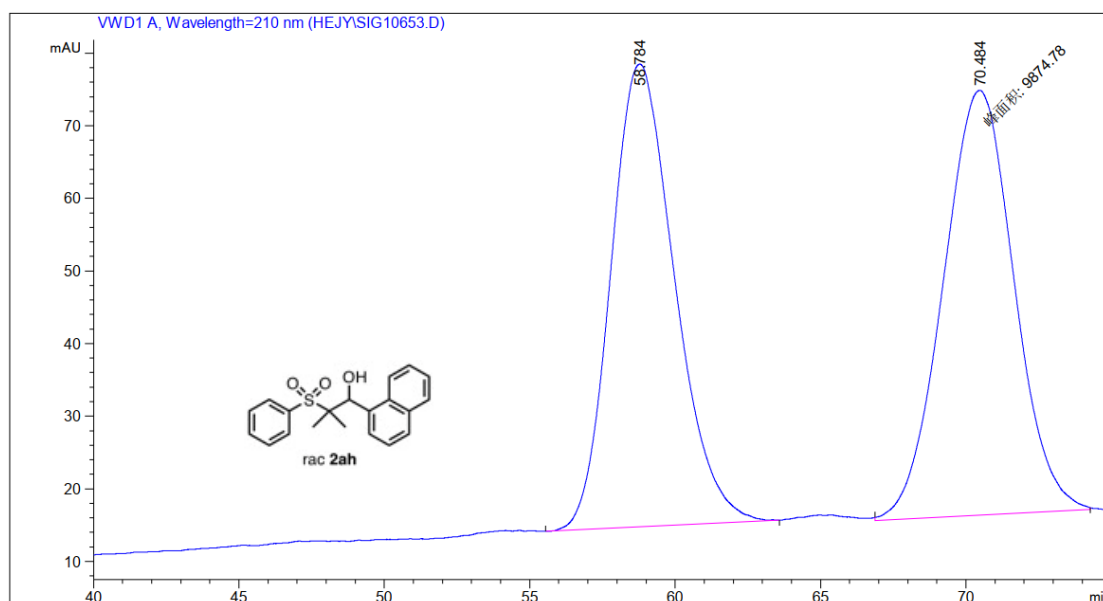

| # | [min]     | [min]  | [mAU*s]    | [mAU]    | %       |
|---|-----------|--------|------------|----------|---------|
| 1 | 58.784 BB | 2.1410 | 9679.78809 | 63.76239 | 49.5014 |
| 2 | 70.484 MM | 2.8132 | 9874.77832 | 58.50330 | 50.4986 |

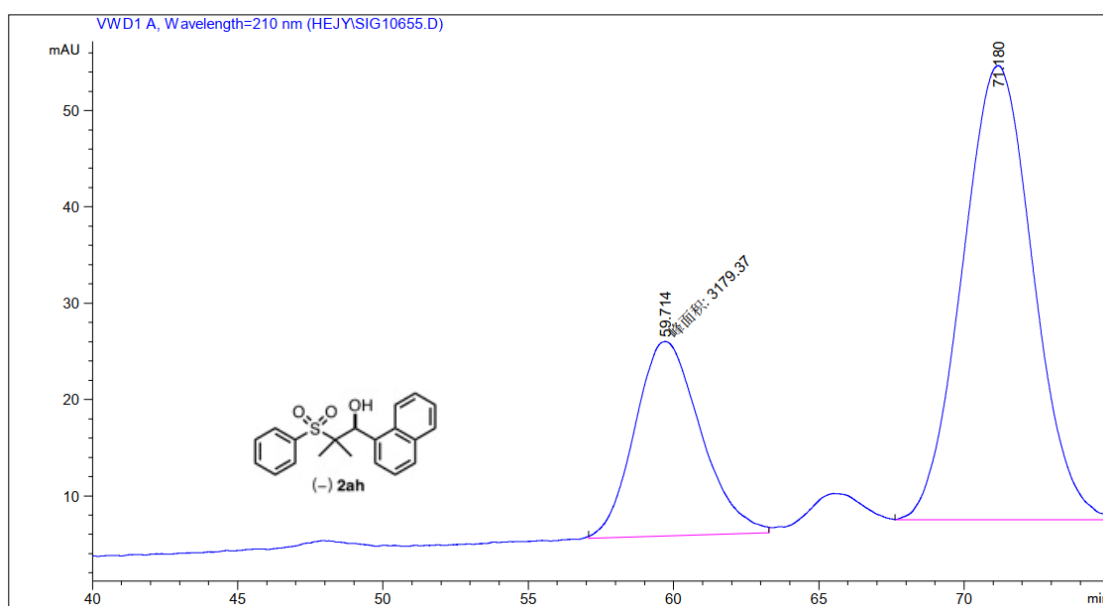

| # | [min]     | [min]  | [mAU*s]    | [mAU]    | %       |
|---|-----------|--------|------------|----------|---------|
| 1 | 59.714 MM | 2.6228 | 3179.36841 | 20.20325 | 28.5103 |
| 2 | 71.180 BB | 2.3074 | 7972.29736 | 47.15319 | 71.4897 |

**Phenyl(1-(phenylsulfonyl)cyclopentyl)methanol (2ai):**

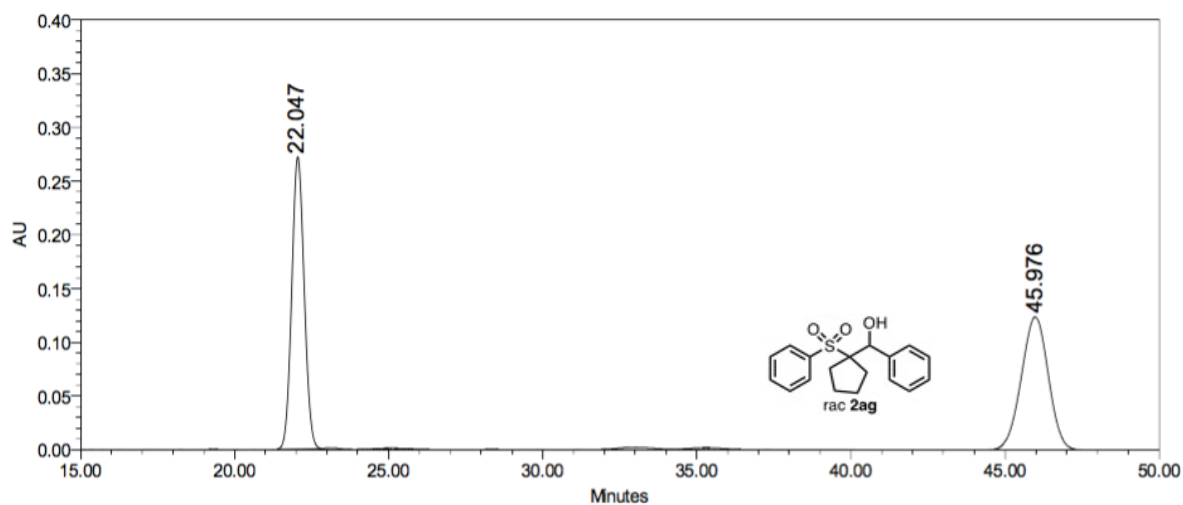

Channel: W2489 ChA; Processed Channel: W2489 ChA 215nm; Result Id: 3787; Processing Method: 5

**Processed Channel Descr.: W2489 ChA 215nm**

|   | Processed Channel Descr. | RT     | Area    | % Area | Height |
|---|--------------------------|--------|---------|--------|--------|
| 1 | W2489 ChA 215nm          | 22.047 | 7618521 | 50.38  | 272023 |
| 2 | W2489 ChA 215nm          | 45.976 | 7503257 | 49.62  | 123556 |

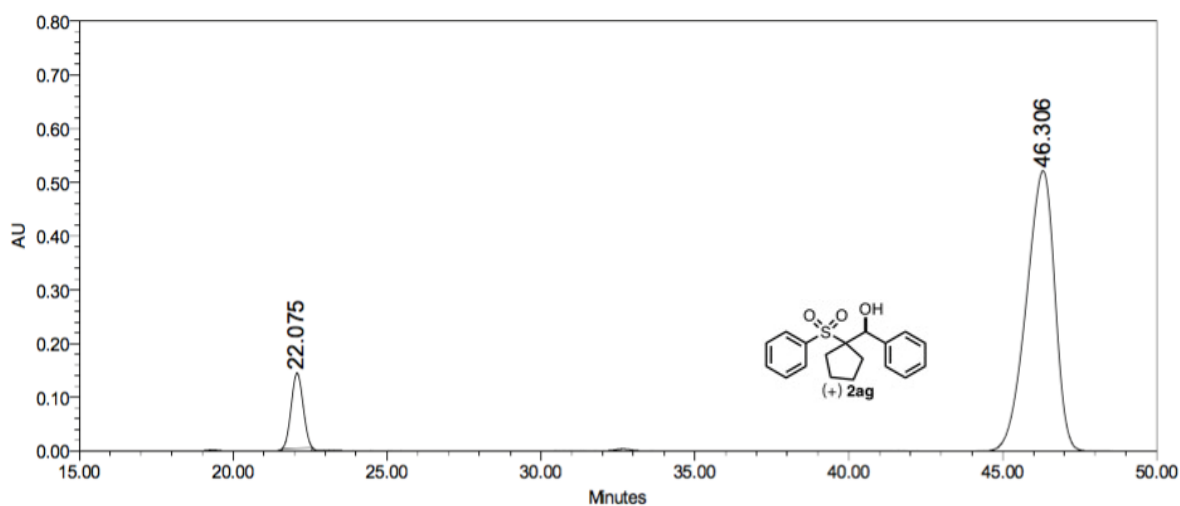

Channel: W2489 ChA; Processed Channel: W2489 ChA 215nm; Result Id: 3790; Processing Method: 6

**Processed Channel Descr.: W2489 ChA 215nm**

|   | Processed Channel Descr. | RT     | Area     | % Area | Height |
|---|--------------------------|--------|----------|--------|--------|
| 1 | W2489 ChA 215nm          | 22.075 | 3759172  | 10.07  | 140493 |
| 2 | W2489 ChA 215nm          | 46.306 | 33556493 | 89.93  | 521960 |

**1-([1,1'-Biphenyl]-2-yl)-2-methyl-2-(phenylsulfonyl)propan-1-ol (3a):**

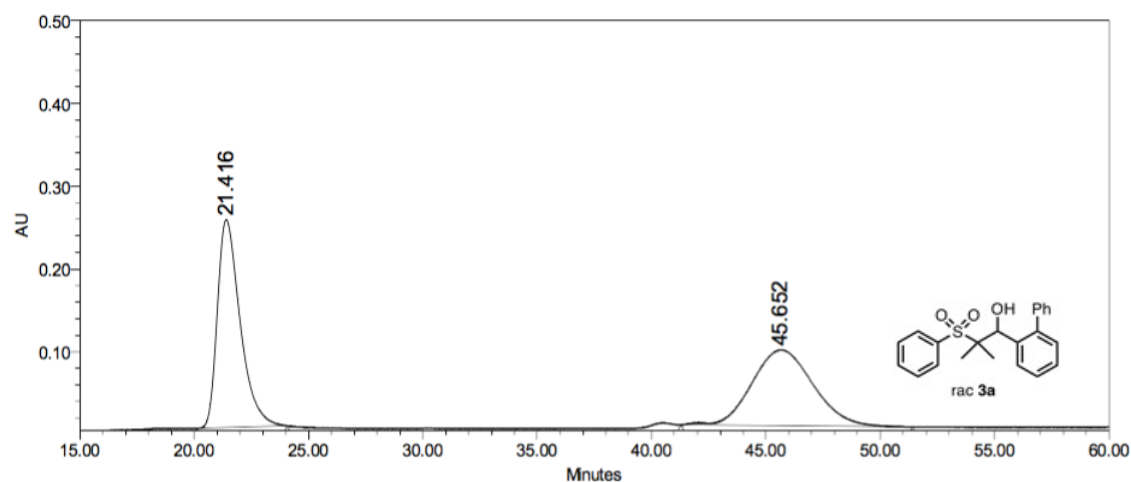

Channel: W2489 ChA; Processed Channel: W2489 ChA 215nm; Result Id: 3927; Processing Method: C

**Processed Channel Descr.: W2489 ChA 215nm**

|   | Processed Channel Descr. | RT     | Area     | % Area | Height |
|---|--------------------------|--------|----------|--------|--------|
| 1 | W2489 ChA 215nm          | 21.416 | 17416339 | 50.67  | 251019 |
| 2 | W2489 ChA 215nm          | 45.652 | 16953387 | 49.33  | 91614  |

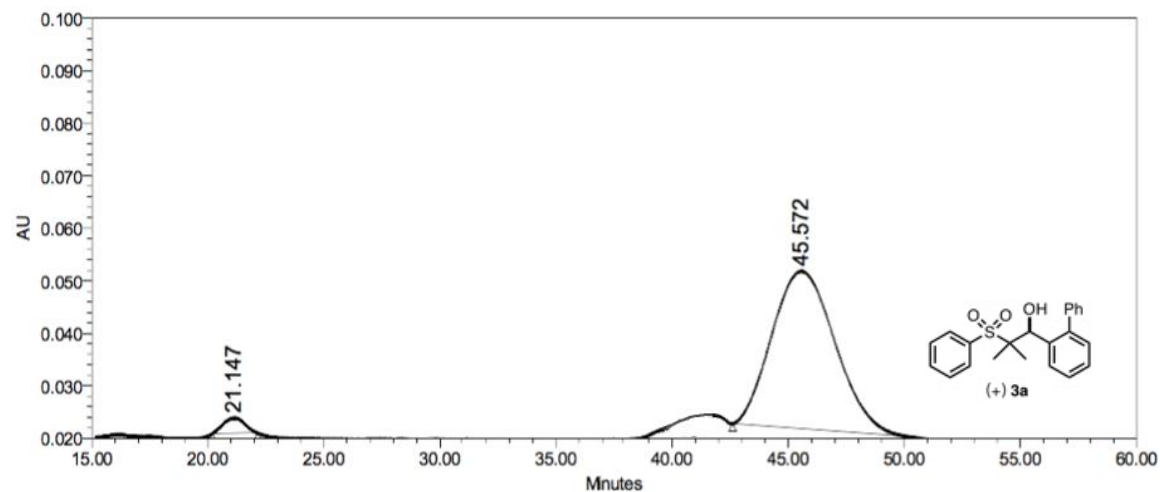

Channel: W2489 ChA; Processed Channel: W2489 ChA 215nm; Result Id: 3924; Processing Method: 1

**Processed Channel Descr.: W2489 ChA 215nm**

|   | Processed Channel Descr. | RT     | Area    | % Area | Height |
|---|--------------------------|--------|---------|--------|--------|
| 1 | W2489 ChA 215nm          | 21.147 | 193424  | 3.27   | 3129   |
| 2 | W2489 ChA 215nm          | 45.572 | 5718664 | 96.73  | 30269  |

### 1-(1-(Allyloxy)-2-methyl-2-(phenylsulfonyl)propyl)-2-bromobenzene (4a):

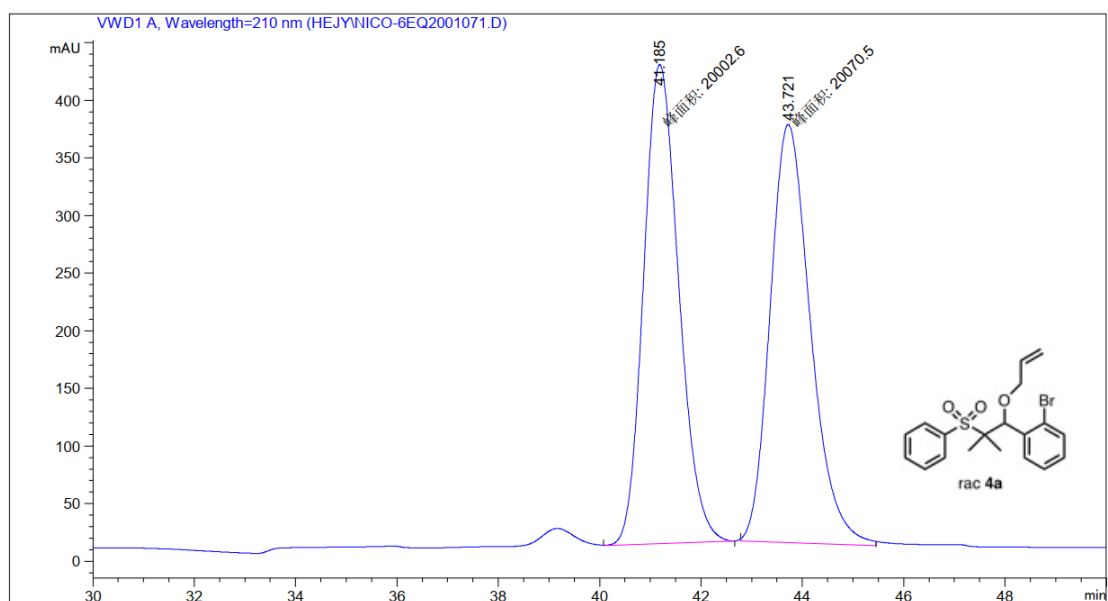

| # | [min]     | [min]  | [mAU*s]   | [mAU]     | %       |
|---|-----------|--------|-----------|-----------|---------|
| 1 | 41.185 MM | 0.8019 | 2.00026e4 | 415.73312 | 49.9153 |
| 2 | 43.721 MM | 0.9223 | 2.00705e4 | 362.67853 | 50.0847 |

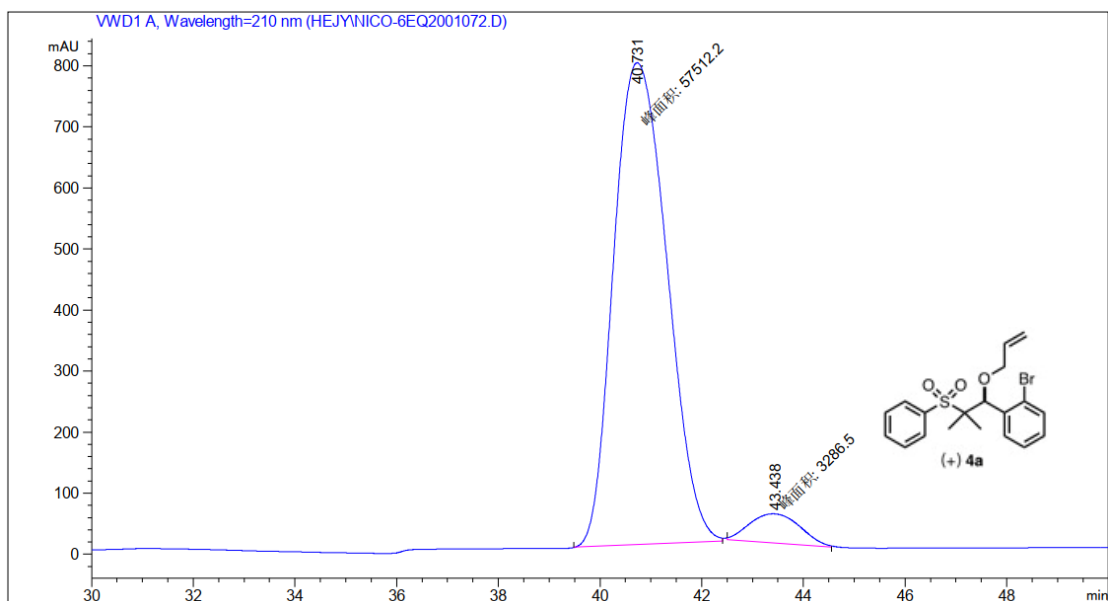

| # | [min]     | [min]  | [mAU*s]    | [mAU]     | %       |
|---|-----------|--------|------------|-----------|---------|
| 1 | 40.731 MM | 1.2149 | 5.75122e4  | 788.96301 | 94.5945 |
| 2 | 43.438 MM | 1.1492 | 3286.50317 | 47.66371  | 5.4055  |

### 4-Methylene-1-(2-(phenylsulfonyl)propan-2-yl)isochromane (5a):

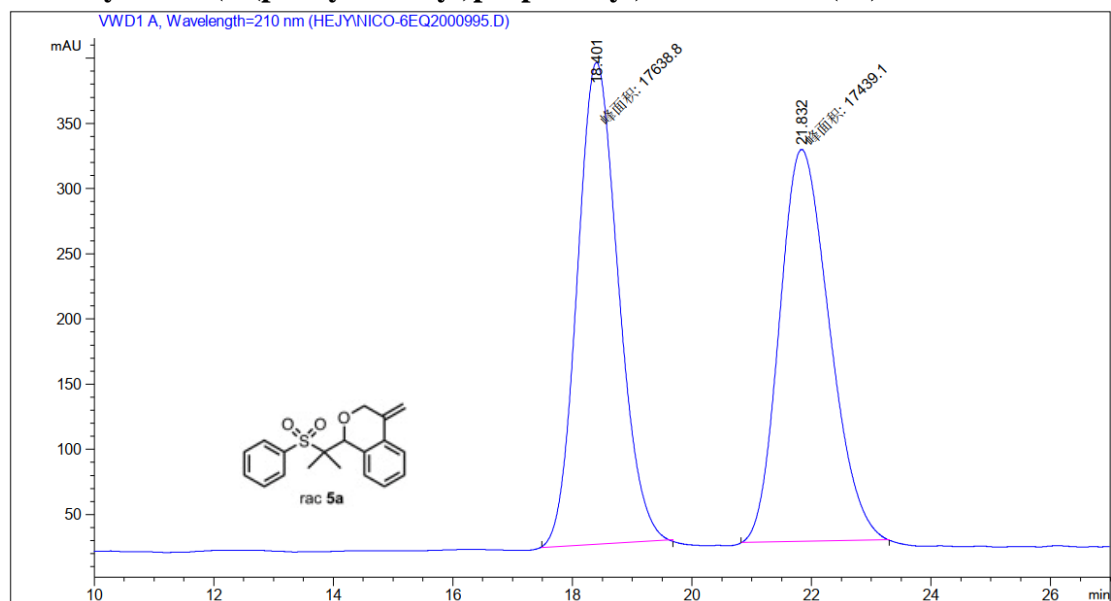

| # | [min]  | [min]  | [mAU*s]   | [mAU]     | %       |
|---|--------|--------|-----------|-----------|---------|
| 1 | 18.401 | 0.7952 | 1.76388e4 | 369.69931 | 50.2846 |
| 2 | 21.832 | 0.9668 | 1.74391e4 | 300.62183 | 49.7154 |

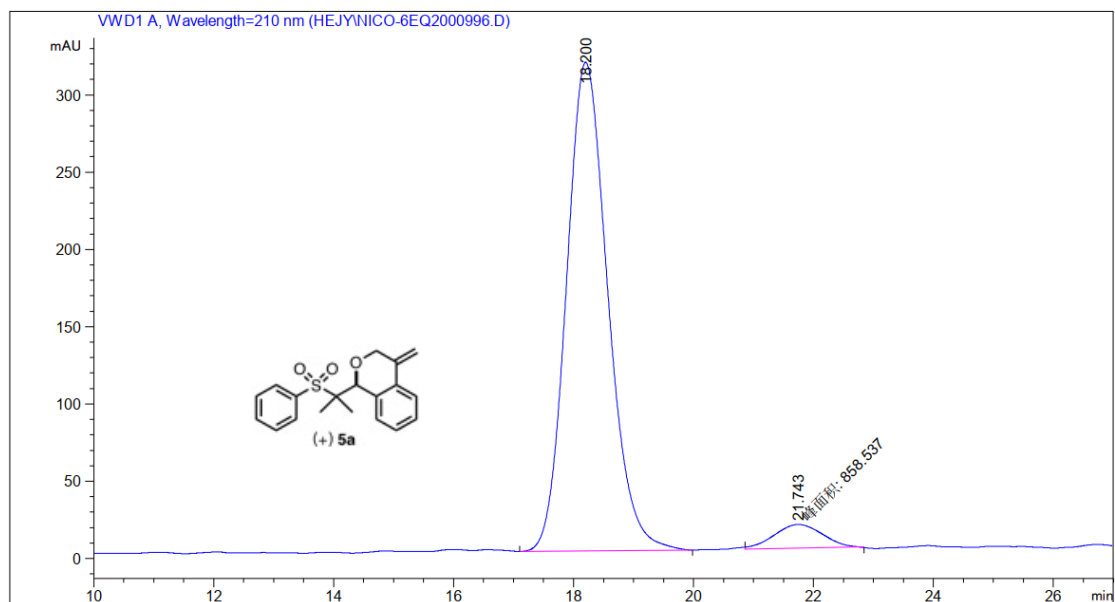

| # | [min]  | [min]  | [mAU*s]   | [mAU]     | %       |
|---|--------|--------|-----------|-----------|---------|
| 1 | 18.200 | 0.7377 | 1.51021e4 | 316.24963 | 94.6209 |
| 2 | 21.743 | 0.9310 | 858.53680 | 15.36941  | 5.3791  |
